# Supplementary material for: Comparative genome analysis identifies necrosis-inducing effectors in the lentil pathogen Ascochyta lentis in isolates with distinct virulence profiles
Source: Research Square preprint supplement (doi:10.21203/rs.3.rs-7803979/v1), 2025-10-22
Supplement: Supplementary file 1 [file 0f19674a3c64d70d9a08e5db.xlsx]

## Sheet: Sheet1
AlKewell assembly	SAMN16869256
AlKewell illumina whole genome reads	SRR23294009
AlKewell Nanopore raw reads (FAST5)	SRR13123337
AlKewell Nanopore basecalled reads	SRR23294005
AlKewell illumina RNAseq reads	SRR23294008, SRR23293997, SRR23293990, SRR23293989, SRR23293988, SRR23293987, SRR23293986, SRR23293985, SRR23293984, SRR23294007, SRR23294006,
P94-24 assembly	SAMN18477938
P94-24 illumina whole genome reads	SRR23294004
P94-24 Nanopore raw reads (FAST5)	SRR14126455
P94-24 Nanopore basecalled reads	SRR23293991
P94-24 illumina RNAseq reads	SRR23294003, SRR23294002, SRR23294001, SRR23294000, SRR23293999, SRR23293998, SRR23293996, SRR23293995, SRR23293994, SRR23293993, SRR23293992
AlKewell nuclear genome	https://pulsepathogens.genome.edu.au/apollo/394538/jbrowse/index.html
AlKewell mitochondrial genome	https://pulsepathogens.genome.edu.au/apollo/394661/jbrowse/index.html
P94-24 nuclear genome	https://pulsepathogens.genome.edu.au/apollo/394707/jbrowse/index.html
P94-24 mitochondrial genome	https://pulsepathogens.genome.edu.au/apollo/394768/jbrowse/index.html
