# Supplementary material for: Comparative genome analysis identifies necrosis-inducing effectors in the lentil pathogen Ascochyta lentis in isolates with distinct virulence profiles
Source: Research Square preprint supplement (doi:10.21203/rs.3.rs-7803979/v1), 2025-10-22
Supplement: Supplementary file 2 [file 27381d66c545901d11e55f93.xlsx]

## Sheet: Table S4b - predector results -
name	effector_score	manual_effector_score	manual_secretion_score	effector_matches	phibase_genes	phibase_phenotypes	phibase_ids	has_phibase_effector_match	has_phibase_virulence_match	has_phibase_lethal_match	pfam_ids	pfam_names	has_pfam_virulence_match	dbcan_matches	has_dbcan_virulence_match	effectorp1	effectorp2	effectorp3_cytoplasmic	effectorp3_apoplastic	effectorp3_noneffector	deepredeff_fungi	deepredeff_oomycete	apoplastp	is_secreted	any_signal_peptide	single_transmembrane	multiple_transmembrane	molecular_weight	residue_number	charge	isoelectric_point	aa_c_number	aa_tiny_number	aa_small_number	aa_aliphatic_number	aa_aromatic_number	aa_nonpolar_number	aa_charged_number	aa_basic_number	aa_acidic_number	fykin_gap	kex2_cutsites	rxlr_like_motifs	localizer_nucleus	localizer_chloro	localizer_mito	signal_peptide_cutsites	signalp3_nn	signalp3_hmm
XPS72150.1	3.941	6.708	3.312	.	.	.	.	0	0	0	.	.	0	.	0	1	0.983	.	0.908	.	0.632	0.463	0.82	1	1	0	0	7469.56	69	3.5	8.084	8	29	41	16	9	44	12	8	4	1	.	REIR:55-58	0	0	0	SignalP3NN:17,SignalP5:17,DeepSig:17,SignalP3HMM:18,SignalP4:18,Phobius:18,SignalP6:18	1	1
XPS77111.1	3.941	7.214	3.312	.	.	.	.	0	0	0	.	.	0	.	0	1	0.984	0.81	0.959	.	0.984	0.328	0.88	1	1	0	0	8917.08	84	-1.5	4.93	9	37	52	21	6	47	17	8	9	1.05	.	RKYC:20-23,KSLC:41-44	0	0	0	SignalP3NN:18,SignalP3HMM:18,SignalP4:18,SignalP5:18,DeepSig:18,Phobius:18,SignalP6:18	1	1
XPS69095.1	3.836	6.279	3.241	.	.	.	.	0	0	0	.	.	0	.	0	0.904	0.955	.	0.556	.	0.907	0.541	0.5	1	1	0	0	23615.7	215	2.5	7.69	4	76	127	61	24	117	48	26	22	1.06	LSQR:LXXR:67-70,LEKR:[LIJVAP]X[KRTPEI]R&LXXR:73-76,KR:[KR]R:75-76,KR:[KR]R:151-152,LSCR:LXXR:212-215	KSLS:65-68,KRIV:75-78,KDIS:108-111,KGYG:146-149	0	0	0	SignalP3NN:20,SignalP3HMM:20,SignalP4:20,SignalP5:20,DeepSig:20,Phobius:20,SignalP6:20	1	1
XPS67726.1	3.498	6.404	3.308	.	.	.	.	0	0	0	.	.	0	.	0	1	0.945	.	0.929	.	0.033	0.426	0.85	1	1	0	0	12526.3	119	7	9.116	6	47	76	34	11	70	18	13	5	1.029	LNER:[LIJVAP]X[KRTPEI]R&LXXR:25-28	HDLN:23-26,KMFQ:34-37,RIIN:89-92	0	0	0	SignalP3NN:17,SignalP3HMM:17,SignalP4:17,SignalP5:17,DeepSig:17,Phobius:21,SignalP6:28	1	1
XPS71014.1	3.453	6.98	3.312	.	.	.	.	0	0	0	.	.	0	.	0	1	0.984	0.501	0.796	.	0.994	0.469	0.59	1	1	0	0	7369.45	65	1	6.801	9	24	36	12	11	34	17	10	7	1.875	RR:[KR]R:2-3	RRFL:2-5,KELV:54-57,HVYC:59-62	0	0	0	SignalP3NN:21,SignalP3HMM:21,SignalP4:21,SignalP5:21,DeepSig:21,Phobius:21,SignalP6:21	1	1
XPS76720.1	3.276	7.033	3.312	.	.	.	.	0	0	0	.	.	0	.	0	1	0.966	0.663	0.925	.	0.985	0.376	0.87	1	1	0	0	10417.8	99	2	7.628	12	46	67	23	7	59	18	10	8	0.862	.	.	0	0	0	SignalP3NN:19,SignalP3HMM:19,SignalP4:19,SignalP5:19,DeepSig:19,Phobius:19,SignalP6:19	1	1
XPS70623.1	3.247	6.568	3.312	.	.	.	.	0	0	0	.	.	0	.	0	1	0.95	.	0.817	.	0.983	0.463	0.84	1	1	0	0	12035.7	111	5	7.632	8	40	69	29	17	66	23	16	7	0.857	.	KKFI:3-6,RCWS:42-45,RGFD:57-60,HCIT:94-97	0	0	0	SignalP3NN:18,SignalP3HMM:18,SignalP4:18,SignalP5:18,DeepSig:18,Phobius:18,SignalP6:18	1	1
XPS81080.1	3.236	8.602	3.312	RiSLM,Mg1LysM,MgxLysM,MoSlp1,CfEcp6	.	.	.	0	0	0	PF01476	Domain:LysM	1	CBM50	0	0.999	0.951	.	0.919	.	0.882	0.444	0.7	1	1	0	0	15298.3	138	5	8.246	6	46	81	34	15	71	29	18	11	1.393	ATRR:[LIJVAP]X[KRTPEI]R:18-21,RR:[KR]R:20-21,RR:[KR]R:63-64	RTFV:2-5,KGYY:87-90,KQIK:117-120	0	0	0	SignalP3NN:18,SignalP3HMM:18,SignalP4:18,SignalP5:18,DeepSig:18,Phobius:18,SignalP6:18	1	1
XPS75390.1	3.146	4.551	3.312	.	.	.	.	0	0	0	.	.	0	.	0	0.986	0.94	.	.	0.556	0.212	0.348	0.61	1	1	0	0	16978.2	153	2	7.554	6	56	84	35	23	90	33	18	15	0.925	LTTR:[LIJVAP]X[KRTPEI]R&LXXR:45-48	KSIS:2-5,RYFK:84-87,KKFK:142-145	0	0	0	SignalP3NN:18,SignalP3HMM:18,SignalP4:18,SignalP5:18,Phobius:18,DeepSig:21,SignalP6:21	1	1
XPS72974.1	3.137	8.335	3.31	LmAvrLm3	.	.	.	0	0	0	.	.	0	.	0	0.999	0.937	.	0.853	.	0.071	0.418	0.77	1	1	0	0	17924.3	166	6.5	8.175	10	66	102	45	18	88	31	20	11	1.206	.	HTMS:5-8,KIIL:10-13,RAIS:29-32,KNWC:48-51,RGFS:58-61	0	1	0	SignalP3NN:25,SignalP3HMM:25,SignalP4:25,SignalP5:25,DeepSig:25,Phobius:25,SignalP6:25	1	1
XPS79590.1	3.112	7.118	2.802	.	.	.	.	0	0	0	PF00160	Domain:Pro_isomerase	1	.	0	0.952	0.818	0.663	.	.	0.211	0.499	0.46	1	1	0	0	11547.5	104	7	10.191	0	33	47	30	17	59	23	16	7	1.6	.	KVYF:37-40,RALA:69-72,KGFG:76-79,RVIN:87-90	0	0	0	SignalP3NN:28,SignalP3HMM:28,SignalP4:28,SignalP5:28,DeepSig:28,Phobius:28,SignalP6:28	1	1
XPS74018.1	3.091	7.004	3.312	.	.	.	.	0	0	0	.	.	0	.	0	1	0.962	0.64	0.927	.	0.989	0.425	0.7	1	1	0	0	8357.34	75	0	6.453	6	29	42	15	12	41	16	9	7	1.118	PNTR:[LIJVAP]X[KRTPEI]R:65-68	HFIN:2-5,KEYD:35-38	0	0	0	SignalP3NN:15,SignalP3HMM:15,SignalP4:15,SignalP5:15,DeepSig:15,Phobius:15,SignalP6:15	1	1
XPS77903.1	3.077	8.851	3.312	MoBas3	.	.	.	0	0	0	.	.	0	.	0	1	0.95	0.813	0.904	.	0.153	0.473	0.75	1	1	0	0	9084.29	83	0.5	6.818	8	34	51	22	10	49	19	10	9	1.105	KR:[KR]R:55-56	.	0	0	0	SignalP3NN:19,SignalP3HMM:19,SignalP4:19,SignalP5:19,DeepSig:19,Phobius:19,SignalP6:19	1	1
XPS75892.1	3.077	6.874	3.312	.	.	.	.	0	0	0	.	.	0	.	0	1	0.946	0.511	0.959	.	0.983	0.541	0.8	1	1	0	0	11899.5	115	0	6.055	12	53	75	27	7	69	18	9	9	0.719	.	RSFP:107-110	0	0	0	SignalP3NN:18,SignalP3HMM:18,SignalP4:18,SignalP5:18,DeepSig:18,Phobius:18,SignalP6:18	1	1
XPS77600.1	3.069	6.946	2.528	FoeNEP1,BfNep1,VdNEP,PpNPP1,PiNPP1,PsojNIP,PaSD21-1,MpNEP1_1,MpNEP1_2	.	.	.	0	0	0	PF05630	Family:NPP1	1	.	0	0.795	0.832	.	0.78	.	0.864	0.659	0.63	1	1	0	0	26209.1	242	0	6.492	2	82	148	69	32	133	54	29	25	0.859	LKAR:LXXR:23-26,IPTR:[LIJVAP]X[KRTPEI]R:37-40,AIER:[LIJVAP]X[KRTPEI]R:49-52,LYAR:LXXR:97-100	KPIP:35-38,RAIE:48-51,HDWE:132-135,KILG:150-153,HELQ:187-190,KSYW:197-200,KAFV:239-242	0	0	0	SignalP3NN:18,SignalP3HMM:18,SignalP4:18,SignalP5:18,DeepSig:18,Phobius:25,SignalP6:26	1	1
XPS81075.1	3.023	6.406	3.312	.	.	.	.	0	0	0	.	.	0	.	0	0.999	0.93	.	0.918	.	0.428	0.339	0.91	1	1	0	0	13158.7	125	1	7.378	8	57	82	31	13	74	19	10	9	0.853	.	RDLC:41-44	0	0	0	SignalP3NN:18,SignalP3HMM:18,SignalP4:18,SignalP5:18,DeepSig:18,Phobius:18,SignalP6:18	1	1
XPS75930.1	3	6.576	3.312	.	.	.	.	0	0	0	.	.	0	.	0	1	0.939	.	0.962	.	0.937	0.243	0.95	1	1	0	0	9332.66	86	5	8.494	6	31	52	20	10	48	16	11	5	1.3	.	KSIY:25-28,KKLN:32-35,KKLN:47-50,HGYV:79-82	0	0	0	DeepSig:14,SignalP6:14,SignalP3NN:19,SignalP4:19,SignalP5:19,SignalP3HMM:22,Phobius:22	1	1
XPS74579.1	2.98	6.493	3.312	.	.	.	.	0	0	0	.	.	0	.	0	1	0.958	.	0.926	.	0.14	0.366	0.73	1	1	0	0	11895.6	114	2.5	7.811	8	52	69	29	11	69	21	12	9	0.879	.	KAFA:2-5,KAYK:57-60,RSYF:109-112	0	0	0	SignalP3NN:19,SignalP3HMM:19,SignalP4:19,SignalP5:19,DeepSig:19,Phobius:19,SignalP6:19	1	1
XPS76091.1	2.89	8.943	3.312	LmAvrLm4_7	.	.	.	0	0	0	PF18661	Domain:AvrLm4-7	1	.	0	1	0.964	0.64	0.789	.	0.982	0.386	0.62	1	1	0	0	14848.8	127	2	7.18	8	34	63	27	21	68	30	17	13	2	.	KYLE:51-54,HTIQ:65-68,REWM:93-96,KSYF:104-107,KNLP:112-115	0	0	0	SignalP3NN:19,SignalP3HMM:19,SignalP4:19,SignalP5:19,DeepSig:19,Phobius:19,SignalP6:19	1	1
XPS75409.1	2.863	6.51	3.312	.	.	.	.	0	0	0	.	.	0	.	0	1	0.916	0.536	0.881	.	0.049	0.306	0.78	1	1	0	0	12482.6	116	5	8.504	8	41	72	31	5	64	25	15	10	0.846	LDTR:[LIJVAP]X[KRTPEI]R&LXXR:19-22,PYPR:[LIJVAP]X[KRTPEI]R:37-40,LATR:[LIJVAP]X[KRTPEI]R&LXXR:78-81,KR:[KR]R:83-84	RLLL:2-5,RQFI:22-25,KPYP:36-39,KGLS:70-73,KRLK:83-86	0	0	0	SignalP3NN:16,SignalP3HMM:16,SignalP4:16,DeepSig:16,SignalP6:16,SignalP5:18,Phobius:18	1	1
XPS77902.1	2.836	6.59	3.312	.	.	.	.	0	0	0	.	.	0	.	0	1	0.929	0.57	0.865	.	0.077	0.33	0.85	1	1	0	0	9253.7	86	6	8.5	8	36	54	25	8	47	15	11	4	1.312	.	RLLT:3-6,KPYI:82-85	0	0	0	SignalP3NN:20,SignalP3HMM:20,SignalP4:20,SignalP5:20,DeepSig:20,Phobius:20,SignalP6:20	1	1
XPS80744.1	2.834	5.703	2.702	.	.	.	.	0	0	0	.	.	0	.	0	0.923	0.868	0.548	0.731	.	0.993	0.683	0.56	1	1	0	0	23271.1	209	-1.5	5.994	3	65	113	53	32	112	45	23	22	1.442	LAKR:[LIJVAP]X[KRTPEI]R&LXXR:154-157,KR:[KR]R:156-157,KR:[KR]R:175-176	RFFP:2-5,KDIK:87-90,HSFN:108-111,KSFS:116-119,HGFI:123-126,HRLA:152-155,RDMY:157-160,REII:176-179	0	0	0	SignalP3NN:19,SignalP3HMM:19,SignalP4:19,SignalP5:19,DeepSig:19,Phobius:19,SignalP6:19	1	1
XPS73293.1	2.823	5.991	3.309	.	.	.	.	0	0	0	.	.	0	.	0	0.912	0.846	.	0.89	.	0.975	0.366	0.83	1	1	0	0	11791.2	112	2.5	8.245	3	46	73	36	13	65	15	9	6	1.2	VQIR:[LIJVAP]X[KRTPEI]R:76-79	KLIY:2-5,KNLS:62-65,RNIV:73-76,KFYW:85-88	0	0	0	SignalP3NN:16,SignalP3HMM:16,SignalP4:16,SignalP5:16,Phobius:16,SignalP6:19,DeepSig:21	1	1
XPS77904.1	2.808	6.327	3.312	.	.	.	.	0	0	0	.	.	0	.	0	1	0.939	.	0.833	.	0.016	0.347	0.91	1	1	0	0	10403.8	96	2	7.479	8	40	59	27	9	53	15	9	6	0.913	.	RILS:3-6	0	0	0	SignalP3NN:20,SignalP3HMM:20,SignalP4:20,SignalP5:20,DeepSig:20,Phobius:20,SignalP6:20	1	1
XPS73297.1	2.808	6.702	3.312	.	.	.	.	0	0	0	.	.	0	.	0	1	0.933	0.538	0.735	.	0.94	0.426	0.85	1	1	0	0	10348	96	4.5	8.155	10	40	57	24	11	60	15	10	5	1.087	LLRR:[LIJVAP]X[KRTPEI]R&LXXR:90-93,RR:[KR]R:92-93	KYFT:2-5,KDFV:50-53	0	0	0	SignalP3NN:17,SignalP3HMM:17,SignalP4:17,SignalP5:17,DeepSig:17,Phobius:17,SignalP6:17	1	1
XPS69675.1	2.806	8.194	3.274	.	.	.	.	0	0	0	PF03211	Repeat:Pectate_lyase	1	PL3_2,PL3,PL3_4,PL3_5,PL3_1,PL3_3	0	1	0.887	.	0.935	.	0.588	0.43	0.95	1	1	0	0	24732.8	237	0	6.399	16	102	153	67	21	139	45	23	22	1.032	KR:[KR]R:177-178	KVIT:39-42,KLYR:164-167	0	0	0	SignalP3NN:20,SignalP3HMM:20,SignalP4:20,SignalP5:20,DeepSig:20,Phobius:20,SignalP6:20	1	1
XPS74034.1	2.8	6.308	3.308	.	.	.	.	0	0	0	.	.	0	.	0	0.999	0.892	.	0.894	.	0.971	0.692	0.83	1	1	0	0	18838.4	174	1.5	7.37	10	64	111	40	16	97	34	18	16	0.93	LAVR:LXXR:88-91	KMYV:98-101,KGWT:161-164	0	0	0	SignalP3NN:16,SignalP3HMM:16,SignalP4:16,SignalP5:16,DeepSig:16,Phobius:16,SignalP6:16	1	1
XPS75574.1	2.788	6.19	3.285	.	.	.	.	0	0	0	PF07452	Domain:CHRD	0	.	0	0.966	0.862	0.682	0.641	.	0.337	0.573	0.83	1	1	0	0	22670.6	210	6	8.976	3	74	123	59	25	117	46	27	19	1.05	PNER:[LIJVAP]X[KRTPEI]R:149-152,RR:[KR]R:152-153	KTYI:33-36,KDLD:41-44,KLFY:59-62,KGLF:91-94,RRIS:152-155,RQIV:182-185,RQFL:198-201	0	0	0	SignalP3NN:19,SignalP3HMM:19,SignalP4:19,SignalP5:19,DeepSig:19,Phobius:19,SignalP6:19	1	1
XPS72601.1	2.759	8.418	3.31	GoEC2,MoCDIP2,MoCDIP11,BghBEC4	.	.	.	0	0	0	PF05730	Domain:CFEM	1	.	0	1	0.922	0.514	0.68	.	0.004	0.499	0.68	1	1	0	0	16641.1	151	1.5	7.339	11	57	85	44	14	85	28	15	13	1	RR:[KR]R:127-128,LSRR:[LIJVAP]X[KRTPEI]R&LXXR:133-136,RR:[KR]R:135-136	RCLD:37-40,KLLA:43-46,KTYG:137-140	0	0	0	SignalP3NN:18,SignalP3HMM:18,SignalP4:18,SignalP5:18,DeepSig:18,Phobius:18,SignalP6:18	1	1
XPS71024.1	2.752	6.305	3.312	.	.	.	.	0	0	0	.	.	0	.	0	0.999	0.933	.	0.845	.	0.029	0.709	0.78	1	1	0	0	9404.59	87	1.5	7.142	6	36	53	20	13	51	15	9	6	0.905	PCKR:[LIJVAP]X[KRTPEI]R:59-62,KR:[KR]R:61-62	KSFV:33-36,RQFN:62-65	0	0	0	SignalP3NN:18,SignalP3HMM:18,SignalP4:18,SignalP5:18,DeepSig:18,Phobius:18,SignalP6:18	1	1
XPS80473.1	2.747	6.6	3.312	.	.	.	.	0	0	0	.	.	0	.	0	1	0.917	0.659	0.761	.	0.462	0.256	0.66	1	1	0	0	8153.55	76	4	8.246	6	30	42	22	6	45	13	9	4	1.111	.	KLLA:2-5,RCLP:41-44,RGMK:49-52,KHYC:70-73	0	0	0	SignalP3NN:18,SignalP3HMM:18,SignalP4:18,SignalP5:18,DeepSig:18,Phobius:18,SignalP6:18	1	1
XPS79541.1	2.727	5.816	3.31	.	.	.	.	0	0	0	.	.	0	.	0	0.906	0.822	0.791	.	.	0.971	0.395	0.17	1	1	0	0	19355.7	170	5.5	8.493	2	51	88	44	28	85	43	26	17	1.257	LQTR:[LIJVAP]X[KRTPEI]R&LXXR:31-34,KR:[KR]R:57-58,AFTR:[LIJVAP]X[KRTPEI]R:61-64,VYER:[LIJVAP]X[KRTPEI]R:67-70	RAFV:64-67,RDIS:70-73,RYIA:77-80,KDYI:81-84	0	0	0	SignalP3NN:18,SignalP3HMM:18,SignalP4:18,Phobius:18,SignalP5:23,DeepSig:23,SignalP6:23	1	1
XPS78122.1	2.708	5.506	2.891	MoCDIP1	.	.	.	0	0	0	PF00544	Repeat:Pectate_lyase_4	0	PL1_10,PL1_7,PL1,PL1_9,PL1_5,PL1_6,PL1_3,PL1_4,PL1_12,PL1_11,PL1_13,PL1_1,PL1_8	0	0.049	0.659	.	0.553	.	0.472	0.325	0.83	1	1	0	0	36331.8	335	10	9.56	0	108	196	102	41	179	73	44	29	1.429	LTSR:LXXR:77-80,VVKR:[LIJVAP]X[KRTPEI]R:325-328,KR:[KR]R:327-328	KIIY:67-70,KSII:87-90,RNFA:114-117,RKIV:119-122,RVWI:134-137,HNYW:204-207,HIYN:223-226	0	1	0	SignalP3NN:17,SignalP3HMM:17,SignalP4:17,SignalP5:17,DeepSig:17,Phobius:17,SignalP6:17	1	1
XPS77139.1	2.682	6.876	3.312	.	.	.	.	0	0	0	.	.	0	.	0	1	0.96	0.685	0.896	.	0.364	0.281	0.87	1	1	0	0	11077.7	101	4	7.847	8	35	60	28	11	57	22	14	8	1.304	PRRR:[LIJVAP]X[KRTPEI]R:30-33,RR:[KR]R:31-32	KNFC:44-47,HPIT:61-64	0	0	0	SignalP3NN:19,SignalP3HMM:19,SignalP4:19,SignalP5:19,DeepSig:19,Phobius:19,SignalP6:19	1	1
XPS73461.1	2.681	6.116	3.312	.	.	.	.	0	0	0	.	.	0	.	0	0.962	0.897	.	0.906	.	0.02	0.446	0.81	1	1	0	0	9383.62	88	2.5	7.938	6	40	57	20	8	45	15	9	6	0.95	KR:[KR]R:79-80	KCFK:76-79	1	0	0	SignalP3NN:22,SignalP3HMM:22,SignalP4:22,SignalP5:22,DeepSig:22,Phobius:22,SignalP6:22	1	1
XPS69261.1	2.663	5.126	3.305	.	.	.	.	0	0	0	.	.	0	.	0	1	0.637	0.902	0.512	.	0.144	0.294	0.55	1	1	0	0	21390.4	202	1	7.952	0	82	118	48	33	133	51	26	25	0.624	AAKR:[LIJVAP]X[KRTPEI]R:62-65,KR:[KR]R:64-65,AQKR:[LIJVAP]X[KRTPEI]R:104-107,KR:[KR]R:106-107,AQKR:[LIJVAP]X[KRTPEI]R:145-148,KR:[KR]R:147-148,KR:[KR]R:187-188	.	0	0	0	SignalP4:16,SignalP5:16,SignalP6:16,SignalP3NN:19,SignalP3HMM:19,DeepSig:19,Phobius:19	1	1
XPS76216.1	2.623	6.102	3.165	.	.	.	.	0	0	0	.	.	0	.	0	0.931	0.858	0.706	0.625	.	0.755	0.359	0.6	1	1	0	0	20988.6	193	0.5	6.627	5	69	109	52	23	99	47	25	22	1.3	KR:[KR]R:132-133,KR:[KR]R:134-135	KDID:39-42,HNIC:43-46,KHFI:81-84,KHYN:154-157,KGIP:159-162,KHLA:170-173	1	0	0	Phobius:19,SignalP6:19,SignalP3NN:20,SignalP3HMM:20,SignalP4:20,SignalP5:20,DeepSig:20	1	1
XPS76161.1	2.623	8.21	3.312	CfPDIP1	.	.	.	0	0	0	.	.	0	.	0	0.967	0.855	0.587	0.543	.	0.956	0.277	0.5	1	1	0	0	15156.1	139	1	6.744	3	43	78	38	14	73	34	19	15	0.909	PEKR:[LIJVAP]X[KRTPEI]R:60-63,KR:[KR]R:62-63,IEKR:[LIJVAP]X[KRTPEI]R:65-68,KR:[KR]R:67-68	KYLT:2-5,RGIE:63-66,RDFG:68-71	0	0	0	SignalP3NN:18,SignalP4:18,SignalP5:18,DeepSig:18,SignalP6:18,SignalP3HMM:20,Phobius:20	1	1
XPS75386.1	2.611	5.725	3.3	.	.	.	.	0	0	0	.	.	0	.	0	0.906	0.852	.	0.699	.	0.049	0.444	0.47	1	1	0	0	14060.6	125	-4	4.516	6	46	72	31	23	75	21	9	12	1.103	VRTR:[LIJVAP]X[KRTPEI]R:37-40,AEPR:[LIJVAP]X[KRTPEI]R:112-115	RFYS:82-85	0	0	0	SignalP3NN:19,SignalP3HMM:19,SignalP4:19,SignalP5:19,DeepSig:19,Phobius:19,SignalP6:19	1	1
XPS80486.1	2.609	8.5	3.312	MoSPD5,MoBas4	.	.	.	0	0	0	.	.	0	.	0	1	0.908	0.503	0.988	.	0.01	0.534	0.69	1	1	0	0	11206.5	105	-4	4.522	6	41	66	32	10	60	23	10	13	0.926	KR:[KR]R:52-53	RVIG:69-72	0	0	0	Phobius:19,SignalP3NN:20,SignalP3HMM:20,SignalP4:20,SignalP5:20,DeepSig:20,SignalP6:20	1	1
XPS74657.1	2.599	6.709	3.312	.	.	.	.	0	0	0	.	.	0	.	0	1	0.914	0.831	0.66	.	0.907	0.392	0.6	1	1	0	0	7173.44	66	7	9.173	7	30	39	15	5	38	13	10	3	0.765	KR:[KR]R:55-56,KR:[KR]R:65-66	RGWY:50-53	0	0	0	SignalP3NN:17,SignalP3HMM:17,SignalP4:17,SignalP5:17,DeepSig:17,Phobius:17,SignalP6:17	1	1
XPS71925.1	2.595	4.24	3.276	.	.	.	.	0	0	0	PF07676	Repeat:PD40	0	.	0	0.9	0.856	.	.	0.526	0.995	0.599	0.38	1	1	0	0	17310.3	156	3	7.798	3	58	85	36	23	80	37	21	16	1.118	RR:[KR]R:54-55	RFLL:2-5,KGLK:45-48,RKLL:86-89,KSLI:130-133,RNIL:152-155	0	0	0	SignalP3NN:15,SignalP3HMM:15,SignalP4:15,DeepSig:15,Phobius:15,SignalP6:15,SignalP5:19	1	1
XPS81652.1	2.591	6.115	3.302	MoCDIP1	.	.	.	0	0	0	.	.	0	.	0	0.041	0.68	.	0.59	.	0.885	0.232	0.87	1	1	0	0	36322.5	354	5.5	8.715	6	155	238	111	19	194	56	31	25	0.911	LGIR:[LIJVAP]X[KRTPEI]R&LXXR:151-154,VSIR:[LIJVAP]X[KRTPEI]R:294-297,LAAR:LXXR:309-312	KIFE:88-91,RDIG:196-199,RDIS:319-322	0	1	0	SignalP3NN:19,SignalP3HMM:19,SignalP4:19,SignalP5:19,DeepSig:19,Phobius:19,SignalP6:19	1	1
XPS71502.1	2.587	7.257	3.233	VdPevD1	.	.	.	0	0	0	PF16541	Domain:AltA1	1	.	0	0.891	0.748	.	0.847	.	0.346	0.553	0.91	1	1	0	0	16113	154	-5.5	4.354	6	62	97	45	17	93	22	9	13	0.848	.	.	0	0	0	SignalP3NN:16,SignalP3HMM:16,SignalP5:16,DeepSig:16,Phobius:16,SignalP6:22,SignalP4:24	1	1
XPS70260.1	2.576	5.912	3.31	.	.	.	.	0	0	0	.	.	0	.	0	0.999	0.839	0.618	.	.	0.994	0.64	0.58	1	1	0	0	21561.2	203	5.5	8.329	10	78	131	38	17	109	46	26	20	0.8	LGLR:LXXR:28-31,RR:[KR]R:31-32,KR:[KR]R:52-53,RR:[KR]R:64-65,ITER:[LIJVAP]X[KRTPEI]R:78-81,PVKR:[LIJVAP]X[KRTPEI]R:91-94,KR:[KR]R:93-94,KR:[KR]R:130-131,KR:[KR]R:167-168	RFIL:2-5,HEFD:23-26,KELD:40-43,RCLD:65-68,RCFS:94-97,RCFS:131-134,RCFS:168-171	1	0	0	SignalP3HMM:17,SignalP4:17,SignalP5:17,SignalP6:17,DeepSig:21,Phobius:21,SignalP3NN:23	1	1
XPS75891.1	2.549	6.687	3.312	.	.	.	.	0	0	0	.	.	0	.	0	1	0.924	0.507	0.85	.	0.883	0.496	0.76	1	1	0	0	9215.75	89	3	7.96	10	42	55	28	7	60	13	8	5	0.643	ACKR:[LIJVAP]X[KRTPEI]R:40-43,KR:[KR]R:42-43	RNYE:51-54,KQID:56-59	0	0	0	SignalP3NN:17,SignalP3HMM:17,SignalP4:17,SignalP5:17,DeepSig:17,Phobius:17,SignalP6:17	1	1
XPS80719.1	2.533	0.574	-2.368	.	.	.	.	0	0	0	PF01105	Domain:EMP24_GP25L	0	.	0	0.936	0.929	0.642	.	.	0.7	0.468	0.25	0	1	0	1	24150.5	217	2	7.733	3	69	111	64	28	118	49	26	23	1.429	LTYR:LXXR:23-26,KR:[KR]R:181-182	RSFA:2-5,KVIL:76-79,KYFR:163-166,RNFS:171-174,KRIF:181-184,RFFF:206-209,KGIL:214-217	0	0	0	SignalP3NN:20,SignalP3HMM:20,SignalP4:20,SignalP5:20,DeepSig:20,Phobius:20,SignalP6:20	1	1
XPS76162.1	2.533	8.042	3.309	CfPDIP1	.	.	.	0	0	0	.	.	0	.	0	0.986	0.856	.	0.752	.	0.956	0.277	0.64	1	1	0	0	17486.6	160	-2	5.888	4	47	91	43	17	84	35	18	17	1.143	PEKR:[LIJVAP]X[KRTPEI]R:60-63,KR:[KR]R:62-63,IEKR:[LIJVAP]X[KRTPEI]R:65-68,KR:[KR]R:67-68	KYLT:2-5,RGIE:63-66,RDFG:68-71,KNFH:144-147	0	0	0	SignalP3NN:18,SignalP4:18,SignalP5:18,DeepSig:18,SignalP6:18,SignalP3HMM:20,Phobius:20	1	1
XPS75160.1	2.518	6.678	2.954	MoCDIP1	.	.	.	0	0	0	PF14592	Repeat:Chondroitinas_B	0	PL9_3,PL9,PL9_1,PL31,GH160	0	0.808	0.713	.	0.869	.	0.085	0.229	0.45	1	1	0	0	25800.7	237	-3	5.307	2	81	134	65	27	129	51	25	26	1.093	LGQR:LXXR:233-236	KDIY:19-22,RSYD:81-84,RGIL:111-114,KFYN:123-126,HNYY:143-146,RLWD:207-210	0	1	0	SignalP3NN:18,SignalP3HMM:18,SignalP4:18,SignalP5:18,DeepSig:18,Phobius:18,SignalP6:18	1	1
XPS79861.1	2.518	4.552	3.256	.	.	.	.	0	0	0	PF13924	Domain:Lipocalin_5	0	.	0	0.776	0.638	.	0.63	.	0.576	0.466	0.67	1	1	0	0	20372.2	190	5.5	9.56	0	65	114	63	20	112	34	21	13	0.83	RR:[KR]R:156-157	HPIL:5-8,RPIK:30-33,HSIG:114-117,RNYT:157-160,KKID:187-190	0	0	0	SignalP3NN:19,SignalP3HMM:19,SignalP4:19,SignalP5:19,DeepSig:19,Phobius:19,SignalP6:19	1	1
XPS76780.1	2.515	4.844	3.122	.	.	.	.	0	0	0	PF13472	Domain:Lipase_GDSL_2	0	CE3,CE2	0	0.901	0.704	.	0.626	.	0.444	0.257	0.68	1	1	0	0	26826.7	249	6.5	9.718	2	79	149	82	20	138	50	29	21	1.034	KR:[KR]R:152-153,AATR:[LIJVAP]X[KRTPEI]R:218-221,LSRR:[LIJVAP]X[KRTPEI]R&LXXR:240-243,RR:[KR]R:242-243	KVMP:25-28,RCWR:36-39,KAYD:123-126,KRWP:152-155,KQYA:170-173,KFFA:215-218,RRLA:242-245	0	0	0	SignalP3NN:20,SignalP3HMM:20,SignalP4:20,SignalP5:20,DeepSig:20,Phobius:20,SignalP6:20	1	1
XPS68226.1	2.499	5.749	3.312	.	.	.	.	0	0	0	.	.	0	.	0	0.994	0.823	.	0.832	.	0.059	0.429	0.84	1	1	0	0	11270.9	107	3.5	8.488	4	43	64	33	11	66	18	11	7	1	LGAR:LXXR:21-24	KFLA:2-5,KDIL:42-45,RCYN:54-57,KLYT:76-79	0	0	0	SignalP5:16,SignalP3NN:22,SignalP3HMM:22,SignalP4:22,DeepSig:22,Phobius:22,SignalP6:24	1	1
XPS75200.1	2.497	5.237	2.81	.	.	.	.	0	0	0	.	.	0	.	0	0.97	0.816	.	0.752	.	0.505	0.273	0.28	1	1	0	0	25243.3	232	-4	5.069	10	78	133	57	17	120	52	25	27	0.887	LHIR:[LIJVAP]X[KRTPEI]R&LXXR:17-20,LEGR:LXXR:21-24,LKRR:[LIJVAP]X[KRTPEI]R&LXXR:31-34,KR:[KR]R:32-33,PMTR:[LIJVAP]X[KRTPEI]R:147-150	HALH:15-18,KPIP:59-62,KDYC:120-123,RCLR:128-131,RGWA:150-153	0	0	0	SignalP3NN:16,SignalP3HMM:16,SignalP4:16,SignalP5:16,Phobius:16	1	1
XPS80631.1	2.493	6.726	3.2	.	.	.	.	0	0	0	.	.	0	.	0	1	0.948	0.522	0.857	.	0.986	0.441	0.56	1	1	0	0	10905.3	99	5.5	8.099	8	39	61	23	15	55	22	15	7	0.833	.	KKFI:3-6,RCWS:42-45,KELP:49-52,RPFA:76-79,HCIT:82-85	0	0	0	SignalP3NN:18,SignalP3HMM:18,SignalP4:18,SignalP5:18,DeepSig:18,Phobius:18,SignalP6:18	1	1
XPS80394.1	2.493	5.996	3.309	FgXYLA	.	.	.	0	0	0	PF00457	Domain:Glyco_hydro_11	1	GH11,CBM60	0	0.015	0.657	.	0.932	.	0.102	0.307	0.87	1	1	0	0	24544.9	230	3	8.957	0	99	147	58	31	123	28	16	12	1.035	LTAR:LXXR:36-39,RR:[KR]R:94-95,KR:[KR]R:182-183	KGWN:87-90,HNYQ:207-210	0	0	0	SignalP3NN:19,SignalP3HMM:19,SignalP4:19,SignalP5:19,Phobius:19,SignalP6:19,DeepSig:30	1	1
XPS71013.1	2.489	3.846	2.13	.	.	.	.	0	0	0	.	.	0	.	0	0.7	0.77	.	0.511	.	0.049	0.47	0.42	1	1	0	0	25216.5	230	0	6.441	9	83	139	66	23	126	49	25	24	0.804	LAPR:[LIJVAP]X[KRTPEI]R&LXXR:34-37,RR:[KR]R:37-38,PITR:[LIJVAP]X[KRTPEI]R:101-104,LVER:[LIJVAP]X[KRTPEI]R&LXXR:115-118,LQKR:[LIJVAP]X[KRTPEI]R&LXXR:135-138,KR:[KR]R:137-138	RDLC:38-41,RFIG:49-52,KNWC:74-77,KRYI:137-140,REIN:143-146,KWFR:153-156	0	0	0	SignalP3NN:25,SignalP3HMM:25,SignalP4:25,SignalP5:25,DeepSig:25,Phobius:25,SignalP6:25	1	1
XPS67814.1	2.489	7.555	2.972	UvHrip1,MoHrip2,PgShr9	.	.	.	0	0	0	.	.	0	.	0	0.981	0.766	0.59	0.763	.	0.978	0.472	0.46	1	1	0	0	21336.2	197	-2	5.903	10	72	112	52	21	110	45	23	22	0.909	PLKR:[LIJVAP]X[KRTPEI]R:182-185,KR:[KR]R:184-185	KFIL:4-7,KGLA:118-121,RSIT:185-188,RMIL:190-193	0	1	0	SignalP3NN:17,SignalP3HMM:17,SignalP4:17,SignalP5:19,DeepSig:19,SignalP6:19,Phobius:21	1	1
XPS75404.1	2.477	6.37	3.312	.	.	.	.	0	0	0	.	.	0	.	0	1	0.933	.	0.859	.	0.314	0.214	0.75	1	1	0	0	10558.4	100	5.5	8.311	8	36	62	30	7	61	17	12	5	0.8	.	HPIT:57-60	0	0	0	SignalP3NN:19,SignalP3HMM:19,SignalP4:19,SignalP5:19,DeepSig:19,Phobius:19,SignalP6:19	1	1
XPS71757.1	2.475	2.564	2.38	CfTom1	.	.	.	0	0	0	PF11790	Family:Glyco_hydro_cc	0	GH128	0	0.124	0.621	.	.	0.78	0.022	0.362	0.68	1	1	0	0	31370.3	281	1.5	6.762	4	92	153	71	45	158	66	36	30	1.091	LTTR:[LIJVAP]X[KRTPEI]R&LXXR:26-29,PHRR:[LIJVAP]X[KRTPEI]R:37-40,RR:[KR]R:39-40	HVLL:5-8,KYIK:48-51,KWYG:94-97,HLLG:112-115,KQYM:141-144,KSLK:148-151,KMYL:153-156,RGLS:166-169,HWYD:189-192,KHIE:202-205,RPIW:214-217,KAFM:231-234,HRYA:248-251	0	0	0	SignalP3NN:20,SignalP3HMM:20,SignalP4:20,SignalP5:20,DeepSig:20,Phobius:20,SignalP6:20	1	1
XPS68171.1	2.474	3.683	3.123	.	.	.	.	0	0	0	PF00544	Repeat:Pectate_lyase_4	0	PL1_7,PL1,PL1_9,PL1_10,PL1_5,PL1_6,PL1_3,PL1_8,PL1_4,PL1_1,PL1_12,PL1_11,PL1_13,PL1_2	0	0.067	0.657	.	0.604	.	0.032	0.616	0.84	1	1	0	0	34658.8	327	3	7.171	2	122	201	101	33	170	69	38	31	1.275	KR:[KR]R:28-29,IEKR:[LIJVAP]X[KRTPEI]R:31-34,KR:[KR]R:33-34,LNSR:LXXR:222-225,INTR:[LIJVAP]X[KRTPEI]R:248-251	RGIE:29-32,KSII:101-104,RNFA:128-131,KDYY:164-167,HFYN:235-238,KSLY:268-271	0	0	0	SignalP3NN:18,SignalP3HMM:18,SignalP4:18,SignalP5:18,DeepSig:18,Phobius:18,SignalP6:34	1	1
XPS72783.1	2.472	8.666	3.272	.	.	.	.	0	0	0	PF03211	Repeat:Pectate_lyase	1	PL3_2,PL3,PL3_4,PL3_5,PL3_1,PL3_3	0	1	0.905	0.615	0.967	.	0.89	0.304	0.83	1	1	0	0	25099.4	236	7.5	8.162	13	95	141	62	28	139	52	31	21	1.065	KR:[KR]R:176-177	KVFD:46-49,KIIQ:141-144,KLYR:163-166	0	0	0	SignalP3NN:19,SignalP3HMM:19,SignalP4:19,SignalP5:19,DeepSig:19,Phobius:19,SignalP6:19	1	1
XPS78753.1	2.472	2.16	3.201	.	.	.	.	0	0	0	PF18271	Domain:GH131_N	0	GH131	0	0.081	0.665	.	.	0.556	0.212	0.421	0.79	1	1	0	0	31947.9	293	4.5	8.401	2	94	166	82	36	158	55	31	24	1.159	RR:[KR]R:113-114	KSIF:103-106,KGIK:130-133,RPLN:145-148,HEYL:151-154,KILD:187-190,KQIW:194-197,KKWQ:204-207	0	0	0	SignalP3NN:18,SignalP3HMM:18,SignalP4:18,SignalP5:18,DeepSig:18,Phobius:18,SignalP6:18	1	1
XPS68127.1	2.464	2.906	3.195	.	.	.	.	0	0	0	PF01341	Domain:Glyco_hydro_6	0	GH6	0	0.946	0.667	.	.	0.606	0.228	0.487	0.59	1	1	0	0	20337.3	191	5	9.458	1	68	114	74	17	116	34	20	14	0.789	PQPR:[LIJVAP]X[KRTPEI]R:41-44,LDTR:[LIJVAP]X[KRTPEI]R&LXXR:94-97,LPDR:LXXR:129-132	HSLA:67-70,KLMA:119-122	0	0	0	SignalP3NN:19,SignalP3HMM:19,SignalP4:19,SignalP5:19,DeepSig:19,Phobius:19,SignalP6:19	1	1
XPS81365.1	2.464	4.324	3.237	MoCDIP4,ChNIS1,CoNIS1	.	.	.	0	0	0	PF03443	Family:AA9	1	AA9	0	0.192	0.616	.	.	0.513	0.99	0.657	0.65	1	1	0	0	29310.4	271	6.5	9.002	2	95	155	77	41	170	49	29	20	0.925	.	RFIS:2-5,RLIV:24-27,RALG:39-42,KTYS:72-75,KIYE:119-122,KTYA:126-129,KTFD:143-146,KDIE:151-154,KVYP:232-235	0	0	0	SignalP3NN:18,SignalP3HMM:18,SignalP4:18,SignalP5:18,DeepSig:18,Phobius:18,SignalP6:18	1	1
XPS77173.1	2.459	6.68	3.312	.	.	.	.	0	0	0	.	.	0	.	0	1	0.912	0.697	0.729	.	0.973	0.383	0.82	1	1	0	0	10682.4	103	5	8.306	8	49	64	34	7	61	20	13	7	0.7	LEAR:LXXR:34-37	HSIL:4-7,KTWS:54-57,KCIR:74-77	0	0	0	SignalP3NN:17,SignalP4:17,SignalP5:17,DeepSig:17,Phobius:17,SignalP6:17,SignalP3HMM:19	1	1
XPS74744.1	2.452	6.179	3.312	.	.	.	.	0	0	0	.	.	0	.	0	1	0.883	.	0.811	.	0.731	0.561	0.83	1	1	0	0	7349.33	69	3.5	7.649	6	31	43	17	10	39	14	10	4	0.882	LGCR:LXXR:62-65	RLLA:4-7,HGYC:48-51,RNIC:65-68	0	0	0	SignalP3NN:17,SignalP3HMM:17,SignalP4:17,SignalP5:17,DeepSig:17,Phobius:17,SignalP6:17	1	1
XPS77318.1	2.443	6.018	3.288	.	.	.	.	0	0	0	.	.	0	.	0	0.982	0.794	0.613	0.813	.	0.823	0.527	0.8	1	1	0	0	20855.2	195	-4.5	4.809	8	73	128	53	16	98	43	20	23	1.067	AGER:[LIJVAP]X[KRTPEI]R:91-94	HKWK:115-118,KPII:154-157,RKLS:164-167	0	0	0	SignalP3NN:17,SignalP4:17,SignalP5:17,Phobius:17,SignalP6:17,SignalP3HMM:20,DeepSig:20	1	1
XPS71416.1	2.443	4.983	2.254	.	.	.	.	0	0	0	PF00254	Domain:FKBP_C	0	.	0	0.982	0.834	0.576	0.507	.	0.678	0.432	0.37	1	1	0	0	14476.5	136	0.5	6.71	2	49	77	42	12	76	32	17	15	0.882	KR:[KR]R:35-36,KR:[KR]R:94-95	KTIN:17-20,KGWD:80-83,RKLT:95-98	1	0	0	SignalP3NN:15,SignalP3HMM:15,SignalP4:15,SignalP5:15,DeepSig:15,Phobius:15,SignalP6:15	1	1
XPS78461.1	2.442	6.113	2.638	.	.	.	.	0	0	0	PF09044	Domain:Kp4	0	.	0	1	0.918	0.907	0.684	.	0.949	0.316	0.43	1	1	0	0	20617.7	191	0	6.45	13	66	109	47	13	105	48	25	23	1.19	LNCR:LXXR:48-51	RDYV:68-71,RKME:182-185	0	0	0	SignalP3HMM:21,SignalP5:21,Phobius:21,SignalP6:21,SignalP3NN:27,SignalP4:27,DeepSig:27	1	1
XPS68883.1	2.44	7.042	3.27	UvHrip1,MoHrip2,PsOPEL,PgShr9	.	.	.	0	0	0	PF04681	Family:Bys1	0	.	0	0.711	0.714	.	0.87	.	0.777	0.563	0.85	1	1	0	0	20167.7	188	-2	5.508	10	77	116	48	24	109	28	14	14	0.93	KR:[KR]R:139-140	KSLL:5-8,RAIV:21-24,RTLR:111-114,HCLP:155-158,HCIG:177-180	0	0	0	SignalP3NN:18,SignalP3HMM:18,SignalP4:18,SignalP5:18,DeepSig:18,Phobius:18,SignalP6:18	1	1
XPS70240.1	2.437	6.322	3.312	.	.	.	.	0	0	0	.	.	0	.	0	1	0.922	.	0.961	.	0.096	0.398	0.77	1	1	0	0	9490.8	93	-1	4.853	8	41	62	30	2	56	15	7	8	0.577	KR:[KR]R:26-27,ALER:[LIJVAP]X[KRTPEI]R:87-90	KRIC:26-29,RALE:86-89	0	0	0	SignalP3NN:18,SignalP3HMM:18,SignalP4:18,SignalP5:18,DeepSig:18,Phobius:18,SignalP6:18	1	1
XPS79993.1	2.436	5.901	3.312	.	.	.	.	0	0	0	PF02015	Domain:Glyco_hydro_45	0	GH45	0	0.986	0.849	.	0.773	.	0.356	0.238	0.9	1	1	0	0	23948.1	228	4.5	7.976	14	102	148	53	22	130	41	23	18	0.787	KR:[KR]R:226-227	RYWD:30-33,KKMV:125-128	0	1	0	SignalP3NN:21,SignalP3HMM:21,SignalP4:21,SignalP5:21,DeepSig:21,Phobius:21,SignalP6:21	1	1
XPS78348.1	2.429	5.557	3.311	.	.	.	.	0	0	0	.	.	0	.	0	0.937	0.81	.	0.608	.	0.275	0.422	0.57	1	1	0	0	13657.6	123	6.5	9.008	6	49	69	28	18	72	23	15	8	0.963	KR:[KR]R:31-32,LGAR:LXXR:117-120	KFWV:2-5,RSIA:32-35,RDMP:58-61,KEFG:108-111	0	1	0	SignalP3NN:17,SignalP3HMM:17,SignalP4:17,SignalP5:17,DeepSig:17,Phobius:17,SignalP6:17	1	1
XPS81719.1	2.42	4.283	3.271	.	.	.	.	0	0	0	PF14273	Family:DUF4360	0	.	0	0.293	0.678	.	0.848	.	0.026	0.195	0.9	1	1	0	0	22509.4	212	1.5	7.617	4	82	131	57	19	117	36	19	17	0.922	.	KWLL:2-5,RGYA:105-108,KGIS:112-115	0	0	0	SignalP4:13,SignalP6:13,SignalP3NN:16,SignalP3HMM:16,SignalP5:16,DeepSig:16,Phobius:22	1	1
XPS76719.1	2.405	6.168	3.312	.	.	.	.	0	0	0	.	.	0	.	0	1	0.887	.	0.893	.	0.373	0.457	0.82	1	1	0	0	10688.1	102	1.5	7.369	10	47	65	24	9	62	18	10	8	0.714	LESR:LXXR:24-27	RQLG:56-59,HKYC:70-73	0	0	0	SignalP3NN:19,SignalP3HMM:19,SignalP4:19,SignalP5:19,DeepSig:19,Phobius:19,SignalP6:27	1	1
XPS78346.1	2.39	6.703	3.312	.	.	.	.	0	0	0	.	.	0	.	0	1	0.892	0.855	0.904	.	0.757	0.41	0.49	1	1	0	0	20750.7	196	2.5	7.073	22	82	127	43	16	113	51	28	23	0.686	.	KALL:6-9,KGFW:94-97,KAFC:115-118,KLYS:131-134	0	0	0	SignalP3NN:18,SignalP4:18,DeepSig:18,SignalP3HMM:21,SignalP5:21,Phobius:21,SignalP6:21	1	1
XPS68486.1	2.382	6.99	3.26	MoCDIP4,ChNIS1,CoNIS1	.	.	.	0	0	0	PF03443	Family:AA9	1	AA9,AA11	0	0.443	0.795	.	0.794	.	0.073	0.287	0.79	1	1	0	0	25872.3	247	7	9.078	4	91	154	75	22	145	41	25	16	0.814	VGIR:[LIJVAP]X[KRTPEI]R:35-38	HTIA:18-21,KVIP:67-70,HVIG:83-86,KWFK:125-128,RMIS:144-147	0	0	0	SignalP5:17,Phobius:19,SignalP3NN:21,SignalP3HMM:21,SignalP4:21,DeepSig:21,SignalP6:23	1	1
XPS71387.1	2.354	3.663	3.3	.	.	.	.	0	0	0	.	.	0	CBM13	0	0.066	0.584	.	0.944	.	0.024	0.695	0.8	1	1	0	0	18155.1	171	1	8.274	0	71	105	44	22	94	17	9	8	1.268	PPTR:[LIJVAP]X[KRTPEI]R:50-53,IDIR:[LIJVAP]X[KRTPEI]R:134-137	KGMD:29-32,RQLL:144-147	0	1	0	SignalP3NN:19,SignalP3HMM:19,SignalP4:19,SignalP5:19,DeepSig:19,Phobius:19,SignalP6:19	1	1
XPS77997.1	2.343	2.488	3.07	.	.	.	.	0	0	0	.	.	0	.	0	0.302	0.735	.	.	0.657	0.916	0.279	0.48	1	1	0	0	25635.2	235	-3.5	5.771	9	83	134	65	23	127	53	27	26	0.88	LKSR:LXXR:185-188	KILS:2-5,KALA:59-62,RGYR:134-137,KHWT:152-155,KKLH:209-212,RAMA:224-227	0	0	0	SignalP3NN:21,SignalP3HMM:21,SignalP4:21,SignalP5:21,DeepSig:21,Phobius:21,SignalP6:21	1	1
XPS70129.1	2.343	5.444	3.312	.	.	.	.	0	0	0	.	.	0	.	0	0.945	0.74	.	0.793	.	0.95	0.489	0.85	1	1	0	0	11284.8	105	3	7.723	4	39	62	32	14	64	17	11	6	0.786	.	KGFY:2-5,RNII:37-40	0	0	0	SignalP3NN:19,SignalP3HMM:19,SignalP4:19,SignalP5:19,DeepSig:19,Phobius:19,SignalP6:19	1	1
XPS68765.1	2.343	6.284	2.931	SsCP1,MoMSP1	.	.	.	0	0	0	.	.	0	.	0	0.347	0.75	.	0.706	.	0.019	0.455	0.57	1	1	0	0	26427.4	245	4	7.836	8	87	148	70	22	141	46	26	20	0.983	ALPR:[LIJVAP]X[KRTPEI]R:21-24,LPRR:LXXR:22-25,RR:[KR]R:24-25,LTTR:[LIJVAP]X[KRTPEI]R&LXXR:35-38	KNYL:32-35,KTLK:112-115,KTIN:121-124,KDIL:145-148,KKYV:161-164,RCLR:188-191	0	1	0	SignalP3NN:21,SignalP3HMM:21,SignalP4:21,SignalP5:21,DeepSig:21,Phobius:21,SignalP6:21	1	1
XPS68682.1	2.332	6.635	3.312	.	.	.	.	0	0	0	.	.	0	.	0	1	0.926	0.566	0.64	.	0.949	0.475	0.45	1	1	0	0	17217.3	162	-1.5	5.971	14	70	98	41	19	99	39	20	19	0.52	LSAR:LXXR:18-21	RQWE:62-65,KGYC:104-107	0	0	0	SignalP3NN:19,SignalP3HMM:19,SignalP4:19,SignalP5:19,DeepSig:19,Phobius:19,SignalP6:19	1	1
XPS73359.1	2.329	7.831	3.188	VdPevD1	.	.	.	0	0	0	PF16541	Domain:AltA1	1	.	0	0.885	0.813	0.56	0.853	.	0.433	0.472	0.72	1	1	0	0	17056.1	156	-5	4.385	5	55	90	44	18	88	29	12	17	1.057	LEAR:LXXR:22-25,LLLR:LXXR:104-107	KVIA:4-7,RKLD:47-50,KTIS:52-55,KFYQ:83-86	0	0	0	SignalP3NN:19,SignalP3HMM:19,SignalP4:19,SignalP5:19,DeepSig:19,Phobius:24,SignalP6:25	1	1
XPS73666.1	2.329	5.487	3.213	VdPDA1,PesCDA	.	.	.	0	0	0	PF01522	Family:Polysacc_deac_1	1	CE4,CBM18	0	0.001	0.596	.	0.776	.	0.021	0.609	0.82	1	1	0	0	39923.4	372	-2.5	6.111	12	147	230	97	44	202	79	41	38	0.956	LKSR:LXXR:35-38,LEAR:LXXR:44-47,LNAR:LXXR:61-64,VIKR:[LIJVAP]X[KRTPEI]R:197-200,KR:[KR]R:199-200	RDLK:33-36,RDLL:38-41,KDYT:157-160,HVLD:162-165,KTYN:168-171,KRMD:199-202,HQIA:206-209,HTWT:211-214,RNIV:238-241,KDMA:263-266,KNYF:294-297,HDIH:318-321	0	0	0	SignalP3NN:18,SignalP3HMM:18,SignalP4:18,Phobius:18,SignalP6:18,SignalP5:20	1	1
XPS80339.1	2.326	6.04	3.158	MoMSP1,SsCP1,VdAve1	.	.	.	0	0	0	PF07249	Family:Cerato-platanin	1	CBM82	0	0.54	0.583	.	0.879	.	0.439	0.5	0.96	1	1	0	0	14391	138	-1	5.566	4	63	87	41	15	80	18	9	9	0.842	.	RALT:32-35,HGWN:50-53,KTIY:89-92	0	0	0	SignalP3NN:18,SignalP3HMM:18,SignalP4:18,SignalP5:18,DeepSig:18,SignalP6:18,Phobius:20	1	1
XPS69597.1	2.322	6.757	3.312	.	.	.	.	0	0	0	PF03211	Repeat:Pectate_lyase	1	PL3_2,PL3,PL3_4,PL3_5,PL3_1,PL3_3	0	0.658	0.701	.	0.752	.	0.032	0.619	0.99	1	1	0	0	26434.5	257	4.5	7.769	10	119	172	69	21	135	51	29	22	0.897	.	KTIA:50-53,KQWD:63-66,HCLG:107-110,KVLQ:149-152,KNFY:162-165,KLYR:171-174,KQYA:181-184,KTLS:237-240	0	0	0	SignalP3NN:17,SignalP3HMM:17,SignalP4:17,SignalP5:17,DeepSig:17,Phobius:27,SignalP6:27	1	1
XPS77593.1	2.306	5.902	2.638	CfPDIP1	.	.	.	0	0	0	.	.	0	.	0	0.889	0.604	.	0.851	.	0.15	0.62	0.59	1	1	0	0	14805.6	135	-4	4.459	5	44	79	44	16	75	23	10	13	1.583	.	RSLP:2-5,HDIG:73-76,HSLR:123-126	0	0	0	SignalP6:14,SignalP3NN:21,SignalP3HMM:21,SignalP4:21,SignalP5:21,DeepSig:21,Phobius:21	1	1
XPS77140.1	2.305	6.65	3.174	SnTox267,PnTox3,SnTox5	.	.	.	0	0	0	.	.	0	.	0	0.567	0.69	.	0.722	.	0.991	0.328	0.6	1	1	0	0	24815.1	224	6	8.17	7	77	132	62	26	116	41	25	16	1.15	LSKR:[LIJVAP]X[KRTPEI]R&LXXR:70-73,KR:[KR]R:72-73,AGRR:[LIJVAP]X[KRTPEI]R:215-218,RR:[KR]R:217-218	REYS:41-44,KELD:46-49,HFLR:92-95,RIIN:102-105,HNFC:145-148,HVFS:173-176	0	1	1	SignalP3NN:18,SignalP3HMM:18,SignalP4:18,SignalP5:18,DeepSig:18,Phobius:18,SignalP6:18	1	1
XPS80409.1	2.305	4.65	3.03	.	.	.	.	0	0	0	.	.	0	.	0	0.535	0.777	.	0.597	.	0.008	0.567	0.43	1	1	0	0	24370.4	222	0	6.473	4	76	128	58	28	125	38	20	18	0.906	RR:[KR]R:78-79,LFGR:LXXR:152-155	HTFA:16-19,RFFM:73-76,RQMQ:79-82,KALE:161-164	0	0	1	SignalP3NN:19,SignalP3HMM:19,SignalP4:19,SignalP5:19,DeepSig:19,Phobius:19,SignalP6:19	1	1
XPS68896.1	2.304	4.21	3.309	.	.	.	.	0	0	0	.	.	0	.	0	0.999	0.915	.	.	0.649	0.244	0.263	0.44	1	1	0	0	14065.4	123	1	6.798	10	38	62	34	13	70	29	16	13	1.389	IVTR:[LIJVAP]X[KRTPEI]R:42-45,LGPR:[LIJVAP]X[KRTPEI]R&LXXR:81-84	KLLS:2-5,HLWH:51-54,RWLT:65-68,KWMF:69-72	0	0	0	SignalP3NN:15,SignalP3HMM:15,SignalP4:15,SignalP5:15,DeepSig:15,Phobius:15	1	1
XPS75221.1	2.299	1.254	2.854	.	.	.	.	0	0	0	PF07519	Family:Tannase	0	.	0	0.049	0.611	.	.	0.675	0.415	0.324	0.82	1	1	0	0	32188.4	300	4.5	8.019	9	116	180	87	34	168	60	33	27	1.099	LAFR:LXXR:28-31,LGGR:LXXR:188-191,LSSR:LXXR:291-294	KCLA:26-29,RFLA:101-104,RSLH:157-160,KYLA:167-170,KKLY:171-174,KSYY:180-183,RFFT:225-228,KTWI:245-248	0	0	0	SignalP3NN:19,SignalP3HMM:19,SignalP4:19,SignalP5:19,Phobius:19,SignalP6:19,DeepSig:22	1	1
XPS80754.1	2.299	5.878	3.276	MoCDIP4,CoNIS1,ChNIS1,MoNIS1	.	.	.	0	0	0	PF03443	Family:AA9	1	AA9	0	0.106	0.637	.	0.812	.	0.029	0.535	0.86	1	1	0	0	25941.5	241	3.5	7.409	4	85	145	65	29	137	43	25	18	0.967	AVTR:[LIJVAP]X[KRTPEI]R:142-145,PGPR:[LIJVAP]X[KRTPEI]R:234-237	HTIF:17-20,KDII:68-71,HTLD:85-88,KWFK:126-129,RLYN:145-148,KCIQ:159-162,RPFT:237-240	0	0	0	SignalP3NN:16,SignalP3HMM:16,SignalP4:16,SignalP5:16,DeepSig:16,Phobius:16,SignalP6:16	1	1
XPS74016.1	2.295	4.515	2.911	.	.	.	.	0	0	0	.	.	0	.	0	0.798	0.708	.	0.727	.	0.01	0.434	0.8	1	1	0	0	20911.2	192	-6	4.488	6	70	118	56	20	108	37	16	21	0.889	VHER:[LIJVAP]X[KRTPEI]R:40-43,KR:[KR]R:68-69	RTYL:30-33,RDIV:57-60,RIWD:71-74	0	0	0	SignalP5:17,SignalP6:17,SignalP3NN:21,SignalP3HMM:21,SignalP4:21,DeepSig:21,Phobius:21	1	1
XPS68352.1	2.292	4.303	3.301	.	.	.	.	0	0	0	.	.	0	.	0	0.532	0.622	.	0.828	.	0.232	0.478	0.59	1	1	0	0	20852.1	196	-4	4.564	5	81	121	52	18	104	32	14	18	0.918	.	RIMT:37-40,RAIK:181-184	0	0	0	SignalP3NN:18,SignalP3HMM:18,SignalP4:18,SignalP5:18,DeepSig:18,Phobius:18,SignalP6:23	1	1
XPS81823.1	2.289	5.803	3.311	FgXYLA	.	.	.	0	0	0	PF00457	Domain:Glyco_hydro_11	1	GH11	0	0.073	0.597	.	0.91	.	0.396	0.308	0.87	1	1	0	0	23783.1	224	3	7.876	2	94	149	55	28	114	31	18	13	1.102	LVRR:[LIJVAP]X[KRTPEI]R&LXXR:40-43,RR:[KR]R:42-43,KR:[KR]R:174-175	KGWS:79-82,RNIN:87-90,HNYQ:200-203	0	1	0	SignalP3HMM:19,SignalP4:19,SignalP5:19,DeepSig:19,Phobius:19,SignalP6:19,SignalP3NN:25	1	1
XPS75287.1	2.275	6.587	3.221	.	.	.	.	0	0	0	PF03211	Repeat:Pectate_lyase	1	PL3_2,PL3,PL3_4,PL3_5,PL3_1,PL3_3	0	0.616	0.68	.	0.796	.	0.263	0.356	0.96	1	1	0	0	26342.4	256	0.5	6.61	10	117	168	72	21	136	51	27	24	0.868	IHKR:[LIJVAP]X[KRTPEI]R:31-34,KR:[KR]R:33-34	KTYG:63-66,KVIQ:147-150,KLYR:169-172,KLLV:196-199	0	0	0	SignalP3NN:18,SignalP3HMM:18,SignalP4:18,SignalP5:18,DeepSig:18,Phobius:18,SignalP6:18	1	1
XPS75629.1	2.258	2.564	2.658	.	.	.	.	0	0	0	.	.	0	.	0	0.773	0.715	.	.	0.582	0.565	0.531	0.34	1	1	0	0	23297.5	217	2.5	8.023	1	80	121	74	22	120	46	25	21	1.062	VAIR:[LIJVAP]X[KRTPEI]R:34-37,ITER:[LIJVAP]X[KRTPEI]R:62-65,LAKR:[LIJVAP]X[KRTPEI]R&LXXR:73-76,KR:[KR]R:75-76,KR:[KR]R:85-86,VIKR:[LIJVAP]X[KRTPEI]R:161-164,KR:[KR]R:163-164	KTWM:7-10,RVIT:60-63,KRYL:75-78,RTIQ:86-89,HGIA:97-100,KQLK:138-141,HAFV:144-147	0	0	0	SignalP3NN:24,SignalP3HMM:24,SignalP4:24,SignalP5:24,DeepSig:24,Phobius:24,SignalP6:24	1	1
XPS76617.1	2.257	5.587	3.312	.	.	.	.	0	0	0	.	.	0	.	0	0.924	0.81	.	0.685	.	0.289	0.446	0.7	1	1	0	0	10370.8	97	2.5	8.009	5	39	58	26	13	63	13	8	5	0.759	.	KAFG:2-5,HALG:55-58,RGLS:77-80	0	0	0	SignalP3NN:19,SignalP3HMM:19,SignalP4:19,SignalP5:19,DeepSig:19,Phobius:19,SignalP6:19	1	1
XPS72022.1	2.256	4.511	2.344	.	.	.	.	0	0	0	PF01083	Domain:Cutinase	1	CE5	0	0.955	0.703	.	.	0.551	0.874	0.288	0.48	1	1	0	0	26391.3	253	6	9.125	4	95	144	91	13	150	51	29	22	0.716	VEIR:[LIJVAP]X[KRTPEI]R:21-24,KR:[KR]R:73-74,KR:[KR]R:230-231	RQLG:24-27,KEFS:36-39,RDIL:44-47,REFG:74-77,KKLM:106-109,RAIE:139-142,KIIC:179-182	1	0	0	SignalP3NN:18,SignalP3HMM:18,SignalP4:18,SignalP5:18,DeepSig:18,SignalP6:18,Phobius:23	1	1
XPS69938.1	2.216	4.418	3.312	.	.	.	.	0	0	0	.	.	0	.	0	0.777	0.6	.	0.673	.	0.463	0.308	0.49	1	1	0	0	10222.6	94	3	9.202	1	34	55	27	7	44	18	11	7	1.353	LGER:[LIJVAP]X[KRTPEI]R&LXXR:20-23	KTLI:2-5,RMFS:81-84,HAIR:88-91	0	0	0	SignalP3NN:16,SignalP3HMM:16,SignalP4:16,SignalP5:16,DeepSig:16,Phobius:16,SignalP6:23	1	1
XPS71015.1	2.213	6.49	3.312	.	.	.	.	0	0	0	.	.	0	.	0	0.998	0.869	0.741	0.792	.	0.843	0.518	0.65	1	1	0	0	11639	107	-0.5	6.311	4	37	57	29	14	58	26	14	12	1.12	.	RDIH:43-46,KGIG:54-57,HNIN:59-62	0	0	0	SignalP3NN:17,SignalP3HMM:17,SignalP4:17,SignalP5:17,DeepSig:17,Phobius:17,SignalP6:17	1	1
XPS73073.1	2.213	7.504	3.214	.	.	.	.	0	0	0	PF03211	Repeat:Pectate_lyase	1	PL3_2,PL3,PL3_5,PL3_4,PL3_1,PL3_3	0	0.971	0.789	.	0.901	.	0.114	0.478	0.95	1	1	0	0	25720	247	3.5	7.872	12	110	160	67	19	138	50	27	23	0.94	.	KLIP:37-40,KIFQ:137-140,KNFY:150-153,KVIR:159-162,RNII:174-177,KKLG:227-230	0	0	0	SignalP4:17,SignalP5:17,Phobius:17,SignalP3NN:23,SignalP3HMM:23,DeepSig:23,SignalP6:23	1	1
XPS69058.1	2.213	5.526	3.3	.	.	.	.	0	0	0	.	.	0	.	0	0.928	0.77	.	0.83	.	0.666	0.346	0.93	1	1	0	0	12553.3	120	1	7.466	6	53	78	41	9	72	19	10	9	0.676	.	KSFK:27-30,KDLL:101-104	0	0	0	SignalP3NN:19,SignalP3HMM:19,SignalP4:19,SignalP5:19,DeepSig:19,Phobius:19,SignalP6:19	1	1
XPS77137.1	2.206	6.352	3.312	.	.	.	.	0	0	0	.	.	0	.	0	1	0.903	.	0.858	.	0.978	0.531	0.68	1	1	0	0	7636.14	72	2	7.52	7	26	42	22	6	50	11	7	4	0.579	.	RELL:66-69	0	0	0	SignalP3NN:18,SignalP3HMM:18,SignalP4:18,SignalP5:18,DeepSig:18,Phobius:18,SignalP6:18	1	1
XPS73088.1	2.203	8.279	3.214	.	.	.	.	0	0	0	PF03211	Repeat:Pectate_lyase	1	PL3_2,PL3,PL3_4,PL3_5,PL3_1,PL3_3	0	0.971	0.861	0.614	0.779	.	0.961	0.502	0.83	1	1	0	0	26064.9	256	12	9.144	11	112	165	83	18	154	51	32	19	0.886	KR:[KR]R:33-34	KTYG:63-66,KLYR:169-172,KAYN:191-194,KLLA:196-199	0	0	0	SignalP3NN:18,SignalP4:18,SignalP3HMM:23,SignalP5:23,DeepSig:23,Phobius:23,SignalP6:23	1	1
XPS77763.1	2.2	2.779	0.674	.	.	.	.	0	0	0	PF01105	Domain:EMP24_GP25L	0	.	0	0.898	0.788	0.707	.	.	0.068	0.318	0.04	1	1	0	0	24666	219	3	7.162	3	63	108	69	28	112	59	33	26	1.051	LNSR:LXXR:155-158,RR:[KR]R:163-164	HFFI:20-23,KCFF:29-32,KSFQ:55-58,HRIV:77-80,HRIC:100-103,RAFF:210-213	0	0	0	SignalP3NN:18,SignalP3HMM:18,SignalP4:18,SignalP5:18,DeepSig:18,Phobius:18,SignalP6:18	1	1
XPS72629.1	2.199	5.648	2.776	MoCDIP1	.	.	.	0	0	0	PF00544	Repeat:Pectate_lyase_4	0	PL1,PL1_5,PL1_12,PL1_7,PL1_9,PL1_4,PL1_1,PL1_10,PL1_11,PL1_6,PL1_13,PL1_2,PL1_3,PL1_8	0	0.138	0.68	.	0.617	.	0.626	0.529	0.73	1	1	0	0	35384.5	321	0	6.492	5	107	182	88	41	169	72	38	34	1.394	LIIR:[LIJVAP]X[KRTPEI]R&LXXR:66-69,RR:[KR]R:165-166	HGFA:30-33,RTYA:57-60,KGYE:79-82,KTII:89-92,RNII:111-114,RNLQ:116-119,KALG:183-186,HMYN:221-224,HSYY:247-250,KMLD:279-282,RVFK:287-290	0	0	0	SignalP3NN:17,SignalP3HMM:17,SignalP4:17,SignalP5:17,DeepSig:17,Phobius:17,SignalP6:17	1	1
XPS73828.1	2.195	1.785	-1.124	.	.	.	.	0	0	0	.	.	0	.	0	0.996	0.898	.	0.652	.	0.988	0.541	0.59	0	1	0	1	15642.2	139	8.5	9.122	8	49	75	36	17	76	29	19	10	1.25	RR:[KR]R:2-3,LELR:LXXR:51-54,LRPR:[LIJVAP]X[KRTPEI]R:53-56,RR:[KR]R:126-127	RRYL:2-5,KPML:48-51,RQFC:67-70,KVLT:83-86,RPWV:117-120	0	1	0	SignalP3NN:20,SignalP3HMM:20,SignalP4:20,SignalP5:20,DeepSig:20,Phobius:20,SignalP6:20	1	1
XPS77565.1	2.195	5.004	3.297	MoHTR1,PIIN_08944,MoHTR2	.	.	.	0	0	0	PF00096	Domain:zf-C2H2	0	.	0	0.933	0.681	.	.	0.626	0.174	0.479	0.42	1	1	0	0	29494.1	260	9.5	7.828	11	75	141	62	38	126	67	42	25	1.256	RR:[KR]R:3-4,KR:[KR]R:154-155,RR:[KR]R:242-243,RR:[KR]R:251-252	RRLV:3-6,RCFD:46-49,KAFD:172-175,RHLK:182-185,KDLI:208-211,HVYG:230-233	0	0	0	SignalP3NN:20,SignalP3HMM:20,SignalP4:20,SignalP5:20,DeepSig:20,Phobius:20,SignalP6:20	1	1
XPS77077.1	2.182	0.97	0.139	.	.	.	.	0	0	0	PF01105	Domain:EMP24_GP25L	0	.	0	0.351	0.629	0.832	.	.	0.097	0.516	0.14	1	1	1	0	23380.2	203	-0.5	6.408	2	53	92	53	33	101	58	31	27	1.438	IHER:[LIJVAP]X[KRTPEI]R:76-79,VRER:[LIJVAP]X[KRTPEI]R:155-158,KR:[KR]R:194-195,KR:[KR]R:200-201	HNIQ:22-25,REFG:53-56,RGYQ:72-75,HSFD:86-89,HGIV:117-120,RQLS:137-140,KWWS:172-175,KRFF:194-197	0	0	0	SignalP3NN:21,SignalP3HMM:21,SignalP4:21,SignalP5:21,DeepSig:21,Phobius:21,SignalP6:21	1	1
XPS72538.1	2.177	7.79	3.228	PpCBEL	.	.	.	0	0	0	.	.	0	.	0	0.997	0.767	0.819	0.783	.	0.147	0.429	0.16	1	1	0	0	26786.5	239	2.5	7.153	14	74	128	62	26	128	67	36	31	1.265	PSKR:[LIJVAP]X[KRTPEI]R:78-81,KR:[KR]R:80-81,KR:[KR]R:161-162,RR:[KR]R:226-227	REIL:28-31,RCII:81-84,KDIS:90-93,KKLY:152-155,KRYI:161-164,KDFC:208-211,HVLP:216-219	0	0	0	SignalP3NN:21,SignalP3HMM:21,SignalP4:21,SignalP5:21,DeepSig:21,Phobius:21,SignalP6:21	1	1
XPS78257.1	2.17	6.088	2.827	PsGIP2,PsGIP1	.	.	.	0	0	0	PF00089	Domain:Trypsin	0	.	0	0.839	0.637	.	0.646	.	0.072	0.436	0.87	1	1	0	0	26107	251	3.5	7.641	6	97	161	87	22	152	46	26	20	0.868	.	KFLF:4-7,KDLQ:70-73,HDIN:79-82,KMFQ:92-95,KNIN:180-183,RDFI:244-247	0	0	0	SignalP3NN:18,SignalP3HMM:18,SignalP4:18,SignalP5:18,DeepSig:18,Phobius:18,SignalP6:18	1	1
XPS78253.1	2.168	7.633	3.281	CfPDIP1	.	.	.	0	0	0	.	.	0	.	0	0.988	0.734	0.697	0.506	.	0.958	0.364	0.27	1	1	0	0	13636.6	128	-1.5	5.163	4	47	70	41	11	73	31	15	16	1.069	LELR:LXXR:21-24	RSLS:69-72,KQLG:111-114	0	0	0	SignalP3NN:17,SignalP3HMM:17,SignalP4:17,SignalP5:17,DeepSig:17,Phobius:17,SignalP6:17	1	1
XPS76266.1	2.163	4.684	3.266	.	.	.	.	0	0	0	.	.	0	.	0	0.821	0.659	.	0.589	.	0.536	0.32	0.5	1	1	0	0	18140.9	169	-3.5	5.485	6	73	105	39	21	86	40	20	20	0.615	LVAR:LXXR:19-22,LHVR:LXXR:100-103	RDLT:50-53,HHYC:144-147	0	0	0	SignalP6:14,SignalP4:16,SignalP5:16,DeepSig:17,SignalP3NN:21,SignalP3HMM:21,Phobius:21	1	1
XPS69666.1	2.161	5.08	3.312	.	.	.	.	0	0	0	.	.	0	.	0	0.808	0.709	.	0.85	.	0.452	0.433	0.84	1	1	0	0	13902.9	131	3	8.006	9	60	83	35	11	75	17	10	7	0.867	PTRR:[LIJVAP]X[KRTPEI]R:56-59,RR:[KR]R:58-59,LNSR:LXXR:78-81	RPLC:115-118	0	0	0	SignalP3NN:19,SignalP3HMM:19,SignalP4:19,SignalP5:19,DeepSig:19,Phobius:19,SignalP6:19	1	1
XPS76866.1	2.14	3.67	3.18	.	.	.	.	0	0	0	PF00544	Repeat:Pectate_lyase_4	0	PL1_9,PL1_7,PL1,PL1_5,PL1_10,PL1_3,PL1_6,PL1_11,PL1_12,PL1_13,PL1_1,PL1_8,PL1_4,PL1_2	0	0.097	0.588	.	0.708	.	0.993	0.629	0.77	1	1	0	0	32835.7	315	6.5	8.157	4	131	206	96	34	172	71	41	30	0.889	KR:[KR]R:23-24,VIIR:[LIJVAP]X[KRTPEI]R:107-110,ASTR:[LIJVAP]X[KRTPEI]R:128-131,ANER:[LIJVAP]X[KRTPEI]R:266-269	RFFE:2-5,RNLK:110-113,KDLV:121-124,RVWV:131-134,HVYS:219-222,KAIV:252-255	0	0	0	SignalP3NN:18,SignalP3HMM:18,SignalP4:18,SignalP5:18,DeepSig:18,Phobius:18,SignalP6:24	1	1
XPS73218.1	2.139	5.093	2.824	.	.	.	.	0	0	0	.	.	0	.	0	0.971	0.785	0.812	.	.	0.333	0.284	0.33	1	1	0	0	20947.8	189	2	7.264	4	60	105	50	23	100	50	27	23	1.105	LSAR:LXXR:38-41,PRPR:[LIJVAP]X[KRTPEI]R:161-164,KR:[KR]R:176-177	KGIC:44-47,RDMC:118-121	1	0	0	SignalP3NN:19,SignalP3HMM:19,SignalP4:19,SignalP5:19,DeepSig:19,Phobius:19,SignalP6:19	1	1
XPS78249.1	2.138	5.453	3.125	.	.	.	.	0	0	0	.	.	0	.	0	0.968	0.789	.	0.694	.	0.839	0.46	0.81	1	1	0	0	10444.8	99	3.5	8.15	4	44	60	26	13	55	19	12	7	0.84	.	RQFV:45-48,RGFQ:90-93	0	0	0	SignalP3NN:18,SignalP3HMM:18,SignalP4:18,SignalP5:18,DeepSig:18,Phobius:18,SignalP6:18	1	1
XPS79101.1	2.132	8.595	3.312	MoCDIP3	.	.	.	0	0	0	.	.	0	.	0	1	0.889	0.985	0.852	.	0.096	0.246	0.57	1	1	0	0	10169.6	94	3	7.576	7	36	53	25	13	57	27	16	11	0.929	.	KLLT:2-5,KAIS:46-49,KKYG:58-61	0	0	0	SignalP3NN:19,SignalP3HMM:19,SignalP4:19,SignalP5:19,DeepSig:19,Phobius:19,SignalP6:21	1	1
XPS69006.1	2.113	6.372	3.312	.	.	.	.	0	0	0	.	.	0	.	0	1	0.904	.	0.894	.	0.961	0.666	0.92	1	1	0	0	9868.25	94	3.5	8.085	8	44	66	24	7	53	16	10	6	0.917	.	.	0	0	0	SignalP3NN:23,SignalP3HMM:23,SignalP4:23,SignalP5:23,DeepSig:23,Phobius:23,SignalP6:23	1	1
XPS77117.1	2.101	1.076	3.305	.	.	.	.	0	0	0	PF13472	Domain:Lipase_GDSL_2	0	CE12	0	0.072	0.404	.	.	0.52	0.396	0.329	0.86	1	1	0	0	27601.1	265	4.5	8.42	2	112	168	88	26	154	43	25	18	0.727	LDTR:[LIJVAP]X[KRTPEI]R&LXXR:23-26,KR:[KR]R:115-116,VPTR:[LIJVAP]X[KRTPEI]R:176-179	RSYT:75-78,HYIR:141-144,KMLI:148-151	0	0	0	SignalP3NN:18,SignalP3HMM:18,SignalP4:18,SignalP5:18,Phobius:18,SignalP6:26,DeepSig:27	1	1
XPS80760.1	2.091	5.537	3.311	.	.	.	.	0	0	0	.	.	0	.	0	0.979	0.798	0.663	.	.	0.126	0.304	0.47	1	1	0	0	12959.7	117	0	6.458	6	40	56	29	18	68	24	13	11	0.857	.	KLLL:3-6,HYLC:58-61,KGLL:114-117	0	0	0	SignalP3NN:16,SignalP4:16,SignalP3HMM:17,SignalP5:17,DeepSig:17,Phobius:17,SignalP6:17	1	1
XPS75613.1	2.088	2.813	3.154	.	.	.	.	0	0	0	PF11937	Family:DUF3455	0	.	0	0.664	0.651	.	.	0.541	0.966	0.435	0.7	1	1	0	0	25306	242	2.5	7.322	4	93	150	89	22	146	43	24	19	0.776	IIPR:[LIJVAP]X[KRTPEI]R:32-35,VSPR:[LIJVAP]X[KRTPEI]R:38-41	KTID:24-27,RMID:41-44,KAIG:100-103,HEFT:148-151,KGIP:153-156	0	0	0	SignalP3NN:20,SignalP3HMM:20,SignalP4:20,SignalP5:20,DeepSig:20,Phobius:20,SignalP6:20	1	1
XPS72910.1	2.083	4.795	3.312	.	.	.	.	0	0	0	.	.	0	.	0	0.937	0.645	.	0.829	.	0.028	0.621	0.69	1	1	0	0	9522.98	92	0.5	6.852	6	40	55	30	4	54	11	6	5	0.652	.	KCLS:64-67	0	0	0	SignalP3NN:18,SignalP3HMM:18,SignalP4:18,SignalP5:18,DeepSig:18,Phobius:18,SignalP6:18	1	1
XPS76093.1	2.068	8.232	3.263	LmAvrLm4_7	.	.	.	0	0	0	PF18661	Domain:AvrLm4-7	1	.	0	0.996	0.889	0.506	0.695	.	0.137	0.296	0.5	1	1	0	0	15441.6	136	2	7.198	7	41	70	36	20	79	30	17	13	1.222	LACR:LXXR:21-24	RYYH:26-29,KDYK:32-35,KDLA:46-49,KAFI:58-61,HQFG:69-72,RDIT:73-76,HEWQ:105-108,RSLP:114-117	0	0	0	SignalP3NN:22,SignalP3HMM:22,SignalP4:22,SignalP5:22,DeepSig:22,SignalP6:22,Phobius:24	1	1
XPS78129.1	2.055	4.89	3.31	.	.	.	.	0	0	0	.	.	0	.	0	1	0.678	.	0.562	.	0.042	0.657	0.73	1	1	0	0	24164.9	243	14	10.693	3	104	171	62	13	141	25	20	5	0.758	VSPR:[LIJVAP]X[KRTPEI]R:171-174	.	1	0	0	SignalP3NN:19,SignalP3HMM:19,SignalP4:19,SignalP5:19,DeepSig:19,Phobius:19,SignalP6:19	1	1
XPS76092.1	2.042	7.795	3.312	LmAvrLm4_7	.	.	.	0	0	0	PF18661	Domain:AvrLm4-7	1	.	0	0.993	0.822	0.576	.	.	0.957	0.293	0.49	1	1	0	0	15987.1	137	5.5	8.303	8	42	70	26	22	73	37	22	15	1.423	AIER:[LIJVAP]X[KRTPEI]R:48-51,RR:[KR]R:51-52,PGIR:[LIJVAP]X[KRTPEI]R:102-105	KIFI:2-5,KYIE:25-28,KDIY:39-42,RRMR:51-54,RVWG:62-65,HSWR:91-94,REWE:96-99,RSWP:105-108,KGWR:112-115,KNIN:132-135	1	0	0	SignalP3NN:21,SignalP3HMM:21,SignalP4:21,SignalP5:21,DeepSig:21,Phobius:21,SignalP6:21	1	1
XPS72173.1	2.04	2.97	2.96	.	.	.	.	0	0	0	PF11937	Family:DUF3455	0	.	0	0.336	0.492	.	0.608	.	0.054	0.375	0.85	1	1	0	0	21165.9	200	-1	5.724	6	80	124	65	16	113	30	15	15	0.741	.	HFFA:111-114,KWLR:147-150,KYIY:163-166	0	1	0	SignalP3NN:17,SignalP3HMM:17,SignalP4:17,SignalP5:17,DeepSig:17,Phobius:17,SignalP6:17	1	1
XPS72688.1	2.038	4.689	3.308	.	.	.	.	0	0	0	.	.	0	.	0	0.659	0.704	.	0.527	.	0.196	0.58	0.32	1	1	0	0	17475	157	5	10.056	2	49	88	40	17	83	31	18	13	1.121	LTKR:[LIJVAP]X[KRTPEI]R&LXXR:39-42,KR:[KR]R:41-42,LNTR:[LIJVAP]X[KRTPEI]R&LXXR:152-155	.	0	1	0	SignalP3NN:19,SignalP3HMM:19,SignalP4:19,SignalP5:19,DeepSig:19,Phobius:19,SignalP6:19	1	1
XPS70206.1	2.018	5.215	3.304	Zt6,BghBEC1011,BgtAvrPm2,BghCSEP0055,BgtSvrPm3a1f1,BgAVRA13	.	.	.	0	0	0	PF00545	Domain:Ribonuclease	1	.	0	0.196	0.488	.	0.734	.	0.042	0.348	0.85	1	1	0	0	14395.1	138	2.5	7.69	4	62	91	38	18	83	18	11	7	0.659	LDPR:[LIJVAP]X[KRTPEI]R&LXXR:29-32	HLLT:2-5,HKYN:73-76	0	0	0	SignalP3NN:15,SignalP3HMM:15,SignalP4:15,SignalP5:15,DeepSig:15,Phobius:15,SignalP6:15	1	1
XPS77745.1	2.011	5.361	3.255	.	.	.	.	0	0	0	.	.	0	.	0	0.974	0.727	0.602	0.507	.	0.211	0.328	0.47	1	1	0	0	18603	176	-2	5.164	6	63	101	45	14	98	35	17	18	0.694	LAPR:[LIJVAP]X[KRTPEI]R&LXXR:34-37,LFFR:LXXR:40-43	HLLP:2-5,RQLA:43-46,RPFA:71-74	1	0	0	SignalP3NN:19,SignalP3HMM:19,SignalP4:19,SignalP5:19,DeepSig:19,Phobius:19,SignalP6:19	1	1
XPS78462.1	2.008	6.501	3.309	.	.	.	.	0	0	0	PF09044	Domain:Kp4	0	.	0	0.999	0.896	0.692	0.556	.	0.949	0.316	0.57	1	1	0	0	19161.3	174	8.5	8.575	11	59	96	47	14	97	40	25	15	1.176	LNCR:LXXR:48-51,KR:[KR]R:169-170	RDYV:68-71,KWWW:144-147,RLMR:154-157,RVWF:159-162	1	0	0	SignalP3HMM:21,SignalP5:21,Phobius:21,SignalP6:21,SignalP3NN:27,SignalP4:27,DeepSig:27	1	1
XPS75507.1	2.007	4.706	3.31	.	.	.	.	0	0	0	.	.	0	.	0	0.998	0.64	0.539	.	.	0.143	0.247	0.55	1	1	0	0	12179.6	112	2	7.924	6	32	62	40	6	74	20	11	9	0.679	LKPR:[LIJVAP]X[KRTPEI]R&LXXR:98-101	RTWA:46-49,KDLK:65-68	0	0	0	SignalP3NN:19,SignalP3HMM:19,SignalP4:19,SignalP5:19,DeepSig:19,Phobius:19,SignalP6:19	1	1
XPS69416.1	2.005	2.307	2.411	FGL1,RsAGLIP1	.	.	.	0	0	0	PF01764,PF03893	Family:Lipase_3,Domain:Lipase3_N	1	.	0	0.016	0.515	.	.	0.639	0.012	0.542	0.82	1	1	0	0	32982.1	308	0.5	6.627	6	117	180	96	31	169	55	29	26	1	LEKR:[LIJVAP]X[KRTPEI]R&LXXR:25-28,KR:[KR]R:27-28,LSFR:LXXR:105-108,LGYR:LXXR:237-240,IEIR:[LIJVAP]X[KRTPEI]R:300-303	KLIV:101-104,RNWL:114-117,HSLG:171-174,KYIS:209-212,HLWY:284-287,RGLN:303-306	0	0	0	SignalP3NN:20,SignalP3HMM:20,SignalP4:20,SignalP5:20,DeepSig:20,Phobius:20,SignalP6:28	1	1
XPS68899.1	2.003	1.452	2.456	.	.	.	.	0	0	0	.	.	0	.	0	0.42	0.615	.	.	0.623	0.791	0.577	0.71	1	1	0	0	30350.4	273	4	7.53	10	86	158	69	36	159	57	32	25	0.909	LWAR:LXXR:123-126,AEIR:[LIJVAP]X[KRTPEI]R:209-212,KR:[KR]R:256-257	KDWS:113-116,KYLW:121-124,RLLM:150-153,RTWA:159-162,RVII:260-263	0	0	0	SignalP3NN:22,SignalP3HMM:22,SignalP4:22,SignalP5:22,DeepSig:22,Phobius:22,SignalP6:22	1	1
XPS78282.1	1.999	5.795	3.312	.	.	.	.	0	0	0	PF10645	Domain:Carb_bind	0	CBM52	0	1	0.799	.	0.921	.	0.637	0.273	0.87	1	1	0	0	16017.1	152	-4	4.214	14	71	96	39	17	97	16	6	10	0.682	.	REYS:124-127	0	0	0	SignalP3NN:19,SignalP3HMM:19,SignalP4:19,SignalP5:19,DeepSig:19,Phobius:19,SignalP6:19	1	1
XPS78784.1	1.986	3.483	3.121	.	.	.	.	0	0	0	.	.	0	.	0	0.073	0.591	.	0.591	.	0.69	0.543	0.59	1	1	0	0	34491.2	314	3	7.449	11	111	185	79	35	175	75	40	35	1.029	ADIR:[LIJVAP]X[KRTPEI]R:85-88,PYER:[LIJVAP]X[KRTPEI]R:119-122,KR:[KR]R:144-145,KR:[KR]R:266-267	KFFC:2-5,KVYS:49-52,RMWD:105-108,KCLL:112-115,RSYY:145-148,RAIF:176-179,RPYQ:219-222,KIMG:283-286	1	0	0	SignalP3NN:19,SignalP3HMM:19,SignalP4:19,SignalP5:19,DeepSig:19,Phobius:19,SignalP6:24	1	1
XPS80900.1	1.986	5.471	3.312	.	.	.	.	0	0	0	.	.	0	.	0	1	0.757	.	0.799	.	0.373	0.464	0.94	1	1	0	0	6717.84	65	2	7.926	6	29	45	17	4	42	8	5	3	0.579	.	KGLK:38-41	0	0	0	SignalP3NN:17,SignalP4:17,SignalP5:17,DeepSig:17,SignalP6:17,SignalP3HMM:19,Phobius:19	1	1
XPS77988.1	1.986	2.697	2.717	.	.	.	.	0	0	0	PF01095	Repeat:Pectinesterase	0	CE8	0	0.002	0.564	.	0.514	.	0.003	0.291	0.81	1	1	0	0	36296.9	333	9	9.511	3	118	193	104	40	186	54	32	22	1.211	ADER:[LIJVAP]X[KRTPEI]R:20-23,AGTR:[LIJVAP]X[KRTPEI]R:298-301	KTIY:60-63,RSYK:92-95,RLWT:122-125,KFYN:129-132,KGYI:212-215,RPWR:249-252,RVIF:256-259,KSYL:261-264,KPIK:310-313,KEFW:324-327	0	0	0	SignalP3NN:17,SignalP4:17,DeepSig:17,SignalP6:17,SignalP3HMM:19,SignalP5:19,Phobius:19	1	1
XPS68287.1	1.983	2.038	2.615	.	.	.	.	0	0	0	PF09224	Domain:DUF1961	0	.	0	0.551	0.648	.	.	0.51	0.04	0.442	0.47	1	1	0	0	26003.4	233	2	7.394	0	69	123	71	34	135	48	26	22	1.111	LLYR:LXXR:21-24,LKPR:[LIJVAP]X[KRTPEI]R&LXXR:109-112,RR:[KR]R:133-134,PEER:[LIJVAP]X[KRTPEI]R:137-140,KR:[KR]R:182-183,LIAR:LXXR:221-224	KLLY:20-23,RLLH:125-128,RRWP:134-137,RAFH:140-143,RGMQ:216-219,RNLE:226-229	0	0	0	SignalP3NN:18,SignalP3HMM:18,SignalP4:18,SignalP5:18,DeepSig:18,Phobius:18,SignalP6:18	1	1
XPS81835.1	1.979	2.994	2.907	.	.	.	.	0	0	0	PF00544	Repeat:Pectate_lyase_4	0	PL1_7,PL1_9,PL1_10,PL1,PL1_5,PL1_6,PL1_3,PL1_4,PL1_12,PL1_8,PL1_1,PL1_11,PL1_13,PL1_2	0	0.036	0.535	.	0.653	.	0.747	0.387	0.85	1	1	0	0	33071.7	317	1.5	6.774	0	128	202	101	35	168	58	32	26	1.205	IDTR:[LIJVAP]X[KRTPEI]R:233-236	KIIY:63-66,KSIV:83-86,KVLA:116-119,KDYY:148-151,HIFK:219-222	0	0	0	SignalP3NN:18,SignalP3HMM:18,SignalP4:18,SignalP5:18,DeepSig:18,Phobius:18,SignalP6:18	1	1
XPS71534.1	1.971	3.051	1.18	.	.	.	.	0	0	0	.	.	0	.	0	0.746	0.745	0.618	.	.	0.951	0.239	0.22	1	1	0	0	22802.8	202	0	6.493	1	53	102	62	25	106	49	26	23	1.053	VSTR:[LIJVAP]X[KRTPEI]R:37-40,IETR:[LIJVAP]X[KRTPEI]R:41-44,RR:[KR]R:89-90,LFLR:LXXR:91-94	HHLK:4-7,KTLP:78-81,RRLF:89-92,RVLY:156-159,KALQ:179-182,KLLL:193-196	0	0	0	SignalP3NN:22,SignalP3HMM:22,SignalP4:22,SignalP5:22,DeepSig:22,Phobius:22,SignalP6:22	1	1
XPS70985.1	1.968	5.154	3.312	.	.	.	.	0	0	0	.	.	0	.	0	0.961	0.685	.	0.73	.	0.951	0.432	0.89	1	1	0	0	8108.2	76	1	7.033	6	32	50	19	10	48	8	5	3	0.714	.	.	0	0	0	SignalP3NN:17,SignalP3HMM:17,SignalP4:17,SignalP5:17,DeepSig:17,Phobius:17,SignalP6:17	1	1
XPS74340.1	1.966	2.122	3.189	.	.	.	.	0	0	0	PF00190	Domain:Cupin_1	0	.	0	0.628	0.641	.	.	0.729	0.112	0.458	0.63	1	1	0	0	24279.8	227	-0.5	6.368	4	77	133	74	22	133	41	22	19	0.943	KR:[KR]R:218-219	KALN:21-24,HALL:41-44,KDYD:58-61,HNIV:105-108,HVMQ:146-149	0	0	0	SignalP3NN:19,SignalP3HMM:19,SignalP4:19,SignalP5:19,DeepSig:19,Phobius:19,SignalP6:19	1	1
XPS68141.1	1.964	6.408	3.296	.	.	.	.	0	0	0	.	.	0	.	0	0.996	0.874	0.762	0.809	.	0.305	0.384	0.64	1	1	0	0	16190.4	147	-1.5	5.181	11	60	89	40	10	70	35	17	18	1.25	.	KLYV:38-41,KTLE:91-94,HYIW:98-101,KCMK:111-114	0	0	0	SignalP3NN:17,SignalP3HMM:17,SignalP5:17,DeepSig:17,SignalP4:19,Phobius:23,SignalP6:23	1	1
XPS71511.1	1.963	3.045	3.06	FGL1,RsAGLIP1	.	.	.	0	0	0	PF01764,PF03893	Family:Lipase_3,Domain:Lipase3_N	1	.	0	0.004	0.462	.	.	0.571	0.993	0.461	0.84	1	1	0	0	34949.6	317	6.5	8.224	6	111	180	94	45	178	52	31	21	1.269	ANKR:[LIJVAP]X[KRTPEI]R:27-30,KR:[KR]R:29-30,AKIR:[LIJVAP]X[KRTPEI]R:299-302,RR:[KR]R:302-303	HALP:16-19,RAID:30-33,RLMS:41-44,RAII:104-107,HSLG:174-177,KDFQ:261-264,HRWY:286-289	0	0	0	SignalP4:17,SignalP5:17,SignalP3NN:22,SignalP3HMM:22,DeepSig:22,Phobius:22,SignalP6:30	1	1
XPS81712.1	1.959	5.825	3.205	BfNep1,FoeNEP1,PpNPP1,PsojNIP,PaSD21-1,PiNPP1,VdNEP,MpNEP1_1,MpNEP1_2	.	.	.	0	0	0	PF05630	Family:NPP1	1	.	0	0.175	0.614	.	0.553	.	0.992	0.438	0.65	1	1	0	0	25291.5	239	0.5	6.632	3	96	144	73	31	145	39	21	18	0.757	LEKR:[LIJVAP]X[KRTPEI]R&LXXR:26-29,KR:[KR]R:28-29,LGHR:LXXR:127-130	KPYL:57-60,KVFN:61-64,HDWE:131-134,HQLI:185-188	0	0	0	SignalP3NN:21,SignalP3HMM:21,SignalP4:21,SignalP5:21,DeepSig:21,Phobius:21,SignalP6:29	1	1
XPS68031.1	1.955	3.108	2.941	.	.	.	.	0	0	0	.	.	0	.	0	0.851	0.706	.	.	0.51	0.806	0.253	0.28	1	1	0	0	24481.8	219	-1	6.098	6	69	111	62	27	120	51	26	25	1.222	LDER:[LIJVAP]X[KRTPEI]R&LXXR:53-56,LPKR:[LIJVAP]X[KRTPEI]R&LXXR:187-190,KR:[KR]R:189-190,PSPR:[LIJVAP]X[KRTPEI]R:197-200,RR:[KR]R:216-217	HAIT:2-5,KDFS:24-27,HAWN:108-111,RRLE:216-219	0	0	0	SignalP3NN:19,SignalP3HMM:19,SignalP4:19,SignalP5:19,DeepSig:19,Phobius:19,SignalP6:19	1	1
XPS72006.1	1.951	5.835	2.688	CfPDIP1	.	.	.	0	0	0	.	.	0	.	0	0.506	0.657	.	0.885	.	0.063	0.391	0.74	1	1	0	0	23849.4	216	-8.5	4.546	8	75	131	54	31	117	50	22	28	1.152	PYIR:[LIJVAP]X[KRTPEI]R:35-38,LHDR:LXXR:73-76	KHLH:71-74,HTYS:116-119	0	0	0	SignalP3NN:22,SignalP3HMM:22,SignalP4:22,SignalP5:22,DeepSig:22,Phobius:22,SignalP6:22	1	1
XPS71812.1	1.95	5.041	3.304	MoCDIP4,ChNIS1,CoNIS1,MoNIS1	.	.	.	0	0	0	PF03443	Family:AA9	1	AA9	0	0.097	0.447	.	0.799	.	0.529	0.363	0.93	1	1	0	0	24058.2	232	5	8.452	4	98	151	70	21	135	35	21	14	0.776	LTWR:LXXR:77-80	HTIF:19-22,HTLT:81-84,RLIA:136-139,KTYT:220-223	0	0	0	SignalP3NN:18,SignalP3HMM:18,SignalP4:18,SignalP5:18,Phobius:18,SignalP6:18	1	1
XPS81306.1	1.938	3.618	2.851	.	.	.	.	0	0	0	.	.	0	.	0	1	0.8	.	.	0.517	0.796	0.6	0.37	1	1	0	0	8955.43	82	6	8.64	7	34	45	30	6	49	21	14	7	0.409	ARKR:[LIJVAP]X[KRTPEI]R:27-30,KR:[KR]R:29-30,KR:[KR]R:47-48	RNIR:72-75	0	0	0	SignalP3NN:19,SignalP3HMM:19,SignalP4:19,SignalP5:19,Phobius:19,DeepSig:26	1	1
XPS74580.1	1.936	8.358	3.312	CfPDIP1	.	.	.	0	0	0	.	.	0	.	0	1	0.85	0.587	0.89	.	0.79	0.298	0.6	1	1	0	0	12985.9	121	1.5	7.431	8	47	71	34	12	75	22	12	10	0.781	.	KYLA:2-5,KVLA:29-32,RELR:56-59,RSYY:116-119	0	0	0	SignalP3NN:19,SignalP3HMM:19,SignalP4:19,SignalP5:19,DeepSig:19,Phobius:19,SignalP6:19	1	1
XPS81836.1	1.925	6.098	3.284	.	.	.	.	0	0	0	.	.	0	.	0	0.998	0.875	.	0.734	.	0.869	0.647	0.64	1	1	0	0	11167.3	103	2	7.241	5	40	60	21	13	55	20	12	8	0.885	.	RGWS:23-26	0	0	0	SignalP3NN:19,SignalP3HMM:19,SignalP5:19,Phobius:19,SignalP6:19	1	1
XPS72060.1	1.923	8.259	3.312	.	.	.	.	0	0	0	PF00187	Domain:Chitin_bind_1	1	CBM18	0	1	0.856	0.652	0.871	.	0.025	0.378	0.92	1	1	0	0	22314.1	218	4	7.442	24	107	153	47	19	128	40	23	17	0.697	.	KPFS:59-62	0	1	0	SignalP3NN:17,SignalP3HMM:17,SignalP4:17,SignalP5:17,DeepSig:17,Phobius:17,SignalP6:17	1	1
XPS68076.1	1.922	5.338	3.288	MoCDIP4	.	.	.	0	0	0	PF03067	Domain:LPMO_10	0	AA16,AA11,AA15	0	0.102	0.524	.	0.795	.	0.149	0.601	0.79	1	1	0	0	19516	186	-6	4.091	7	70	120	57	17	115	17	6	11	0.732	.	.	0	0	0	SignalP3NN:18,SignalP3HMM:18,SignalP4:18,DeepSig:18,SignalP6:18,SignalP5:20,Phobius:35	1	1
XPS73916.1	1.917	0.994	1.174	.	.	.	.	0	0	0	.	.	0	.	0	0.986	0.669	.	.	0.578	0.17	0.257	0.48	1	1	1	0	19835.7	185	0	6.489	0	60	105	64	20	109	40	21	19	0.809	LLAR:LXXR:2-5,IIKR:[LIJVAP]X[KRTPEI]R:129-132,KR:[KR]R:131-132	RLLL:5-8,HLLR:67-70,RGIV:82-85,KKFV:97-100,KPIV:142-145,KTFL:159-162,KYWW:164-167	0	0	0	DeepSig:16,SignalP4:18,SignalP5:23,SignalP3NN:26,SignalP3HMM:26,Phobius:26,SignalP6:26	1	1
XPS75812.1	1.915	5.583	3.308	.	.	.	.	0	0	0	PF01083	Domain:Cutinase	1	CE5	0	0.292	0.518	.	0.946	.	0.101	0.261	0.94	1	1	0	0	23315	228	2.5	7.637	5	102	153	71	15	126	30	17	13	0.797	KR:[KR]R:25-26,INTR:[LIJVAP]X[KRTPEI]R:38-41,LSAR:LXXR:165-168	RTMN:54-57,KIYN:68-71,KTLD:180-183,KQLG:223-226	0	1	0	SignalP3NN:18,SignalP3HMM:18,SignalP4:18,SignalP5:18,DeepSig:18,Phobius:18,SignalP6:26	1	1
XPS81810.1	1.893	2.677	3.245	.	.	.	.	0	0	0	PF01095	Repeat:Pectinesterase	0	CE8	0	0	0.446	.	0.594	.	0.029	0.59	0.94	1	1	0	0	41738.6	385	6	8.31	7	144	242	99	51	213	56	32	24	1.121	LSLR:LXXR:237-240	HILV:67-70,RAYN:160-163,RPYS:171-174,RPWN:286-289,RSIF:293-296,KDYG:330-333,KQYE:353-356,KVFQ:363-366	0	0	0	SignalP3NN:16,SignalP3HMM:16,SignalP4:16,SignalP5:16,DeepSig:16,Phobius:16,SignalP6:16	1	1
XPS77406.1	1.887	2.664	3.196	.	.	.	.	0	0	0	PF00657	Family:Lipase_GDSL	0	CE16	0	0	0.442	.	0.533	.	0.46	0.432	0.82	1	1	0	0	38819.6	357	1	6.845	4	124	214	101	48	208	55	29	26	1.022	ITPR:[LIJVAP]X[KRTPEI]R:105-108	KTLV:34-37,RSWA:77-80,KLYN:90-93,RPLS:108-111,KFFT:140-143,RYFV:196-199,KKYP:263-266,REFV:340-343	0	0	0	SignalP3NN:21,SignalP3HMM:21,SignalP4:21,SignalP5:21,DeepSig:21,Phobius:21,SignalP6:21	1	1
XPS77676.1	1.884	6.04	3.312	.	.	.	.	0	0	0	.	.	0	.	0	1	0.852	.	0.841	.	0.738	0.575	0.69	1	1	0	0	7106.37	66	5.5	8.782	6	28	35	19	9	46	10	8	2	1	RR:[KR]R:30-31,LCNR:LXXR:63-66	RLLA:4-7,KFIG:33-36	0	0	0	SignalP3NN:17,SignalP3HMM:17,SignalP4:17,SignalP5:17,DeepSig:17,Phobius:17,SignalP6:17	1	1
XPS70957.1	1.882	4.656	3.094	.	.	.	.	0	0	0	PF01083	Domain:Cutinase	1	CE5	0	0.235	0.426	.	0.546	.	0.122	0.207	0.81	1	1	0	0	26137.4	252	-3.5	5.004	4	105	158	90	20	147	44	21	23	0.764	LTKR:[LIJVAP]X[KRTPEI]R&LXXR:61-64,KR:[KR]R:63-64,LASR:LXXR:111-114	KEYA:44-47,RQYG:64-67,KVLI:212-215,RNYE:235-238	0	0	0	SignalP3NN:18,SignalP3HMM:18,SignalP4:18,SignalP5:18,DeepSig:18,Phobius:18,SignalP6:25	1	1
XPS78110.1	1.882	2.321	2.653	.	.	.	.	0	0	0	PF00544	Repeat:Pectate_lyase_4	0	PL1_7,PL1,PL1_10,PL1_9,PL1_5,PL1_6,PL1_3,PL1_4,PL1_8,PL1_12,PL1_1,PL1_11,PL1_13,PL1_2	0	0.267	0.444	.	0.54	.	0.051	0.476	0.8	1	1	0	0	32521.6	309	1.5	6.758	5	118	200	105	30	174	60	33	27	0.957	LASR:LXXR:11-14,KR:[KR]R:77-78,VIIR:[LIJVAP]X[KRTPEI]R:107-110,VRTR:[LIJVAP]X[KRTPEI]R:232-235	RGLT:2-5,RVYV:78-81,KSII:85-88,KIIG:93-96,KDFY:148-151,HFFN:202-205,HLFN:219-222	0	1	0	SignalP3NN:20,SignalP3HMM:20,SignalP4:20,SignalP5:20,DeepSig:20,Phobius:20,SignalP6:20	1	1
XPS71830.1	1.881	6.358	3.312	.	.	.	.	0	0	0	.	.	0	.	0	1	0.864	0.604	0.858	.	0.471	0.415	0.74	1	1	0	0	7919.09	75	4	7.854	8	30	46	20	6	42	14	10	4	0.929	VWER:[LIJVAP]X[KRTPEI]R:56-59	KVLA:4-7,RCLK:20-23,HNLK:43-46,HVLV:47-50	0	0	0	SignalP3NN:18,SignalP3HMM:18,SignalP4:18,SignalP5:18,DeepSig:18,Phobius:18,SignalP6:18	1	1
XPS79655.1	1.878	6.452	2.603	.	.	.	.	0	0	0	PF00188	Domain:CAP	1	.	0	0.852	0.73	0.858	.	.	0.09	0.436	0.22	1	1	0	0	19667.8	175	0	6.49	2	58	92	42	26	86	45	24	21	0.917	LSSR:LXXR:15-18,RR:[KR]R:101-102,LGWR:LXXR:126-129	HVLP:6-9,RTFA:18-21,REWS:69-72,RDYE:102-105,KEYE:107-110,RALS:137-140	0	0	0	SignalP3NN:21,SignalP3HMM:21,SignalP4:21,SignalP5:21,DeepSig:21,Phobius:21,SignalP6:21	1	1
XPS81241.1	1.876	3.187	3.293	MoCDIP1	.	.	.	0	0	0	PF13229	Repeat:Beta_helix	0	PL9_3,PL9,PL9_1,PL9_2,PL31,GH160	0	0	0.45	.	.	0.51	0.094	0.409	0.91	1	1	0	0	42156.7	399	2	7.816	2	162	248	115	40	211	63	33	30	1.069	LVTR:[LIJVAP]X[KRTPEI]R&LXXR:151-154,KR:[KR]R:370-371	KSIQ:40-43,KNIQ:66-69,KGIQ:127-130,RLWN:209-212,HQFT:269-272,KGFT:282-285	0	0	0	SignalP3NN:18,SignalP3HMM:18,SignalP4:18,SignalP5:18,DeepSig:18,Phobius:18,SignalP6:18	1	1
XPS74633.1	1.868	4.768	3.303	MoCDIP4,ChNIS1,CoNIS1,MoNIS1	.	.	.	0	0	0	PF03443	Family:AA9	1	AA9,AA11	0	0.043	0.418	.	0.727	.	0.345	0.421	0.91	1	1	0	0	23223.1	223	5.5	8.319	5	98	145	69	25	128	32	20	12	0.855	.	KSFA:2-5,HYIF:21-24,KEIG:118-121,KTLT:183-186	0	0	0	SignalP3NN:20,SignalP3HMM:20,SignalP4:20,SignalP5:20,DeepSig:20,Phobius:20,SignalP6:20	1	1
XPS68184.1	1.868	6.067	3.287	MoCDIP4,CoNIS1,ChNIS1,MoNIS1	.	.	.	0	0	0	PF03443	Family:AA9	1	AA9	0	0.685	0.572	.	0.659	.	0.025	0.337	0.83	1	1	0	0	23652.8	229	5	8.224	6	97	151	72	24	142	39	23	16	0.644	KR:[KR]R:143-144	RAFT:144-147,KNIA:150-153,KAIY:210-213	0	0	0	SignalP3NN:16,SignalP3HMM:16,SignalP4:16,SignalP5:16,DeepSig:16,Phobius:16,SignalP6:16	1	1
XPS69596.1	1.868	5.786	3.292	.	.	.	.	0	0	0	PF03211	Repeat:Pectate_lyase	1	PL3_2,PL3,PL3_4,PL3_5,PL3_1,PL3_3	0	0.614	0.516	.	0.788	.	0.032	0.619	0.86	1	1	0	0	18057	176	-3	5.468	4	80	116	55	17	96	32	16	16	0.714	.	KTIA:50-53,KQWD:63-66,HCLG:107-110,KVLQ:149-152,HLIL:166-169	0	0	0	SignalP3NN:17,SignalP3HMM:17,SignalP4:17,SignalP5:17,DeepSig:17,Phobius:27,SignalP6:27	1	1
XPS70767.1	1.868	2.824	3.041	.	.	.	.	0	0	0	.	.	0	.	0	0.098	0.462	.	0.574	.	0.939	0.355	0.84	1	1	0	0	27483	256	-5	4.84	8	97	159	74	25	144	47	22	25	0.881	LAKR:[LIJVAP]X[KRTPEI]R&LXXR:90-93,KR:[KR]R:92-93,LTTR:[LIJVAP]X[KRTPEI]R&LXXR:192-195,RR:[KR]R:195-196	HDID:24-27,HEWL:73-76,RALV:99-102,RTWT:165-168,KPLT:190-193,RRYG:195-198,RSLC:234-237	0	0	0	SignalP5:17,SignalP6:17,SignalP3NN:22,SignalP3HMM:22,SignalP4:22,DeepSig:22,Phobius:22	1	1
XPS78646.1	1.867	3.497	3.241	.	.	.	.	0	0	0	PF00445	Domain:Ribonuclease_T2	0	.	0	0.017	0.575	.	0.554	.	0.933	0.265	0.91	1	1	0	0	28846.1	268	-2	5.621	12	117	166	65	32	141	42	21	21	1.016	LKDR:LXXR:100-103	HGLW:72-75,RAYT:91-94,KDYQ:117-120,HEWS:129-132,KDLP:167-170,KTYS:186-189,KYLP:250-253,KDFS:254-257	0	0	0	SignalP3NN:20,SignalP4:20,SignalP5:20,DeepSig:20,Phobius:20,SignalP6:20,SignalP3HMM:24	1	1
XPS77340.1	1.862	0.122	3.22	.	.	.	.	0	0	0	PF01095	Repeat:Pectinesterase	0	CE8	0	0	0.244	.	.	0.551	0.796	0.296	0.87	1	1	0	0	35402.8	336	12.5	9.77	4	145	212	114	35	192	49	31	18	0.912	PATR:[LIJVAP]X[KRTPEI]R:19-22,VDIR:[LIJVAP]X[KRTPEI]R:202-205	HLLA:3-6,RVYN:129-132,KGFQ:163-166,KAIA:194-197,RVLT:205-208,RPWR:252-255,KKLS:310-313,KDWV:327-330	0	1	0	SignalP3NN:17,SignalP3HMM:17,SignalP4:17,SignalP5:17,DeepSig:17,Phobius:17,SignalP6:17	1	1
XPS70343.1	1.862	3.516	3.288	.	.	.	.	0	0	0	PF00445	Domain:Ribonuclease_T2	0	.	0	0.007	0.581	.	0.531	.	0.752	0.5	0.84	1	1	0	0	36558.7	329	2	6.869	10	119	186	72	56	181	62	34	28	1.09	.	KPLL:37-40,HGLW:89-92,RQYD:108-111,HEFS:169-172,KYYQ:205-208,KWLK:214-217,KKIV:219-222,HVYG:280-283,HYYQ:311-314	1	0	0	SignalP3NN:20,SignalP3HMM:20,SignalP4:20,SignalP5:20,Phobius:20,SignalP6:20	1	1
XPS68429.1	1.861	5.558	3.312	.	.	.	.	0	0	0	.	.	0	.	0	0.999	0.76	0.703	.	.	0.974	0.545	0.68	1	1	0	0	5622.59	54	0.5	6.942	2	19	35	20	4	35	11	6	5	0.812	.	KFIT:2-5	0	0	0	SignalP3NN:19,SignalP3HMM:19,SignalP4:19,SignalP5:19,DeepSig:19,Phobius:19,SignalP6:19	1	1
XPS79102.1	1.855	5.014	3.29	.	.	.	.	0	0	0	.	.	0	.	0	0.947	0.692	.	0.69	.	0.361	0.476	0.74	1	1	0	0	20707	198	6	8.123	14	85	128	63	20	136	25	16	9	0.585	LVKR:[LIJVAP]X[KRTPEI]R&LXXR:34-37,KR:[KR]R:36-37	KNFN:62-65,RCLA:85-88,KILR:185-188	0	1	0	SignalP3NN:24,SignalP3HMM:24,SignalP4:24,SignalP5:24,DeepSig:24,Phobius:24,SignalP6:24	1	1
XPS79929.1	1.846	2.654	3.232	.	.	.	.	0	0	0	PF14273	Family:DUF4360	0	.	0	0.048	0.419	.	0.71	.	0.118	0.217	0.84	1	1	0	0	21229.9	200	1	7.578	4	83	126	56	22	112	31	16	15	0.917	.	KILP:52-55,KEFT:60-63,RKFC:76-79	0	0	0	SignalP5:16,Phobius:18,SignalP3NN:22,SignalP3HMM:22,SignalP4:22,DeepSig:22,SignalP6:22	1	1
XPS71448.1	1.846	5.815	3.312	.	.	.	.	0	0	0	.	.	0	.	0	1	0.839	.	0.767	.	0.12	0.362	0.68	1	1	0	0	11703.5	105	1	6.723	7	33	61	31	15	59	22	13	9	1.333	.	HTYH:38-41,KSLP:60-63,HKFS:94-97	0	0	0	SignalP3NN:19,SignalP3HMM:19,SignalP4:19,SignalP5:19,DeepSig:19,Phobius:19,SignalP6:19	1	1
XPS74602.1	1.842	5.474	3.308	.	.	.	.	0	0	0	.	.	0	.	0	1	0.769	.	0.828	.	0.032	0.418	0.75	1	1	0	0	18851.9	178	-6.5	4.573	16	82	124	46	17	96	36	16	20	0.619	PCIR:[LIJVAP]X[KRTPEI]R:125-128	.	0	0	0	SignalP3HMM:21,SignalP4:21,SignalP5:21,DeepSig:21,SignalP3NN:23,Phobius:23,SignalP6:23	1	1
XPS69127.1	1.836	6.095	3.312	.	.	.	.	0	0	0	.	.	0	.	0	1	0.838	.	0.988	.	0.995	0.65	0.72	1	1	0	0	8428.52	78	3	7.883	7	35	51	17	7	39	16	10	6	1.357	RR:[KR]R:37-38	RSFN:2-5,KLWI:9-12	0	0	0	SignalP3NN:21,SignalP4:21,SignalP5:21,DeepSig:21,SignalP6:21,SignalP3HMM:24,Phobius:24	1	1
XPS75411.1	1.835	1.84	3.237	.	.	.	.	0	0	0	PF01095	Repeat:Pectinesterase	0	CE8	0	0	0.267	.	0.577	.	0.397	0.247	0.83	1	1	0	0	35599.6	335	8	9.422	3	146	214	98	37	178	48	28	20	1.065	LVPR:[LIJVAP]X[KRTPEI]R&LXXR:22-25,VNTR:[LIJVAP]X[KRTPEI]R:136-139,ADIR:[LIJVAP]X[KRTPEI]R:202-205	RAWS:122-125,KVYN:129-132,KGFQ:163-166,KSYI:180-183,RVLA:205-208,RPWR:252-255,KEWS:277-280,KKLS:309-312,KDWV:326-329	0	1	0	SignalP3NN:17,SignalP3HMM:17,SignalP4:17,SignalP5:17,DeepSig:17,Phobius:17,SignalP6:25	1	1
XPS81574.1	1.833	5.561	2.66	MoCDIP4	.	.	.	0	0	0	.	.	0	.	0	0.248	0.671	0.621	.	.	0.437	0.444	0.19	1	1	0	0	26515.9	238	-1	6.234	5	75	129	50	32	130	64	33	31	0.983	.	RSLP:3-6,HSWL:18-21,KQIL:29-32,KGWP:62-65,KLMF:124-127,KEIE:156-159,KELN:162-165,KEIG:171-174,KDME:208-211,RHMF:214-217	0	0	0	SignalP3NN:17,SignalP4:17,SignalP5:17,SignalP6:17,SignalP3HMM:19,Phobius:19	1	1
XPS77338.1	1.827	0.715	1.794	.	.	.	.	0	0	0	.	.	0	.	0	0.517	0.619	.	.	0.637	0.006	0.414	0.42	1	1	0	0	24275.5	215	1.5	6.835	3	59	115	60	33	123	53	29	24	0.923	LPIR:[LIJVAP]X[KRTPEI]R&LXXR:81-84	KPWD:48-51,HYLV:53-56,KFLP:79-82,HVYW:187-190,HPLQ:198-201	0	0	0	SignalP3NN:22,SignalP3HMM:22,SignalP4:22,SignalP5:22,DeepSig:22,Phobius:22,SignalP6:29	1	1
XPS75505.1	1.825	2.331	2.882	.	.	.	.	0	0	0	PF10503	Family:Esterase_PHB	0	CE1	0	0.011	0.453	.	0.533	.	0.032	0.387	0.83	1	1	0	0	30939.2	292	-1	6.095	6	114	182	86	30	171	47	24	23	0.889	ALTR:[LIJVAP]X[KRTPEI]R:21-24,KR:[KR]R:88-89	KGFI:78-81,RDFN:89-92,KGLS:100-103,KVFV:130-133,KAMY:200-203,KQWS:234-237	0	0	0	SignalP4:16,SignalP3NN:20,SignalP5:20,DeepSig:20,Phobius:20,SignalP6:20,SignalP3HMM:23	1	1
XPS71995.1	1.825	5.814	3.308	.	.	.	.	0	0	0	PF01083	Domain:Cutinase	1	CE5	0	0.506	0.538	.	0.79	.	0.076	0.392	0.86	1	1	0	0	23281.3	229	6	8.315	10	106	152	76	21	144	27	17	10	0.707	LTER:[LIJVAP]X[KRTPEI]R&LXXR:22-25	KVYI:30-33,KSYC:189-192	0	0	0	SignalP3NN:17,SignalP3HMM:17,SignalP4:17,SignalP5:17,DeepSig:17,Phobius:17,SignalP6:25	1	1
XPS77172.1	1.825	5.521	3.305	MoCDIP1	.	.	.	0	0	0	PF00295	Repeat:Glyco_hydro_28	0	GH28	0	0.018	0.569	.	0.705	.	0.5	0.458	0.92	1	1	0	0	40363.7	385	-4	5.542	10	148	255	107	37	206	62	31	31	1.419	ITIR:[LIJVAP]X[KRTPEI]R:322-325	KGFT:76-79,HFIE:130-133,KVLG:136-139,HDIY:144-147,HCFS:154-157,HGLS:236-239,KNIT:348-351	0	1	0	SignalP3NN:18,SignalP3HMM:18,SignalP4:18,SignalP5:18,DeepSig:18,Phobius:18,SignalP6:18	1	1
XPS77387.1	1.815	0.225	3.027	.	.	.	.	0	0	0	.	.	0	.	0	0.427	0.239	.	.	0.536	0.081	0.529	0.78	1	1	0	0	29498.6	289	-6.5	4.411	0	109	191	116	12	167	36	15	21	0.761	LVVR:LXXR:126-129,IVER:[LIJVAP]X[KRTPEI]R:136-139	RLFF:6-9,RVFD:139-142,KTLN:180-183,KTFS:232-235	0	0	0	SignalP3NN:22,SignalP3HMM:22,SignalP4:22,SignalP5:22,DeepSig:22,Phobius:22,SignalP6:22	1	1
XPS70123.1	1.815	1.658	3.259	.	.	.	.	0	0	0	PF00141	Domain:peroxidase	0	AA2	0	0.081	0.579	.	.	0.651	0.753	0.623	0.48	1	1	0	0	32812.2	310	4.5	7.685	6	115	186	97	32	181	72	40	32	0.728	LFAR:LXXR:27-30,AAIR:[LIJVAP]X[KRTPEI]R:63-66,LKGR:LXXR:110-113,KR:[KR]R:297-298	HLIN:2-5,KELT:45-48,KFLS:50-53,HAIV:131-134,KLFQ:172-175,KGFD:177-180,KYYA:220-223,KEFK:249-252,KNLI:281-284,RELK:298-301	0	0	0	SignalP3NN:15,SignalP3HMM:15,SignalP4:15,SignalP5:15,DeepSig:15,Phobius:15,SignalP6:15	1	1
XPS73357.1	1.815	5.977	3.127	MoCDIP4,ChNIS1,CoNIS1	.	.	.	0	0	0	PF03443	Family:AA9	1	AA9,AA11	0	0.417	0.588	0.65	0.518	.	0.046	0.418	0.27	1	1	0	0	31312.8	288	-1	6.298	5	109	165	66	41	154	73	38	35	0.973	RR:[KR]R:279-280	HYFF:18-21,KPLE:32-35,KNIR:52-55,KIFE:127-130,KEYP:229-232,RAFR:280-283	0	0	0	SignalP3NN:17,SignalP3HMM:17,SignalP4:17,SignalP5:17,DeepSig:17,Phobius:17,SignalP6:17	1	1
XPS81769.1	1.809	6.128	3.312	.	.	.	.	0	0	0	.	.	0	.	0	1	0.87	.	0.797	.	0.838	0.302	0.69	1	1	0	0	7753.13	71	4	8.289	8	28	41	21	8	46	10	7	3	1.429	.	RCIS:30-33,KCWS:65-68	0	0	0	SignalP3NN:19,SignalP3HMM:19,SignalP4:19,SignalP5:19,DeepSig:19,Phobius:19,SignalP6:19	1	1
XPS77287.1	1.809	2.111	0.52	.	.	.	.	0	0	0	PF10681	Family:Rot1	0	.	0	0.495	0.784	.	0.544	.	0.018	0.438	0.61	1	1	1	0	26162.8	233	5	8.798	2	73	123	59	38	132	51	29	22	1.275	IYTR:[LIJVAP]X[KRTPEI]R:127-130,KR:[KR]R:151-152,KR:[KR]R:194-195	KGII:86-89,RQMD:114-117,HKIK:148-151,KMLP:174-177,RGLP:195-198	0	0	0	SignalP3NN:19,SignalP3HMM:19,SignalP4:19,SignalP5:19,DeepSig:19,Phobius:19,SignalP6:19	1	1
XPS68520.1	1.806	2.418	3.142	.	.	.	.	0	0	0	PF13472	Domain:Lipase_GDSL_2	0	CE12	0	0.15	0.384	.	0.608	.	0.011	0.292	0.82	1	1	0	0	26631.2	259	4.5	9.522	0	112	170	95	23	151	40	23	17	0.816	VSRR:[LIJVAP]X[KRTPEI]R:144-147,RR:[KR]R:146-147	KNFG:64-67,KNIT:113-116,RKFS:147-150,KYLN:187-190,KNYV:234-237,KYIF:251-254	0	0	0	SignalP4:21,SignalP5:21,DeepSig:21,Phobius:21,SignalP6:21,SignalP3NN:25,SignalP3HMM:25	1	1
XPS73034.1	1.806	0	3.235	.	.	.	.	0	0	0	PF17996,PF13472	Domain:CE2_N,Domain:Lipase_GDSL_2	0	CE2	0	0	0.278	.	.	0.687	0.964	0.278	0.8	1	1	0	0	37941.9	360	6.5	9.098	2	141	228	123	38	212	57	33	24	0.786	VLRR:[LIJVAP]X[KRTPEI]R:101-104,LRRR:LXXR:102-105,RR:[KR]R:103-104,ALTR:[LIJVAP]X[KRTPEI]R:129-132,LYTR:[LIJVAP]X[KRTPEI]R&LXXR:206-209,IQTR:[LIJVAP]X[KRTPEI]R:273-276	RFLG:27-30,KELT:37-40,KALT:128-131,RQIE:132-135,KTYG:164-167,KGLV:186-189,RNIA:190-193,KQIQ:271-274,KQLG:314-317	0	0	0	SignalP3NN:14,SignalP4:14,SignalP5:14,DeepSig:20,SignalP6:22,SignalP3HMM:23,Phobius:23	1	1
XPS78482.1	1.805	2.812	3.185	.	.	.	.	0	0	0	.	.	0	.	0	0.028	0.467	.	0.687	.	0.099	0.588	0.75	1	1	0	0	23729.5	216	-6	4.401	2	76	124	61	31	127	31	13	18	0.943	ALTR:[LIJVAP]X[KRTPEI]R:114-117,VKIR:[LIJVAP]X[KRTPEI]R:212-215	KALP:27-30,HALT:108-111,HYIG:154-157,RLLP:195-198,KTFV:209-212	0	0	0	SignalP3NN:20,SignalP3HMM:20,SignalP4:20,SignalP5:20,DeepSig:20,Phobius:20,SignalP6:20	1	1
XPS71202.1	1.8	6.738	2.976	CfPDIP1	.	.	.	0	0	0	.	.	0	.	0	0.876	0.642	0.737	0.679	.	0.343	0.461	0.63	1	1	0	0	15084.8	137	-4	4.845	6	44	84	33	15	66	34	16	18	1.619	.	HTLL:41-44,HCWN:67-70,KDLD:73-76,HSWG:103-106,KELK:115-118,HNLN:120-123	0	0	0	SignalP3NN:24,SignalP3HMM:24,SignalP4:24,SignalP5:24,DeepSig:24,Phobius:24,SignalP6:24	1	1
XPS73515.1	1.798	2.309	3.271	.	.	.	.	0	0	0	PF00544	Repeat:Pectate_lyase_4	0	PL1_7,PL1,PL1_9,PL1_10,PL1_5,PL1_6,PL1_3,PL1_8,PL1_1,PL1_4,PL1_12,PL1_13,PL1_11,PL1_2	0	0.003	0.345	.	0.508	.	0.78	0.342	0.84	1	1	0	0	34101.3	329	7.5	8.838	2	140	211	110	32	179	58	35	23	0.926	LAKR:[LIJVAP]X[KRTPEI]R&LXXR:31-34,KR:[KR]R:33-34,VNTR:[LIJVAP]X[KRTPEI]R:244-247	KVLA:29-32,RVIV:79-82,KTIV:99-102,RNLK:122-125,KVLA:128-131,HTYF:180-183,HFYK:214-217,HIFN:231-234,KKMV:264-267	0	1	0	SignalP3NN:17,SignalP3HMM:17,SignalP4:17,SignalP5:17,DeepSig:17,Phobius:17,SignalP6:34	1	1
XPS78655.1	1.79	6.001	3.312	.	.	.	.	0	0	0	.	.	0	.	0	1	0.865	.	0.828	.	0.25	0.399	0.82	1	1	0	0	6789.94	64	4	8.393	7	28	42	18	5	42	10	7	3	0.706	.	KYLV:2-5	0	0	0	SignalP3NN:20,SignalP3HMM:20,SignalP4:20,SignalP5:20,DeepSig:20,Phobius:20,SignalP6:20	1	1
XPS81639.1	1.783	4.677	3.312	.	.	.	.	0	0	0	.	.	0	.	0	0.956	0.614	.	0.843	.	0.085	0.59	0.81	1	1	0	0	11537.9	112	2	7.48	8	56	75	27	11	66	13	8	5	0.7	RR:[KR]R:82-83	.	0	0	0	SignalP3NN:20,SignalP3HMM:20,SignalP4:20,SignalP5:20,DeepSig:20,Phobius:20,SignalP6:20	1	1
XPS72504.1	1.779	6.242	2.597	UvHrip1,MoHrip2	.	.	.	0	0	0	.	.	0	.	0	0.97	0.675	.	0.772	.	0.069	0.261	0.66	1	1	0	0	23168.1	212	-4	4.928	8	71	129	56	30	129	38	18	20	0.88	VDRR:[LIJVAP]X[KRTPEI]R:139-142,RR:[KR]R:141-142	RNIG:125-128,KVYQ:131-134,KVWY:145-148,RYLA:163-166	0	0	0	SignalP3NN:21,SignalP3HMM:21,SignalP4:21,SignalP5:21,DeepSig:21,Phobius:21,SignalP6:21	1	1
XPS67709.1	1.774	6.152	3.312	.	.	.	.	0	0	0	.	.	0	.	0	1	0.835	0.527	0.759	.	0.606	0.271	0.66	1	1	0	0	6156.32	58	3	8.245	6	22	39	22	4	41	11	7	4	0.632	VLKR:[LIJVAP]X[KRTPEI]R:36-39,KR:[KR]R:38-39	.	0	0	0	SignalP4:20,SignalP3NN:25,SignalP3HMM:25,SignalP5:25,DeepSig:25,Phobius:25,SignalP6:25	1	1
XPS69172.1	1.772	2.32	3.286	.	.	.	.	0	0	0	PF00657	Family:Lipase_GDSL	0	CE16	0	0	0.369	.	0.574	.	0.012	0.348	0.9	1	1	0	0	35649.1	325	6.5	8.642	4	118	201	90	51	182	49	29	20	1.192	IFTR:[LIJVAP]X[KRTPEI]R:165-168,KR:[KR]R:220-221	KNLF:30-33,KTYN:87-90,RNFL:182-185,KVIA:213-216,KRLS:220-223,KVFN:245-248,KAYP:255-258,KFLG:316-319	0	0	0	SignalP3NN:17,SignalP3HMM:17,SignalP4:17,SignalP5:17,DeepSig:17,Phobius:17,SignalP6:17	1	1
XPS76090.1	1.769	3.391	2.968	.	.	.	.	0	0	0	.	.	0	.	0	0.252	0.572	.	0.568	.	0.634	0.286	0.9	1	1	0	0	31989.3	293	1	6.665	12	100	165	76	35	166	61	33	28	1.141	LKKR:[LIJVAP]X[KRTPEI]R&LXXR:98-101,KR:[KR]R:100-101,PTPR:[LIJVAP]X[KRTPEI]R:278-281	HHWN:33-36,RVWD:113-116,KFLG:124-127,KVMS:130-133,KTYT:144-147,KIFL:168-171,HCYY:261-264,KALC:270-273,HYLG:274-277	0	0	0	SignalP3NN:19,SignalP3HMM:19,SignalP4:19,SignalP5:19,DeepSig:19,Phobius:19,SignalP6:19	1	1
XPS70768.1	1.768	8.248	3.307	MoSPD5,MoBas4,FolSix5	.	.	.	0	0	0	.	.	0	.	0	0.999	0.874	.	0.952	.	0.981	0.316	0.58	1	1	0	0	12980.4	118	-6	4.451	8	45	72	29	18	68	26	11	15	0.821	.	HNYA:22-25,RVYE:31-34,KNFE:49-52	0	0	0	SignalP3NN:19,SignalP3HMM:19,SignalP4:19,SignalP5:19,Phobius:19	1	1
XPS80162.1	1.754	3.481	3.237	.	.	.	.	0	0	0	.	.	0	.	0	0.39	0.498	.	0.827	.	0.255	0.32	0.78	1	1	0	0	17209.1	169	-4	4.491	6	74	116	55	11	94	23	10	13	0.553	LTFR:LXXR:49-52	KLFA:2-5,RQLT:69-72,RSFS:86-89,KALD:111-114	0	0	0	SignalP3NN:15,SignalP3HMM:15,SignalP4:15,DeepSig:15,SignalP5:16,Phobius:16,SignalP6:21	1	1
XPS80902.1	1.748	1.28	2.848	.	.	.	.	0	0	0	PF10503	Family:Esterase_PHB	0	CE1,CE19	0	0.017	0.565	.	.	0.524	0.003	0.266	0.8	1	1	0	0	33292.7	306	5.5	8.207	6	107	179	87	42	181	58	33	25	1	PNPR:[LIJVAP]X[KRTPEI]R:31-34,RR:[KR]R:303-304	KSLS:4-7,RSWA:70-73,KNYD:124-127,RVFV:132-135,KIIK:186-189,KGFR:206-209,HGLN:216-219,KEWT:233-236,HNIP:278-281,KCYS:299-302	0	0	0	SignalP3NN:18,SignalP3HMM:18,SignalP4:18,SignalP5:18,DeepSig:18,SignalP6:18,Phobius:20	1	1
XPS79681.1	1.736	5.934	3.312	.	.	.	.	0	0	0	.	.	0	.	0	1	0.823	.	0.892	.	0.803	0.539	0.7	1	1	0	0	9049.57	88	1.5	7.371	10	41	57	32	5	59	12	7	5	0.519	KR:[KR]R:36-37	RCLY:37-40	0	0	0	SignalP3NN:19,SignalP4:19,SignalP5:19,DeepSig:19,SignalP6:19,SignalP3HMM:21,Phobius:25	1	1
XPS73008.1	1.73	1.842	2.709	PsXEG1	.	.	.	0	0	0	PF01670	Domain:Glyco_hydro_12	1	GH12	0	0.002	0.299	.	.	0.552	0.578	0.363	0.88	1	1	0	0	29181.2	270	0.5	6.922	3	100	160	78	29	149	39	20	19	1.25	.	KALL:4-7,KQIT:82-85,KGYS:103-106,KSIP:122-125,KLYQ:195-198,KQFT:215-218,KLWL:226-229	0	0	0	SignalP3NN:17,SignalP3HMM:17,SignalP4:17,SignalP5:17,DeepSig:17,Phobius:17,SignalP6:17	1	1
XPS73144.1	1.729	4.017	2.986	CfEcp7	.	.	.	0	0	0	.	.	0	.	0	0.745	0.598	.	.	0.703	0.772	0.252	0.08	1	1	0	0	20463.8	191	2	7.559	6	67	106	62	14	122	35	19	16	0.554	AIPR:[LIJVAP]X[KRTPEI]R:2-5,RR:[KR]R:5-6,IEIR:[LIJVAP]X[KRTPEI]R:28-31,AFER:[LIJVAP]X[KRTPEI]R:99-102,PEER:[LIJVAP]X[KRTPEI]R:156-159,LGGR:LXXR:187-190	RRLV:5-8,KMMA:36-39,RSMW:166-169	0	1	0	Phobius:25,SignalP3NN:27,SignalP3HMM:27,SignalP4:27,SignalP5:27	1	1
XPS76843.1	1.704	0.613	3.137	.	.	.	.	0	0	0	PF03664	Family:Glyco_hydro_62	0	GH62,GH43	0	0	0.36	.	.	0.505	0.192	0.519	0.81	1	1	0	0	37537	344	3.5	7.669	5	129	207	97	52	200	50	28	22	1.049	.	RCLL:2-5,RNIA:51-54,HVFA:69-72,KLWY:123-126,KDIS:140-143,KNFY:152-155,HLFS:184-187,HLYR:193-196,KYLL:235-238,RYFR:249-252,RSLA:257-260,KSIS:289-292,RYLY:313-316	0	1	0	SignalP3NN:18,SignalP3HMM:18,SignalP4:18,SignalP5:18,DeepSig:18,Phobius:18,SignalP6:18	1	1
XPS77765.1	1.7	2.522	3.103	.	.	.	.	0	0	0	PF01328	Family:Peroxidase_2	0	.	0	0	0.452	.	0.509	.	0.025	0.356	0.86	1	1	0	0	45191.3	425	0	6.489	5	155	267	121	50	246	73	38	35	0.84	KR:[KR]R:38-39,LFGR:LXXR:211-214,RR:[KR]R:314-315	HAFV:86-89,HNFL:109-112,KTIS:282-285,KLFG:336-339	0	0	0	SignalP3NN:16,SignalP3HMM:16,SignalP4:16,SignalP5:16,DeepSig:16,Phobius:16,SignalP6:16	1	1
XPS67718.1	1.698	3.4	3.295	.	.	.	.	0	0	0	.	.	0	.	0	0.439	0.438	.	0.786	.	0.917	0.458	0.86	1	1	0	0	9651.72	91	-2.5	4.825	4	40	59	27	11	48	17	8	9	0.8	.	HCFR:34-37,KNYC:50-53	0	0	0	SignalP3NN:19,SignalP3HMM:19,SignalP4:19,SignalP5:19,DeepSig:19,SignalP6:19,Phobius:21	1	1
XPS72511.1	1.695	2.473	3.306	.	.	.	.	0	0	0	PF03664	Family:Glyco_hydro_62	0	GH62	0	0	0.372	.	0.563	.	0.628	0.324	0.87	1	1	0	0	35572.8	330	5.5	9.215	2	129	205	86	42	184	44	25	19	1	LPYR:LXXR:319-322	KDFT:51-54,KKLV:61-64,KVWV:114-117,KNMY:169-172,KIYR:181-184,KYLM:227-230,RYFR:240-243	0	0	0	SignalP3NN:22,SignalP3HMM:22,SignalP4:22,SignalP5:22,DeepSig:22,Phobius:22,SignalP6:22	1	1
XPS69852.1	1.691	3.967	3.309	MoCDIP4,ChNIS1,CoNIS1	.	.	.	0	0	0	PF03443	Family:AA9	1	AA9	0	0.002	0.291	.	0.595	.	0.018	0.32	0.91	1	1	0	0	26215.3	251	4.5	8.124	4	110	163	74	29	147	31	19	12	0.74	LYKR:[LIJVAP]X[KRTPEI]R&LXXR:220-223,KR:[KR]R:222-223	HGFV:21-24,RLYA:85-88,KNLK:167-170,HEII:178-181	0	0	0	SignalP3NN:20,SignalP3HMM:20,SignalP4:20,SignalP5:20,DeepSig:20,Phobius:20,SignalP6:20	1	1
XPS72832.1	1.69	0.069	0.053	.	.	.	.	0	0	0	.	.	0	.	0	0.977	0.709	.	.	0.585	0.282	0.449	0.24	1	1	1	0	16847.9	158	1.5	6.978	1	59	92	53	14	88	34	19	15	0.478	LQKR:[LIJVAP]X[KRTPEI]R&LXXR:32-35,KR:[KR]R:34-35,RR:[KR]R:78-79	KRLE:34-37,RKLR:70-73,HELE:113-116	1	0	0	SignalP3NN:18,SignalP3HMM:18,SignalP4:18,SignalP5:18,Phobius:18,SignalP6:18	1	1
XPS70245.1	1.655	0.595	2.979	.	.	.	.	0	0	0	PF00150	Domain:Cellulase	0	GH5_23,GH5_9,GH5,GH5_46,GH5_15,GH5_44,GH5_45,GH5_54,GH5_22,GH5_14,GH5_50,GH5_33,GH5_36,GH5_4,GH5_5,GH5_49,GH5_8,GH5_47	0	0	0.413	.	.	0.551	0.145	0.212	0.82	1	1	0	0	43257.7	393	3.5	7.319	8	130	225	113	59	228	73	40	33	1.222	KR:[KR]R:85-86,IGER:[LIJVAP]X[KRTPEI]R:164-167	RKFH:34-37,KRYA:85-88,KDID:94-97,KYLK:131-134,KKYG:142-145,HSLP:153-156,HFIQ:192-195,KYFK:236-239,HNYY:281-284,KTLA:303-306,KSLN:333-336,KYLG:355-358,KQYC:389-392	0	0	0	SignalP3NN:20,SignalP3HMM:20,SignalP4:20,SignalP5:20,DeepSig:20,Phobius:20,SignalP6:20	1	1
XPS72341.1	1.653	5.113	3.312	.	.	.	.	0	0	0	.	.	0	.	0	1	0.69	.	0.827	.	0.186	0.7	0.88	1	1	0	0	6213.25	61	-0.5	5.48	8	31	43	19	5	42	6	3	3	0.579	.	RCLC:56-59	0	0	0	SignalP3NN:19,SignalP3HMM:19,SignalP4:19,SignalP5:19,DeepSig:19,Phobius:19,SignalP6:19	1	1
XPS70181.1	1.65	-1.047	-0.09	.	.	.	.	0	0	0	PF03896	Family:TRAP_alpha	0	.	0	0.567	0.588	.	.	0.555	0.118	0.194	0.12	1	1	1	0	29243.5	269	6.5	9.814	0	81	145	93	24	150	56	32	24	1.032	LSLR:LXXR:12-15,IVER:[LIJVAP]X[KRTPEI]R:156-159,KR:[KR]R:256-257,VKPR:[LIJVAP]X[KRTPEI]R:265-268	RALN:15-18,KLIN:55-58,KPIG:74-77,RNLT:97-100	1	0	0	SignalP3NN:21,SignalP3HMM:21,SignalP4:21,SignalP5:21,DeepSig:21,Phobius:21,SignalP6:21	1	1
XPS76248.1	1.647	-0.144	3.299	.	.	.	.	0	0	0	PF04616	Family:Glyco_hydro_43	0	GH43_26,GH43,GH43_27,GH43_34,GH43_31,GH43_32,GH43_3,GH43_30,GH43_8,GH43_17,GH43_33,GH43_10,GH43_2,GH43_11,GH43_22,GH43_12,GH43_29,GH43_9,GH43_18,GH43_14	0	0	0.223	.	.	0.586	0.034	0.367	0.85	1	1	0	0	35085.2	323	6.5	8.526	5	132	196	72	47	177	45	27	18	1.04	.	KFLQ:2-5,KTLE:60-63,HYFD:91-94,HVLK:115-118,KVLS:180-183,KTYL:208-211,KEIW:270-273	0	0	0	SignalP3NN:20,SignalP3HMM:20,SignalP4:20,SignalP5:20,DeepSig:20,Phobius:20,SignalP6:20	1	1
XPS71023.1	1.644	4.681	2.838	.	.	.	.	0	0	0	.	.	0	.	0	0.94	0.696	0.854	.	.	0.477	0.369	0.55	1	1	0	0	18045.8	172	-1	5.195	3	60	93	67	3	95	31	15	16	0.791	LNTR:[LIJVAP]X[KRTPEI]R&LXXR:29-32,IDIR:[LIJVAP]X[KRTPEI]R:96-99,LEMR:LXXR:126-129	KLFM:2-5,KDLQ:64-67,KVLA:87-90,RAMN:99-102	0	0	0	SignalP3NN:15,SignalP4:15,SignalP3HMM:21,SignalP5:21,DeepSig:21,Phobius:21,SignalP6:32	1	1
XPS77591.1	1.642	3.895	3.295	MoCDIP4,ChNIS1,CoNIS1	.	.	.	0	0	0	PF03443	Family:AA9	1	AA9	0	0.129	0.537	.	.	0.511	0.82	0.531	0.74	1	1	0	0	31274.6	290	-1.5	6.272	4	106	174	75	38	155	68	36	32	0.821	AGTR:[LIJVAP]X[KRTPEI]R:154-157,VSER:[LIJVAP]X[KRTPEI]R:211-214,RR:[KR]R:282-283	KIFN:3-6,KTYQ:32-35,RGLS:38-41,HGWT:117-120,KFFK:140-143,RQFW:214-217,RDFS:286-289	0	0	0	SignalP3NN:20,SignalP3HMM:20,SignalP4:20,SignalP5:20,DeepSig:20,SignalP6:20,Phobius:26	1	1
XPS72975.1	1.634	5.199	3.312	.	.	.	.	0	0	0	.	.	0	.	0	1	0.699	.	0.831	.	0.383	0.614	0.85	1	1	0	0	6137.98	61	-1.5	4.551	7	33	42	16	6	39	9	4	5	0.8	.	HFFG:2-5,KCLS:48-51	0	0	0	SignalP3NN:20,SignalP3HMM:20,SignalP4:20,SignalP5:20,DeepSig:20,Phobius:20,SignalP6:20	1	1
XPS74583.1	1.632	6.255	3.312	Cri_9402	.	.	.	0	0	0	.	.	0	.	0	0.875	0.545	.	0.806	.	0.203	0.413	0.89	1	1	0	0	15017.4	144	-4.5	4.554	8	71	98	29	17	75	25	11	14	0.892	.	KSIV:4-7,KAIQ:44-47,HQYD:70-73,HGYP:76-79	0	0	0	SignalP3NN:18,SignalP4:18,SignalP5:18,DeepSig:18,SignalP6:18,SignalP3HMM:20,Phobius:22	1	1
XPS81062.1	1.619	4.863	3.311	.	.	.	.	0	0	0	PF11327	Family:Egh16-like	1	.	0	0.567	0.348	.	0.66	.	0.077	0.441	0.87	1	1	0	0	38014.9	385	-4.5	4.809	8	178	277	118	15	210	43	20	23	0.667	KR:[KR]R:373-374	KFLS:378-381,RFLL:382-385	0	0	0	SignalP3NN:19,SignalP3HMM:19,SignalP4:19,SignalP5:19,DeepSig:19,Phobius:19,SignalP6:19	1	1
XPS81456.1	1.616	2.174	3.106	.	.	.	.	0	0	0	PF01828	Family:Peptidase_A4	0	.	0	0.009	0.363	.	0.519	.	0.419	0.465	0.85	1	1	0	0	28225.1	261	-8.5	4.551	2	100	160	74	31	138	48	21	27	0.967	LPRR:[LIJVAP]X[KRTPEI]R&LXXR:65-68,RR:[KR]R:67-68,RR:[KR]R:86-87,LENR:LXXR:147-150,RR:[KR]R:150-151,LGAR:LXXR:191-194	RAIA:6-9,RDFN:68-71,RGLI:87-90,KIFS:211-214,HLID:223-226	0	0	0	SignalP3NN:20,SignalP3HMM:20,SignalP4:20,SignalP5:20,DeepSig:20,Phobius:20,SignalP6:20	1	1
XPS73760.1	1.614	2.947	2.952	.	.	.	.	0	0	0	.	.	0	.	0	0.953	0.689	.	.	0.594	0.912	0.391	0.62	1	1	0	0	18029.6	173	2	7.049	2	65	104	66	16	107	27	16	11	0.692	.	HGML:116-119,RTII:141-144,RVLH:158-161	0	0	0	SignalP3NN:18,SignalP4:18,SignalP6:18,SignalP5:20,SignalP3HMM:22,Phobius:30	1	1
XPS72477.1	1.59	3.751	3.303	.	.	.	.	0	0	0	PF00734	Domain:CBM_1	1	CBM1	0	0	0.228	.	0.8	.	0.038	0.785	0.8	1	1	0	0	26072.3	250	3	7.915	6	113	165	80	29	155	24	14	10	0.645	.	HKYM:115-118,KPLY:121-124,KLLY:159-162,RYIN:169-172,HYYN:241-244	0	1	0	SignalP3NN:18,SignalP3HMM:18,SignalP4:18,SignalP5:18,DeepSig:18,Phobius:18,SignalP6:18	1	1
XPS69208.1	1.589	0.884	3.307	.	.	.	.	0	0	0	PF01975	Family:SurE	0	.	0	0.008	0.389	.	.	0.512	0.024	0.469	0.95	1	1	0	0	31465.5	302	2	7.509	7	122	199	99	24	176	39	21	18	0.882	IFTR:[LIJVAP]X[KRTPEI]R:229-232,AVIR:[LIJVAP]X[KRTPEI]R:260-263	RIIQ:18-21,RTFF:33-36,KLWS:115-118,KIYA:181-184,KPYL:199-202,KYIF:227-230,KPIL:295-298	0	0	0	SignalP3NN:16,SignalP3HMM:16,SignalP4:16,SignalP5:16,Phobius:16,SignalP6:16	1	1
XPS75406.1	1.58	7.755	3.312	.	.	.	.	0	0	0	PF06766	Family:Hydrophobin_2	1	.	0	1	0.784	.	0.864	.	0.953	0.613	0.78	1	1	0	0	9667.39	94	7	8.948	8	44	60	31	4	59	13	10	3	0.741	.	RPYI:2-5,RTLK:47-50,KSLC:60-63	0	0	0	SignalP3HMM:19,SignalP5:19,Phobius:21,SignalP6:21,SignalP3NN:27,SignalP4:27,DeepSig:27	1	1
XPS79674.1	1.579	5.293	3.307	MoCDIP4,ChNIS1,CoNIS1	.	.	.	0	0	0	PF03443,PF00734	Family:AA9,Domain:CBM_1	1	AA9,CBM1	0	0.017	0.534	.	0.702	.	0.237	0.269	0.74	1	1	0	0	34624.1	328	12	8.89	10	129	210	90	39	195	59	37	22	0.765	ADIR:[LIJVAP]X[KRTPEI]R:57-60	HYFF:18-21,KEYD:123-126,KIFQ:133-136,RDWV:155-158,KDFP:233-236,KWYS:321-324	0	0	0	SignalP3NN:17,SignalP3HMM:17,SignalP4:17,SignalP5:17,DeepSig:17,Phobius:17,SignalP6:17	1	1
XPS77949.1	1.578	4.12	3.31	MoCDIP1	.	.	.	0	0	0	PF00544	Repeat:Pectate_lyase_4	0	PL1_4,PL1,PL1_7,PL1_5,PL1_2,PL1_10,PL1_8,PL1_6,PL1_9,PL1_1,PL1_13	0	0	0.329	.	0.522	.	0.021	0.579	0.9	1	1	0	0	39092.9	377	13	9.347	6	162	244	115	42	217	63	40	23	0.916	LIAR:LXXR:192-195	RVIV:59-62,KTFD:65-68,KAIN:92-95,KSLI:129-132,RHYW:228-231,HAFE:277-280,KILA:286-289,KVFA:308-311,KSYL:322-325,KNLV:366-369	0	0	0	SignalP3NN:17,SignalP3HMM:17,SignalP4:17,SignalP5:17,DeepSig:17,Phobius:17,SignalP6:17	1	1
XPS76199.1	1.564	-0.725	2.746	.	.	.	.	0	0	0	.	.	0	CE1	0	0	0.261	.	.	0.671	0.007	0.405	0.8	1	1	0	0	35047.9	322	-9.5	4.65	7	117	188	82	43	172	60	27	33	1.057	VSTR:[LIJVAP]X[KRTPEI]R:54-57,ATER:[LIJVAP]X[KRTPEI]R:176-179,INTR:[LIJVAP]X[KRTPEI]R:227-230,KR:[KR]R:247-248	RGYR:57-60,HPIP:206-209,HGFK:214-217,HDWP:287-290,KALT:300-303,KNWT:318-321	0	0	0	SignalP3HMM:20,SignalP4:20,Phobius:20,SignalP3NN:21,SignalP5:21,DeepSig:21,SignalP6:21	1	1
XPS81103.1	1.563	2.232	3.307	.	.	.	.	0	0	0	PF09792	Domain:But2	0	.	0	0.054	0.301	.	0.809	.	0.306	0.426	0.91	1	1	0	0	23653.1	229	2.5	7.922	6	89	157	64	20	141	31	17	14	0.746	LETR:[LIJVAP]X[KRTPEI]R&LXXR:27-30	KTFT:2-5,RTLG:30-33,KLLA:37-40	0	1	0	SignalP3NN:16,SignalP3HMM:16,SignalP4:16,SignalP5:16,DeepSig:16,Phobius:16,SignalP6:16	1	1
XPS78012.1	1.56	0.995	2.826	.	.	.	.	0	0	0	PF00150	Domain:Cellulase	0	GH5_5,GH5,GH5_25,GH5_4,GH5_2,GH5_22,GH5_40	0	0.004	0.547	.	.	0.637	0.612	0.682	0.78	1	1	0	0	37553.2	336	5	8.698	2	109	179	91	52	187	59	33	26	1.432	LMER:[LIJVAP]X[KRTPEI]R&LXXR:80-83	RKLK:29-32,KNFP:46-49,KDYT:54-57,KTID:62-65,HNLS:87-90,KAYL:95-98,HNYG:120-123,RFYG:124-127,KTWW:137-140,HDMD:162-165,KQYI:187-190,HQYL:227-230,KWLK:256-259,KSYF:331-334	0	0	0	SignalP3NN:18,SignalP3HMM:18,SignalP4:18,SignalP5:18,DeepSig:18,Phobius:18,SignalP6:26	1	1
XPS71415.1	1.559	7.394	3.111	CfPDIP1	.	.	.	0	0	0	.	.	0	.	0	0.984	0.787	.	0.556	.	0.93	0.487	0.49	1	1	0	0	18861.7	176	4.5	8.23	6	65	96	49	21	110	32	19	13	0.88	LQRR:[LIJVAP]X[KRTPEI]R&LXXR:31-34,RR:[KR]R:33-34	HALP:26-29,RGLP:34-37,KSIG:67-70,KNFD:81-84,RTLR:90-93,KALP:132-135,KEIQ:153-156	0	0	0	SignalP3NN:27,SignalP3HMM:27,SignalP4:27,SignalP5:27,DeepSig:27,Phobius:27,SignalP6:27	1	1
XPS71837.1	1.543	1.965	3.159	.	.	.	.	0	0	0	PF08450	Repeat:SGL	0	.	0	0	0.322	.	0.528	.	0.161	0.543	0.84	1	1	0	0	42676.8	399	-5.5	4.929	1	135	248	123	52	237	59	28	31	1.086	.	RVFN:32-35,KPFH:65-68,RQFN:210-213,KAYV:281-284,RNLS:296-299,KTFA:319-322,RVYT:339-342,KLIG:356-359,KIYT:360-363,KLFY:385-388	0	0	0	SignalP3NN:19,SignalP3HMM:19,SignalP4:19,SignalP5:19,DeepSig:19,Phobius:19,SignalP6:19	1	1
XPS72042.1	1.524	3.532	3.302	.	.	.	.	0	0	0	PF08881	Domain:CVNH	0	.	0	0.468	0.457	.	0.765	.	0.972	0.327	0.76	1	1	0	0	13645.5	129	-0.5	5.669	6	55	80	39	11	69	16	8	8	1.208	.	KLFM:5-8,HIFS:117-120	0	1	0	SignalP3NN:19,SignalP3HMM:19,SignalP4:19,SignalP5:19,DeepSig:19,Phobius:19,SignalP6:19	1	1
XPS72397.1	1.521	2.028	2.953	CfTom1	.	.	.	0	0	0	PF00150	Domain:Cellulase	0	GH5_7,GH5,GH5_41,GH5_19,GH5_22,GH5_46,GH5_47,GH5_1,GH5_14,GH173,GH158,GH5_45,GH5_9,GH5_54,GH5_8,GH5_13,GH5_31,GH5_25,GH5_24,GH5_36,GH5_37	0	0	0.279	.	.	0.563	0.938	0.474	0.89	1	1	0	0	40592.6	374	2	6.879	8	144	226	111	52	210	66	36	30	1.155	.	KYYA:44-47,KILR:76-79,KLII:130-133,RSLD:218-221,HMIA:224-227,HLYP:266-269,KSWG:270-273,HTIY:353-356,KKIG:371-374	0	0	1	SignalP3NN:15,SignalP3HMM:15,SignalP4:15,Phobius:18,SignalP5:19,DeepSig:25,SignalP6:26	1	1
XPS67811.1	1.521	3.667	3.267	.	.	.	.	0	0	0	PF00188	Domain:CAP	1	.	0	0.061	0.228	.	0.593	.	0.013	0.513	0.82	1	1	0	0	25050.2	239	-5	4.823	5	96	158	76	23	141	41	19	22	0.62	.	KPLA:132-135,HKLN:157-160	0	0	0	SignalP3NN:16,SignalP3HMM:16,SignalP4:16,SignalP5:16,DeepSig:16,Phobius:16,SignalP6:16	1	1
XPS69270.1	1.521	0.784	3.045	.	.	.	.	0	0	0	.	.	0	.	0	0.054	0.396	.	.	0.55	0.898	0.303	0.85	1	1	0	0	23816.6	223	-5	4.908	4	85	138	65	25	122	38	18	20	0.8	.	KIFY:151-154,HSWE:170-173,KTWN:208-211	0	0	0	SignalP3NN:20,SignalP3HMM:20,SignalP4:20,SignalP5:20,DeepSig:20,Phobius:20,SignalP6:20	1	1
XPS81773.1	1.508	1.857	3.128	.	.	.	.	0	0	0	.	.	0	.	0	0.005	0.252	.	0.732	.	0.992	0.713	0.93	1	1	0	0	15615.3	149	-3	4.948	2	67	96	41	17	79	23	11	12	0.941	.	RFII:2-5,HIYG:47-50,KIFS:74-77,KPFT:122-125,HDII:138-141	0	0	0	SignalP6:14,SignalP3NN:19,SignalP3HMM:19,SignalP4:19,SignalP5:19,DeepSig:19,Phobius:19	1	1
XPS72735.1	1.508	0.345	3.263	.	.	.	.	0	0	0	PF01328	Family:Peroxidase_2	0	.	0	0	0.293	.	.	0.52	0.087	0.257	0.84	1	1	0	0	47370.2	445	-0.5	6.264	5	156	274	128	48	264	69	35	34	0.902	KR:[KR]R:39-40,KR:[KR]R:82-83,LSSR:LXXR:198-201,VPER:[LIJVAP]X[KRTPEI]R:296-299,RR:[KR]R:306-307,IYPR:[LIJVAP]X[KRTPEI]R:324-327	RGFN:131-134,HHLS:196-199,KQLV:204-207,KEFS:216-219,KSYA:225-228,KSIL:276-279,RNII:327-330,KVYF:431-434	0	0	0	SignalP3NN:17,SignalP3HMM:17,SignalP4:17,SignalP5:17,DeepSig:17,SignalP6:17,Phobius:19	1	1
XPS80975.1	1.5	1.224	3.219	.	.	.	.	0	0	0	PF00657	Family:Lipase_GDSL	0	CE16	0	0.002	0.534	.	.	0.685	0.725	0.378	0.78	1	1	0	0	37584.3	337	4	7.418	5	102	183	91	48	179	68	38	30	1.364	VLKR:[LIJVAP]X[KRTPEI]R:156-159,KR:[KR]R:158-159,LTTR:[LIJVAP]X[KRTPEI]R&LXXR:316-319	KSLI:34-37,RQLW:111-114,KQIL:140-143,KVLK:155-158,RVYN:203-206,KNLL:210-213,KGLD:303-306,KVLV:326-329,KWLG:330-333	0	0	0	SignalP3NN:17,SignalP3HMM:17,SignalP4:17,SignalP5:17,Phobius:17,SignalP6:17	1	1
XPS78309.1	1.483	1.765	3.308	.	.	.	.	0	0	0	PF00840	Domain:Glyco_hydro_7	0	GH7	0	0	0.566	.	.	0.513	0.049	0.246	0.78	1	1	0	0	44276.3	412	7	7.871	18	153	240	97	42	231	92	51	41	1	.	HSIH:55-58,KKFQ:118-121,RAYL:124-127,KNYE:133-136,KEFT:143-146,KDFY:265-268,KPFT:278-281,RKYV:298-301,KNIT:312-315,KGMG:336-339,RGMV:344-347,KNIV:379-382	0	0	0	SignalP3NN:17,SignalP3HMM:17,SignalP4:17,DeepSig:17,SignalP6:17,SignalP5:23,Phobius:23	1	1
XPS78658.1	1.483	2.45	3.264	.	.	.	.	0	0	0	PF00135	Domain:COesterase	0	.	0	0.923	0.577	.	.	0.617	0.102	0.429	0.21	1	1	0	0	13841.8	126	-2	5.522	2	35	71	37	17	76	26	13	13	0.906	VWER:[LIJVAP]X[KRTPEI]R:79-82	HPFV:21-24,HHIE:45-48,RPFT:82-85	0	0	0	SignalP3NN:18,SignalP3HMM:18,SignalP4:18,SignalP5:18,DeepSig:18,Phobius:18,SignalP6:18	1	1
XPS69555.1	1.477	4.039	3.312	.	.	.	.	0	0	0	.	.	0	.	0	0.925	0.498	0.819	.	.	0.014	0.329	0.23	1	1	0	0	15339.7	144	13.5	11.124	0	52	79	40	10	79	36	25	11	0.8	VEPR:[LIJVAP]X[KRTPEI]R:34-37,LNAR:LXXR:88-91,KR:[KR]R:102-103,KR:[KR]R:113-114,KR:[KR]R:124-125,KR:[KR]R:135-136	RTLL:4-7,RSII:47-50,RGFV:91-94,RGWV:103-106,RGYV:114-117,RGYI:125-128,RGFV:136-139	1	0	0	SignalP3NN:18,SignalP3HMM:18,SignalP4:18,SignalP5:18,DeepSig:18,Phobius:18,SignalP6:20	1	1
XPS77074.1	1.472	1.983	2.354	.	.	.	.	0	0	0	.	.	0	.	0	0.989	0.637	.	.	0.637	0.738	0.341	0.31	1	1	0	0	17380.2	160	5	8.173	7	55	85	53	13	95	27	17	10	0.474	RR:[KR]R:44-45,LSVR:LXXR:144-147,RR:[KR]R:155-156	RRLF:44-47,HPLQ:90-93,KVIQ:130-133,RNLC:147-150	0	0	1	SignalP3NN:15,SignalP4:17,SignalP3HMM:19,DeepSig:19	1	1
XPS71400.1	1.471	1.035	3.097	.	.	.	.	0	0	0	PF04185	Family:Phosphoesterase	0	.	0	0	0.458	.	.	0.569	0.851	0.37	0.76	1	1	0	0	42069.5	376	3	7.032	1	104	205	106	52	203	80	44	36	1.325	.	KALF:4-7,KDWV:19-22,KAFD:25-28,KGIS:55-58,KGIS:106-109,KNLT:161-164,RNFL:202-205,KNFM:212-215,HSYA:228-231,KKLV:247-250,HNLG:274-277,RKWS:298-301	0	0	0	SignalP3NN:18,SignalP3HMM:18,SignalP4:18,SignalP5:18,DeepSig:18,Phobius:18,SignalP6:18	1	1
XPS75006.1	1.466	2.237	3.257	.	.	.	.	0	0	0	PF03022	Repeat:MRJP	0	.	0	0	0.331	.	0.5	.	0.874	0.32	0.83	1	1	0	0	45969.2	421	-5.5	5.165	6	140	251	119	52	238	74	36	38	0.99	VDER:[LIJVAP]X[KRTPEI]R:67-70,VIPR:[LIJVAP]X[KRTPEI]R:171-174,RR:[KR]R:218-219,LASR:LXXR:271-274,ASRR:[LIJVAP]X[KRTPEI]R:272-275,RR:[KR]R:274-275,ADKR:[LIJVAP]X[KRTPEI]R:401-404,KR:[KR]R:403-404	HFIL:4-7,RPFG:30-33,HNLY:71-74,RPWP:98-101,RLWV:131-134,KLIS:155-158,RTYV:168-171,RDLL:174-177,HGMN:179-182,RRLF:218-221,RRFY:274-277,RVYI:318-321,RSFR:409-412	0	0	0	SignalP3NN:18,SignalP3HMM:18,SignalP4:18,DeepSig:18,SignalP6:18,SignalP5:20,Phobius:20	1	1
XPS81357.1	1.465	2.457	0.573	.	.	.	.	0	0	0	.	.	0	.	0	0.94	0.701	0.698	.	.	0.95	0.591	0.47	1	1	0	0	26309.8	242	2	7.243	5	88	126	84	14	118	54	29	25	0.959	KR:[KR]R:48-49,ALTR:[LIJVAP]X[KRTPEI]R:52-55,LADR:LXXR:70-73	RSYS:2-5,HAWP:18-21,KRIA:48-51,RKLT:73-76,KKLD:121-124	0	0	1	SignalP3NN:19,SignalP3HMM:19,SignalP4:19,SignalP5:19,DeepSig:19,Phobius:19,SignalP6:19	1	1
XPS74668.1	1.462	0.334	2.957	.	.	.	.	0	0	0	PF18271	Domain:GH131_N	0	GH131	0	0.007	0.452	.	.	0.757	0.511	0.493	0.82	1	1	0	0	28663.6	261	2.5	7.127	1	98	153	61	40	130	46	26	20	1.294	KR:[KR]R:118-119	HQIC:131-134	0	0	0	SignalP3NN:17,SignalP3HMM:17,SignalP4:17,SignalP5:17,DeepSig:17,Phobius:17,SignalP6:17	1	1
XPS80869.1	1.451	2.402	3.309	.	.	.	.	0	0	0	.	.	0	.	0	0.039	0.346	.	0.605	.	0.606	0.408	0.87	1	1	0	0	28722	279	-0.5	6.193	16	129	204	74	23	162	37	19	18	0.6	LNHR:LXXR:21-24	KTLA:4-7,REYC:61-64,KTWA:160-163,KELA:242-245	0	1	0	SignalP3NN:18,SignalP3HMM:18,SignalP4:18,SignalP5:18,DeepSig:18,Phobius:18,SignalP6:18	1	1
XPS75388.1	1.447	-0.151	2.923	.	.	.	.	0	0	0	.	.	0	.	0	0.001	0.428	.	.	0.921	0.938	0.241	0.45	1	1	0	0	38207.5	350	9	8.901	3	116	199	113	47	203	80	47	33	0.888	LYER:[LIJVAP]X[KRTPEI]R&LXXR:54-57,AATR:[LIJVAP]X[KRTPEI]R:344-347	KAIV:2-5,RPLY:41-44,RNFW:63-66,KAMH:67-70,KLFT:78-81,KAWG:116-119,HVLR:122-125,RYFA:242-245,RVLD:260-263	1	0	0	SignalP3NN:17,SignalP3HMM:17,SignalP4:17,SignalP5:17,DeepSig:17,Phobius:17,SignalP6:17	1	1
XPS73332.1	1.443	1.622	2.584	MoCDIP8	.	.	.	0	0	0	PF03372	Domain:Exo_endo_phos	0	.	0	0.07	0.434	.	.	0.842	0.012	0.689	0.46	1	1	0	0	33649.1	309	2.5	7.144	0	97	177	97	32	175	68	37	31	0.716	RR:[KR]R:154-155,RR:[KR]R:169-170	RPWP:52-55,KLLS:129-132,KWLS:136-139,RRYV:154-157,HKLA:238-241	0	0	0	SignalP3NN:19,SignalP3HMM:19,SignalP4:19,SignalP5:19,DeepSig:19,Phobius:19,SignalP6:19	1	1
XPS70922.1	1.43	5.983	3.312	.	.	.	.	0	0	0	.	.	0	.	0	1	0.791	0.689	0.919	.	0.056	0.663	0.72	1	1	0	0	13847.5	129	-8.5	4.134	12	58	89	30	12	69	30	11	19	0.774	.	KHWG:97-100	0	0	0	SignalP3NN:17,SignalP4:17,SignalP5:17,DeepSig:17,SignalP3HMM:24,Phobius:26,SignalP6:26	1	1
XPS68244.1	1.42	3.438	3.312	.	.	.	.	0	0	0	.	.	0	.	0	0.996	0.767	.	.	0.684	0.522	0.436	0.45	1	1	0	0	8715.99	77	1	7.057	5	31	38	20	13	46	16	9	7	0.824	RR:[KR]R:65-66	RKWK:48-51,RRFE:65-68	0	0	0	SignalP3NN:19,SignalP3HMM:19,SignalP4:19,SignalP5:19,DeepSig:19,Phobius:19,SignalP6:19	1	1
XPS81665.1	1.415	2.875	3.199	.	.	.	.	0	0	0	PF05572	Family:Peptidase_M43	0	.	0	0.006	0.483	.	0.642	.	0.171	0.311	0.78	1	1	0	0	29440.5	275	-3	5.548	5	119	164	76	37	149	44	22	22	0.868	AAKR:[LIJVAP]X[KRTPEI]R:16-19,KR:[KR]R:18-19,VVIR:[LIJVAP]X[KRTPEI]R:166-169,AKTR:[LIJVAP]X[KRTPEI]R:226-229	KTLL:4-7,KVYW:60-63,KQLA:84-87,HGIS:96-99,KALR:124-127,HEIG:189-192,HWLG:193-196,HTFQ:199-202,RIYS:263-266	0	0	0	SignalP3NN:17,SignalP3HMM:17,SignalP4:17,SignalP5:17,DeepSig:17,Phobius:17,SignalP6:17	1	1
XPS73292.1	1.413	4.307	2.38	.	.	.	.	0	0	0	PF00085	Domain:Thioredoxin	0	.	0	1	0.708	0.662	.	.	0.778	0.604	0.16	1	1	0	0	17242.2	158	2.5	7.874	2	41	89	59	16	98	38	21	17	1.111	VERR:[LIJVAP]X[KRTPEI]R:124-127,RR:[KR]R:126-127	HPIL:2-5,RAIA:67-70,HAIV:80-83,KKYG:101-104	0	0	0	SignalP3NN:23,SignalP3HMM:23,SignalP4:23,SignalP5:23,DeepSig:23,Phobius:23,SignalP6:23	1	1
XPS74383.1	1.41	5.013	3.312	.	.	.	.	0	0	0	.	.	0	.	0	1	0.652	.	0.794	.	0.719	0.451	0.78	1	1	0	0	7454.46	72	2	7.481	8	38	50	21	8	46	9	6	3	0.5	LAPR:[LIJVAP]X[KRTPEI]R&LXXR:26-29	.	0	0	0	SignalP3NN:16,SignalP3HMM:16,SignalP4:16,SignalP5:16,DeepSig:16,Phobius:21,SignalP6:29	1	1
XPS72699.1	1.396	1.307	3.243	.	.	.	.	0	0	0	PF11937	Family:DUF3455	0	.	0	0.075	0.432	.	.	0.508	0.994	0.614	0.75	1	1	0	0	26097.7	246	8	9.447	3	96	144	74	25	139	38	24	14	0.836	.	HALP:20-23,KLMP:41-44,KLYD:87-90,HHFF:137-140,KWLL:185-188,KSLS:193-196	0	0	0	SignalP3NN:21,SignalP3HMM:21,SignalP4:21,SignalP5:21,DeepSig:21,Phobius:21,SignalP6:21	1	1
XPS74214.1	1.39	2.675	2.18	.	.	.	.	0	0	0	PF03211	Repeat:Pectate_lyase	1	PL3_2,PL3,PL3_5,PL3_4,PL3_1,PL3_3	0	0.032	0.578	.	.	0.536	0.064	0.326	0.26	1	1	0	0	33848.8	307	-7.5	4.702	4	91	168	78	33	168	64	29	35	1.083	LGRR:[LIJVAP]X[KRTPEI]R&LXXR:21-24,RR:[KR]R:23-24,LGGR:LXXR:43-46,PLPR:[LIJVAP]X[KRTPEI]R:47-50,PFPR:[LIJVAP]X[KRTPEI]R:52-55,KR:[KR]R:84-85,ATIR:[LIJVAP]X[KRTPEI]R:112-115,KR:[KR]R:206-207	RPLP:46-49,KRYE:84-87,HALG:128-131,KGLN:151-154,RVIG:158-161,KIFQ:170-173,KFMV:244-247,KEIG:249-252	0	0	0	SignalP3NN:18,SignalP3HMM:18,SignalP4:18,DeepSig:18,Phobius:18,SignalP6:18,SignalP5:20	1	1
XPS77793.1	1.369	5.503	3.132	.	.	.	.	0	0	0	.	.	0	.	0	1	0.79	0.514	0.518	.	0.026	0.443	0.31	1	1	0	0	13092.6	115	9	9.18	9	37	54	32	13	70	23	16	7	1.421	APER:[LIJVAP]X[KRTPEI]R:42-45	RGMP:75-78,KVLV:82-85,RFYC:86-89,RVFS:105-108	0	0	0	SignalP3NN:23,SignalP3HMM:23,SignalP4:23,SignalP5:23,DeepSig:23,Phobius:23,SignalP6:23	1	1
XPS81821.1	1.361	4.651	3.306	MoCDIP1	.	.	.	0	0	0	PF00295	Repeat:Glyco_hydro_28	0	GH28	0	0	0.431	.	0.576	.	0.011	0.4	0.8	1	1	0	0	47871.3	446	-3	5.856	10	160	273	117	50	234	85	43	42	1.462	VEER:[LIJVAP]X[KRTPEI]R:20-23,PSKR:[LIJVAP]X[KRTPEI]R:29-32,KR:[KR]R:31-32,LNFR:LXXR:190-193	HAIA:35-38,KAFP:44-47,KNIL:69-72,KNYT:90-93,KHID:104-107,KDIY:167-170,RPIL:173-176,HGIS:273-276,KNIY:291-294,KVWP:310-313,KNIT:358-361,KNFK:378-381,KKYD:386-389,KNIN:404-407	0	0	0	SignalP3NN:17,SignalP3HMM:17,SignalP4:17,SignalP5:17,DeepSig:17,Phobius:17,SignalP6:23	1	1
XPS81079.1	1.352	4.695	3.31	PtrToxB	.	.	.	0	0	0	PF18224	Domain:ToxB_N	1	.	0	0.096	0.379	.	0.75	.	0.592	0.444	0.81	1	1	0	0	9382.64	91	1.5	7.637	4	42	58	27	7	53	8	5	3	0.955	.	KTII:6-9,RNYN:56-59	0	0	0	SignalP3NN:21,SignalP3HMM:21,SignalP4:21,SignalP5:21,DeepSig:21,Phobius:23,SignalP6:23	1	1
XPS76543.1	1.352	-0.637	3.288	.	.	.	.	0	0	0	PF01341	Domain:Glyco_hydro_6	0	GH6	0	0	0.235	.	.	0.807	0.087	0.33	0.77	1	1	0	0	42004.6	396	4.5	8.411	6	150	237	134	39	237	69	37	32	0.896	IDTR:[LIJVAP]X[KRTPEI]R:91-94,LPGR:LXXR:120-123,KR:[KR]R:359-360	KFYS:57-60,KKYP:155-158,KSLN:199-202,KSLR:242-245,KAYI:279-282,KEWG:312-315,KRYD:359-362	0	1	0	SignalP3NN:18,SignalP3HMM:18,SignalP4:18,SignalP5:18,DeepSig:18,Phobius:18,SignalP6:31	1	1
XPS75622.1	1.352	1.583	3.241	.	.	.	.	0	0	0	PF13472	Domain:Lipase_GDSL_2	0	CE12	0	0.067	0.53	.	.	0.573	0.786	0.414	0.76	1	1	0	0	30048.8	282	2.5	7.321	4	107	172	89	34	169	43	24	19	0.75	.	RAFV:55-58,RSFT:69-72,RNFL:149-152,KVFF:199-202,RLLG:214-217,KTIV:218-221	0	0	0	SignalP3NN:18,SignalP3HMM:18,SignalP4:18,DeepSig:18,SignalP5:19,Phobius:19,SignalP6:19	1	1
XPS72765.1	1.352	2.41	2.93	.	.	.	.	0	0	0	.	.	0	.	0	0.284	0.395	.	0.514	.	0.321	0.407	0.6	1	1	0	0	19859.3	186	-10	4.159	7	73	113	53	18	108	33	12	21	0.66	.	KIIG:45-48,RGFG:158-161	0	0	0	SignalP3NN:16,SignalP4:16,SignalP3HMM:22,SignalP5:22,DeepSig:22,Phobius:22,SignalP6:22	1	1
XPS71550.1	1.35	1.787	3.311	.	.	.	.	0	0	0	.	.	0	.	0	0	0.23	.	0.785	.	0.166	0.691	0.93	1	1	0	0	12890.8	124	6	8.766	6	57	84	32	9	68	11	9	2	0.733	LVTR:[LIJVAP]X[KRTPEI]R&LXXR:72-75	KTLT:57-60,RHLG:75-78	0	1	0	SignalP3NN:19,SignalP3HMM:19,SignalP4:19,SignalP5:19,DeepSig:19,Phobius:19,SignalP6:19	1	1
XPS81603.1	1.344	2.466	2.791	.	.	.	.	0	0	0	.	.	0	.	0	0.113	0.432	.	0.609	.	0.987	0.303	0.7	1	1	0	0	19394.7	181	-4.5	4.442	1	70	111	53	27	109	26	11	15	0.935	KR:[KR]R:106-107,VGER:[LIJVAP]X[KRTPEI]R:150-153	HRLY:155-158,RSMA:172-175	0	0	0	SignalP3NN:18,SignalP3HMM:18,SignalP4:18,SignalP5:18,DeepSig:18,SignalP6:18,Phobius:21	1	1
XPS71287.1	1.332	3.857	3.304	MoCDIP4,ChNIS1,CoNIS1,MoNIS1	.	.	.	0	0	0	PF03443	Family:AA9	1	AA9	0	0.006	0.27	.	0.543	.	0.131	0.298	0.76	1	1	0	0	24166.2	230	6	9.11	2	97	140	68	29	138	28	18	10	0.739	.	KSLI:2-5,RCYQ:58-61,KTYT:69-72,KIYQ:118-121,KSLP:147-150	0	0	0	SignalP3NN:17,SignalP3HMM:17,SignalP4:17,SignalP5:17,DeepSig:17,Phobius:17,SignalP6:17	1	1
XPS81277.1	1.328	3.926	3.308	MoCDIP1	.	.	.	0	0	0	PF00295	Repeat:Glyco_hydro_28	0	GH28	0	0	0.25	.	0.699	.	0.595	0.196	0.88	1	1	0	0	37200.7	366	10.5	8.99	8	167	249	99	26	194	59	36	23	1.146	LDAR:LXXR:23-26	KEWE:82-85,KWWD:112-115,KFFY:127-130,HSMT:132-135,HGLS:225-228,KDIT:275-278	0	0	0	SignalP3NN:18,SignalP3HMM:18,SignalP4:18,SignalP5:18,DeepSig:18,Phobius:25,SignalP6:26	1	1
XPS80389.1	1.327	0.158	2.909	.	.	.	.	0	0	0	PF01400	Domain:Astacin	0	.	0	0.002	0.363	.	.	0.666	0.986	0.271	0.13	1	1	0	0	38268.4	343	-3.5	6.04	8	99	180	99	48	194	91	47	44	0.987	RR:[KR]R:65-66,AKKR:[LIJVAP]X[KRTPEI]R:123-126,KR:[KR]R:125-126,KR:[KR]R:127-128	KEIC:21-24,RRLR:65-68,KIYR:77-80,HSLG:109-112,RQYC:128-131,HQLV:180-183,HELG:195-198,HVFG:199-202,HVLY:215-218,KAMV:232-235,RTFA:251-254,HDFF:257-260,KTWY:337-340	1	0	1	SignalP3NN:20,SignalP3HMM:20,SignalP4:20,SignalP5:20,DeepSig:20,Phobius:20,SignalP6:20	1	1
XPS80877.1	1.326	2.179	3.297	MoCDIP1	.	.	.	0	0	0	PF00295	Repeat:Glyco_hydro_28	0	GH28	0	0	0.329	.	.	0.667	0.024	0.588	0.82	1	1	0	0	47208.6	443	9	8.217	9	166	270	125	48	254	78	46	32	1	LFIR:[LIJVAP]X[KRTPEI]R&LXXR:113-116,KR:[KR]R:144-145	KAFA:62-65,KTWA:83-86,KAWA:92-95,RLLR:149-152,HDII:162-165,HDIM:210-213,KNWR:324-327,HMWT:358-361	0	0	0	SignalP3NN:20,SignalP3HMM:20,SignalP4:20,SignalP5:20,DeepSig:20,Phobius:20,SignalP6:20	1	1
XPS80370.1	1.323	1.794	3.312	.	.	.	.	0	0	0	.	.	0	.	0	0.08	0.227	.	0.617	.	0.295	0.447	0.86	1	1	0	0	22255.3	230	3	10.318	0	104	185	47	7	110	19	11	8	1.151	LKDR:LXXR:89-92	RALG:92-95,RDLA:160-163,KFLG:186-189	0	0	0	SignalP3NN:20,SignalP3HMM:20,SignalP4:20,SignalP5:20,DeepSig:20,Phobius:20,SignalP6:20	1	1
XPS71249.1	1.318	5.088	3.312	.	.	.	.	0	0	0	.	.	0	.	0	0.999	0.679	.	0.584	.	0.949	0.241	0.76	1	1	0	0	37568.9	357	11	8.035	36	139	228	84	19	224	64	38	26	0.642	KR:[KR]R:52-53,PVKR:[LIJVAP]X[KRTPEI]R:167-170,KR:[KR]R:169-170	KLLY:2-5,KCWK:141-144	0	0	0	SignalP3NN:17,SignalP3HMM:17,SignalP4:17,SignalP5:17,DeepSig:17,Phobius:17,SignalP6:19	1	1
XPS80166.1	1.317	3.852	2.555	CfTom1	.	.	.	0	0	0	PF00331	Domain:Glyco_hydro_10	1	GH10	0	0.004	0.413	0.574	.	.	0.205	0.209	0.43	1	1	0	0	37295.1	336	-3.5	5.655	2	91	179	111	35	182	84	42	42	1.208	LAER:[LIJVAP]X[KRTPEI]R&LXXR:19-22,LDTR:[LIJVAP]X[KRTPEI]R&LXXR:237-240	KVLS:2-5,KLLK:30-33,KIYF:37-40,KSIR:100-103,HTLV:105-108,KNIN:118-121,RAWD:150-153,HFYQ:169-172,KLYI:194-197,KKWL:218-221,RELA:252-255,KALF:312-315,RNLQ:333-336	0	0	0	SignalP3NN:15,SignalP4:15,SignalP3HMM:20,SignalP5:20,DeepSig:20,Phobius:20,SignalP6:22	1	1
XPS69201.1	1.31	3.412	3.224	MoHrip2,UvHrip1	.	.	.	0	0	0	PF04681	Family:Bys1	0	.	0	0.044	0.503	.	.	0.511	0.033	0.597	0.79	1	1	0	0	16427.5	151	-1.5	5.955	2	58	88	46	24	86	25	13	12	1.086	.	HTLA:134-137	0	0	1	SignalP3NN:18,SignalP3HMM:18,SignalP4:18,SignalP5:18,DeepSig:18,Phobius:18,SignalP6:18	1	1
XPS71753.1	1.309	2.698	3.264	CfTom1	.	.	.	0	0	0	.	.	0	.	0	0.003	0.511	.	.	0.815	0.066	0.277	0.77	1	1	0	0	33344.9	310	-4	4.979	4	126	191	93	37	173	59	28	31	0.817	KR:[KR]R:274-275	KGFN:20-23,RGYS:34-37,RYFN:41-44,KSLS:47-50,RLYT:59-62,KILV:85-88,RDLG:111-114,RDWI:160-163,KPIG:171-174,RYWK:262-265	0	0	0	SignalP3NN:17,SignalP3HMM:17,SignalP4:17,SignalP5:17,DeepSig:17,Phobius:17,SignalP6:17	1	1
XPS80940.1	1.309	5.143	3.011	.	.	.	.	0	0	0	.	.	0	.	0	0.999	0.748	.	0.595	.	0.98	0.355	0.48	1	1	0	0	9634.24	87	6.5	8.775	6	32	46	29	13	57	16	12	4	0.714	LLGR:LXXR:40-43	RVLP:24-27,RFLG:36-39,RDYF:56-59	0	0	0	SignalP3HMM:15,SignalP4:17,Phobius:17,SignalP3NN:18	1	1
XPS80164.1	1.305	0.532	2.958	.	.	.	.	0	0	0	PF00149	Domain:Metallophos	0	.	0	0.03	0.462	.	.	0.744	0.971	0.358	0.49	1	1	0	0	32231.4	298	-1.5	6.224	2	101	172	81	35	165	65	34	31	0.833	KR:[KR]R:2-3,LVER:[LIJVAP]X[KRTPEI]R&LXXR:113-116	HLLW:5-8,KKFS:39-42,KTIG:68-71,RNMP:116-119,HDMS:127-130,RIMS:136-139,HMWD:141-144,KKLS:152-155,RDFR:201-204,RAYQ:256-259	0	0	0	SignalP3NN:16,SignalP5:16,Phobius:16,SignalP3HMM:18	1	1
XPS71527.1	1.304	1.529	-0.234	.	.	.	.	0	0	0	.	.	0	.	0	0.532	0.767	0.626	.	.	0.918	0.578	0.08	1	1	1	0	22186.2	198	9	9.498	4	65	101	51	25	96	48	30	18	1.353	LTFR:LXXR:35-38,ANER:[LIJVAP]X[KRTPEI]R:39-42,RR:[KR]R:124-125,VWTR:[LIJVAP]X[KRTPEI]R:160-163,LKAR:LXXR:180-183	RCLT:33-36,KGFG:52-55,RVLS:80-83,RRMT:124-127,RYLS:163-166,RVIK:169-172,KPLK:178-181	0	0	0	SignalP3NN:19,SignalP3HMM:19,SignalP4:19,SignalP5:19,DeepSig:19,Phobius:19,SignalP6:19	1	1
XPS70704.1	1.299	-1.571	2.278	.	.	.	.	0	0	0	PF01979	Domain:Amidohydro_1	0	.	0	0	0.25	.	.	0.803	0.042	0.403	0.79	1	1	0	0	39005.2	353	-9	5.244	2	124	197	101	54	185	69	34	35	1.096	.	RTLA:6-9,KIIS:79-82,HGWQ:91-94,KTIG:98-101,HTWS:152-155,RDIM:195-198,KLIT:205-208,REYN:233-236,HYLG:243-246,KLLR:284-287,HSYD:309-312,RIWL:336-339	0	0	0	SignalP3NN:19,SignalP3HMM:19,SignalP4:19,SignalP5:19,DeepSig:19,SignalP6:19,Phobius:29	1	1
XPS70016.1	1.29	2.452	0.464	.	.	.	.	0	0	0	.	.	0	.	0	0.679	0.758	0.841	.	.	0.994	0.455	0.65	1	1	0	0	25392	236	12	10.256	5	91	129	79	15	118	51	32	19	0.962	LEPR:[LIJVAP]X[KRTPEI]R&LXXR:29-32	RSFS:2-5,RVLK:45-48,KKIR:52-55,KSIR:119-122,RQMK:125-128,KGLN:150-153,KKIA:162-165	1	0	0	SignalP3NN:20,SignalP3HMM:20,SignalP4:20,SignalP5:20,DeepSig:20,Phobius:20,SignalP6:20	1	1
XPS67957.1	1.289	-0.699	-1.326	.	.	.	.	0	0	0	.	.	0	.	0	0.195	0.614	0.526	.	.	0.994	0.614	0.46	0	1	0	1	10821.5	100	-1	6.042	1	31	57	36	11	62	15	8	7	0.826	.	RPIG:78-81	0	0	0	SignalP6:20,SignalP3NN:26,SignalP3HMM:26,SignalP4:26,SignalP5:26,Phobius:26	1	1
XPS70417.1	1.285	4.289	3.312	.	.	.	.	0	0	0	.	.	0	.	0	0.816	0.562	.	0.894	.	0.017	0.378	0.9	1	1	0	0	7040.19	68	4	8.675	5	33	45	24	4	41	8	6	2	0.722	.	RQFQ:51-54	0	0	0	SignalP3NN:19,SignalP3HMM:19,SignalP4:19,SignalP5:19,DeepSig:19,Phobius:19,SignalP6:19	1	1
XPS80715.1	1.279	-0.93	2.36	.	.	.	.	0	0	0	.	.	0	GH43_21,GH43_22,GH43_20,GH43_18,GH43_34,GH43_19,GH43,GH43_23,GH159,GH43_24,GH43_26,GH43_16	0	0	0.351	.	.	0.814	0.452	0.533	0.74	1	1	0	0	36802.3	337	0	6.5	0	120	193	99	48	193	64	34	30	0.893	LTPR:[LIJVAP]X[KRTPEI]R&LXXR:25-28,LAQR:LXXR:112-115,AHTR:[LIJVAP]X[KRTPEI]R:190-193,VIER:[LIJVAP]X[KRTPEI]R:259-262	RLFP:2-5,RSIF:119-122,RLIT:136-139,KFYG:169-172,RDFI:193-196,KDYI:202-205,RFLK:227-230,HLLL:280-283,RPYV:292-295,HAWL:334-337	0	1	0	SignalP3NN:15,SignalP3HMM:15,SignalP4:15,SignalP5:15,DeepSig:15,Phobius:15,SignalP6:28	1	1
XPS76611.1	1.277	3.662	3.31	FgXYLA	.	.	.	0	0	0	PF00457	Domain:Glyco_hydro_11	1	GH11,CBM60	0	0.001	0.181	.	0.837	.	0.637	0.448	0.83	1	1	0	0	24010.4	227	7.5	9.499	2	107	148	55	31	123	27	18	9	0.82	LATR:[LIJVAP]X[KRTPEI]R&LXXR:25-28,LTAR:LXXR:33-36,KR:[KR]R:179-180	RSLG:28-31,KGWN:85-88,RTIT:93-96,KGMK:197-200,HNYQ:204-207	0	0	0	SignalP3NN:19,SignalP3HMM:19,SignalP4:19,SignalP5:19,Phobius:19,DeepSig:25,SignalP6:28	1	1
XPS81113.1	1.274	-0.168	3.234	.	.	.	.	0	0	0	PF00544	Repeat:Pectate_lyase_4	0	PL1_4,PL1,PL1_2,PL1_5,PL1_7,PL1_10,PL1_6,PL1_9	0	0	0.213	.	.	0.577	0.377	0.641	0.85	1	1	0	0	41046.4	390	14.5	9.595	6	164	238	116	43	217	74	46	28	1.01	PSTR:[LIJVAP]X[KRTPEI]R:196-199,ITTR:[LIJVAP]X[KRTPEI]R:363-366,LAGR:LXXR:379-382	RFFA:2-5,KDIK:44-47,RVIV:59-62,KTFD:65-68,RILL:92-95,KTIL:123-126,KGII:131-134,KGLS:137-140,HKYV:158-161,HYWV:221-224,KTLL:254-257,HLLE:270-273,RGIF:280-283,KLFG:301-304,KGLS:350-353	0	0	0	SignalP3NN:18,SignalP3HMM:18,SignalP4:18,SignalP5:18,DeepSig:18,Phobius:18,SignalP6:18	1	1
XPS67785.1	1.269	1.628	2.919	CfTom1	.	.	.	0	0	0	PF00332	Domain:Glyco_hydro_17	0	GH17	0	0	0.205	.	.	0.558	0.896	0.612	0.82	1	1	0	0	34181.9	320	-14	4.127	2	118	197	105	37	183	49	18	31	1.037	.	KGFN:22-25,KTLT:36-39,KNLP:49-52,RLYT:61-64,KPIW:234-237,RIYW:261-264	0	0	0	SignalP3NN:19,SignalP3HMM:19,SignalP4:19,SignalP5:19,Phobius:19,SignalP6:19	1	1
XPS70060.1	1.269	0.256	3.12	.	.	.	.	0	0	0	.	.	0	.	0	0.001	0.412	.	.	0.736	0.076	0.231	0.48	1	1	0	0	39643.8	360	-1	6.226	13	117	206	91	41	203	68	35	33	0.928	LKPR:[LIJVAP]X[KRTPEI]R&LXXR:47-50,LKAR:LXXR:78-81,LTYR:LXXR:165-168,LSAR:LXXR:181-184,LTLR:LXXR:218-221	KLLG:2-5,RGWL:81-84,HSFG:121-124,RIFE:246-249	0	0	0	SignalP3NN:17,SignalP3HMM:17,SignalP4:17,SignalP5:17,DeepSig:17,Phobius:17,SignalP6:17	1	1
XPS77914.1	1.267	0.529	3.231	.	.	.	.	0	0	0	PF01341	Domain:Glyco_hydro_6	0	GH6	0	0	0.41	.	.	0.685	0.3	0.314	0.48	1	1	0	0	41291.5	380	4	7.442	4	129	215	120	43	210	88	48	40	0.938	ARTR:[LIJVAP]X[KRTPEI]R:61-64,RR:[KR]R:93-94,LPDR:LXXR:111-114	KKLE:42-45,KDMI:100-103,RLYK:133-136,KDLS:151-154,HLYV:200-203,KKLN:232-235,RGYA:241-244,HFII:289-292	0	1	1	SignalP3NN:20,SignalP3HMM:20,SignalP4:20,SignalP5:20,DeepSig:20,Phobius:20,SignalP6:20	1	1
XPS80256.1	1.267	0.672	3.133	.	.	.	.	0	0	0	PF01344	Repeat:Kelch_1	0	.	0	0.002	0.475	.	.	0.753	0.719	0.414	0.57	1	1	0	0	37196.5	346	7	8.691	4	121	207	103	36	205	68	39	29	0.764	LPMR:LXXR:66-69,PLPR:[LIJVAP]X[KRTPEI]R:89-92,LGGR:LXXR:224-227,PTPR:[LIJVAP]X[KRTPEI]R:258-261	KLLA:29-32,RAMN:92-95,HTLN:134-137,KIIL:161-164,RKWL:193-196,KYMP:203-206,KMYV:220-223,KVYI:272-275	0	1	0	SignalP3NN:19,SignalP3HMM:19,SignalP4:19,SignalP5:19,DeepSig:19,Phobius:19,SignalP6:19	1	1
XPS80635.1	1.265	2.274	3.286	.	.	.	.	0	0	0	.	.	0	.	0	0.026	0.327	.	0.635	.	0.546	0.336	0.81	1	1	0	0	27768.8	264	3	8.097	4	116	176	79	30	149	42	23	19	0.671	LSKR:[LIJVAP]X[KRTPEI]R&LXXR:23-26,KR:[KR]R:25-26,ALKR:[LIJVAP]X[KRTPEI]R:172-175,KR:[KR]R:174-175	KAFD:45-48,KPFT:83-86,HEFA:118-121,RFYT:134-137,KAIV:239-242	0	0	0	SignalP3NN:18,SignalP3HMM:18,SignalP5:18,Phobius:18,SignalP6:26	1	1
XPS80167.1	1.249	1.87	2.86	.	.	.	.	0	0	0	PF10503	Family:Esterase_PHB	0	CE1	0	0.002	0.367	.	0.533	.	0.035	0.314	0.77	1	1	0	0	31774.9	300	5	8.277	5	130	186	85	39	181	43	25	18	0.713	LGKR:[LIJVAP]X[KRTPEI]R&LXXR:19-22,KR:[KR]R:21-22,VPIR:[LIJVAP]X[KRTPEI]R:286-289	RLLA:2-5,KKLA:50-53,KVFV:137-140,KSIT:193-196,KQWA:240-243,KFFG:295-298	0	0	0	SignalP3NN:16,SignalP4:16,SignalP5:16,DeepSig:16,Phobius:16,SignalP3HMM:20,SignalP6:22	1	1
XPS77849.1	1.249	0.601	3.302	.	.	.	.	0	0	0	.	.	0	.	0	0.005	0.408	.	.	0.729	0.882	0.45	0.77	1	1	0	0	25143.7	249	-1.5	5.622	7	113	164	77	17	156	30	15	15	0.585	.	KYIN:2-5,KAME:88-91,KGMV:134-137,KTMA:148-151,KQLA:154-157	0	0	0	SignalP3NN:16,SignalP4:16,SignalP5:22,DeepSig:26,Phobius:26,SignalP6:26,SignalP3HMM:29	1	1
XPS77268.1	1.247	2.72	3.311	.	.	.	.	0	0	0	.	.	0	.	0	0	0.405	.	0.613	.	0.889	0.72	0.75	1	1	0	0	39159.4	369	-8	4.629	11	146	232	98	43	214	65	29	36	0.848	VEKR:[LIJVAP]X[KRTPEI]R:68-71,KR:[KR]R:70-71,LYTR:[LIJVAP]X[KRTPEI]R&LXXR:325-328	RALA:107-110,KNID:139-142,KDLP:247-250,RLFN:268-271,RSWG:328-331	0	0	0	SignalP3NN:16,SignalP3HMM:16,SignalP4:16,SignalP5:16,DeepSig:28,Phobius:28,SignalP6:28	1	1
XPS71805.1	1.246	0.12	3.268	.	.	.	.	0	0	0	PF00300	Domain:His_Phos_1	0	.	0	0	0.36	.	.	0.741	0.019	0.287	0.75	1	1	0	0	38380.2	348	3.5	7.149	8	128	197	93	46	182	72	40	32	1.026	LINR:LXXR:56-59,RR:[KR]R:215-216,LGHR:LXXR:289-292	KQIQ:24-27,RTYP:59-62,KYIK:81-84,HHLI:155-158,RCLD:176-179,KELL:201-204,KSYI:219-222,KNFP:233-236,RVLG:287-290,RTFK:292-295	0	0	0	SignalP3NN:19,SignalP3HMM:19,SignalP4:19,SignalP5:19,DeepSig:19,Phobius:19,SignalP6:19	1	1
XPS69284.1	1.245	0.329	3.25	.	.	.	.	0	0	0	.	.	0	.	0	0	0.272	.	.	0.535	0.786	0.529	0.76	1	1	0	0	40678.9	368	-4.5	4.949	2	106	211	103	47	211	61	29	32	1.284	KR:[KR]R:38-39,LTGR:LXXR:103-106,LRNR:LXXR:359-362	KRFR:38-41,KVFT:142-145,KQFT:233-236,RYIW:257-260,RYWY:301-304	0	0	0	SignalP3NN:17,SignalP3HMM:17,SignalP4:17,SignalP5:17,DeepSig:17,Phobius:17,SignalP6:17	1	1
XPS72058.1	1.244	0.039	3.218	.	.	.	.	0	0	0	PF00246	Domain:Peptidase_M14	0	.	0	0	0.236	.	.	0.574	0.881	0.368	0.74	1	1	0	0	44881.2	411	-1	6.305	4	152	237	122	51	220	85	44	41	1.056	VVPR:[LIJVAP]X[KRTPEI]R:18-21	KFIL:2-5,KLLR:32-35,HVLN:52-55,KIIN:81-84,HSYA:112-115,RDLQ:122-125,RVIT:144-147,HIWG:150-153,REWI:172-175,RLWR:225-228,RNWP:246-249,RGLV:279-282,RGIR:292-295,HSYG:301-304,RTLA:326-329	0	0	0	SignalP3NN:16,SignalP3HMM:16,SignalP4:16,SignalP5:16,DeepSig:16,Phobius:16,SignalP6:16	1	1
XPS69435.1	1.243	0.306	0.888	.	.	.	.	0	0	0	.	.	0	.	0	0.285	0.34	.	0.735	.	0.829	0.5	0.83	1	1	1	0	20189.1	199	3	7.694	11	88	140	68	12	128	14	9	5	0.516	.	RSFA:2-5,KMIG:177-180	0	0	0	SignalP3NN:23,SignalP3HMM:23,SignalP4:23,SignalP5:23,DeepSig:23,Phobius:23,SignalP6:23	1	1
XPS80202.1	1.227	3.675	3.214	CfTom1	.	.	.	0	0	0	PF00331	Domain:Glyco_hydro_10	1	GH10	0	0.001	0.555	.	.	0.528	0.523	0.539	0.24	1	1	0	0	38840.2	353	10	9.258	4	120	190	109	41	196	87	50	37	1.047	LTIR:[LIJVAP]X[KRTPEI]R&LXXR:46-49,ACTR:[LIJVAP]X[KRTPEI]R:145-148,AWER:[LIJVAP]X[KRTPEI]R:288-291,AVKR:[LIJVAP]X[KRTPEI]R:298-301,KR:[KR]R:300-301	KAFR:32-35,RNFI:39-42,KIID:56-59,KKYD:96-99,HTLV:105-108,KTLI:125-128,KLYY:191-194,KSYG:217-220,KAWE:287-290,KGIR:345-348	1	0	0	SignalP3NN:18,SignalP3HMM:18,SignalP4:18,SignalP5:18,DeepSig:18,Phobius:18,SignalP6:18	1	1
XPS74259.1	1.222	5.973	3.312	.	.	.	.	0	0	0	PF06766	Family:Hydrophobin_2	1	.	0	0.999	0.457	0.581	.	.	0.935	0.562	0.77	1	1	0	0	10185.8	99	-6	3.646	8	43	60	41	5	67	10	2	8	0.545	LEER:[LIJVAP]X[KRTPEI]R&LXXR:18-21	.	0	0	0	SignalP3NN:15,SignalP3HMM:15,SignalP4:15,SignalP5:15,DeepSig:15,Phobius:15,SignalP6:21	1	1
XPS73105.1	1.221	-0.492	2.128	.	.	.	.	0	0	0	PF01042	Domain:Ribonuc_L-PSP	0	.	0	0.223	0.317	.	.	0.534	0.037	0.223	0.55	1	1	0	0	15835.3	152	-4	4.378	0	58	90	56	11	96	20	8	12	0.833	.	KGIV:50-53,KNIG:80-83	0	0	0	SignalP3NN:20,SignalP3HMM:20,SignalP4:20,SignalP5:20,DeepSig:20,Phobius:20,SignalP6:20	1	1
XPS68848.1	1.207	1.587	3.246	.	.	.	.	0	0	0	PF00246	Domain:Peptidase_M14	0	.	0	0	0.235	.	0.505	.	0.072	0.559	0.75	1	1	0	0	51657.5	478	2	6.836	1	184	287	134	67	260	95	51	44	1.071	KR:[KR]R:90-91,ARER:[LIJVAP]X[KRTPEI]R:183-186,PKIR:[LIJVAP]X[KRTPEI]R:321-324,KR:[KR]R:362-363	RDIV:34-37,HALL:61-64,KEYE:74-77,RQMV:86-89,KNYG:140-143,KTFN:152-155,RLYL:174-177,KTYT:214-217,RNFD:271-274,RKYF:280-283,RWFM:324-327,KEYI:372-375,RSYT:400-403,RYWA:424-427,KVYG:433-436	0	0	0	SignalP3NN:18,SignalP3HMM:18,SignalP4:18,SignalP5:18,DeepSig:18,Phobius:18,SignalP6:18	1	1
XPS81369.1	1.204	4.098	3.25	.	.	.	.	0	0	0	.	.	0	.	0	0.815	0.572	0.544	.	.	0.007	0.398	0.56	1	1	0	0	24427.5	234	0.5	6.6	4	90	145	63	17	122	54	29	25	0.676	IEER:[LIJVAP]X[KRTPEI]R:140-143,LESR:LXXR:164-167	HVLS:16-19,RPFS:30-33,HLMG:157-160,KPLP:187-190,RSMI:231-234	1	0	0	SignalP3NN:22,SignalP3HMM:22,SignalP4:22,SignalP5:22,DeepSig:22,Phobius:22,SignalP6:22	1	1
XPS73278.1	1.201	1.911	2.937	.	.	.	.	0	0	0	PF12296	Family:HsbA	0	.	0	0.998	0.528	.	.	0.652	0.332	0.533	0.59	1	1	0	0	19685.7	189	2	7.073	0	64	115	83	15	115	31	18	13	0.745	.	RVLA:2-5,HALA:82-85,KSIP:107-110	0	0	1	SignalP3NN:15,SignalP3HMM:15,SignalP4:15,SignalP5:17,Phobius:19,DeepSig:24,SignalP6:24	1	1
XPS68042.1	1.201	3.572	3.068	.	.	.	.	0	0	0	.	.	0	.	0	0.933	0.452	0.799	.	.	0.056	0.585	0.39	1	1	0	0	10637.1	98	-4.5	4.634	0	33	51	34	10	54	25	11	14	0.958	.	HEYN:55-58,KGFA:61-64	0	0	0	SignalP3NN:19,SignalP3HMM:19,SignalP4:19,SignalP5:19,DeepSig:19,Phobius:19,SignalP6:19	1	1
XPS72655.1	1.198	4.414	3.272	.	.	.	.	0	0	0	PF11327	Family:Egh16-like	1	.	0	0.625	0.219	.	0.787	.	0.639	0.628	0.88	1	1	0	0	33050.3	342	3	8.481	2	162	246	97	12	201	52	28	24	0.584	LALR:LXXR:162-165,LVKR:[LIJVAP]X[KRTPEI]R&LXXR:169-172,KR:[KR]R:171-172,IAKR:[LIJVAP]X[KRTPEI]R:336-339,KR:[KR]R:338-339	RSLE:157-160,RSLV:167-170,RSIA:334-337,KRFA:338-341	0	0	0	SignalP3HMM:17,SignalP3NN:18,SignalP4:18,DeepSig:18,SignalP6:18,SignalP5:20,Phobius:20	1	1
XPS69672.1	1.193	1.35	3.299	FoSep1	.	.	.	0	0	0	PF00082,PF05922	Domain:Peptidase_S8,Domain:Inhibitor_I9	0	.	0	0	0.138	.	.	0.621	0.065	0.287	0.85	1	1	0	0	40585.7	396	5.5	8.239	3	171	254	132	37	232	61	35	26	0.759	LQPR:[LIJVAP]X[KRTPEI]R&LXXR:22-25,LGTR:[LIJVAP]X[KRTPEI]R&LXXR:364-367	RFIV:33-36,KLLK:52-55,HVYQ:60-63,KLLR:80-83,KAYV:110-113,KTYG:194-197,KLFA:203-206,KVLD:208-211,KNYL:385-388	0	0	0	SignalP3NN:16,SignalP3HMM:16,SignalP4:16,SignalP5:16,DeepSig:16,Phobius:16,SignalP6:16	1	1
XPS71121.1	1.189	2.468	3.287	.	.	.	.	0	0	0	PF04616	Family:Glyco_hydro_43	0	GH43_6,GH43_5,GH43_3,GH43,GH43_4,GH43_7,GH43_30,GH43_34,GH43_8,GH43_26,GH43_29,GH43_32,GH43_31,GH43_33,GH43_9,GH43_2,GH43_18,GH43_11,GH43_16,GH43_12,GH43_19,GH43_22,GH43_10,GH43_17,GH159,GH43_35	0	0.001	0.397	.	0.576	.	0.036	0.364	0.78	1	1	0	0	34405.3	325	3	7.598	6	137	207	84	44	186	51	28	23	0.867	LVRR:[LIJVAP]X[KRTPEI]R&LXXR:39-42,RR:[KR]R:41-42,VDTR:[LIJVAP]X[KRTPEI]R:298-301	KYYL:100-103,KLYM:159-162,KEYK:236-239,HGWV:272-275,KQFG:309-312	0	0	0	SignalP3NN:20,SignalP3HMM:20,SignalP4:20,SignalP5:20,DeepSig:20,Phobius:20,SignalP6:20	1	1
XPS79813.1	1.177	1.694	3.227	.	.	.	.	0	0	0	.	.	0	.	0	0.005	0.535	.	.	0.513	0.845	0.252	0.62	1	1	0	0	35848.8	326	-3	5.633	4	101	196	68	52	184	70	35	35	1.011	VLPR:[LIJVAP]X[KRTPEI]R:19-22	RDYP:22-25,RFFD:167-170,RNLA:291-294	0	0	0	SignalP3NN:18,SignalP3HMM:18,SignalP4:18,SignalP5:18,DeepSig:18,SignalP6:18,Phobius:21	1	1
XPS71816.1	1.169	2.265	3.07	.	.	.	.	0	0	0	.	.	0	.	0	0	0.393	.	0.506	.	0.386	0.303	0.86	1	1	0	0	37658.5	356	1	6.97	10	140	225	105	38	212	54	28	26	0.878	KR:[KR]R:59-60,LQYR:LXXR:286-289	RGFR:213-216,RWLA:229-232,KDYI:296-299	0	1	0	SignalP3NN:18,SignalP3HMM:18,SignalP4:18,SignalP5:18,DeepSig:18,Phobius:18,SignalP6:18	1	1
XPS76872.1	1.167	-0.912	2.959	.	.	.	.	0	0	0	PF00491	Domain:Arginase	0	.	0	0	0.234	.	.	0.781	0.061	0.347	0.49	1	1	0	0	40246.7	378	-4.5	5.76	3	133	224	133	36	220	87	44	43	0.729	RR:[KR]R:101-102,AGIR:[LIJVAP]X[KRTPEI]R:243-246,PVTR:[LIJVAP]X[KRTPEI]R:248-251,LKKR:[LIJVAP]X[KRTPEI]R&LXXR:284-287,KR:[KR]R:286-287	RDIS:20-23,HCLA:62-65,KQLD:146-149,KVLG:209-212,RDLD:270-273,KVYI:292-295,RELL:321-324,RSLL:363-366	0	0	0	SignalP3NN:19,SignalP3HMM:19,SignalP4:19,SignalP5:19,Phobius:19,SignalP6:19	1	1
XPS69735.1	1.166	-0.646	2.988	.	.	.	.	0	0	0	.	.	0	.	0	0.195	0.163	.	.	0.619	0.017	0.407	0.8	1	1	0	0	20303	195	-4.5	4.518	2	79	124	73	10	104	32	14	18	0.667	LIPR:[LIJVAP]X[KRTPEI]R&LXXR:26-29,AGIR:[LIJVAP]X[KRTPEI]R:125-128	KFFL:140-143,KALL:181-184	0	0	0	SignalP3NN:20,SignalP3HMM:20,SignalP4:20,SignalP5:20,DeepSig:20,Phobius:20,SignalP6:29	1	1
XPS78852.1	1.164	4.167	3.312	.	.	.	.	0	0	0	.	.	0	.	0	0.776	0.559	.	0.759	.	0.023	0.461	0.9	1	1	0	0	9685.13	93	1	7.034	6	39	63	29	7	55	10	6	4	0.909	.	RNLG:66-69,RDFV:74-77	0	0	0	SignalP3NN:22,SignalP3HMM:22,SignalP4:22,SignalP5:22,DeepSig:22,Phobius:29,SignalP6:29	1	1
XPS68571.1	1.162	3.345	3.312	MoCDIP4	.	.	.	0	0	0	PF03443,PF00734	Family:AA9,Domain:CBM_1	1	AA9,CBM1	0	0.001	0.164	.	0.618	.	0.017	0.602	0.93	1	1	0	0	33516.6	328	10.5	9.029	6	150	222	102	33	193	52	33	19	0.67	.	KSIT:70-73,KIWE:119-122,KLLA:134-137,HDLT:147-150,KVWN:230-233	0	0	0	SignalP3NN:18,SignalP3HMM:18,SignalP4:18,SignalP5:18,DeepSig:18,Phobius:18,SignalP6:18	1	1
XPS79833.1	1.16	-0.788	-2.487	GoEC2,BghBEC2,MoCDIP11,MoCDIP2,BghBEC4	.	.	.	0	0	0	PF05730	Domain:CFEM	1	.	0	0.947	0.639	.	.	0.611	0.924	0.707	0.46	0	1	0	1	20492	184	4	7.725	11	64	102	60	21	108	32	19	13	1.333	LLVR:LXXR:178-181	HLLA:15-18,HPLL:48-51,KPIP:95-98,KSYR:102-105	0	0	0	SignalP3NN:22,SignalP3HMM:22,SignalP4:22,SignalP5:22,DeepSig:22,Phobius:22,SignalP6:22	1	1
XPS68224.1	1.156	1.575	3.007	.	.	.	.	0	0	0	.	.	0	.	0	0.007	0.249	.	0.678	.	0.387	0.362	0.74	1	1	0	0	18778.8	178	-4	4.381	1	78	114	54	24	102	24	10	14	1.07	.	RSLF:5-8,RKLF:38-41	0	0	0	SignalP3NN:20,SignalP3HMM:20,SignalP4:20,SignalP5:20,DeepSig:20,Phobius:20,SignalP6:20	1	1
XPS73956.1	1.143	2.43	3.312	.	.	.	.	0	0	0	.	.	0	.	0	0.265	0.294	.	0.89	.	0.187	0.517	0.93	1	1	0	0	8422.62	83	6.5	9.09	6	41	63	23	5	47	9	8	1	0.739	.	KNYS:32-35	0	0	0	SignalP3NN:24,SignalP3HMM:24,SignalP4:24,SignalP5:24,DeepSig:24,Phobius:24,SignalP6:24	1	1
XPS79544.1	1.142	4.296	3.252	PsGIP2,PsGIP1	.	.	.	0	0	0	PF00089	Domain:Trypsin	0	.	0	0.102	0.313	.	0.749	.	0.511	0.457	0.85	1	1	0	0	26291.6	260	-3	5.167	6	114	182	93	18	157	41	20	21	0.584	LTVR:LXXR:82-85,LKLR:LXXR:121-124	KSFI:4-7,RDFI:254-257	0	0	0	SignalP3NN:18,SignalP3HMM:18,SignalP4:18,SignalP5:18,DeepSig:18,Phobius:18,SignalP6:24	1	1
XPS79714.1	1.139	3.689	3.15	.	.	.	.	0	0	0	.	.	0	.	0	0.566	0.545	.	0.55	.	0.366	0.54	0.43	1	1	0	0	20118.8	186	2.5	8.513	0	67	107	61	18	98	36	20	16	1.051	LATR:[LIJVAP]X[KRTPEI]R&LXXR:54-57,LKRR:[LIJVAP]X[KRTPEI]R&LXXR:79-82,KR:[KR]R:80-81,PETR:[LIJVAP]X[KRTPEI]R:146-149,RR:[KR]R:155-156	KSLK:77-80,KFML:89-92,RAIK:98-101,RTYS:149-152,RRFL:155-158,RFFW:180-183	0	1	0	SignalP3NN:18,SignalP3HMM:18,SignalP4:18,SignalP5:18,DeepSig:18,Phobius:18,SignalP6:18	1	1
XPS81452.1	1.137	-0.467	3.301	.	.	.	.	0	0	0	PF00775	Domain:Dioxygenase_C	0	.	0	0	0.123	.	.	0.592	0.988	0.487	0.81	1	1	0	0	39420.7	374	-12.5	4.733	4	139	241	108	42	212	72	33	39	0.654	LAER:[LIJVAP]X[KRTPEI]R&LXXR:33-36,LKSR:LXXR:55-58,LISR:LXXR:62-65,ISRR:[LIJVAP]X[KRTPEI]R:63-66,RR:[KR]R:65-66,KR:[KR]R:76-77,IVKR:[LIJVAP]X[KRTPEI]R:79-82,KR:[KR]R:81-82,IDTR:[LIJVAP]X[KRTPEI]R:152-155,PVPR:[LIJVAP]X[KRTPEI]R:159-162	HDIA:27-30,KAMV:67-70,RGIV:77-80,RDFE:82-85,RGIQ:199-202,HVLA:228-231,KLIT:260-263	0	0	1	SignalP3NN:23,SignalP3HMM:23,SignalP4:23,SignalP5:23,DeepSig:23,Phobius:23,SignalP6:23	1	1
XPS81164.1	1.137	4.389	2.998	CfTom1	.	.	.	0	0	0	PF00331	Domain:Glyco_hydro_10	1	GH10	0	0.001	0.443	0.54	.	.	0.027	0.193	0.41	1	1	0	0	39232.4	350	5.5	8.386	4	104	190	104	46	188	80	44	36	1.23	RR:[KR]R:106-107,LDVR:LXXR:267-270	KYFG:40-43,KQYT:54-57,KWMY:76-79,HNFV:109-112,KHYY:144-147,RKYT:188-191,KLYY:196-199,KSLA:210-213,RSFR:219-222,KKIP:224-227,HFIT:236-239,RNYA:285-288	0	0	0	SignalP3NN:15,SignalP4:15,Phobius:15,SignalP3HMM:20,SignalP5:20,DeepSig:20,SignalP6:20	1	1
XPS68697.1	1.136	0.48	2.698	.	.	.	.	0	0	0	PF00141	Domain:peroxidase	0	AA2	0	0.005	0.49	.	.	0.707	0.972	0.537	0.46	1	1	0	0	37692.8	344	3.5	7.365	6	103	193	107	36	188	81	44	37	1.026	LEQR:LXXR:23-26,AAIR:[LIJVAP]X[KRTPEI]R:104-107	RIIL:4-7,RGIL:38-41,KELT:85-88,RTFV:184-187,KGFS:218-221,HDLA:223-226,KPLD:247-250,KIFV:272-275,KVLS:280-283,KSFV:293-296,KAYF:308-311,KDLR:322-325,KTLP:329-332	0	0	0	SignalP3NN:20,SignalP3HMM:20,SignalP4:20,SignalP5:20,DeepSig:20,Phobius:20,SignalP6:26	1	1
XPS68114.1	1.127	1.303	3.242	.	.	.	.	0	0	0	PF00141	Domain:peroxidase	0	AA2	0	0.026	0.546	.	.	0.709	0.885	0.343	0.64	1	1	0	0	33374.9	318	8	8.688	8	130	192	98	28	177	60	35	25	0.881	VSKR:[LIJVAP]X[KRTPEI]R:32-35,KR:[KR]R:34-35,AAIR:[LIJVAP]X[KRTPEI]R:84-87,KR:[KR]R:304-305	RTIG:35-38,RGLE:114-117,KLFA:185-188,KGFS:190-193,KYFS:230-233,KGLI:289-292	0	0	1	SignalP3NN:19,SignalP3HMM:19,SignalP4:19,SignalP5:19,DeepSig:19,Phobius:19,SignalP6:19	1	1
XPS73165.1	1.122	4.736	3.249	MoCDIP1	.	.	.	0	0	0	PF00295	Repeat:Glyco_hydro_28	0	GH28	0	0	0.434	.	0.545	.	0.726	0.401	0.84	1	1	0	0	46065.4	422	3.5	7.02	10	146	250	108	53	222	75	42	33	1.395	PAIR:[LIJVAP]X[KRTPEI]R:38-41	HQIT:149-152,KGLR:162-165,HSYD:178-181,KNWT:215-218,HGLG:244-247,HAFY:278-281,KTWT:283-286,KNLT:310-313,HGLK:352-355,RKIV:361-364,RGWE:404-407	0	0	0	SignalP3NN:20,SignalP3HMM:20,SignalP4:20,SignalP5:20,Phobius:20,SignalP6:20	1	1
XPS68734.1	1.121	8.338	3.27	.	.	.	.	0	0	0	PF03211	Repeat:Pectate_lyase	1	PL3_2,PL3,PL3_5,PL3_4,PL3_1,PL3_3	0	0.999	0.916	.	0.795	.	0.959	0.666	0.91	1	1	0	0	24784.7	240	2.5	7.451	10	100	159	68	14	126	48	26	22	1.091	IPTR:[LIJVAP]X[KRTPEI]R:23-26	KDMG:43-46,KEYD:48-51,KNFT:145-148,KLYR:154-157	0	0	0	SignalP3NN:18,SignalP3HMM:18,SignalP5:18,SignalP6:18,Phobius:22	1	1
XPS73093.1	1.121	2.86	3.305	MoCDIP1	.	.	.	0	0	0	PF00295	Repeat:Glyco_hydro_28	0	GH28	0	0	0.066	.	0.644	.	0.016	0.576	0.91	1	1	0	0	38477.9	382	-3	5.271	9	183	272	117	25	209	53	26	27	0.865	VVKR:[LIJVAP]X[KRTPEI]R:33-36,KR:[KR]R:35-36	HLLS:2-5,KEWA:96-99,RWWD:126-129,KFFA:141-144,HNLK:146-149,KVYN:212-215,HGLS:239-242,KNIS:294-297,KTYG:367-370	0	0	0	SignalP3NN:19,SignalP3HMM:19,SignalP4:19,SignalP5:19,DeepSig:19,Phobius:19,SignalP6:19	1	1
XPS70834.1	1.115	0.157	2.821	.	.	.	.	0	0	0	PF03575	Domain:Peptidase_S51	0	.	0	0.05	0.402	.	.	0.65	0.006	0.264	0.45	1	1	0	0	31788.8	295	-8	4.66	0	98	168	100	33	173	62	28	34	0.918	RR:[KR]R:86-87,LGAR:LXXR:278-281,IVER:[LIJVAP]X[KRTPEI]R:289-292	RIIT:51-54,RRLG:86-89,HTYD:97-100,RQWR:125-128,HFLV:196-199,RQFD:202-205,KVYP:211-214,KNLP:258-261,RFYF:266-269	0	0	0	SignalP3NN:18,SignalP3HMM:18,SignalP4:18,SignalP5:18,DeepSig:18,Phobius:18,SignalP6:18	1	1
XPS74651.1	1.115	0.797	2.695	.	.	.	.	0	0	0	PF13472	Domain:Lipase_GDSL_2	0	CE12	0	0.197	0.457	.	.	0.59	0.975	0.332	0.56	1	1	0	0	26143.1	247	-4.5	5.069	0	99	153	88	27	138	52	25	27	0.821	LQSR:LXXR:19-22,PLTR:[LIJVAP]X[KRTPEI]R:138-141,LTRR:LXXR:139-142,RR:[KR]R:141-142	KSFR:69-72,KVID:79-82,RVYV:92-95,RTFS:142-145,KVIE:148-151,HWIN:170-173	0	0	0	SignalP3NN:23,SignalP3HMM:23,SignalP4:23,SignalP5:23,DeepSig:23,Phobius:23,SignalP6:23	1	1
XPS74053.1	1.114	0.968	2.399	.	.	.	.	0	0	0	PF02265	Domain:S1-P1_nuclease	0	.	0	0.013	0.616	.	.	0.575	0.067	0.265	0.46	1	1	0	0	36232.8	334	4.5	7.427	6	118	192	111	40	186	77	43	34	0.905	KR:[KR]R:201-202,LSKR:[LIJVAP]X[KRTPEI]R&LXXR:301-304,KR:[KR]R:303-304,KR:[KR]R:318-319	KKFA:42-45,RLLN:47-50,HYID:80-83,KALK:129-132,KTWT:210-213,KGLK:214-217,KQIA:267-270,REFA:304-307	1	0	0	SignalP3NN:20,SignalP3HMM:20,SignalP5:20,Phobius:20,SignalP6:20	1	1
XPS81014.1	1.108	-0.99	2.765	.	.	.	.	0	0	0	PF15892	Repeat:BNR_4	0	PL42,PL24	0	0	0.202	.	.	0.668	0.026	0.323	0.75	1	1	0	0	47682.4	436	6	8.062	1	154	247	119	60	237	81	46	35	1.082	LGRR:[LIJVAP]X[KRTPEI]R&LXXR:76-79,RR:[KR]R:78-79,LAYR:LXXR:347-350,LFVR:LXXR:414-417	KFLS:2-5,KSYN:27-30,KHYV:71-74,RQIS:79-82,KTIP:139-142,HSLP:155-158,HRYS:197-200,KYLA:211-214,HDFY:248-251,RTWK:260-263,KIYS:282-285,HALM:307-310,HYLR:322-325,KKLG:387-390,KKFN:407-410	0	0	0	SignalP3NN:20,SignalP3HMM:20,SignalP4:20,SignalP5:20,DeepSig:20,Phobius:20,SignalP6:20	1	1
XPS75947.1	1.105	2.278	3.255	FGL1,RsAGLIP1	.	.	.	0	0	0	PF01764	Family:Lipase_3	1	.	0	0.007	0.378	.	.	0.724	0.18	0.371	0.76	1	1	0	0	32529	307	0.5	6.62	7	123	186	101	30	180	51	27	24	0.738	LSGR:LXXR:23-26,AQPR:[LIJVAP]X[KRTPEI]R:29-32,LLQR:LXXR:42-45,LTFR:LXXR:264-267	KTIA:75-78,KELI:95-98,RSIA:141-144,HSLG:168-171,RCFG:267-270,HLMY:289-292	0	0	1	SignalP3NN:18,SignalP3HMM:18,SignalP4:18,SignalP5:18,DeepSig:18,Phobius:25,SignalP6:26	1	1
XPS69188.1	1.1	4.597	3.304	.	.	.	.	0	0	0	PF06766	Family:Hydrophobin_2	1	.	0	0.7	0.246	.	0.545	.	0.952	0.406	0.86	1	1	0	0	9786.23	99	-4	3.939	8	55	70	41	2	62	10	3	7	0.29	LVSR:LXXR:30-33	.	0	0	0	SignalP4:17,SignalP3NN:19,SignalP3HMM:19,SignalP5:19,DeepSig:19,Phobius:19,SignalP6:23	1	1
XPS75929.1	1.091	3.929	3.297	Foa1	.	.	.	0	0	0	.	.	0	.	0	0.383	0.551	.	.	0.639	0.961	0.402	0.25	1	1	0	0	29805.3	272	1.5	6.91	9	99	154	69	25	135	58	31	27	1.019	LLSR:LXXR:64-67,LEKR:[LIJVAP]X[KRTPEI]R&LXXR:69-72,KR:[KR]R:71-72,IGPR:[LIJVAP]X[KRTPEI]R:94-97,RR:[KR]R:155-156	RSLE:67-70,REWH:97-100,RCLQ:102-105,RQYG:156-159,RTIQ:161-164,RKFV:198-201,KVLN:215-218,HNFV:244-247	1	0	0	SignalP3NN:19,SignalP3HMM:19,SignalP4:19,DeepSig:19,Phobius:19,SignalP6:19,SignalP5:21	1	1
XPS75445.1	1.089	-1.51	3.033	.	.	.	.	0	0	0	PF10282	Repeat:Lactonase	0	.	0	0	0.048	.	.	0.728	0.686	0.364	0.81	1	1	0	0	35352	337	15.5	10.007	2	148	215	95	35	185	51	36	15	0.656	LHIR:[LIJVAP]X[KRTPEI]R&LXXR:279-282,LTNR:LXXR:288-291,RR:[KR]R:318-319,LTTR:[LIJVAP]X[KRTPEI]R&LXXR:323-326	KALY:63-66,KSFI:115-118,HVFP:165-168,HRIT:188-191,KTLS:259-262,KKFA:294-297,RSMS:328-331	1	0	0	SignalP3NN:18,SignalP4:18,SignalP5:18,SignalP3HMM:23,Phobius:23	1	1
XPS81516.1	1.068	1.028	3.268	.	.	.	.	0	0	0	.	.	0	.	0	0	0.113	.	0.54	.	0.125	0.275	0.84	1	1	0	0	40569.4	376	-6	5.07	5	143	232	105	50	203	62	30	32	1.278	.	KLYM:59-62,KIIK:130-133,KTIY:140-143,HAIA:160-163,KLLV:227-230,KYLG:308-311,KGFY:321-324	0	0	0	SignalP3NN:19,SignalP3HMM:19,SignalP4:19,SignalP5:19,DeepSig:19,Phobius:19,SignalP6:19	1	1
XPS69851.1	1.067	-0.61	1.003	.	.	.	.	0	0	0	.	.	0	.	0	0	0.626	.	.	0.665	0.096	0.549	0.44	1	1	0	0	12907.5	114	7	8.679	10	42	59	31	14	75	15	11	4	1	AFRR:[LIJVAP]X[KRTPEI]R:26-29,RR:[KR]R:28-29,RR:[KR]R:31-32,LFLR:LXXR:62-65	RSLL:2-5,RPFM:67-70,RLMM:105-108	0	0	1	SignalP6:15,SignalP3NN:18,SignalP3HMM:18,SignalP4:18,SignalP5:18,Phobius:18	1	1
XPS74071.1	1.066	-1.29	3.214	.	.	.	.	0	0	0	PF18271	Domain:GH131_N	0	GH131	0	0	0.101	.	.	0.839	0.946	0.556	0.81	1	1	0	0	38559.4	375	-9	4.786	0	176	252	122	42	205	65	30	35	0.655	.	KVYY:111-114,HQIA:132-135,KEFI:362-365	0	0	0	SignalP3NN:17,SignalP4:17,SignalP5:17,DeepSig:17,Phobius:17,SignalP6:17	1	0
XPS81604.1	1.064	-0.56	3.211	.	.	.	.	0	0	0	.	.	0	.	0	0	0.251	.	.	0.833	0.778	0.322	0.64	1	1	0	0	37670.4	364	-8	4.512	4	138	226	111	24	217	46	20	26	0.5	LPIR:[LIJVAP]X[KRTPEI]R&LXXR:63-66,ASTR:[LIJVAP]X[KRTPEI]R:220-223,KR:[KR]R:333-334	KPMG:40-43	0	0	0	SignalP3NN:15,SignalP3HMM:15,SignalP4:15,SignalP5:15,DeepSig:15,Phobius:15,SignalP6:15	1	1
XPS71330.1	1.057	2.904	1.103	.	.	.	.	0	0	0	.	.	0	.	0	0.942	0.703	0.789	.	.	0.247	0.273	0.59	1	1	0	0	9702.13	91	1	7.134	2	36	51	33	5	47	20	11	9	0.905	.	KALF:26-29,KTLC:67-70	0	0	0	SignalP3HMM:20,Phobius:20,SignalP3NN:22	1	1
XPS78738.1	1.056	3.793	3.185	.	.	.	.	0	0	0	PF00188	Domain:CAP	1	.	0	0.441	0.522	.	.	0.538	0.007	0.312	0.24	1	1	0	0	24009.6	211	-3	5.963	6	68	115	52	39	118	58	30	28	0.727	IKPR:[LIJVAP]X[KRTPEI]R:23-26,RR:[KR]R:53-54,AARR:[LIJVAP]X[KRTPEI]R:70-73,RR:[KR]R:72-73,ATKR:[LIJVAP]X[KRTPEI]R:198-201,KR:[KR]R:200-201	KSLT:2-5,HEIK:21-24,RALF:26-29,HWFW:49-52,RRLH:53-56,RDIS:73-76,HGWH:113-116,RFYC:164-167	0	0	0	SignalP3NN:17,SignalP3HMM:17,SignalP4:17,SignalP5:17,DeepSig:17,Phobius:17,SignalP6:17	1	1
XPS81826.1	1.045	0.37	3.026	.	.	.	.	0	0	0	.	.	0	GH43_21,GH43_22,GH43_18,GH43_20,GH43_34,GH43_19,GH43,GH43_24	0	0	0.33	.	.	0.562	0.994	0.7	0.71	1	1	0	0	36712	335	9.5	9.671	0	131	200	87	50	174	60	36	24	1.137	KR:[KR]R:27-28,KR:[KR]R:251-252	RFIS:2-5,HYMI:93-96,RGIV:118-121,RLYD:168-171,KDFN:192-195,KDYV:201-204,RFIK:227-230,HILL:279-282,KEYA:324-327	0	1	0	SignalP3NN:20,SignalP3HMM:20,SignalP4:20,SignalP5:20,DeepSig:20,Phobius:20,SignalP6:28	1	1
XPS79402.1	1.04	-1.734	1.138	BghBEC4,MoCDIP11,MoCDIP2,GoEC2,BghBEC2	.	.	.	0	0	0	PF05730	Domain:CFEM	1	.	0	0	0.014	.	.	0.752	0.191	0.663	0.87	1	1	0	0	18167.1	198	-0.5	5.567	10	136	160	81	5	117	10	5	5	0.329	.	.	0	0	0	SignalP3NN:18,SignalP3HMM:18,SignalP4:18,SignalP5:18,DeepSig:18,Phobius:18,SignalP6:18	1	1
XPS81015.1	1.031	-0.064	3.191	.	.	.	.	0	0	0	.	.	0	.	0	0.063	0.253	.	.	0.608	0.184	0.389	0.47	1	1	0	0	8428.45	80	-2.5	4.382	0	33	46	27	11	50	10	4	6	0.667	.	RAFP:37-40	0	0	0	SignalP3NN:17,SignalP3HMM:17,SignalP4:17,SignalP5:17,DeepSig:17,Phobius:17,SignalP6:17	1	1
XPS77057.1	1.029	3.954	3.276	.	.	.	.	0	0	0	.	.	0	.	0	0.468	0.556	0.752	.	.	0.768	0.307	0.35	1	1	0	0	18179.8	171	1	7.788	2	62	90	56	5	91	29	15	14	0.732	VTPR:[LIJVAP]X[KRTPEI]R:20-23,VRER:[LIJVAP]X[KRTPEI]R:98-101,LVGR:LXXR:147-150	RKIT:34-37,KGLI:132-135,KILE:142-145	0	0	0	SignalP3NN:16,SignalP3HMM:16,SignalP4:16,SignalP5:16,DeepSig:16,Phobius:16,SignalP6:16	1	1
XPS73593.1	1.026	1.336	3.229	.	.	.	.	0	0	0	PF13472	Domain:Lipase_GDSL_2	0	CE12	0	0.003	0.172	.	0.675	.	0.034	0.401	0.89	1	1	0	0	27741.1	270	4.5	8.025	5	127	180	81	29	155	41	24	17	0.77	IEKR:[LIJVAP]X[KRTPEI]R:25-28,KR:[KR]R:27-28	KAIG:68-71,RSYT:76-79,HTYP:139-142,KALI:150-153,KVII:158-161,KTLG:211-214,HTLP:229-232,KSFV:240-243,KGLQ:244-247	0	0	0	SignalP6:17,SignalP3NN:19,SignalP3HMM:19,SignalP4:19,SignalP5:19,DeepSig:19,Phobius:19	1	1
XPS75705.1	1.023	3.715	1.96	.	.	.	.	0	0	0	.	.	0	.	0	0.449	0.769	0.767	.	.	0.885	0.372	0.15	1	1	0	0	7469.51	69	2	8.732	0	26	39	20	8	39	15	9	6	0.65	ARTR:[LIJVAP]X[KRTPEI]R:37-40	KSFL:6-9	0	0	0	SignalP3HMM:23,Phobius:23,SignalP3NN:27,SignalP4:27	1	1
XPS77386.1	1.021	1.464	3.095	.	.	.	.	0	0	0	.	.	0	.	0	0.221	0.504	.	.	0.529	0.253	0.427	0.57	1	1	0	0	22223.9	206	-3	4.93	2	66	126	58	23	120	38	18	20	0.774	LEER:[LIJVAP]X[KRTPEI]R&LXXR:25-28	HVFD:44-47,KSLP:80-83,RFWL:89-92,KGWG:128-131	0	0	0	SignalP3NN:20,SignalP3HMM:20,SignalP4:20,SignalP5:20,DeepSig:20,Phobius:20,SignalP6:20	1	1
XPS73815.1	1.019	-0.236	3.048	.	.	.	.	0	0	0	PF10282	Repeat:Lactonase	0	.	0	0	0.231	.	.	0.549	0.172	0.44	0.89	1	1	0	0	41998.3	396	13	9.614	2	151	241	114	41	215	73	45	28	0.99	AGPR:[LIJVAP]X[KRTPEI]R:211-214,LLPR:[LIJVAP]X[KRTPEI]R&LXXR:330-333,IVKR:[LIJVAP]X[KRTPEI]R:356-359,KR:[KR]R:358-359	KKLY:64-67,KGIL:79-82,KSFI:117-120,KPLQ:141-144,KTLY:206-209,KQII:264-267,KPYD:303-306,RSFE:333-336	0	0	0	SignalP3NN:19,SignalP3HMM:19,SignalP4:19,SignalP5:19,Phobius:19	1	1
XPS75235.1	1.018	2.075	3.132	MoCDIP1	.	.	.	0	0	0	PF00295	Repeat:Glyco_hydro_28	0	GH28	0	0	0.247	.	.	0.506	0.369	0.681	0.78	1	1	0	0	49063	451	-4	5.438	9	142	279	131	49	240	93	46	47	1.632	LLPR:[LIJVAP]X[KRTPEI]R&LXXR:40-43,ITIR:[LIJVAP]X[KRTPEI]R:62-65	RSIS:2-5,KKIT:60-63,KNLK:95-98,KKLD:103-106,KYWQ:128-131,KSIT:141-144,KIYS:154-157,KFYR:186-189,KNLW:282-285,KDYI:304-307,KAWA:327-330,KDIH:345-348	1	0	0	SignalP3NN:19,SignalP3HMM:19,SignalP4:19,SignalP5:19,DeepSig:19,Phobius:19,SignalP6:21	1	1
XPS80677.1	1.017	2.691	3.311	.	.	.	.	0	0	0	PF00840	Domain:Glyco_hydro_7	0	GH7	0	0	0.388	.	0.793	.	0.715	0.277	0.89	1	1	0	0	48840.4	453	-3	5.447	18	179	279	93	52	244	79	39	40	1.038	KR:[KR]R:316-317	KAIL:2-5,RWLH:55-58,KSLC:76-79,KFIT:112-115,RTYL:126-129,KLIG:140-143,RDLK:191-194,KNFY:284-287,KKMT:297-300,KRFY:316-319,KVIP:324-327,KAMA:371-374	0	0	0	SignalP3NN:14,SignalP3HMM:14,SignalP4:14,SignalP5:14,DeepSig:14,Phobius:14,SignalP6:14	1	1
XPS78636.1	1.012	1.457	2.757	.	.	.	.	0	0	0	.	.	0	.	0	0.199	0.566	.	.	0.508	0.203	0.542	0.72	1	1	0	0	20625.2	186	-2	5.584	1	61	105	52	26	104	34	17	17	1.049	LPAR:LXXR:183-186	HTIE:63-66,RQIG:88-91,HHYF:175-178	0	0	0	SignalP3NN:19,SignalP4:19,SignalP5:19,DeepSig:19,SignalP6:19,SignalP3HMM:28,Phobius:28	1	1
XPS74057.1	1.011	2.109	3.089	.	.	.	.	0	0	0	PF13343	Family:SBP_bac_6	0	.	0	0	0.372	0.505	.	.	0.033	0.444	0.44	1	1	0	0	40142.2	360	-1	6.309	0	107	192	104	48	190	87	45	42	1.086	KR:[KR]R:117-118	RSID:33-36,HYLK:62-65,HDYP:111-114,KDFT:169-172,HSFR:245-248,KLLH:283-286,KNMG:296-299,KILN:314-317,KFMA:328-331,KLFF:340-343	0	0	0	SignalP3NN:17,SignalP3HMM:17,SignalP4:17,SignalP5:17,DeepSig:17,Phobius:17,SignalP6:17	1	1
XPS69824.1	1.011	-0.229	3.234	.	.	.	.	0	0	0	PF10503	Family:Esterase_PHB	0	CE1	0	0.002	0.37	.	.	0.904	0.221	0.414	0.64	1	1	0	0	35382.4	331	8	8.477	6	120	192	107	36	194	60	36	24	0.753	KR:[KR]R:154-155,LNKR:[LIJVAP]X[KRTPEI]R&LXXR:177-180,KR:[KR]R:179-180,LGNR:LXXR:210-213,RR:[KR]R:213-214	HVLA:4-7,HNIT:38-41,RQYI:54-57,RIFV:135-138,KRIY:154-157,KRFA:179-182,RRLP:213-216,HGLS:221-224,RAIK:287-290,HGWP:294-297,KKWT:327-330	0	1	0	SignalP3NN:18,SignalP3HMM:18,SignalP4:18,SignalP5:18,DeepSig:18,Phobius:18,SignalP6:18	1	1
XPS72772.1	1.01	-1.247	3.085	.	.	.	.	0	0	0	PF09284,PF14683,PF14686	Domain:RhgB_N,Domain:CBM-like,Domain:fn3_3	0	PL4_1,PL4	0	0	0.034	.	.	0.567	0.077	0.642	0.8	1	1	0	0	60450.3	550	20	9.781	1	182	319	145	73	303	109	67	42	1.283	LVFR:LXXR:102-105,LVRR:[LIJVAP]X[KRTPEI]R&LXXR:215-218,RR:[KR]R:217-218,LFAR:LXXR:263-266,ASKR:[LIJVAP]X[KRTPEI]R:284-287,KR:[KR]R:286-287	RFLT:2-5,KNYV:28-31,KQFS:81-84,HDLV:100-103,RYIV:126-129,KVIE:152-155,HTYS:167-170,KHYS:171-174,RTMD:180-183,RSLV:213-216,KALP:329-332,KGFL:386-389,KDIN:432-435,KSFK:451-454,RSLT:489-492,REYQ:517-520	0	0	0	SignalP3NN:19,SignalP3HMM:19,SignalP4:19,SignalP5:19,DeepSig:19,Phobius:19,SignalP6:19	1	1
XPS70053.1	1.009	1.356	1.639	.	.	.	.	0	0	0	PF00085,PF07749	Domain:Thioredoxin,Domain:ERp29	0	.	0	0.001	0.449	0.744	.	.	0.995	0.669	0.19	1	1	0	0	39544	365	5.5	8.408	4	121	199	112	39	197	100	54	46	1.056	LFNR:LXXR:2-5,LGKR:[LIJVAP]X[KRTPEI]R&LXXR:92-95,KR:[KR]R:94-95,KR:[KR]R:327-328,LISR:LXXR:346-349	RILP:5-8,KNFD:33-36,KNLA:59-62,KSLG:90-93,KRFG:94-97,KWFD:105-108,RDLE:121-124,KFIT:128-131,KTLA:179-182,KALA:211-214,KFFK:226-229,KVFQ:310-313,KEYA:319-322,KRLQ:327-330,RKFL:354-357	0	0	0	SignalP3NN:20,SignalP3HMM:20,SignalP4:20,SignalP5:20,DeepSig:20,SignalP6:20,Phobius:26	1	1
XPS80115.1	1.007	0.224	0	.	.	.	.	0	0	0	.	.	0	.	0	0.265	0.537	.	0.714	.	0.087	0.246	0.82	1	1	1	0	27607.7	270	1.5	7.161	5	117	182	75	21	160	39	21	18	0.639	VLPR:[LIJVAP]X[KRTPEI]R:37-40,LERR:[LIJVAP]X[KRTPEI]R&LXXR:51-54,RR:[KR]R:53-54	HSLE:49-52,RAYG:96-99,KGLV:119-122,RFYN:154-157,KYIN:194-197,KSLV:210-213,KNLV:222-225	0	0	0	SignalP3NN:19,SignalP3HMM:19,SignalP4:19,SignalP5:19,DeepSig:19,Phobius:19,SignalP6:19	1	1
XPS79631.1	1.006	0.834	3.311	.	.	.	.	0	0	0	.	.	0	.	0	0	0.048	.	0.688	.	0.195	0.288	0.85	1	1	0	0	15403.5	156	0.5	6.847	6	78	111	48	11	102	9	5	4	0.482	.	HGFP:125-128	0	0	0	SignalP3NN:19,SignalP3HMM:19,SignalP4:19,SignalP5:19,DeepSig:19,Phobius:19,SignalP6:19	1	1
XPS77174.1	0.991	5.107	2.739	ZtNIP2	.	.	.	0	0	0	PF02221	Domain:E1_DerP2_DerF2	1	.	0	0.913	0.432	0.781	.	.	0.022	0.314	0.26	1	1	0	0	18518.3	170	-7	4.511	4	48	91	54	12	95	44	19	25	0.974	.	REIP:138-141	0	0	0	SignalP3NN:18,SignalP3HMM:18,SignalP4:18,SignalP5:18,DeepSig:18,Phobius:18,SignalP6:18	1	1
XPS77779.1	0.981	2.964	3.131	.	.	.	.	0	0	0	.	.	0	.	0	0.107	0.461	.	0.71	.	0.833	0.531	0.65	1	1	0	0	21031.6	199	-1.5	5.176	6	84	120	55	15	110	29	14	15	0.68	LISR:LXXR:18-21,LCSR:LXXR:99-102,LGQR:LXXR:138-141	RVFE:144-147,RQIC:160-163	0	1	0	SignalP4:14,SignalP5:14,Phobius:14,SignalP3HMM:16,SignalP3NN:17,DeepSig:17,SignalP6:21	1	1
XPS80984.1	0.98	3.225	3.312	.	.	.	.	0	0	0	.	.	0	.	0	0.689	0.375	0.51	.	.	0.97	0.6	0.5	1	1	0	0	7295.27	66	-1	4.854	0	24	38	23	7	37	15	7	8	0.889	IAKR:[LIJVAP]X[KRTPEI]R:28-31,KR:[KR]R:30-31,VQKR:[LIJVAP]X[KRTPEI]R:44-47,KR:[KR]R:46-47	KRMP:30-33,RAWY:51-54	0	0	0	SignalP3NN:20,SignalP3HMM:20,SignalP4:20,SignalP5:20,DeepSig:20,Phobius:20,SignalP6:20	1	1
XPS78597.1	0.977	2.262	2.888	.	.	.	.	0	0	0	.	.	0	.	0	0.833	0.21	0.787	.	.	0.987	0.62	0.41	1	1	0	0	19752.9	191	-6	4.503	0	72	123	82	5	105	48	21	27	0.507	KR:[KR]R:22-23,LRAR:LXXR:55-58,VTKR:[LIJVAP]X[KRTPEI]R:92-95,KR:[KR]R:94-95,ATKR:[LIJVAP]X[KRTPEI]R:126-129,KR:[KR]R:128-129,IQKR:[LIJVAP]X[KRTPEI]R:157-160,KR:[KR]R:159-160,LAKR:[LIJVAP]X[KRTPEI]R&LXXR:185-188,KR:[KR]R:187-188	KRWL:187-190	0	0	0	SignalP3NN:18,SignalP3HMM:18,SignalP4:18,SignalP5:18,Phobius:18,DeepSig:21,SignalP6:23	1	1
XPS79155.1	0.973	3.728	1.499	.	.	.	.	0	0	0	PF04777	Family:Evr1_Alr	0	.	0	0.994	0.775	0.854	.	.	0.161	0.396	0.05	1	1	0	0	20180	183	7.5	8.493	6	63	90	55	24	102	49	30	19	0.735	LFQR:LXXR:109-112,VNKR:[LIJVAP]X[KRTPEI]R:151-154,KR:[KR]R:153-154	HAIA:61-64,KLMH:82-85,RSYV:104-107,HLFQ:108-111,RLYP:112-115,KKYP:128-131,KRLK:153-156	0	0	0	SignalP3HMM:27,SignalP3NN:32,SignalP4:32,Phobius:37	1	1
XPS70621.1	0.962	-0.827	2.407	.	.	.	.	0	0	0	PF00150	Domain:Cellulase	0	GH5_23,GH5_9,GH5,GH5_22,GH5_44,GH5_46,GH5_15,GH5_45,GH5_54,GH5_50,GH5_14,GH5_49,GH5_8,GH5_4,GH5_36,GH5_5,GH5_33,GH5_47	0	0	0.291	.	.	0.684	0.607	0.36	0.83	1	1	0	0	43604.2	398	3.5	7.627	6	137	232	115	57	227	70	38	32	1.191	VIKR:[LIJVAP]X[KRTPEI]R:27-30,KR:[KR]R:29-30,VLER:[LIJVAP]X[KRTPEI]R:86-89,LERR:LXXR:87-90,RR:[KR]R:89-90,RR:[KR]R:336-337	KNFK:38-41,RRYA:89-92,KNIA:138-141,HKMH:148-151,HALP:157-160,KALA:193-196,RDFT:219-222,HNYY:285-288,KNLN:338-341	0	0	0	SignalP3NN:24,SignalP3HMM:24,SignalP4:24,SignalP5:24,DeepSig:24,Phobius:24,SignalP6:24	1	1
XPS78526.1	0.957	0.155	0.892	.	.	.	.	0	0	0	.	.	0	.	0	0	0.407	0.584	.	.	0.177	0.43	0.62	1	1	1	0	13915.3	143	-2	4.385	0	76	97	48	5	100	10	4	6	0.241	.	KSLA:5-8	0	0	0	SignalP4:20,SignalP6:20,SignalP3NN:22,SignalP3HMM:22,SignalP5:22,DeepSig:22,Phobius:37	1	1
XPS74997.1	0.955	1.944	3.074	.	.	.	.	0	0	0	PF00332	Domain:Glyco_hydro_17	0	GH17	0	0.013	0.332	0.592	.	.	0.009	0.656	0.49	1	1	0	0	33183.1	309	-6.5	4.832	4	121	183	84	38	171	75	35	40	0.94	AIKR:[LIJVAP]X[KRTPEI]R:50-53,KR:[KR]R:52-53	KRLS:52-55,RGYS:61-64,KNIM:72-75,KDLK:99-102,KGIK:148-151,KAIH:191-194,HFYQ:247-250,KKFS:299-302	0	0	0	SignalP3NN:20,SignalP3HMM:20,SignalP4:20,SignalP5:20,Phobius:20,SignalP6:20	1	1
XPS69413.1	0.949	-2.097	2.971	.	.	.	.	0	0	0	PF01425	Family:Amidase	0	.	0	0	0.009	.	.	0.884	0.982	0.539	0.85	1	1	0	0	66137.3	619	-15	4.577	4	235	370	194	73	373	104	46	58	0.806	LIAR:LXXR:341-344,LAGR:LXXR:602-605,LYRR:[LIJVAP]X[KRTPEI]R&LXXR:614-617,RR:[KR]R:616-617	RFLR:2-5,RLYS:140-143,RLYF:180-183,KPLA:189-192,KDIY:199-202,KGLR:205-208,RAWY:214-217,KMIT:243-246,HGLV:321-324,HTMP:328-331,KIWK:347-350,KTLA:372-375,KTMF:486-489,RNIY:522-525	0	0	0	SignalP3NN:20,SignalP3HMM:20,SignalP4:20,SignalP5:20,DeepSig:20,Phobius:20,SignalP6:20	1	1
XPS70880.1	0.949	-1.401	3.301	.	.	.	.	0	0	0	.	.	0	.	0	0.012	0.045	.	.	0.811	0.942	0.472	0.8	1	1	0	0	23417.3	232	-4.5	4.712	5	114	160	87	23	148	35	16	19	0.476	.	KSFD:85-88,RMMA:128-131,KSFG:174-177,HNFL:204-207	0	0	0	SignalP3NN:19,SignalP3HMM:19,SignalP4:19,SignalP5:19,DeepSig:19,Phobius:19,SignalP6:19	1	1
XPS73299.1	0.949	0.059	3.312	.	.	.	.	0	0	0	.	.	0	.	0	0.618	0.202	.	.	0.721	0.106	0.474	0.64	1	1	0	0	18459.7	180	14.5	11.816	1	82	122	41	9	100	35	25	10	0.352	KR:[KR]R:73-74,ARRR:[LIJVAP]X[KRTPEI]R:76-79,RR:[KR]R:77-78,KR:[KR]R:103-104,ARRR:[LIJVAP]X[KRTPEI]R:106-109,RR:[KR]R:107-108,KR:[KR]R:133-134,ARRR:[LIJVAP]X[KRTPEI]R:136-139,RR:[KR]R:137-138	RSWT:177-180	1	0	0	SignalP3NN:20,SignalP3HMM:20,SignalP4:20,SignalP5:20,DeepSig:20,Phobius:20,SignalP6:20	1	1
XPS69130.1	0.947	-2.158	1.835	.	.	.	.	0	0	0	PF07081	Domain:DUF1349	0	.	0	0.031	0.133	.	.	0.687	0.642	0.458	0.32	1	1	0	0	26478.8	239	-6	4.95	2	76	137	64	32	132	57	27	30	0.732	RR:[KR]R:163-164	HHYL:10-13,HKLS:72-75,RQYD:93-96,KWLK:115-118,KPYV:127-130,KSLW:171-174	0	1	0	SignalP3NN:25,SignalP3HMM:25,SignalP4:25,SignalP5:25,DeepSig:25,Phobius:25,SignalP6:25	1	1
XPS81419.1	0.939	4.053	3.182	.	.	.	.	0	0	0	PF01083	Domain:Cutinase	1	CE5	0	0.683	0.542	.	.	0.575	0.081	0.554	0.48	1	1	0	0	23484.9	227	1.5	7.188	4	92	137	83	18	141	37	20	17	0.687	ALER:[LIJVAP]X[KRTPEI]R:76-79,LERR:LXXR:77-80,RR:[KR]R:79-80,PAIR:[LIJVAP]X[KRTPEI]R:111-114	KFFV:2-5,RQFG:32-35,KAIL:51-54,RRYG:79-82,RLLN:118-121,KVFC:186-189,KFLI:219-222	0	1	0	SignalP3NN:16,SignalP3HMM:16,SignalP4:16,SignalP5:16,DeepSig:16,SignalP6:16,Phobius:18	1	1
XPS81420.1	0.939	5.659	3.278	MoCDIP4,ChNIS1,CoNIS1,MoNIS1	.	.	.	0	0	0	PF03443	Family:AA9	1	AA9	0	0.176	0.572	.	0.702	.	0.469	0.235	0.71	1	1	0	0	26247.8	248	4.5	8.118	4	94	151	73	29	154	41	24	17	0.635	RR:[KR]R:54-55,AGTR:[LIJVAP]X[KRTPEI]R:182-185	HGYL:21-24,KSIE:25-28,RRIK:54-57,HEIL:174-177,KPLP:205-208,RGYI:236-239	0	0	0	SignalP3NN:20,SignalP3HMM:20,SignalP4:20,SignalP5:20,DeepSig:20,Phobius:20,SignalP6:20	1	1
XPS81050.1	0.935	0.699	3.232	.	.	.	.	0	0	0	PF00135	Domain:COesterase	0	CE1	0	0	0.442	.	.	0.66	0.037	0.486	0.65	1	1	0	0	39073.8	364	5	8.123	4	135	210	109	44	205	60	34	26	0.956	LRFR:LXXR:59-62	KEYA:78-81,KKLP:114-117,KPIV:151-154,KSFG:198-201,HLFR:232-235	0	0	0	SignalP3NN:17,SignalP4:17,SignalP5:17,DeepSig:17,SignalP6:17,SignalP3HMM:19,Phobius:20	1	1
XPS69162.1	0.935	0.685	2.643	.	.	.	.	0	0	0	PF00497	Domain:SBP_bac_3	0	.	0	0.182	0.559	.	.	0.75	0.202	0.48	0.57	1	1	0	0	31398.1	290	1	7.082	4	98	165	104	27	170	54	28	26	1.136	LQVR:LXXR:225-228	RGYL:47-50,KPFS:59-62,KAFF:137-140,KQYM:259-262,RTLE:277-280,KWMS:281-284	0	0	0	SignalP3HMM:21,SignalP4:21,SignalP5:21,DeepSig:21,Phobius:21,SignalP6:21,SignalP3NN:23	1	1
XPS76647.1	0.935	3.301	2.89	.	.	.	.	0	0	0	PF09792	Domain:But2	0	.	0	0.36	0.557	.	0.636	.	0.24	0.194	0.63	1	1	0	0	20184.9	185	-1	6.065	2	55	106	53	22	107	31	16	15	0.933	LVNR:LXXR:19-22	HALA:2-5,RQFP:22-25,HLII:26-29,RDIG:158-161,HGIV:177-180	0	0	0	SignalP3HMM:17,SignalP4:17,SignalP5:17,Phobius:17,SignalP3NN:19,DeepSig:20	1	1
XPS77471.1	0.929	2.836	3.312	.	.	.	.	0	0	0	.	.	0	.	0	1	0.257	.	0.665	.	0.028	0.455	0.47	1	1	0	0	7781.18	76	0.5	7.006	0	22	53	38	1	50	11	6	5	0.696	INTR:[LIJVAP]X[KRTPEI]R:38-41	.	0	0	0	SignalP3NN:19,SignalP3HMM:19,SignalP4:19,SignalP5:19,DeepSig:19,Phobius:19,SignalP6:19	1	1
XPS70639.1	0.928	3.23	3.312	MoCDIP1	.	.	.	0	0	0	PF00544	Repeat:Pectate_lyase_4	0	PL1_4,PL1,PL1_7,PL1_5,PL1_10,PL1_2,PL1_9,PL1_6,PL1_11,PL1_8	0	0	0.13	.	0.519	.	0.545	0.302	0.88	1	1	0	0	40129.6	392	7.5	8.102	8	182	262	115	38	218	58	35	23	0.84	LVGR:LXXR:209-212	KTWL:63-66,RCIV:72-75,KEYN:78-81,KSIS:126-129,KSLI:146-149,KGLR:160-163,RQMF:212-215,HHYW:245-248,HAFD:295-298,KLFG:325-328	0	0	0	SignalP3NN:17,SignalP3HMM:17,SignalP4:17,SignalP5:17,DeepSig:17,Phobius:17,SignalP6:17	1	1
XPS72970.1	0.928	2.802	3.31	Mg3LysM,CfEcp6,MoSlp1,RsLysM,RiSLM,MgxLysM,Mg1LysM	.	.	.	0	0	0	PF01476	Domain:LysM	1	.	0	0	0.021	.	0.69	.	0.712	0.204	0.86	1	1	0	0	40227.3	373	-0.5	6.218	15	153	245	79	46	207	53	27	26	0.851	LVRR:[LIJVAP]X[KRTPEI]R&LXXR:23-26,RR:[KR]R:25-26	KQFT:160-163,KQFT:253-256,KTFY:323-326	0	0	0	SignalP3NN:19,SignalP3HMM:19,SignalP4:19,SignalP5:19,DeepSig:19,Phobius:19,SignalP6:26	1	1
XPS70230.1	0.924	-0.209	2.941	.	.	.	.	0	0	0	PF00264	Domain:Tyrosinase	0	.	0	0	0.391	.	.	0.809	0.089	0.221	0.46	1	1	0	0	42120.1	381	-2	6.221	9	127	216	103	52	207	82	43	39	0.954	KR:[KR]R:101-102,LWHR:LXXR:171-174,LETR:[LIJVAP]X[KRTPEI]R&LXXR:368-371	RPLS:46-49,HDLA:90-93,KCLM:131-134,KFLL:168-171,HRYF:173-176,RELP:192-195,HCLA:248-251,HAWG:288-291,HGFI:315-318,RNFR:320-323,HPLT:345-348	0	0	0	SignalP3NN:16,SignalP3HMM:16,SignalP4:16,SignalP5:16,SignalP6:16,Phobius:18,DeepSig:29	1	1
XPS71229.1	0.924	2.147	3.27	.	.	.	.	0	0	0	.	.	0	.	0	0	0.285	0.76	.	.	0.861	0.272	0.48	1	1	0	0	40061.9	381	14.5	9.555	8	144	231	108	26	211	101	59	42	0.844	KR:[KR]R:122-123,LLPR:[LIJVAP]X[KRTPEI]R&LXXR:188-191,LDTR:[LIJVAP]X[KRTPEI]R&LXXR:299-302,ATIR:[LIJVAP]X[KRTPEI]R:368-371	RMIS:33-36,KQFE:61-64,KPLA:128-131,RDLI:182-185,KLLP:187-190,RGMK:223-226,KALR:236-239,KSFA:285-288,KFLW:293-296,KKLD:297-300,RKWN:302-305,RDMD:371-374	1	0	0	SignalP3NN:19,SignalP3HMM:19,SignalP4:19,SignalP5:19,DeepSig:19,Phobius:19,SignalP6:19	1	1
XPS72489.1	0.924	0.341	3.199	.	.	.	.	0	0	0	PF00264	Domain:Tyrosinase	0	.	0	0	0.372	.	.	0.725	0.973	0.433	0.69	1	1	0	0	41915.3	384	5	7.253	8	131	221	113	54	224	77	44	33	0.928	RR:[KR]R:58-59,AKTR:[LIJVAP]X[KRTPEI]R:94-97,LEKR:[LIJVAP]X[KRTPEI]R&LXXR:328-331,KR:[KR]R:330-331	HFIK:2-5,REWS:59-62,HIIQ:105-108,HRYY:122-125,KGYQ:140-143,RCFV:188-191,KNWK:208-211,RCLS:238-241,RDIS:242-245,KSFQ:268-271,HGMV:313-316,RVWW:318-321,HVIA:333-336	0	0	0	SignalP3NN:19,SignalP3HMM:19,SignalP4:19,SignalP5:19,DeepSig:19,Phobius:19,SignalP6:19	1	1
XPS74707.1	0.924	1.224	2.976	MoCDIP10	.	.	.	0	0	0	PF13668	Domain:Ferritin_2	0	.	0	0.01	0.2	.	.	0.73	0.819	0.453	0.79	1	1	0	0	30235.3	293	-3.5	5.064	3	126	189	106	30	179	48	23	25	0.741	PTKR:[LIJVAP]X[KRTPEI]R:18-21,KR:[KR]R:20-21,AYIR:[LIJVAP]X[KRTPEI]R:154-157	KTIS:71-74,KTYL:136-139,KAFP:199-202,KDMP:209-212,KGFA:260-263	0	0	0	SignalP3NN:16,SignalP3HMM:16,SignalP4:16,SignalP5:16,DeepSig:16,Phobius:16,SignalP6:21	1	1
XPS78584.1	0.923	-1.076	2.559	.	.	.	.	0	0	0	PF04616	Family:Glyco_hydro_43	0	GH43_6,GH43_5,GH43_3,GH43,GH43_4,GH43_30,GH43_34,GH43_8,GH43_31,GH43_7,GH43_26,GH43_32,GH43_29,GH43_33,GH43_9,GH43_10,GH43_11,GH43_2,GH43_22,GH43_12,GH43_23,GH43_16,GH117,GH43_19,GH43_17,GH43_24	0	0	0.166	.	.	0.547	0.009	0.307	0.74	1	1	0	0	37987.3	347	-10	4.699	6	128	203	86	59	203	57	26	31	0.927	LLFR:LXXR:15-18,LEWR:LXXR:337-340	HQFT:186-189,RPLV:207-210	0	0	0	SignalP3NN:22,SignalP3HMM:22,SignalP4:22,SignalP5:22,DeepSig:22,Phobius:22,SignalP6:24	1	1
XPS69178.1	0.922	3.347	3.255	.	.	.	.	0	0	0	.	.	0	.	0	0.168	0.522	.	0.6	.	0.567	0.41	0.81	1	1	0	0	4885.49	45	-2.5	4.104	3	19	27	14	4	24	6	2	4	1	.	.	0	0	0	SignalP3NN:16,SignalP3HMM:16	1	1
XPS81559.1	0.922	-0.807	3.3	.	.	.	.	0	0	0	.	.	0	.	0	0.124	0.123	.	.	0.742	0.543	0.268	0.6	1	1	0	0	19286.3	187	10	11.12	0	74	117	62	12	109	28	20	8	0.5	.	KGIS:36-39,KTLP:55-58,KAFS:82-85,RVFT:177-180,RPIP:183-186	0	1	0	SignalP3NN:21,SignalP4:21,SignalP5:21,DeepSig:21,SignalP6:21,SignalP3HMM:23,Phobius:30	1	1
XPS74665.1	0.921	0.731	3.137	.	.	.	.	0	0	0	.	.	0	.	0	0.628	0.291	.	.	0.628	0.905	0.219	0.74	1	1	0	0	24837.6	248	-9	4.424	5	104	164	96	8	145	45	19	26	0.453	LRKR:[LIJVAP]X[KRTPEI]R&LXXR:22-25,KR:[KR]R:24-25,LIFR:LXXR:103-106,ALER:[LIJVAP]X[KRTPEI]R:107-110,LGLR:LXXR:205-208	HQIL:3-6,RALE:106-109,KQIA:151-154,RQIA:159-162	0	0	0	SignalP3NN:16,SignalP3HMM:16,SignalP4:16,SignalP5:16,DeepSig:16,Phobius:16,SignalP6:25	1	1
XPS81664.1	0.916	1.069	3.312	.	.	.	.	0	0	0	PF01083	Domain:Cutinase	1	CE5	0	0.074	0.064	.	.	0.616	0.017	0.287	0.78	1	1	0	0	23885.9	236	4	8.133	4	113	154	88	17	137	34	20	14	0.62	LSKR:[LIJVAP]X[KRTPEI]R&LXXR:44-47,KR:[KR]R:46-47,KR:[KR]R:183-184	HALS:42-45,RQYS:47-50,RAIS:64-67,RTIC:197-200	0	0	0	SignalP3NN:16,SignalP3HMM:16,SignalP4:16,SignalP5:16,DeepSig:16,Phobius:16,SignalP6:16	1	1
XPS77337.1	0.912	0.343	3.129	.	.	.	.	0	0	0	.	.	0	PL1_2,PL1	0	0	0.278	.	.	0.502	0.892	0.41	0.74	1	1	0	0	42350.9	402	-9	4.704	1	151	247	114	38	221	81	37	44	1.039	IKER:[LIJVAP]X[KRTPEI]R:72-75,VSKR:[LIJVAP]X[KRTPEI]R:78-81,KR:[KR]R:80-81,IRIR:[LIJVAP]X[KRTPEI]R:114-117,AFTR:[LIJVAP]X[KRTPEI]R:255-258,VDER:[LIJVAP]X[KRTPEI]R:333-336	HFLS:2-5,KVYV:36-39,RYIR:112-115,KNMI:135-138,RNLY:193-196,KGYV:264-267,KNFY:269-272,KILS:309-312,RLIT:336-339,KSYG:342-345	0	0	1	SignalP4:16,SignalP3NN:18,SignalP5:18,DeepSig:18,Phobius:18,SignalP6:18,SignalP3HMM:24	1	1
XPS72913.1	0.907	-2.1	3.162	.	.	.	.	0	0	0	PF17389	Repeat:Bac_rhamnosid6H	0	GH78	0	0	0.01	.	.	0.907	0.274	0.451	0.8	1	1	0	0	72868.8	668	-5	5.531	3	242	384	191	86	381	123	61	62	0.913	VRPR:[LIJVAP]X[KRTPEI]R:55-58,LTVR:LXXR:179-182,KR:[KR]R:261-262,LLYR:LXXR:388-391,LDPR:[LIJVAP]X[KRTPEI]R&LXXR:466-469	KDYI:121-124,RYLT:165-168,RAYQ:198-201,KIWY:213-216,RAIF:293-296,HLWA:321-324,HNYY:329-332,KILS:354-357,KGLV:362-365,RWIY:375-378,RALI:391-394,HLWD:430-433,RSLK:518-521,RGYR:557-560,HGWS:570-573,RKWE:595-598,KELE:605-608	0	1	0	SignalP3NN:19,SignalP3HMM:19,SignalP4:19,SignalP5:19,DeepSig:19,Phobius:19,SignalP6:19	1	1
XPS68037.1	0.907	-1.019	3.129	.	.	.	.	0	0	0	PF04389,PF02225	Family:Peptidase_M28,Family:PA	0	.	0	0	0.099	.	.	0.618	0.01	0.252	0.85	1	1	0	0	53732.1	509	-2	6.001	4	195	312	156	48	284	97	49	48	0.874	LRGR:LXXR:20-23,KR:[KR]R:34-35,LISR:LXXR:164-167,PPPR:[LIJVAP]X[KRTPEI]R:203-206,LKIR:[LIJVAP]X[KRTPEI]R&LXXR:335-338,LHAR:LXXR:458-461,KR:[KR]R:489-490,KR:[KR]R:503-504	RKLE:41-44,KKLL:50-53,RIMG:71-74,KELE:87-90,KALA:296-299,RAYL:338-341,HQIY:353-356,KYFT:380-383,KIWG:427-430,KILD:435-438,RGIA:461-464,RSLK:504-507	1	0	0	SignalP3NN:16,SignalP3HMM:16,SignalP4:16,SignalP5:16,DeepSig:16,Phobius:16,SignalP6:23	1	1
XPS76586.1	0.904	1.28	3.011	.	.	.	.	0	0	0	.	.	0	.	0	0.001	0.163	.	0.807	.	0.751	0.557	0.8	1	1	0	0	15734.5	150	-4.5	4.429	4	69	99	44	11	76	26	11	15	0.935	VIPR:[LIJVAP]X[KRTPEI]R:20-23,KR:[KR]R:125-126	.	0	0	0	SignalP3NN:18,SignalP3HMM:18,SignalP4:18,SignalP5:18,DeepSig:18,Phobius:18,SignalP6:23	1	1
XPS71786.1	0.902	2.006	2.55	Pslsc1,Vdlsc1	.	.	.	0	0	0	PF00857	Family:Isochorismatase	0	.	0	0.526	0.411	.	.	0.816	0.077	0.54	0.23	1	1	0	0	26906	249	-4	4.9	2	79	133	91	20	154	49	23	26	0.766	PWER:[LIJVAP]X[KRTPEI]R:24-27,PLIR:[LIJVAP]X[KRTPEI]R:100-103,LIRR:LXXR:101-104,RR:[KR]R:103-104,LSLR:LXXR:144-147	RDWD:49-52,KLFN:68-71,KEML:90-93,KQII:126-129,RDWR:194-197,RYLP:211-214	0	0	0	SignalP3NN:20,SignalP3HMM:20,SignalP4:20,SignalP5:20,DeepSig:20,Phobius:20,SignalP6:20	1	1
XPS78495.1	0.893	-1.25	3.294	.	.	.	.	0	0	0	PF00128,PF00686	Domain:Alpha-amylase,Family:CBM_20	0	GH13_1,GH13,GH13_2,GH13_20,GH13_41,GH13_36,GH13_14,GH13_12,GH13_21,GH13_39,GH13_32,GH13_6,GH13_28,GH13_13,GH13_7,GH13_19,GH13_10,CBM20,GH13_37,GH13_9,GH13_5,GH13_26,GH13_11,GH13_15,GH13_3,GH13_8,GH13_34,GH13_23	0	0	0.049	.	.	0.753	0.967	0.619	0.89	1	1	0	0	63705.1	593	3	6.987	8	234	366	182	73	327	92	50	42	1.036	LTDR:LXXR:35-38	RSIY:29-32,KGLE:63-66,KGLG:73-76,HGYW:94-97,KSLV:115-118,KGIY:124-127,RTLL:189-192,KEYS:201-204,KDFW:218-221,RWLS:304-307,RGIP:326-329,HLYV:386-389,HCFN:418-421,RAYT:575-578	0	0	0	SignalP3NN:20,SignalP3HMM:20,SignalP4:20,SignalP5:20,DeepSig:20,Phobius:20,SignalP6:20	1	1
XPS80485.1	0.889	2.467	3.146	.	.	.	.	0	0	0	.	.	0	.	0	0.015	0.41	.	0.688	.	0.062	0.629	0.64	1	1	0	0	26280.4	244	-3	4.994	2	95	148	68	26	129	44	21	23	0.925	KR:[KR]R:43-44,VQKR:[LIJVAP]X[KRTPEI]R:85-88,KR:[KR]R:87-88,PVKR:[LIJVAP]X[KRTPEI]R:234-237,KR:[KR]R:236-237	RFLG:100-103,KGFL:143-146,RSWQ:156-159,KSYG:213-216	0	0	0	SignalP3NN:18,SignalP3HMM:18,SignalP4:18,SignalP5:18,DeepSig:18,Phobius:18,SignalP6:18	1	1
XPS68993.1	0.888	3.659	3.1	.	.	.	.	0	0	0	.	.	0	.	0	0.918	0.456	.	0.917	.	0.013	0.472	0.69	1	1	0	0	11980.8	117	3	8.245	6	52	81	41	6	71	15	9	6	0.767	VDKR:[LIJVAP]X[KRTPEI]R:37-40,KR:[KR]R:39-40	KGFA:49-52,KSIN:57-60,RNLL:79-82	0	0	0	SignalP3NN:19,SignalP3HMM:19,SignalP4:19,SignalP5:19,DeepSig:19,Phobius:19,SignalP6:19	1	1
XPS72132.1	0.882	0.879	3.304	.	.	.	.	0	0	0	.	.	0	.	0	0.208	0.424	.	.	0.704	0.538	0.466	0.41	1	1	0	0	20105.8	189	3	7.73	4	74	111	51	21	111	31	18	13	0.642	LEIR:[LIJVAP]X[KRTPEI]R&LXXR:23-26,RR:[KR]R:91-92,LNGR:LXXR:160-163,PATR:[LIJVAP]X[KRTPEI]R:184-187	RWYR:88-91,RTWP:98-101,KFIH:130-133,RCLS:163-166,KPIS:179-182	0	0	0	SignalP3NN:20,SignalP3HMM:20,SignalP4:20,SignalP5:20,DeepSig:20,Phobius:20,SignalP6:20	1	1
XPS74753.1	0.88	1.134	3.25	.	.	.	.	0	0	0	.	.	0	.	0	0.247	0.091	.	0.549	.	0.036	0.527	0.84	1	1	0	0	16406.8	163	3	8.076	8	79	117	62	5	101	17	10	7	0.421	LLKR:[LIJVAP]X[KRTPEI]R&LXXR:50-53,KR:[KR]R:52-53,ALIR:[LIJVAP]X[KRTPEI]R:148-151	KAML:154-157	0	0	0	SignalP4:16,SignalP3NN:22,SignalP3HMM:22,SignalP5:22,DeepSig:22,Phobius:22,SignalP6:22	1	1
XPS70382.1	0.879	3.272	2.582	.	.	.	.	0	0	0	.	.	0	.	0	0.522	0.558	0.764	.	.	0.481	0.321	0.11	1	1	0	0	22129	202	-5.5	4.677	2	61	111	62	16	107	51	23	28	1.114	KR:[KR]R:105-106,KR:[KR]R:141-142	KPLV:2-5,RPFD:22-25,KSFN:29-32,RDYI:41-44,RDID:75-78,KNLK:102-105,KPWE:107-110,RHIV:142-145,KTLA:157-160,KTIQ:173-176	1	0	0	SignalP6:16,SignalP3NN:19,SignalP4:19,Phobius:19,SignalP3HMM:21,SignalP5:21,DeepSig:21	1	1
XPS70403.1	0.879	-1.782	2.897	.	.	.	.	0	0	0	PF03403	Domain:PAF-AH_p_II	0	.	0	0	0.131	.	.	0.954	0.757	0.425	0.07	1	1	0	0	41342.9	384	-4.5	5.616	3	132	216	120	39	213	84	42	42	0.841	LTTR:[LIJVAP]X[KRTPEI]R&LXXR:190-193,PSIR:[LIJVAP]X[KRTPEI]R:248-251,KR:[KR]R:301-302	HKFD:30-33,KVMV:58-61,KHLE:73-76,KPLP:123-126,RLIY:138-141,HPYD:160-163,KGLE:176-179,RQLG:202-205,HSIG:233-236,RPFM:272-275,REFE:302-305,RVMN:345-348,HVLK:360-363,KNFP:374-377	0	1	0	SignalP3NN:21,SignalP3HMM:21,Phobius:21,SignalP4:22,SignalP5:22,DeepSig:22,SignalP6:22	1	1
XPS80645.1	0.879	-3.642	-1.295	.	.	.	.	0	0	0	PF00294	Domain:PfkB	0	.	0	0.236	0.41	.	.	0.678	0.813	0.642	0.22	0	0	0	0	34345	325	-4.5	5.228	2	114	192	115	23	183	76	37	39	0.805	LVTR:[LIJVAP]X[KRTPEI]R&LXXR:17-20	KSLQ:88-91,KILK:101-104,RIMF:123-126,RDLV:137-140,HNMK:160-163,HLIV:192-195,KSIS:282-285	0	0	0	.	0	0
XPS81288.1	0.879	0.22	2.545	.	.	.	.	0	0	0	.	.	0	.	0	0	0.052	0.674	.	.	0.892	0.661	0.45	1	1	0	0	40721.8	426	-4.5	5.233	0	221	284	130	5	243	120	58	62	0.338	PVRR:[LIJVAP]X[KRTPEI]R:39-42,RR:[KR]R:41-42	KTFH:33-36,RQLE:42-45	1	0	0	SignalP3NN:19,SignalP3HMM:19,SignalP4:19,SignalP5:19,DeepSig:19,Phobius:19,SignalP6:19	1	1
XPS74484.1	0.873	0.482	3.261	CfTom1	.	.	.	0	0	0	PF11790	Family:Glyco_hydro_cc	0	GH128,GH5,GH173	0	0	0.012	.	.	0.733	0.463	0.416	0.82	1	1	0	0	48561.7	473	-2.5	6.038	4	226	318	138	50	258	74	38	36	0.679	KR:[KR]R:238-239	KPYP:38-41,KTIY:77-80,KVYS:207-210,RGLA:239-242,KEYM:328-331,HFYD:379-382,HGYA:442-445	0	0	0	SignalP3NN:18,SignalP4:18,DeepSig:18,SignalP3HMM:23,SignalP5:23,Phobius:23,SignalP6:23	1	1
XPS69229.1	0.873	-1.347	3.268	.	.	.	.	0	0	0	PF00135	Domain:COesterase	0	.	0	0	0.074	.	.	0.809	0.686	0.316	0.92	1	1	0	0	73802.4	692	5	7.748	10	260	421	197	79	385	112	60	52	1.096	LSTR:[LIJVAP]X[KRTPEI]R&LXXR:445-448,LQVR:LXXR:628-631	KPLS:78-81,KGFY:109-112,KQLI:122-125,KNLP:135-138,KSFR:176-179,KQIT:326-329,RTLL:341-344,RVIA:497-500,KTFR:527-530,KAFQ:544-547,KAYY:548-551,RTIG:556-559,RGYD:631-634,KVIE:635-638,KNYG:641-644,RHLD:660-663	0	0	0	SignalP6:19,SignalP3NN:20,SignalP3HMM:20,SignalP4:20,SignalP5:25,DeepSig:25,Phobius:25	1	1
XPS74708.1	0.867	-2.692	1.9	.	.	.	.	0	0	0	.	.	0	.	0	0	0.049	.	.	0.698	0.041	0.525	0.89	1	1	0	0	28136.9	315	8.5	9.241	6	214	270	59	12	175	16	13	3	0.302	.	KSFS:2-5,RNIA:297-300	0	1	0	SignalP3NN:18,SignalP3HMM:18,SignalP4:18,SignalP5:18,DeepSig:18,Phobius:18,SignalP6:18	1	1
XPS74082.1	0.867	1.537	3.003	.	.	.	.	0	0	0	.	.	0	.	0	0.471	0.553	.	.	0.644	0.043	0.405	0.55	1	1	0	0	18798.2	179	-3.5	4.85	1	73	107	59	20	107	30	14	16	0.741	.	RSLT:5-8,KLFH:39-42,KGFG:116-119	0	0	0	SignalP3NN:21,SignalP3HMM:21,SignalP4:21,SignalP5:21,DeepSig:21,Phobius:21,SignalP6:21	1	1
XPS68645.1	0.863	2.938	2.384	.	.	.	.	0	0	0	.	.	0	.	0	0.998	0.774	.	.	0.511	0.321	0.273	0.62	1	1	0	0	10016.3	95	-5	4.65	5	38	55	27	9	53	20	9	11	0.304	.	RHLH:26-29,HALV:51-54,HSFH:66-69	0	0	0	SignalP3NN:17,SignalP3HMM:17,Phobius:17	1	1
XPS70093.1	0.862	0.707	3.081	.	.	.	.	0	0	0	PF00264	Domain:Tyrosinase	0	.	0	0.005	0.531	.	.	0.776	0.028	0.534	0.38	1	1	0	0	38034.7	341	-0.5	6.42	7	102	183	87	49	185	75	40	35	1.181	PPKR:[LIJVAP]X[KRTPEI]R:34-37,KR:[KR]R:36-37,LEWR:LXXR:38-41,LWHR:LXXR:96-99,RR:[KR]R:198-199,LKQR:LXXR:288-291	KRLE:36-39,RQLS:41-44,KSYI:49-52,HAIN:69-72,HFIL:93-96,HRYF:98-101,KALR:107-110,KIFE:137-140,RDFN:199-202,RIMN:204-207,KDYT:222-225,RAIE:229-232,RIFW:278-281,KDLK:286-289,RELL:327-330,KTLC:335-338	0	0	0	SignalP3NN:19,SignalP4:19,Phobius:19,SignalP5:20,SignalP3HMM:21,DeepSig:21,SignalP6:21	1	1
XPS75092.1	0.86	5.07	3.23	.	.	.	.	0	0	0	.	.	0	.	0	0.999	0.696	.	0.658	.	0.661	0.365	0.44	1	1	0	0	8790.17	80	0	6.452	6	28	45	24	11	48	14	8	6	0.933	LENR:LXXR:64-67	RTLL:50-53,RKIH:67-70	0	0	0	SignalP3NN:17,SignalP3HMM:17,SignalP4:17,Phobius:17	1	1
XPS77212.1	0.859	-1.009	3.264	.	.	.	.	0	0	0	PF05390,PF10342	Domain:Kre9_KNH1_C,Domain:Kre9_KNH	0	.	0	0.002	0.079	.	.	0.634	0.074	0.416	0.78	1	1	0	0	27259.7	264	-4.5	4.662	0	113	172	79	20	152	42	19	23	0.561	.	RLLL:3-6,KVLT:76-79,KGLD:145-148,KPLY:206-209,KFLN:257-260	0	0	0	SignalP3NN:20,SignalP3HMM:20,SignalP4:20,SignalP5:20,DeepSig:20,Phobius:20,SignalP6:20	1	1
XPS77657.1	0.858	0.074	2.093	MoCDIP2,MoCDIP11,BghBEC4	.	.	.	0	0	0	.	.	0	.	0	0.002	0.074	.	.	0.517	0.005	0.414	0.89	1	1	0	0	16215.1	162	-2	4.593	8	88	122	63	8	92	18	8	10	0.469	.	.	0	0	0	SignalP3NN:19,SignalP3HMM:19,SignalP4:19,SignalP5:19,DeepSig:19,Phobius:19,SignalP6:19	1	1
XPS73274.1	0.858	2.976	3.31	PsGIP2,PsGIP1	.	.	.	0	0	0	PF00089	Domain:Trypsin	0	.	0	0	0.059	.	0.767	.	0.44	0.265	0.83	1	1	0	0	25191.3	252	6	8.509	6	128	181	84	15	143	28	18	10	0.5	LNSR:LXXR:57-60,LTVR:LXXR:77-80	KALI:4-7,RTLV:216-219	0	1	0	SignalP3NN:17,SignalP3HMM:17,SignalP4:17,SignalP5:17,DeepSig:17,Phobius:17,SignalP6:17	1	1
XPS73302.1	0.852	1.585	2.615	.	.	.	.	0	0	0	.	.	0	.	0	0.691	0.533	.	.	0.55	0.443	0.434	0.28	1	1	0	0	27316.8	255	-4.5	4.825	4	84	146	78	16	140	56	26	30	0.828	PARR:[LIJVAP]X[KRTPEI]R:20-23,RR:[KR]R:22-23,KR:[KR]R:54-55,KR:[KR]R:210-211	RQIS:23-26,RQFK:51-54,RDIT:99-102,RNIG:158-161	0	0	0	SignalP3NN:18,SignalP3HMM:18,SignalP4:18,SignalP5:18,DeepSig:18,Phobius:18,SignalP6:23	1	1
XPS80369.1	0.85	1.462	3.312	.	.	.	.	0	0	0	.	.	0	.	0	0.009	0.175	.	0.615	.	0.295	0.447	0.85	1	1	0	0	24025.4	248	0	6.254	0	109	199	55	6	121	20	10	10	1.13	LKDR:LXXR:89-92	RALG:92-95,RDLA:160-163,KFLG:186-189	0	0	0	SignalP3NN:20,SignalP3HMM:20,SignalP4:20,SignalP5:20,DeepSig:20,Phobius:20,SignalP6:20	1	1
XPS75492.1	0.846	3.508	3.073	.	.	.	.	0	0	0	PF13577	Domain:SnoaL_4	0	.	0	0.455	0.535	.	0.602	.	0.52	0.48	0.27	1	1	0	0	21358.4	196	-1.5	5.612	2	67	108	68	23	118	30	15	15	0.936	.	RIFD:70-73,KAIE:98-101,HILG:116-119,HFLP:141-144,RNLV:183-186	0	0	0	SignalP3NN:16,SignalP4:16,SignalP5:16,DeepSig:16,Phobius:16,SignalP6:16,SignalP3HMM:19	1	1
XPS69871.1	0.841	-0.46	2.807	.	.	.	.	0	0	0	.	.	0	.	0	0	0.221	.	.	0.538	0.368	0.398	0.23	1	1	0	0	39701	360	3	7.02	3	112	199	102	37	193	94	51	43	0.779	PATR:[LIJVAP]X[KRTPEI]R:24-27,LSKR:[LIJVAP]X[KRTPEI]R&LXXR:55-58,KR:[KR]R:57-58,RR:[KR]R:218-219,LGNR:LXXR:325-328,RR:[KR]R:328-329	RTFL:8-11,RYMH:27-30,KRWD:57-60,REFQ:67-70,RALA:98-101,KDMY:133-136,KGIS:145-148,KDWK:152-155,KTIN:167-170,KQYS:207-210,KPYH:242-245,RLIA:266-269,KALK:285-288,RKIE:331-334	0	0	0	SignalP3HMM:22,SignalP4:22,SignalP5:22,Phobius:22,SignalP3NN:25,DeepSig:25,SignalP6:27	1	1
XPS72537.1	0.84	2.302	1.955	.	.	.	.	0	0	0	PF17615	Family:C166	0	.	0	0.955	0.426	0.609	.	.	0.29	0.195	0.37	1	1	0	0	19515.7	186	-1.5	5.063	1	64	105	79	11	116	25	12	13	0.9	VAIR:[LIJVAP]X[KRTPEI]R:2-5	RNLF:5-8,RDFV:104-107,RQLE:139-142,KGIS:182-185	0	0	0	SignalP3HMM:20,Phobius:20,SignalP3NN:21,SignalP4:21,SignalP5:21,DeepSig:21,SignalP6:21	1	1
XPS75610.1	0.838	-0.752	3.254	.	.	.	.	0	0	0	PF00026	Family:Asp	0	.	0	0	0.049	.	.	0.532	0.895	0.507	0.83	1	1	0	0	42494.3	407	2	7.048	2	175	265	129	47	224	65	35	30	0.892	VQKR:[LIJVAP]X[KRTPEI]R:22-25,KR:[KR]R:24-25	HKLQ:35-38,KALR:48-51,HDYY:130-133,RVYA:159-162,KTFF:213-216,KQLF:225-228,RAYY:304-307,KFIN:347-350	0	0	0	Phobius:18,SignalP3NN:19,SignalP3HMM:19,SignalP4:19,SignalP5:19,DeepSig:19,SignalP6:25	1	1
XPS72379.1	0.835	-0.099	2.791	.	.	.	.	0	0	0	.	.	0	.	0	0.059	0.361	.	.	0.672	0.134	0.216	0.5	1	1	0	0	33394.1	319	3	7.202	0	118	198	116	26	183	59	33	26	0.844	LDSR:LXXR:145-148,LDIR:[LIJVAP]X[KRTPEI]R&LXXR:163-166	RTIH:26-29,KNMF:90-93,RTLL:148-151,RPMS:254-257	0	0	0	SignalP3NN:22,SignalP3HMM:22,SignalP4:22,SignalP5:22,DeepSig:22,Phobius:22,SignalP6:22	1	1
XPS73661.1	0.831	-1.889	3.118	.	.	.	.	0	0	0	PF00149	Domain:Metallophos	0	.	0	0	0.01	.	.	0.784	0.017	0.479	0.12	1	1	0	0	69276.7	619	-11.5	5.465	4	182	317	169	90	323	171	85	86	1.23	LAPR:[LIJVAP]X[KRTPEI]R&LXXR:167-170,VVTR:[LIJVAP]X[KRTPEI]R:200-203,VDIR:[LIJVAP]X[KRTPEI]R:231-234,RR:[KR]R:314-315,ISRR:[LIJVAP]X[KRTPEI]R:369-372,RR:[KR]R:371-372	RELP:31-34,HGWW:47-50,KHMR:71-74,HELY:126-129,RDFQ:143-146,KKFA:172-175,RILA:182-185,KNLD:220-223,KDLP:250-253,RDYK:264-267,RYME:280-283,RRYI:314-317,KAFP:333-336,HGLN:339-342,RAIG:345-348,KKYG:358-361,RDLW:365-368,RPYP:372-375,KALV:404-407,KFLV:428-431,RLIK:439-442,KLLN:454-457,HEYT:583-586,KSFT:597-600	0	0	0	SignalP3NN:17,SignalP3HMM:17,SignalP5:17,Phobius:17,SignalP6:17,SignalP4:18,DeepSig:18	1	1
XPS70992.1	0.827	1.641	3.308	.	.	.	.	0	0	0	.	.	0	.	0	0.002	0.19	0.665	.	.	0.746	0.414	0.18	1	1	0	0	36975.4	343	20.5	10.205	7	109	205	94	23	182	90	56	34	0.733	LEAR:LXXR:133-136,ADKR:[LIJVAP]X[KRTPEI]R:245-248,KR:[KR]R:247-248,LSNR:LXXR:252-255,VEKR:[LIJVAP]X[KRTPEI]R:265-268,KR:[KR]R:267-268,LVFR:LXXR:310-313,VVTR:[LIJVAP]X[KRTPEI]R:337-340	KALQ:41-44,KPIA:196-199,KKLY:229-232,KALN:282-285,KEMP:290-293,HVLE:331-334,RFFD:340-343	1	0	0	SignalP3NN:20,SignalP3HMM:20,SignalP4:20,SignalP5:20,DeepSig:20,Phobius:20,SignalP6:20	1	1
XPS70682.1	0.817	-3.106	1.64	.	.	.	.	0	0	0	.	.	0	.	0	0	0.017	.	.	0.701	0.107	0.407	0.89	1	1	0	0	16661.4	177	-1	4.853	8	111	136	63	5	104	15	7	8	0.299	.	KKYS:85-88	0	0	0	SignalP3NN:16,SignalP4:16,SignalP6:16,SignalP3HMM:22,SignalP5:22,DeepSig:22,Phobius:28	1	1
XPS71797.1	0.816	-1.608	1.106	.	.	.	.	0	0	0	PF04389	Family:Peptidase_M28	0	.	0	0	0.015	0.59	.	.	0.077	0.426	0.1	1	1	0	0	43982.8	391	-11	5.196	1	110	197	111	53	208	121	59	62	0.867	LRPR:[LIJVAP]X[KRTPEI]R&LXXR:51-54,IATR:[LIJVAP]X[KRTPEI]R:104-107,AGPR:[LIJVAP]X[KRTPEI]R:238-241,KR:[KR]R:281-282,PFPR:[LIJVAP]X[KRTPEI]R:330-333,AERR:[LIJVAP]X[KRTPEI]R:375-378,RR:[KR]R:377-378	HDLS:22-25,KGLP:30-33,HFID:67-70,KGFI:133-136,RTLD:153-156,KKWA:161-164,RSWT:190-193,RALA:202-205,KHMA:254-257,RKLK:264-267,HFLY:292-295,HIIP:325-328,RVWH:333-336	1	0	0	SignalP3NN:20,SignalP3HMM:20,SignalP4:20,SignalP5:20,DeepSig:20,Phobius:20,SignalP6:20	1	1
XPS77026.1	0.809	0.792	2.979	.	.	.	.	0	0	0	.	.	0	.	0	0.037	0.458	.	.	0.641	0.941	0.657	0.63	1	1	0	0	33971.2	309	-5	4.975	0	92	172	95	36	172	63	30	33	1.279	KR:[KR]R:28-29,LYRR:[LIJVAP]X[KRTPEI]R&LXXR:135-138,RR:[KR]R:137-138,LFGR:LXXR:208-211,RR:[KR]R:211-212,KR:[KR]R:262-263,LAGR:LXXR:297-300	KRLI:28-31,RRIL:137-140,HSIT:146-149,KKIA:181-184,RRLT:211-214,RGLD:251-254,RSID:286-289	0	0	0	SignalP3NN:21,SignalP3HMM:21,SignalP4:21,SignalP5:21,DeepSig:21,Phobius:21,SignalP6:21	1	1
XPS71174.1	0.807	0.49	3.299	.	.	.	.	0	0	0	PF00264	Domain:Tyrosinase	0	.	0	0	0.392	.	.	0.745	0.967	0.387	0.61	1	1	0	0	41457.6	379	1.5	6.713	6	129	211	101	49	204	79	43	36	1.024	KR:[KR]R:233-234,LQGR:LXXR:269-272	KKID:38-41,KDWD:57-60,KAYT:68-71,HRLF:120-123,KALR:129-132,KGMT:202-205,RCLK:230-233,RDLT:234-237,KLFQ:263-266,HAML:308-311,RVYW:313-316,KPLC:372-375	0	0	0	SignalP3NN:20,SignalP3HMM:20,SignalP4:20,SignalP5:20,DeepSig:20,Phobius:20,SignalP6:20	1	1
XPS79682.1	0.806	2.851	3.034	CfEcp6,Mg3LysM,MoSlp1,RsLysM,Mg1LysM,MgxLysM,RiSLM	.	.	.	0	0	0	PF01476	Domain:LysM	1	CBM50	0	0.005	0.06	.	0.846	.	0.946	0.464	0.89	1	1	0	0	22348.1	216	-6	4.348	8	95	146	69	13	114	29	12	17	1.111	IFRR:[LIJVAP]X[KRTPEI]R:20-23,RR:[KR]R:22-23	HLIA:4-7,KAIT:136-139,HSIG:161-164	0	0	0	SignalP3NN:18,SignalP3HMM:18,SignalP4:18,SignalP5:18,DeepSig:18,Phobius:18,SignalP6:23	1	1
XPS79016.1	0.806	0.794	3.265	MoAVR_Pita,MoAVR_Pita2,BghBEC1019	.	.	.	0	0	0	PF02102	Family:Peptidase_M35	0	.	0	0	0.093	.	.	0.742	0.095	0.436	0.86	1	1	0	0	36839.2	354	-2	5.713	8	162	230	120	27	182	60	30	30	0.866	VNKR:[LIJVAP]X[KRTPEI]R:23-26,KR:[KR]R:25-26,VQKR:[LIJVAP]X[KRTPEI]R:176-179,KR:[KR]R:178-179	KTFA:2-5,KALN:52-55,RLLT:91-94,HSLN:121-124,KAID:172-175	0	0	0	SignalP3NN:18,SignalP3HMM:18,SignalP4:18,SignalP5:18,DeepSig:18,Phobius:18,SignalP6:18	1	1
XPS75403.1	0.805	0.859	3.308	Cgfl,FoMep1	.	.	.	0	0	0	PF02128,PF07504	Family:Peptidase_M36,Motif:FTP	1	.	0	0	0.102	.	.	0.745	0.016	0.258	0.84	1	1	0	0	67738.3	629	-10	5.114	5	233	390	177	73	341	124	60	64	0.948	LVAR:LXXR:26-29,LRKR:[LIJVAP]X[KRTPEI]R&LXXR:57-60,KR:[KR]R:59-60,LTKR:[LIJVAP]X[KRTPEI]R&LXXR:139-142,KR:[KR]R:141-142,LTWR:LXXR:206-209,LSTR:[LIJVAP]X[KRTPEI]R&LXXR:430-433,ADTR:[LIJVAP]X[KRTPEI]R:469-472,VGIR:[LIJVAP]X[KRTPEI]R:487-490,KR:[KR]R:605-606	KSIV:72-75,HDID:103-106,RDFS:142-145,KLMY:193-196,RALI:258-261,HDLL:345-348,RMFL:402-405,HEYT:424-427,HGLS:428-431,KNYP:474-477,RSYL:490-493,HAIG:515-518,KYLT:556-559,KAFA:601-604,RGLG:606-609	0	0	0	SignalP3NN:17,SignalP3HMM:17,SignalP4:17,SignalP5:17,DeepSig:17,Phobius:17,SignalP6:17	1	1
XPS69223.1	0.804	1.139	3.254	.	.	.	.	0	0	0	PF01263	Family:Aldose_epim	0	.	0	0	0.131	.	0.558	.	0.252	0.325	0.81	1	1	0	0	43342.1	395	-12.5	4.57	5	129	234	98	53	215	79	35	44	1.239	LDSR:LXXR:339-342,RR:[KR]R:342-343,KR:[KR]R:372-373	RGLF:44-47,RNFT:134-137,HTYW:196-199,HTLY:215-218,KQIG:254-257,RQIF:373-376	0	0	0	SignalP3NN:16,SignalP3HMM:16,SignalP4:16,SignalP5:16,DeepSig:16,Phobius:16,SignalP6:16	1	1
XPS73696.1	0.804	0.287	3.308	MoCDIP1	.	.	.	0	0	0	PF12708	Repeat:Pectate_lyase_3	0	GH55	0	0	0.067	.	.	0.953	0.634	0.28	0.81	1	1	0	0	84907	790	0	6.5	9	287	472	226	93	455	128	67	61	0.926	LQAR:LXXR:43-46,LFMR:LXXR:182-185,VKIR:[LIJVAP]X[KRTPEI]R:219-222,AWTR:[LIJVAP]X[KRTPEI]R:332-335,VHTR:[LIJVAP]X[KRTPEI]R:552-555,RR:[KR]R:732-733	KGIA:60-63,KVFR:73-76,RAIS:97-100,KPII:131-134,RNLP:146-149,RQIR:185-188,KYYS:410-413,KVLF:459-462,KLIE:535-538,HDLD:606-609,RGLL:622-625,HGLY:641-644,RRIC:732-735,RILS:738-741,RDYA:767-770	0	0	0	SignalP3NN:17,SignalP3HMM:17,SignalP4:17,SignalP5:17,DeepSig:17,Phobius:17,SignalP6:17	1	1
XPS79078.1	0.804	-0.915	3.308	.	.	.	.	0	0	0	PF16499,PF17801	Family:Melibiase_2,Domain:Melibiase_C	0	GH27,CBM35	0	0	0.078	.	.	0.642	0.462	0.285	0.91	1	1	0	0	58473.7	552	6	8.335	7	215	343	171	48	303	94	51	43	0.94	LADR:LXXR:52-55,LKQR:LXXR:325-328,RR:[KR]R:356-357,LALR:LXXR:398-401,KR:[KR]R:406-407	KAIN:47-50,RGFI:55-58,KPLS:97-100,KGMK:106-109,KSLN:144-147,KELQ:184-187,KDWT:213-216,KGIS:217-220,RIYN:238-241,KVLQ:304-307,KDLL:309-312,KPIT:321-324,RDLW:333-336,RTLT:357-360,KDLW:374-377,KGYA:515-518	0	0	0	SignalP3NN:19,SignalP3HMM:19,SignalP4:19,SignalP5:19,DeepSig:19,SignalP6:19,Phobius:29	1	1
XPS76944.1	0.804	-1.464	2.824	.	.	.	.	0	0	0	PF04389,PF02225	Family:Peptidase_M28,Family:PA	0	.	0	0	0.104	.	.	0.695	0.144	0.245	0.86	1	1	0	0	52415	493	-5.5	5.311	6	178	293	153	42	270	100	49	51	1.017	LFNR:LXXR:93-96,LVQR:LXXR:155-158,LAGR:LXXR:167-170,LVAR:LXXR:219-222,VETR:[LIJVAP]X[KRTPEI]R:239-242,ISTR:[LIJVAP]X[KRTPEI]R:464-467	KELV:24-27,KKLQ:30-33,KKLM:39-42,RAFG:59-62,KNFR:81-84,HVIG:110-113,RALE:290-293,RIIW:302-305,KYYT:317-320,RGYF:342-345,KLFV:368-371,KGIN:377-380,HVLS:441-444,HEII:451-454,RGLT:467-470,RHLL:484-487	0	0	0	SignalP3NN:17,SignalP3HMM:17,SignalP4:17,SignalP5:17,DeepSig:17,Phobius:17,SignalP6:17	1	1
XPS73474.1	0.804	0.365	3.31	MoCDIP10	.	.	.	0	0	0	PF13668	Domain:Ferritin_2	0	.	0	0	0.009	.	.	0.833	0.966	0.468	0.81	1	1	0	0	53201	496	-22	4.148	4	185	306	132	58	287	71	26	45	0.69	AYPR:[LIJVAP]X[KRTPEI]R:63-66,LDSR:LXXR:251-254	KAIF:4-7,RYMV:140-143,RAYI:188-191,REFI:227-230,RQML:275-278,HPMP:281-284	0	0	0	SignalP3NN:18,SignalP3HMM:18,SignalP4:18,SignalP5:18,DeepSig:18,Phobius:18,SignalP6:18	1	1
XPS70252.1	0.802	2.177	3.218	.	.	.	.	0	0	0	.	.	0	.	0	0.002	0.3	0.737	.	.	0.939	0.266	0.59	1	1	0	0	34192	320	19.5	10.019	8	126	189	82	26	164	79	50	29	0.964	LEAR:LXXR:124-127,LKAR:LXXR:171-174,LTGR:LXXR:202-205,LIQR:LXXR:211-214,KR:[KR]R:219-220,ILER:[LIJVAP]X[KRTPEI]R:293-296	KAFS:32-35,RKWI:50-53,HGIY:108-111,KTLT:200-203,RALL:205-208,KTLN:282-285,KGLD:286-289,HILE:292-295	1	0	0	SignalP3NN:19,SignalP3HMM:19,SignalP4:19,SignalP5:19,DeepSig:19,Phobius:19,SignalP6:19	1	1
XPS77097.1	0.8	-0.589	2.92	.	.	.	.	0	0	0	PF04389,PF02225	Family:Peptidase_M28,Family:PA	0	.	0	0	0.237	.	.	0.712	0.926	0.584	0.57	1	1	0	0	53462.9	505	0	6.504	5	185	293	157	57	293	115	60	55	0.965	LISR:LXXR:150-153,AKIR:[LIJVAP]X[KRTPEI]R:323-326,LRKR:[LIJVAP]X[KRTPEI]R&LXXR:472-475,KR:[KR]R:474-475	KDLI:29-32,KNLI:38-41,RAFG:58-61,KKYG:77-80,HYLK:306-309,RAYL:326-329,KNFE:364-367,KFYE:368-371,RLFG:415-418,KALD:423-426	0	0	0	SignalP3NN:18,SignalP3HMM:18,SignalP4:18,SignalP5:18,DeepSig:18,Phobius:18,SignalP6:18	1	1
XPS78779.1	0.798	2.291	3	.	.	.	.	0	0	0	.	.	0	.	0	0.877	0.2	0.727	.	.	0.749	0.387	0.37	1	1	0	0	21612.6	214	-3	4.901	0	81	131	82	4	131	45	21	24	0.425	AAKR:[LIJVAP]X[KRTPEI]R:93-96,KR:[KR]R:95-96,RR:[KR]R:101-102,LGKR:[LIJVAP]X[KRTPEI]R&LXXR:108-111,KR:[KR]R:110-111,KR:[KR]R:131-132,KR:[KR]R:190-191	RSIK:96-99,RDLQ:132-135	1	0	0	SignalP3NN:18,SignalP3HMM:18,SignalP4:18,SignalP5:18,DeepSig:18,Phobius:18,SignalP6:18	1	1
XPS78389.1	0.798	1.321	2.922	.	.	.	.	0	0	0	.	.	0	.	0	0	0.175	0.861	.	.	0.965	0.604	0.2	1	1	0	0	37249.1	340	25	10.355	0	104	176	91	32	146	158	97	61	0.696	KR:[KR]R:77-78,KR:[KR]R:103-104,VTKR:[LIJVAP]X[KRTPEI]R:117-120,KR:[KR]R:119-120,KR:[KR]R:143-144,LHTR:[LIJVAP]X[KRTPEI]R&LXXR:166-169,KR:[KR]R:192-193,LHTR:[LIJVAP]X[KRTPEI]R&LXXR:215-218,KR:[KR]R:241-242,LHTR:[LIJVAP]X[KRTPEI]R&LXXR:264-267,KR:[KR]R:294-295,LHTR:[LIJVAP]X[KRTPEI]R&LXXR:319-322	.	1	0	0	SignalP3NN:17,SignalP3HMM:17,SignalP4:17,SignalP5:17,DeepSig:17,Phobius:17,SignalP6:17	1	1
XPS74628.1	0.796	4.578	3.31	RiNLE1	.	.	.	0	0	0	.	.	0	.	0	0.269	0.307	0.533	0.557	.	0.097	0.552	0.6	1	1	0	0	39722.5	383	-5.5	4.629	4	138	234	77	24	192	40	18	22	0.667	LQVR:LXXR:135-138	KTLT:129-132,KGIN:239-242,RDFV:379-382	0	0	0	SignalP3NN:18,SignalP3HMM:18,SignalP4:18,SignalP5:18,DeepSig:18,Phobius:18,SignalP6:18	1	1
XPS72266.1	0.795	2.983	2.98	.	.	.	.	0	0	0	.	.	0	.	0	0.176	0.503	.	0.561	.	0.66	0.509	0.69	1	1	0	0	21077.9	195	-2	4.982	6	74	116	52	15	104	36	17	19	1	.	RQIP:21-24,RGYA:69-72,RGIG:117-120,RVFD:143-146,KTLK:149-152	0	0	0	SignalP4:14,SignalP5:14,DeepSig:14,Phobius:14,SignalP3NN:17,SignalP3HMM:20,SignalP6:21	1	1
XPS78180.1	0.795	0.886	3.231	.	.	.	.	0	0	0	PF09362	Domain:DUF1996	0	.	0	0.003	0.503	.	.	0.706	0.007	0.479	0.73	1	1	0	0	35334.7	327	0	6.48	8	126	196	84	39	177	61	32	29	0.877	KR:[KR]R:309-310	HSFF:50-53,KSMP:207-210,KVLP:222-225,KQMS:305-308	0	0	0	SignalP3NN:20,SignalP3HMM:20,SignalP4:20,SignalP5:20,DeepSig:20,Phobius:20,SignalP6:20	1	1
XPS71825.1	0.794	-1.985	3.291	.	.	.	.	0	0	0	PF16010,PF00732,PF05199	Family:CDH-cyt,Domain:GMC_oxred_N,Domain:GMC_oxred_C	0	AA3_1,AA3,AA3_2,AA8,AA3_3	0	0	0.01	.	.	0.906	0.194	0.664	0.93	1	1	0	0	86955.9	834	-21.5	4.598	4	351	543	250	76	459	139	62	77	0.715	AAER:[LIJVAP]X[KRTPEI]R:260-263,LIER:[LIJVAP]X[KRTPEI]R&LXXR:273-276,LYSR:LXXR:366-369,KR:[KR]R:412-413,KR:[KR]R:457-458	HLLL:87-90,HDFE:345-348,RLYS:365-368,KHYD:381-384,KRMV:412-415,RTYM:433-436,KVIQ:452-455,RILW:497-500,HGLK:535-538,HLWT:588-591,RYLQ:601-604,KTFL:618-621,KPWL:644-647,KVYG:724-727,KKYT:819-822	0	0	0	SignalP3NN:21,SignalP4:21,SignalP5:21,DeepSig:21,Phobius:21,SignalP6:21	1	0
XPS71045.1	0.794	0.44	2.508	.	.	.	.	0	0	0	.	.	0	.	0	0.009	0.494	.	.	0.656	0.964	0.378	0.48	1	1	0	0	33643.2	310	-2	5.353	1	105	167	104	34	181	55	27	28	0.974	VPTR:[LIJVAP]X[KRTPEI]R:168-171,LTDR:LXXR:227-230,LVGR:LXXR:268-271	RILC:5-8,KALV:21-24,KALA:57-60,KNLQ:89-92,RYYL:122-125,HFII:129-132,KIYQ:154-157,RFLT:171-174,REYT:223-226,HLLV:266-269,KQLY:303-306	0	0	0	SignalP3NN:22,SignalP3HMM:22,SignalP4:22,SignalP5:22,DeepSig:22,Phobius:22,SignalP6:22	1	1
XPS72878.1	0.794	-0.937	3.094	.	.	.	.	0	0	0	PF04389	Family:Peptidase_M28	0	.	0	0	0.171	.	.	0.781	0.832	0.486	0.34	1	1	0	0	52806.9	485	-2.5	5.949	4	165	283	138	52	259	101	51	50	1.018	LIYR:LXXR:311-314	KALE:46-49,RKLA:74-77,HTLS:83-86,RGIG:93-96,RDWL:99-102,RIIF:133-136,RLYV:155-158,RIFA:195-198,KTYK:226-229,RLFC:260-263,RNLG:290-293,RHIY:294-297,RLIY:310-313,RPFL:325-328,KQYG:357-360	0	0	1	SignalP3NN:21,SignalP4:21,Phobius:21,SignalP6:21	1	0
XPS68032.1	0.788	3.458	2.961	.	.	.	.	0	0	0	.	.	0	.	0	0.429	0.547	0.54	.	.	0.814	0.232	0.35	1	1	0	0	16698	155	-10	4.109	6	53	87	48	16	96	31	11	20	1.029	.	.	0	0	0	SignalP3NN:20,SignalP3HMM:20,SignalP4:20,SignalP5:20,DeepSig:20,Phobius:20,SignalP6:20	1	1
XPS79139.1	0.788	-3.726	-2.064	.	.	.	.	0	0	0	PF00226	Domain:DnaJ	0	.	0	0	0.219	0.675	.	.	0.025	0.573	0.02	0	1	0	1	45310.8	406	18	10.176	0	112	192	120	39	212	131	76	55	1.061	KR:[KR]R:187-188,RR:[KR]R:249-250,AKKR:[LIJVAP]X[KRTPEI]R:292-295,KR:[KR]R:294-295,KR:[KR]R:396-397	HEIF:26-29,KAYR:62-65,RELH:69-72,KVFL:78-81,KEID:106-109,HFLR:139-142,HYFA:178-181,KEFV:190-193,RYIR:195-198,RAWE:253-256,KRIV:294-297,KVLI:302-305,KFIY:348-351,RVLG:357-360,KELI:362-365	1	0	0	Phobius:18,SignalP3NN:20,SignalP4:20,DeepSig:20,SignalP6:20,SignalP3HMM:22,SignalP5:22	1	1
XPS76412.1	0.786	0.513	2.676	MoChi1,MpChi,MrChi	.	.	.	0	0	0	PF00704	Domain:Glyco_hydro_18	1	GH18	0	0	0.184	.	.	0.846	0.661	0.231	0.17	1	1	0	0	44140.7	399	-5	5.761	2	121	213	113	54	221	101	51	50	1.032	AEIR:[LIJVAP]X[KRTPEI]R:174-177,LMNR:LXXR:222-225,RR:[KR]R:225-226,KR:[KR]R:302-303	HNII:25-28,RFIV:37-40,KDWP:77-80,RKLF:121-124,KTMV:129-132,KAWE:162-165,KIIS:184-187,RDMI:195-198,RLYS:244-247,RGFR:249-252,KWFK:265-268,RALE:303-306,HYYM:320-323,RIFW:328-331,KALQ:376-379	0	0	0	SignalP3NN:22,SignalP3HMM:22,SignalP4:22,SignalP5:22,DeepSig:22,Phobius:22,SignalP6:22	1	1
XPS76335.1	0.777	0.447	2.99	.	.	.	.	0	0	0	.	.	0	.	0	0	0.056	.	0.551	.	0.004	0.604	0.86	1	1	0	0	14577	140	-5	4.241	2	69	95	39	12	70	21	8	13	0.667	VLPR:[LIJVAP]X[KRTPEI]R:19-22	RTFS:125-128	0	0	0	SignalP3HMM:17,SignalP5:17,DeepSig:17,Phobius:17,SignalP3NN:18,SignalP4:18,SignalP6:22	1	1
XPS75830.1	0.771	-1.801	3.249	.	.	.	.	0	0	0	PF00732,PF05199	Domain:GMC_oxred_N,Domain:GMC_oxred_C	0	AA3_1,AA3,AA3_2,AA3_3	0	0	0.013	.	.	0.809	0.037	0.234	0.83	1	1	0	0	59361.6	555	-3.5	5.692	6	203	327	166	57	309	98	49	49	0.992	KR:[KR]R:172-173,LKSR:LXXR:365-368,KR:[KR]R:447-448,IAER:[LIJVAP]X[KRTPEI]R:544-547,AVER:[LIJVAP]X[KRTPEI]R:548-551	KTLL:56-59,KSIF:94-97,KRYL:172-175,KEWL:183-186,KVFG:208-211,HPIF:212-215,KTYL:227-230,KVIR:246-249,RVIL:280-283,RNLS:306-309,KVFD:330-333,RELY:361-364,RSFG:423-426,KGIA:433-436,HNIF:458-461,KNLK:466-469,KVIG:515-518,RILA:551-554	0	0	0	SignalP3NN:19,SignalP3HMM:19,SignalP4:19,SignalP5:19,DeepSig:19,Phobius:19,SignalP6:19	1	1
XPS68015.1	0.77	0.098	3.26	MoCDIP1	.	.	.	0	0	0	PF12708	Repeat:Pectate_lyase_3	0	GH55	0	0	0.048	.	.	0.927	0.078	0.278	0.96	1	1	0	0	89260.3	834	-13	4.902	10	310	515	239	93	466	127	60	67	0.966	LHAR:LXXR:17-20,PSKR:[LIJVAP]X[KRTPEI]R:413-416,KR:[KR]R:415-416,LSAR:LXXR:444-447,VHTR:[LIJVAP]X[KRTPEI]R:571-574,VDTR:[LIJVAP]X[KRTPEI]R:680-683	RSYH:20-23,KEFG:91-94,RQIR:200-203,RNLT:281-284,HRYL:397-400,RYYT:426-429,RELG:447-450,KILF:475-478,HDLD:633-636,RGLH:651-654,HALY:672-675,RILR:739-742,RILS:776-779	0	1	0	SignalP3NN:16,SignalP4:16,SignalP5:19,DeepSig:19,SignalP6:19,Phobius:21	1	0
XPS71445.1	0.766	1.148	2.907	MpNEP1_1	.	.	.	0	0	0	PF06101	Family:Vps62	0	.	0	0	0.221	.	.	0.784	0.978	0.437	0.45	1	1	0	0	38498.1	350	-8.5	5.022	3	109	203	99	51	201	75	36	39	0.839	KR:[KR]R:249-250,LGFR:LXXR:280-283,LVPR:[LIJVAP]X[KRTPEI]R&LXXR:338-341	HVML:169-172,HDIP:229-232,KRWD:249-252,REYP:289-292,KKFV:305-308,KQLD:317-320	0	0	0	SignalP3NN:20,SignalP3HMM:20,SignalP4:20,SignalP5:20,Phobius:20,DeepSig:21,SignalP6:21	1	1
XPS71514.1	0.763	1.178	3.312	MoCDIP4	.	.	.	0	0	0	.	.	0	AA11,CBM19	0	0	0.049	.	.	0.513	0.016	0.461	0.83	1	1	0	0	42418.3	434	3.5	7.483	11	230	327	132	25	257	54	30	24	0.394	IQKR:[LIJVAP]X[KRTPEI]R:411-414,KR:[KR]R:413-414,RR:[KR]R:422-423	KVIK:99-102,KELP:167-170,RGYN:414-417,RGLV:425-428	0	0	0	SignalP3NN:20,SignalP3HMM:20,SignalP4:20,SignalP5:20,DeepSig:20,SignalP6:20,Phobius:25	1	1
XPS76709.1	0.762	1.493	3.307	.	.	.	.	0	0	0	PF00840	Domain:Glyco_hydro_7	0	GH7	0	0	0.184	.	0.687	.	0.11	0.442	0.92	1	1	0	0	48278.6	457	1	6.692	18	198	302	103	49	243	80	42	38	1.028	LDTR:[LIJVAP]X[KRTPEI]R&LXXR:298-301,KR:[KR]R:321-322	RSLA:3-6,HNIG:62-65,RTYL:128-131,KEFT:146-149,HDIK:198-201,KDFY:289-292,KRFY:321-324,KVYK:329-332,HVLV:381-384	0	0	0	SignalP3NN:18,SignalP3HMM:18,SignalP4:18,SignalP5:18,DeepSig:18,Phobius:18,SignalP6:18	1	1
XPS76336.1	0.76	1.627	3.091	.	.	.	.	0	0	0	.	.	0	.	0	0	0.275	0.512	.	.	0.024	0.311	0.35	1	1	0	0	55933.6	504	5	7.15	6	164	271	121	74	272	140	76	64	1.057	KR:[KR]R:63-64,AVKR:[LIJVAP]X[KRTPEI]R:79-82,KR:[KR]R:81-82	KMME:34-37,KKWK:55-58,KDID:91-94,REFI:123-126,HEMK:161-164,KKLL:187-190,KTFD:198-201,KKYA:232-235,KPYK:264-267,KKYY:290-293,RDIC:295-298,KGFN:315-318,RILD:423-426,KEIA:440-443,KYFG:499-502	1	0	0	SignalP3NN:18,SignalP3HMM:18,SignalP4:18,SignalP5:18,DeepSig:18,Phobius:18,SignalP6:18	1	1
XPS74880.1	0.76	0.04	3.24	CfTom1	.	.	.	0	0	0	PF01301,PF10435,PF13364,PF13363	Domain:Glyco_hydro_35,Domain:BetaGal_dom2,Domain:BetaGal_dom4_5,Domain:BetaGal_dom3	0	GH35	0	0	0.009	.	.	0.916	0.722	0.263	0.84	1	1	0	0	110261	1014	-16	4.984	2	341	588	289	136	583	191	91	100	1.04	PYKR:[LIJVAP]X[KRTPEI]R:35-38,KR:[KR]R:37-38,LIAR:LXXR:130-133,LRTR:[LIJVAP]X[KRTPEI]R&LXXR:158-161,AVIR:[LIJVAP]X[KRTPEI]R:370-373,RR:[KR]R:376-377,LNGR:LXXR:470-473,ITTR:[LIJVAP]X[KRTPEI]R:537-540,LLYR:LXXR:723-726,LNYR:LXXR:960-963	KGIV:2-5,RIFL:58-61,HPYR:67-70,KALG:85-88,KPFP:208-211,KGYN:240-243,HQLH:286-289,RVFY:329-332,KNLY:333-336,HKYD:500-503,HELA:518-521,KSIT:535-538,RGYT:540-543,KYID:673-676,KTYN:697-700,RPLT:703-706,RGYD:763-766,KEYT:784-787,RGIL:812-815	0	0	0	SignalP3NN:22,SignalP4:22,SignalP5:22,DeepSig:22,SignalP6:22,Phobius:24	1	0
XPS71713.1	0.76	0.009	3.071	CfTom1	.	.	.	0	0	0	PF01301,PF10435,PF13364,PF13363	Domain:Glyco_hydro_35,Domain:BetaGal_dom2,Domain:BetaGal_dom4_5,Domain:BetaGal_dom3	0	GH35,CBM67	0	0	0.01	.	.	0.883	0.974	0.584	0.83	1	1	0	0	108081	986	-9	5.287	2	334	566	272	135	547	184	90	94	1.137	ASIR:[LIJVAP]X[KRTPEI]R:351-354,LFTR:[LIJVAP]X[KRTPEI]R&LXXR:371-374,LNGR:LXXR:446-449,AGIR:[LIJVAP]X[KRTPEI]R:864-867,PQTR:[LIJVAP]X[KRTPEI]R:917-920	RVII:41-44,KDLQ:98-101,RLFD:102-105,KVWT:152-155,KGFR:221-224,KSWS:226-229,RTYY:264-267,HFFD:295-298,REIR:357-360,KQYK:364-367,KGLH:377-380,RFYL:411-414,KSYG:506-509,HVFV:573-576,KDLA:620-623,RKID:642-645,KPLT:683-686,KFYA:696-699,KVYR:702-705,RGIL:790-793,KNID:820-823,RWFT:867-870,KDLD:879-882,KYFP:910-913,RLIS:954-957,KQLQ:973-976	0	0	0	SignalP3NN:19,SignalP3HMM:19,SignalP4:19,SignalP5:19,DeepSig:19,Phobius:19,SignalP6:19	1	1
XPS69135.1	0.759	1.669	3.312	.	.	.	.	0	0	0	.	.	0	.	0	0.408	0.13	0.734	.	.	0.16	0.247	0.12	1	1	0	0	12637.1	111	5	10.117	0	34	57	32	8	56	49	27	22	0.447	PGRR:[LIJVAP]X[KRTPEI]R:36-39,RR:[KR]R:38-39,KR:[KR]R:43-44,PGRR:[LIJVAP]X[KRTPEI]R:58-61,RR:[KR]R:60-61,KR:[KR]R:63-64,PGRR:[LIJVAP]X[KRTPEI]R:70-73,RR:[KR]R:72-73,KR:[KR]R:75-76,PKRR:[LIJVAP]X[KRTPEI]R:82-85,KR:[KR]R:83-84,KR:[KR]R:87-88,PGRR:[LIJVAP]X[KRTPEI]R:94-97,RR:[KR]R:96-97,PKRR:[LIJVAP]X[KRTPEI]R:106-109,KR:[KR]R:107-108	RRYK:60-63,RRYK:72-75,RRYK:84-87,RRYT:96-99,RRYK:108-111	1	0	0	SignalP3NN:16,SignalP3HMM:16,SignalP4:16,SignalP5:16,DeepSig:16,Phobius:16,SignalP6:20	1	1
XPS71583.1	0.758	-0.379	3.312	.	.	.	.	0	0	0	.	.	0	.	0	0.06	0.164	.	.	0.662	0.919	0.368	0.78	1	1	0	0	8951.36	80	0	6.102	2	24	47	25	8	46	14	7	7	1.375	.	KVIA:5-8,KLMD:45-48,RMIC:69-72	0	0	0	SignalP3NN:19,SignalP5:24,SignalP3HMM:25,SignalP4:25,DeepSig:25,Phobius:25,SignalP6:25	1	1
XPS69045.1	0.755	2.807	1.021	.	.	.	.	0	0	0	.	.	0	.	0	0.525	0.77	0.806	.	.	0.543	0.414	0.8	0	0	0	0	4101.8	38	2.5	8.524	2	16	21	9	5	23	7	5	2	1.222	.	KAFM:8-11,RQIC:27-30	0	0	0	.	0	0
XPS75954.1	0.751	0.302	1.836	.	.	.	.	0	0	0	.	.	0	.	0	0.943	0.472	.	.	0.696	0.014	0.401	0.59	1	1	0	0	12501.6	112	10	10.598	5	39	59	36	14	64	20	16	4	0.913	VHTR:[LIJVAP]X[KRTPEI]R:54-57	HEFS:5-8,RGLA:68-71,RLIK:90-93	0	1	0	SignalP3NN:22,SignalP3HMM:22,SignalP4:22,SignalP5:22,DeepSig:22,Phobius:22	1	1
XPS68202.1	0.751	2.364	2.563	.	.	.	.	0	0	0	.	.	0	.	0	0.007	0.502	0.732	.	.	0.093	0.459	0.27	1	1	0	0	38448.9	355	8.5	8.294	8	110	187	90	34	191	95	54	41	1.056	AIIR:[LIJVAP]X[KRTPEI]R:97-100,LTSR:LXXR:163-166	HILS:16-19,KALH:44-47,KIWG:179-182,KAIG:189-192,KKYL:251-254,HILY:274-277,RPLL:284-287,KFFK:292-295,KGLK:319-322,KVFW:341-344	1	0	0	SignalP3NN:22,SignalP3HMM:22,SignalP4:22,SignalP5:22,DeepSig:22,Phobius:22,SignalP6:22	1	1
XPS78350.1	0.748	-4.249	-1.303	.	.	.	.	0	0	0	PF01946	Family:Thi4	0	.	0	0.005	0.406	.	.	0.772	0.244	0.452	0.07	0	0	0	0	35886	333	-4	5.42	2	109	188	111	28	192	77	38	39	0.75	APIR:[LIJVAP]X[KRTPEI]R:55-58,AMTR:[LIJVAP]X[KRTPEI]R:65-68,RR:[KR]R:68-69,ASKR:[LIJVAP]X[KRTPEI]R:99-102,KR:[KR]R:101-102,LITR:[LIJVAP]X[KRTPEI]R&LXXR:187-190,APTR:[LIJVAP]X[KRTPEI]R:192-195,KR:[KR]R:249-250,LDMR:LXXR:266-269,IVKR:[LIJVAP]X[KRTPEI]R:275-278,KR:[KR]R:277-278	KNLA:24-27,KTLA:40-43,RAMT:64-67,RRYF:68-71,KDLD:72-75,HLFL:137-140,KVLQ:169-172,KLFN:177-180,KRLV:249-252,RGLD:264-267,REIV:280-283	0	0	0	.	0	0
XPS67738.1	0.748	-1.508	-1.285	.	.	.	.	0	0	0	.	.	0	.	0	0.647	0.349	0.618	.	.	0.881	0.427	0.09	0	0	0	0	26840.4	245	-4.5	5.143	2	80	138	83	28	133	64	31	33	0.904	ALER:[LIJVAP]X[KRTPEI]R:39-42,RR:[KR]R:44-45,KR:[KR]R:68-69,LTRR:[LIJVAP]X[KRTPEI]R&LXXR:81-84,RR:[KR]R:83-84	RRLA:44-47,KQLQ:92-95,HLWK:97-100,RTLA:128-131,KPLF:158-161,HEMN:184-187	0	0	0	.	0	0
XPS71429.1	0.745	-1.421	2.592	.	.	.	.	0	0	0	PF00194	Domain:Carb_anhydrase	0	.	0	0.004	0.131	.	.	0.696	0.842	0.521	0.83	1	1	0	0	29534.1	278	-14.5	4.274	4	100	166	87	27	150	51	20	31	1.083	KR:[KR]R:24-25	HGLS:18-21,HHIN:128-131,KKIV:243-246,RFIQ:251-254	0	0	0	SignalP3NN:14,Phobius:14,SignalP6:14,SignalP3HMM:19,SignalP5:19,DeepSig:28	1	1
XPS76140.1	0.742	-0.381	3.307	.	.	.	.	0	0	0	.	.	0	CE15,CE19	0	0	0.215	.	.	0.668	0.034	0.586	0.76	1	1	0	0	40867.3	390	6.5	8.481	6	155	241	122	35	222	63	36	27	0.85	IEER:[LIJVAP]X[KRTPEI]R:20-23,KR:[KR]R:199-200,LVKR:[LIJVAP]X[KRTPEI]R&LXXR:219-222,KR:[KR]R:221-222,VAPR:[LIJVAP]X[KRTPEI]R:290-293	KFFD:46-49,KSIT:103-106,KFYN:160-163,RIID:183-186,KRIA:221-224,KNIQ:250-253,HQLA:284-287,RGLL:293-296,RLIY:318-321,KALG:322-325,KFLL:357-360	1	0	0	SignalP3NN:16,SignalP3HMM:16,SignalP4:16,SignalP5:16,DeepSig:16,Phobius:16,SignalP6:23	1	1
XPS79650.1	0.741	0.488	3.298	.	.	.	.	0	0	0	PF00264	Domain:Tyrosinase	0	.	0	0	0.405	.	.	0.764	0.873	0.655	0.47	1	1	0	0	43040	391	2.5	6.94	8	134	225	110	47	207	79	43	36	0.933	VTTR:[LIJVAP]X[KRTPEI]R:97-100,KR:[KR]R:111-112,PRIR:[LIJVAP]X[KRTPEI]R:119-122,RR:[KR]R:122-123,LQAR:LXXR:143-146,LWHR:LXXR:181-184,VRIR:[LIJVAP]X[KRTPEI]R:372-375	RPLS:53-56,RDLD:100-103,REWD:123-126,KCLQ:141-144,KFLL:178-181,HRYY:183-186,RDLP:202-205,HCLA:258-261,HAWG:298-301,HAFI:325-328,RNFR:330-333,RDIL:375-378	0	1	0	SignalP3NN:18,SignalP3HMM:18,SignalP4:18,SignalP5:18,DeepSig:18,Phobius:18,SignalP6:18	1	1
XPS77178.1	0.736	1.999	3.303	.	.	.	.	0	0	0	PF01083	Domain:Cutinase	1	CE5	0	0.3	0.271	.	.	0.75	0.083	0.244	0.69	1	1	0	0	23507.7	228	3.5	8.463	4	100	141	80	16	137	34	19	15	0.611	LEVR:LXXR:28-31,ASTR:[LIJVAP]X[KRTPEI]R:35-38,ALER:[LIJVAP]X[KRTPEI]R:77-80,LRDR:LXXR:156-159,LRGR:LXXR:222-225	KLLA:2-5,RQFG:31-34,KAIF:51-54,RAYG:80-83,RLFK:119-122,KAIP:176-179,KIYC:187-190	0	0	0	SignalP3NN:15,SignalP4:15,SignalP3HMM:21,SignalP5:21,DeepSig:21,Phobius:21,SignalP6:31	1	1
XPS73037.1	0.736	-2.451	3.061	.	.	.	.	0	0	0	PF03636,PF03632	Family:Glyco_hydro_65N,Repeat:Glyco_hydro_65m	0	GH65,CBM32	0	0	0.009	.	.	0.984	0.015	0.334	0.84	1	1	0	0	111614	1010	-31	4.626	7	328	579	275	151	560	181	81	100	1.076	LFSR:LXXR:89-92,RR:[KR]R:92-93,VDKR:[LIJVAP]X[KRTPEI]R:230-233,KR:[KR]R:232-233,LIQR:LXXR:578-581,LDYR:LXXR:764-767,VGTR:[LIJVAP]X[KRTPEI]R:813-816	RVLA:7-10,HALD:44-47,RYYW:170-173,HKLY:192-195,KRFE:232-235,HVLA:375-378,HMIV:516-519,HFFG:539-542,RHFT:581-584,RTFY:767-770,HGIN:774-777,KPIP:807-810,KILT:840-843,KTYV:961-964	0	0	0	Phobius:18,SignalP3NN:20,SignalP4:20,SignalP5:20,DeepSig:20,SignalP6:20	1	0
XPS69828.1	0.736	-1.916	3.278	.	.	.	.	0	0	0	.	.	0	.	0	0	0.01	.	.	0.858	0.002	0.445	0.85	1	1	0	0	66350.6	634	-3.5	5.192	10	252	420	189	42	352	97	47	50	0.716	RR:[KR]R:295-296,ATPR:[LIJVAP]X[KRTPEI]R:300-303,PYTR:[LIJVAP]X[KRTPEI]R:321-324,RR:[KR]R:625-626,RR:[KR]R:627-628	KNLI:59-62,RPIA:95-98,RVIG:265-268,REYL:324-327,RGLV:374-377,KKMT:569-572	1	0	0	SignalP3NN:19,SignalP3HMM:19,SignalP4:19,SignalP5:19,DeepSig:19,Phobius:19,SignalP6:19	1	1
XPS67752.1	0.733	1.078	3.307	MoCDIP1	.	.	.	0	0	0	PF00544,PF00734	Repeat:Pectate_lyase_4,Domain:CBM_1	1	PL1_4,PL1,PL1_5,PL1_7,PL1_10,CBM1,PL1_13,PL1_11,PL1_9,PL1_8,PL1_2	0	0	0.073	.	.	0.673	0.943	0.691	0.87	1	1	0	0	48763.4	479	6.5	7.981	10	224	323	149	42	268	90	50	40	0.72	LVGR:LXXR:190-193	KAYG:23-26,KYLS:50-53,RVIL:58-61,KEFD:64-67,KSIL:126-129,KGLS:140-143,RMFI:193-196,HYWT:226-229,RNYY:243-246,HAIN:266-269,HAFD:278-281	0	0	0	SignalP3HMM:17,SignalP5:17,DeepSig:17,Phobius:17,SignalP3NN:19,SignalP4:19,SignalP6:19	1	1
XPS72916.1	0.733	1.001	3.309	CfTom1	.	.	.	0	0	0	PF00150,PF00734	Domain:Cellulase,Domain:CBM_1	1	GH5_5,GH5,GH5_4,GH5_25,GH5_8,CBM1,GH5_39,GH5_37,GH5_2,GH5_40,GH5_46,GH5_55,GH5_47,GH5_36	0	0	0.013	.	.	0.539	0.372	0.417	0.88	1	1	0	0	45448.5	439	-0.5	6.393	12	210	290	131	45	243	66	35	31	0.692	.	KHFA:165-168,HLLN:184-187,HNYA:221-224,KNIA:256-259,HDLT:267-270,KLIF:328-331,HRYL:334-337,KAIL:370-373,KCFS:434-437	0	1	0	SignalP3NN:17,SignalP4:18,DeepSig:18,SignalP6:18,SignalP3HMM:24,SignalP5:24,Phobius:24	1	1
XPS77027.1	0.732	0.314	2.71	.	.	.	.	0	0	0	.	.	0	.	0	0.066	0.377	.	.	0.574	0.941	0.657	0.73	1	1	0	0	29395.1	270	-9.5	4.46	1	81	156	87	33	158	49	21	28	1.19	KR:[KR]R:28-29,LYRR:[LIJVAP]X[KRTPEI]R&LXXR:135-138,RR:[KR]R:137-138,LFGR:LXXR:230-233,RR:[KR]R:233-234	KRLI:28-31,RRIL:137-140,HSIT:146-149,KKIA:181-184,RRLT:233-236	0	0	0	SignalP3NN:21,SignalP3HMM:21,SignalP4:21,SignalP5:21,DeepSig:21,Phobius:21,SignalP6:21	1	1
XPS80971.1	0.732	-0.613	3.299	.	.	.	.	0	0	0	.	.	0	GH74	0	0	0.232	.	.	0.866	0.965	0.471	0.59	1	1	0	0	37733	356	1	6.748	4	150	217	100	43	204	66	35	31	0.696	VSER:[LIJVAP]X[KRTPEI]R:52-55,ISKR:[LIJVAP]X[KRTPEI]R:336-339,KR:[KR]R:338-339	RGLE:2-5,RGLS:47-50,RDIE:94-97,RIYQ:116-119,KSWK:125-128,HGLA:150-153,RLIE:163-166,RWYI:205-208,RVFR:217-220,HHWN:225-228,KSWH:278-281,KNWQ:320-323,KRIC:338-341	0	1	0	SignalP3NN:21,SignalP3HMM:21,SignalP4:21,SignalP5:21,DeepSig:21,Phobius:21,SignalP6:21	1	1
XPS74581.1	0.731	-1.239	2.801	.	.	.	.	0	0	0	PF00246,PF02244	Domain:Peptidase_M14,Domain:Propep_M14	0	.	0	0	0.171	.	.	0.762	0.551	0.25	0.71	1	1	0	0	45772.2	421	3.5	7.19	4	159	242	122	56	228	82	45	37	1.051	LEGR:LXXR:151-154	KLLG:2-5,KVFR:31-34,KDFE:83-86,KIMH:88-91,HALA:122-125,KSLE:149-152,RDIK:154-157,HIWG:160-163,REWI:182-185,RLWR:233-236,RDIN:250-253,RNWP:254-257,KSWS:259-262,KALK:288-291,KGIQ:301-304,HSYS:310-313,KNMT:418-421	0	0	0	SignalP3NN:16,SignalP3HMM:16,SignalP4:16,SignalP5:16,DeepSig:16,Phobius:16,SignalP6:16	1	1
XPS74692.1	0.725	5.37	3.307	MoCDIP4,ChNIS1,CoNIS1	.	.	.	0	0	0	PF03443	Family:AA9	1	AA9	0	0.081	0.517	.	0.688	.	0.764	0.477	0.76	1	1	0	0	25918.2	246	6	8.207	6	102	157	69	35	158	33	21	12	0.646	.	KYIA:2-5,HGYV:17-20,KPYT:28-31,REIQ:50-53,KCIP:165-168,HEII:176-179,HQLK:197-200	0	0	0	SignalP3NN:16,SignalP3HMM:16,SignalP4:16,Phobius:16,SignalP6:16,SignalP5:18	1	1
XPS78590.1	0.721	3.378	2.705	MoHTR1,PIIN_08944	.	.	.	0	0	0	.	.	0	.	0	0.945	0.597	.	.	0.888	0.313	0.384	0.48	1	1	0	0	27940.5	256	2	6.756	9	89	141	63	37	149	52	30	22	0.681	RR:[KR]R:205-206,LRPR:[LIJVAP]X[KRTPEI]R&LXXR:249-252,RR:[KR]R:252-253	RSLS:4-7,HMYG:49-52,HGLA:60-63,HPFR:106-109,RHLK:206-209,HGII:242-245	1	0	0	SignalP3NN:16,SignalP3HMM:16,Phobius:18,SignalP6:20,SignalP5:21	1	1
XPS75852.1	0.718	1.147	2.936	.	.	.	.	0	0	0	.	.	0	.	0	0.008	0.527	.	.	0.61	0.964	0.252	0.34	1	1	0	0	35436.8	318	-1	6.299	5	108	168	81	45	173	77	40	37	0.912	KR:[KR]R:62-63,KR:[KR]R:109-110	HNIK:34-37,KKFT:82-85,RSLG:155-158,KDYQ:196-199,RAFS:248-251,KNIR:266-269,KTLR:294-297,HALL:312-315	0	0	0	SignalP3NN:19,SignalP3HMM:19,SignalP4:19,DeepSig:19,Phobius:19,SignalP6:19	1	1
XPS72111.1	0.716	-1.08	2.93	.	.	.	.	0	0	0	PF00491	Domain:Arginase	0	.	0	0	0.182	.	.	0.733	0.064	0.275	0.37	1	1	0	0	42486.7	394	-8	5.229	3	135	219	114	45	223	92	45	47	0.856	RR:[KR]R:103-104,LLSR:LXXR:153-156,AGIR:[LIJVAP]X[KRTPEI]R:251-254,IRER:[LIJVAP]X[KRTPEI]R:291-294	RRLN:103-106,KVID:125-128,HNLL:150-153,RLLT:176-179,HTIT:184-187,RSIN:192-195,RNYG:196-199,KVFG:216-219,REID:277-280,KKIR:289-292,RELR:329-332,RGLE:336-339	0	1	0	SignalP3NN:16,SignalP4:16,DeepSig:16,SignalP3HMM:18,SignalP5:18,Phobius:18,SignalP6:18	1	1
XPS69167.1	0.713	0.93	2.043	.	.	.	.	0	0	0	.	.	0	.	0	0.001	0.337	0.503	.	.	0.248	0.192	0.33	1	1	1	0	38663.2	352	-4.5	5.428	8	117	198	77	38	182	93	46	47	1.063	PGIR:[LIJVAP]X[KRTPEI]R:53-56,PPKR:[LIJVAP]X[KRTPEI]R:245-248,KR:[KR]R:247-248,KR:[KR]R:250-251,KR:[KR]R:257-258,LSRR:[LIJVAP]X[KRTPEI]R&LXXR:330-333,RR:[KR]R:332-333	RIFD:56-59,RDIG:63-66,KDIK:81-84,KAWY:124-127,KCIW:153-156,HLYD:202-205,KVLV:233-236,HHFP:259-262,KLIT:264-267,RELC:276-279,KSMG:283-286,RHIP:339-342,KDYN:344-347	1	0	0	SignalP5:21,DeepSig:21,SignalP3NN:22	1	0
XPS80212.1	0.711	1.273	3.312	.	.	.	.	0	0	0	.	.	0	.	0	0	0.057	0.655	0.552	.	0.858	0.431	0.83	1	1	0	0	45644.3	475	-0.5	5.755	2	247	333	131	9	247	22	11	11	0.406	.	KYIL:2-5,KAII:127-130	0	0	0	SignalP3NN:16,SignalP3HMM:16,SignalP4:16,SignalP5:16,DeepSig:16,Phobius:16,SignalP6:16	1	1
XPS69320.1	0.708	-1.566	3.153	.	.	.	.	0	0	0	PF04389	Family:Peptidase_M28	0	.	0	0	0.065	.	.	0.827	0.618	0.515	0.74	1	1	0	0	40773.9	383	0.5	6.585	3	159	226	121	44	205	71	38	33	0.909	AQKR:[LIJVAP]X[KRTPEI]R:74-77,KR:[KR]R:76-77	RYYK:124-127,RAFT:157-160,RVLL:218-221,HWYA:238-241,KAML:265-268,KVIT:301-304,KYIH:346-349,HMLE:362-365	0	0	0	SignalP3NN:18,SignalP3HMM:18,SignalP4:18,SignalP5:18,DeepSig:18,Phobius:18,SignalP6:18	1	1
XPS81720.1	0.706	0.602	3.296	MoCDIP4,ChNIS1,CoNIS1,MoNIS1	.	.	.	0	0	0	PF03443	Family:AA9	1	AA9	0	0	0.029	.	.	0.763	0.843	0.566	0.74	1	1	0	0	33580.1	327	-12	4.462	2	147	220	103	38	194	52	22	30	0.583	.	HGYE:140-143,KMIG:151-154,HEII:176-179	0	0	0	SignalP3NN:17,SignalP3HMM:17,SignalP4:17,SignalP6:17,SignalP5:19,Phobius:23	1	1
XPS75331.1	0.702	-1.479	3.283	.	.	.	.	0	0	0	PF07732,PF07731,PF00394	Domain:Cu-oxidase_3,Domain:Cu-oxidase_2,Domain:Cu-oxidase	0	AA1_3,AA1,AA1_1,AA1_2	0	0	0.045	.	.	0.822	0.841	0.583	0.86	1	1	0	0	62725	577	-1.5	6.351	8	212	348	148	76	317	97	52	45	0.948	LVER:[LIJVAP]X[KRTPEI]R&LXXR:25-28,ARTR:[LIJVAP]X[KRTPEI]R:37-40,PTIR:[LIJVAP]X[KRTPEI]R:97-100,PTRR:[LIJVAP]X[KRTPEI]R:491-494,RR:[KR]R:493-494	RSLA:4-7,RQFQ:85-88,RQLN:128-131,RQYK:152-155,KKYR:253-256,RIIN:258-261,HPFT:275-278,KTYI:288-291,RWLI:404-407,HEMS:438-441,HPIH:460-463,HDFY:467-470,HPYN:568-571	0	0	0	SignalP3NN:20,SignalP3HMM:20,SignalP4:20,SignalP5:20,DeepSig:20,Phobius:28,SignalP6:28	1	1
XPS80753.1	0.702	-1.956	3.289	.	.	.	.	0	0	0	PF16010,PF00732,PF05199	Family:CDH-cyt,Domain:GMC_oxred_N,Domain:GMC_oxred_C	0	AA3_1,AA3_2,AA3,AA8,AA3_3	0	0	0.032	.	.	0.924	0.024	0.288	0.86	1	1	0	0	82575.1	782	16.5	9.201	7	310	486	234	81	451	130	76	54	0.785	LVYR:LXXR:142-145,AMKR:[LIJVAP]X[KRTPEI]R:443-446,KR:[KR]R:445-446,AVKR:[LIJVAP]X[KRTPEI]R:456-459,KR:[KR]R:458-459,LLFR:LXXR:503-506,LKKR:[LIJVAP]X[KRTPEI]R&LXXR:579-582,KR:[KR]R:581-582,RR:[KR]R:711-712	KAYD:177-180,KVLL:271-274,RAFQ:369-372,KLYK:385-388,RTYS:418-421,KLWT:450-453,RVIR:459-462,RVIL:490-493,KLLF:502-505,KTFI:526-529,RQFQ:609-612,HSMT:626-629,KSMI:674-677,KAIQ:678-681,HWIG:715-718,KVYG:740-743,KILA:777-780	1	0	0	SignalP3NN:22,SignalP4:22,DeepSig:22,SignalP5:24,Phobius:24,SignalP6:24	1	0
XPS72992.1	0.702	0.348	3.311	MoCDIP4	.	.	.	0	0	0	PF16010,PF00732,PF05199,PF00734	Family:CDH-cyt,Domain:GMC_oxred_N,Domain:GMC_oxred_C,Domain:CBM_1	1	AA3_1,AA3_2,AA3,AA8,AA3_3,CBM1	0	0	0.011	.	.	0.793	0.322	0.402	0.8	1	1	0	0	95948.5	925	-32.5	4.321	9	405	618	265	84	520	150	61	89	0.67	AAER:[LIJVAP]X[KRTPEI]R:264-267,LIER:[LIJVAP]X[KRTPEI]R&LXXR:277-280,AAER:[LIJVAP]X[KRTPEI]R:367-370,VWER:[LIJVAP]X[KRTPEI]R:371-374,KR:[KR]R:386-387,RR:[KR]R:897-898,VVRR:[LIJVAP]X[KRTPEI]R:904-907,RR:[KR]R:906-907	RSLI:3-6,HGYT:34-37,RDFD:349-352,RVWE:370-373,KRYN:386-389,KFFA:398-401,RTYL:438-441,KLMM:451-454,KVIR:457-460,RVIY:480-483,RILF:502-505,HPIF:545-548,KVYL:622-625,RLLQ:666-669,KSFK:696-699,KVYG:725-728,RILA:762-765,RNIK:907-910	1	0	0	SignalP3HMM:18,SignalP5:18,Phobius:18,SignalP6:18,SignalP3NN:20,SignalP4:20,DeepSig:20	1	1
XPS80518.1	0.702	-1.8	3.302	.	.	.	.	0	0	0	PF01565,PF08031	Domain:FAD_binding_4,Domain:BBE	0	AA7	0	0	0.01	.	.	0.9	0.991	0.524	0.8	1	1	0	0	67118.9	617	3.5	7.16	7	228	361	167	75	334	108	58	50	0.952	LNGR:LXXR:156-159,IWTR:[LIJVAP]X[KRTPEI]R:168-171,IIPR:[LIJVAP]X[KRTPEI]R:310-313,LLGR:LXXR:442-445,LGRR:[LIJVAP]X[KRTPEI]R:443-446,RR:[KR]R:445-446,KR:[KR]R:572-573	RFFL:2-5,KPLD:26-29,RTIP:51-54,KNIR:143-146,HDLN:154-157,RNFR:171-174,RTYG:242-245,KHYP:295-298,KFFP:356-359,KPFN:365-368,RLLG:441-444,RELV:446-449,RYLK:458-461,HFIS:506-509,KALD:524-527,KWYE:531-534,REWA:542-545,RNFA:560-563,KDYY:564-567,KRLR:572-575,HGLA:612-615	0	1	0	SignalP3NN:14,SignalP4:14,SignalP5:14,DeepSig:14,Phobius:14,SignalP6:14	1	0
XPS76364.1	0.702	-1.982	3.196	.	.	.	.	0	0	0	PF00723,PF00686	Repeat:Glyco_hydro_15,Family:CBM_20	0	GH15,CBM20	0	0	0.01	.	.	0.93	0.983	0.529	0.89	1	1	0	0	62800.1	589	3.5	7.801	8	247	374	180	68	330	95	50	45	0.831	LESR:LXXR:27-30,LVER:[LIJVAP]X[KRTPEI]R&LXXR:94-97,RR:[KR]R:460-461,PNRR:[LIJVAP]X[KRTPEI]R:568-571,RR:[KR]R:570-571	RALP:8-11,KALV:92-95,RFIA:97-100,KDLA:191-194,RYWN:198-201,RALV:224-227,HTFD:286-289,RALA:305-308,KGIA:325-328,KDLV:384-387,KTYA:410-413,KALS:523-526,KYIR:552-555,RRFT:570-573	0	0	0	SignalP3NN:21,SignalP3HMM:21,SignalP4:21,SignalP5:21,DeepSig:21,Phobius:21,SignalP6:30	1	1
XPS78760.1	0.702	-2.34	3.135	.	.	.	.	0	0	0	PF01915,PF00933,PF14310	Domain:Glyco_hydro_3_C,Domain:Glyco_hydro_3,Family:Fn3-like	0	GH3	0	0	0.009	.	.	0.97	0.028	0.389	0.85	1	1	0	0	84285.7	791	-14.5	4.813	7	285	481	247	85	469	127	59	68	0.774	ALER:[LIJVAP]X[KRTPEI]R:46-49,PIER:[LIJVAP]X[KRTPEI]R:79-82,LAIR:[LIJVAP]X[KRTPEI]R&LXXR:95-98,PLTR:[LIJVAP]X[KRTPEI]R:749-752,LTRR:LXXR:750-753,RR:[KR]R:752-753,LPLR:LXXR:783-786	RTLS:3-6,RPLV:118-121,RNWE:156-159,HGIQ:177-180,KHYI:189-192,KTMH:220-223,KTLN:258-261,RIMT:334-337,RDLG:389-392,KNIG:412-415,RSYG:474-477,KSWA:510-513,KNLI:606-609,KEFD:636-639,RSLR:728-731,RDLS:753-756,RKLP:781-784	0	0	0	SignalP3NN:16,SignalP4:16,SignalP5:16,DeepSig:16,SignalP6:16,Phobius:23	1	0
XPS78044.1	0.701	0.713	2.623	.	.	.	.	0	0	0	PF11913	Family:DUF3431	0	.	0	0.641	0.401	.	.	0.655	0.91	0.518	0.6	1	1	0	0	19600.5	185	6	9.429	2	67	111	61	17	117	30	19	11	0.533	LLPR:[LIJVAP]X[KRTPEI]R&LXXR:80-83,KR:[KR]R:103-104	.	0	0	0	Phobius:21,DeepSig:27,SignalP3NN:29,SignalP3HMM:29,SignalP4:29,SignalP5:29	1	1
XPS80196.1	0.695	-0.648	1.892	.	.	.	.	0	0	0	.	.	0	.	0	0.258	0.339	.	.	0.618	0.758	0.343	0.11	1	1	0	0	23733.6	214	-5.5	4.967	2	69	111	59	26	116	55	26	29	0.694	LAVR:LXXR:10-13,KR:[KR]R:125-126	RWLG:2-5,KVFY:84-87,RELI:106-109,REWI:121-124,RHYS:131-134	0	0	0	SignalP3NN:16,SignalP3HMM:16,SignalP4:16,SignalP5:16,DeepSig:16,SignalP6:16,Phobius:30	1	1
XPS69071.1	0.694	-0.445	2.269	.	.	.	.	0	0	0	.	.	0	.	0	0.011	0.41	.	.	0.698	0.351	0.417	0.16	1	1	0	0	32852.4	292	-4.5	5.736	4	79	148	90	37	162	73	37	36	1	RR:[KR]R:263-264	RLLS:2-5,HILS:23-26,HHIV:53-56,RQYI:122-125,HVIA:127-130,HTII:158-161,RDLG:244-247,RRML:263-266,RPWV:286-289	0	0	0	SignalP3NN:18,SignalP3HMM:18,SignalP4:18,SignalP5:18,DeepSig:18,Phobius:18,SignalP6:18	1	1
XPS80248.1	0.693	-1.896	2.534	.	.	.	.	0	0	0	.	.	0	.	0	0	0.098	.	.	0.729	0.009	0.637	0.58	1	1	0	0	34324.1	308	-11	4.664	5	102	173	81	48	167	75	34	41	1.06	IHRR:[LIJVAP]X[KRTPEI]R:27-30,RR:[KR]R:29-30,KR:[KR]R:57-58	KTFT:41-44,RDLS:58-61,KTWN:63-66,KNYG:93-96,KQYN:133-136,KWIS:137-140,KNIL:165-168,RFFH:195-198,RHYD:212-215,HIFL:251-254,HTFA:259-262,RDWW:296-299,RNIK:300-303	0	0	0	SignalP3NN:16,SignalP4:16,DeepSig:16,Phobius:16,SignalP3HMM:18,SignalP5:18,SignalP6:30	1	1
XPS70400.1	0.692	-0.412	3.234	.	.	.	.	0	0	0	.	.	0	.	0	0	0.203	.	.	0.625	0.009	0.613	0.46	1	1	0	0	55388.1	502	5.5	7.304	6	155	271	131	67	269	130	71	59	1.217	AQPR:[LIJVAP]X[KRTPEI]R:241-244,PDRR:[LIJVAP]X[KRTPEI]R:286-289,RR:[KR]R:288-289,KR:[KR]R:499-500	HLMK:32-35,KLWP:55-58,KNYE:61-64,KGLA:78-81,REFG:127-130,REIR:166-169,KLLT:193-196,KVFD:203-206,KDLT:209-212,HNIV:225-228,RRYR:288-291,RNIC:293-296,RNWH:340-343,KGID:391-394,HNLY:395-398,HDIR:416-419,HFLF:457-460	1	0	0	SignalP3NN:16,SignalP3HMM:16,SignalP4:16,SignalP5:16,Phobius:16,SignalP6:16	1	1
XPS81599.1	0.691	-1.632	3.216	.	.	.	.	0	0	0	PF00732,PF05199	Domain:GMC_oxred_N,Domain:GMC_oxred_C	0	AA3_1,AA3,AA3_2,AA3_3	0	0	0.01	.	.	0.787	0.849	0.242	0.82	1	1	0	0	61828.6	579	-4.5	5.652	3	210	355	167	57	321	106	53	53	0.908	VSER:[LIJVAP]X[KRTPEI]R:56-59,VLER:[LIJVAP]X[KRTPEI]R:69-72,AAKR:[LIJVAP]X[KRTPEI]R:162-165,KR:[KR]R:164-165	RTYE:165-168,HYYD:181-184,KFFA:193-196,KVYS:214-217,RTYL:233-236,KDLP:240-243,KVLR:252-255,RSII:275-278,KVIL:285-288,RILF:297-300,HTIL:339-342,RLMS:384-387,KAIE:456-459,KVYG:529-532,KIIA:566-569	0	0	0	Phobius:19,SignalP3NN:21,SignalP3HMM:21,SignalP4:21,SignalP5:21,DeepSig:21,SignalP6:21	1	1
XPS75064.1	0.69	4.549	3.168	PpCBEL	.	.	.	0	0	0	PF14295	Domain:PAN_4	0	.	0	0.023	0.36	0.572	0.663	.	0.2	0.631	0.78	1	1	0	0	28840.8	276	11	8.489	14	129	186	62	19	119	48	31	17	0.951	LMVR:LXXR:21-24,VDER:[LIJVAP]X[KRTPEI]R:121-124,KR:[KR]R:171-172	KSFC:65-68,KLYS:79-82,KSFT:232-235,KLYS:246-249,KAYD:268-271	0	0	0	SignalP3NN:18,SignalP3HMM:18,SignalP4:18,SignalP5:18,DeepSig:18,Phobius:18,SignalP6:24	1	1
XPS78172.1	0.69	-0.044	3.173	.	.	.	.	0	0	0	PF03659	Family:Glyco_hydro_71	0	GH71	0	0	0.323	.	.	0.772	0.988	0.567	0.71	1	1	0	0	48236.2	437	3.5	7.071	2	141	246	113	65	232	95	52	43	1.33	AVER:[LIJVAP]X[KRTPEI]R:20-23,RR:[KR]R:23-24,AHTR:[LIJVAP]X[KRTPEI]R:42-45,RR:[KR]R:229-230,LEYR:LXXR:235-238,AWKR:[LIJVAP]X[KRTPEI]R:300-303,KR:[KR]R:302-303	HYMI:33-36,KALG:52-55,KKYT:110-113,KSID:169-172,KGIV:187-190,KLFM:207-210,KHLD:219-222,HYMG:262-265,KGYW:288-291,HTLT:326-329,KQLG:375-378	0	0	0	SignalP3NN:20,SignalP3HMM:20,SignalP4:20,SignalP5:20,DeepSig:20,Phobius:20,SignalP6:20	1	1
XPS80417.1	0.689	-3.499	1.655	.	.	.	.	0	0	0	PF00246	Domain:Peptidase_M14	0	.	0	0	0.011	.	.	0.903	0.742	0.399	0.04	1	1	0	0	63624.5	564	-5	6.18	5	165	284	164	80	299	154	81	73	0.756	RR:[KR]R:45-46,AIIR:[LIJVAP]X[KRTPEI]R:50-53,ADIR:[LIJVAP]X[KRTPEI]R:122-125,LRPR:[LIJVAP]X[KRTPEI]R&LXXR:251-254,LLPR:[LIJVAP]X[KRTPEI]R&LXXR:461-464	RRLS:45-48,RTIW:53-56,KALA:101-104,HPFL:194-197,KLMA:211-214,RHIA:222-225,RDIP:233-236,REWI:266-269,HLIN:280-283,RLLE:293-296,RLWR:319-322,RSYP:340-343,HAFE:364-367,HSYS:396-399,KAIR:429-432,HAYK:438-441,RTLL:459-462,HDLK:478-481,RFML:521-524	1	0	0	SignalP3NN:20,SignalP3HMM:20,SignalP4:20,SignalP5:20,DeepSig:20,Phobius:20,SignalP6:20	1	1
XPS67881.1	0.688	-0.14	2.684	.	.	.	.	0	0	0	PF04389	Family:Peptidase_M28	0	.	0	0	0.337	.	.	0.633	0.867	0.223	0.04	1	1	0	0	41731	375	-3	6.008	4	116	192	112	49	199	94	48	46	1.208	IKPR:[LIJVAP]X[KRTPEI]R:22-25,RR:[KR]R:88-89,KR:[KR]R:100-101,LEAR:LXXR:184-187	KAIA:2-5,RALY:25-28,HFFD:57-60,RRLF:88-91,RNLE:101-104,KAFP:145-148,HALW:149-152,KSIV:155-158,RVLL:206-209,KDFG:212-215,HWYA:226-229,RIID:293-296,HVLQ:354-357	0	0	0	SignalP3NN:17,SignalP3HMM:17,SignalP4:17,SignalP5:17,DeepSig:17,Phobius:17,SignalP6:17	1	1
XPS79281.1	0.688	0.783	0.566	MoCDIP11	.	.	.	0	0	0	.	.	0	.	0	0.028	0.161	.	0.81	.	0.396	0.474	0.81	1	1	0	0	20754.7	204	-8	3.928	12	105	146	57	14	110	20	6	14	0.704	.	.	0	0	0	SignalP3NN:19,SignalP3HMM:19,SignalP4:19,SignalP5:19,DeepSig:19,Phobius:19,SignalP6:19	1	1
XPS76002.1	0.687	-0.909	3.257	.	.	.	.	0	0	0	PF07510	Domain:DUF1524	0	.	0	0.004	0.128	.	.	0.708	0.297	0.306	0.78	1	1	0	0	21880.8	206	2	7.664	4	88	135	68	18	117	33	18	15	0.517	LVPR:[LIJVAP]X[KRTPEI]R&LXXR:21-24,RR:[KR]R:133-134	RDLF:55-58,HWIT:60-63,KMWV:178-181	0	0	0	SignalP3NN:16,SignalP3HMM:16,SignalP4:16,SignalP5:16,DeepSig:16,Phobius:16,SignalP6:24	1	1
XPS75280.1	0.686	-0.845	3.305	.	.	.	.	0	0	0	.	.	0	.	0	0	0.085	.	.	0.602	0.152	0.351	0.68	1	1	0	0	30624.3	306	16	10.75	1	148	211	89	13	162	53	35	18	0.448	LLVR:LXXR:259-262,AMER:[LIJVAP]X[KRTPEI]R:276-279,ATTR:[LIJVAP]X[KRTPEI]R:298-301	KQFG:71-74,KAIP:139-142,KSFD:194-197,KEIS:282-285,RAMK:301-304	0	0	0	SignalP3NN:15,SignalP3HMM:18,SignalP4:18,SignalP5:18,DeepSig:18,Phobius:18,SignalP6:18	1	1
XPS74228.1	0.686	5.381	2.844	.	.	.	.	0	0	0	.	.	0	.	0	1	0.829	.	0.98	.	0.01	0.478	0.71	1	1	0	0	6541.72	59	7	8.615	7	25	36	20	9	35	9	9	0	1.333	LACR:LXXR:5-8,VYTR:[LIJVAP]X[KRTPEI]R:52-55	KNLC:29-32	0	0	0	SignalP3NN:28,SignalP3HMM:28,Phobius:33	1	1
XPS77098.1	0.682	-0.233	2.481	.	.	.	.	0	0	0	.	.	0	.	0	0	0.346	.	.	0.541	0.041	0.304	0.68	1	1	0	0	51356.5	472	-1	6.345	6	172	262	129	64	260	106	55	51	1.114	AMPR:[LIJVAP]X[KRTPEI]R:229-232,LDVR:LXXR:400-403	KEMP:17-20,KALK:40-43,KNID:85-88,HFLS:91-94,REFV:117-120,REIR:155-158,HGIQ:173-176,KKLL:181-184,KTFS:192-195,KGLP:205-208,KAYE:276-279,KEIC:281-284,RYLL:329-332,RVLD:398-401,RSIP:403-406,KEIG:415-418	0	0	0	SignalP3NN:16,SignalP3HMM:16,SignalP4:16,SignalP5:16,DeepSig:16,Phobius:16,SignalP6:16	1	1
XPS75845.1	0.682	-0.011	3.112	.	.	.	.	0	0	0	PF00194	Domain:Carb_anhydrase	0	.	0	0.023	0.414	.	.	0.859	0.157	0.538	0.41	1	1	0	0	30598.1	273	-6	5.441	3	87	141	69	46	149	52	26	26	0.917	LRGR:LXXR:30-33,LAFR:LXXR:168-171	KGWH:132-135,RWFV:234-237,RQIM:239-242,HRIN:269-272	0	0	0	SignalP3NN:18,SignalP3HMM:18,SignalP4:18,SignalP5:18,DeepSig:18,Phobius:18,SignalP6:18	1	1
XPS72478.1	0.682	0.913	3.291	MoCDIP8	.	.	.	0	0	0	.	.	0	.	0	0	0.046	.	.	0.634	0.385	0.372	0.82	1	1	0	0	47120.5	441	-7	5.069	6	171	273	120	47	231	87	42	45	0.908	LSAR:LXXR:164-167	HDMD:63-66,HPYR:86-89,KGFT:133-136,KVWY:250-253,RIFY:386-389	0	0	0	SignalP3NN:20,SignalP3HMM:20,SignalP4:20,SignalP5:20,DeepSig:20,Phobius:20,SignalP6:20	1	1
XPS79289.1	0.681	-1.68	2.832	.	.	.	.	0	0	0	.	.	0	.	0	0.001	0.028	.	.	0.7	0.988	0.71	0.17	1	1	0	0	30367.4	278	-8	4.717	0	84	152	94	22	172	78	35	43	0.34	KR:[KR]R:72-73,VGKR:[LIJVAP]X[KRTPEI]R:94-97,KR:[KR]R:96-97,VGKR:[LIJVAP]X[KRTPEI]R:119-122,KR:[KR]R:121-122,VGKR:[LIJVAP]X[KRTPEI]R:144-147,KR:[KR]R:146-147,VGKR:[LIJVAP]X[KRTPEI]R:169-172,KR:[KR]R:171-172,VGKR:[LIJVAP]X[KRTPEI]R:194-197,KR:[KR]R:196-197,VGKR:[LIJVAP]X[KRTPEI]R:221-224,KR:[KR]R:223-224,VGKR:[LIJVAP]X[KRTPEI]R:246-249,KR:[KR]R:248-249,VGKR:[LIJVAP]X[KRTPEI]R:271-274,KR:[KR]R:273-…	RPIG:88-91,RPIG:113-116,RPIG:138-141,RPIG:163-166,RPIG:188-191,RPIG:215-218,RPIG:240-243,RPIG:265-268	0	0	0	SignalP4:18,SignalP3NN:22,SignalP3HMM:22,SignalP5:22,DeepSig:22,SignalP6:22,Phobius:24	1	1
XPS77420.1	0.678	-1.701	3.307	.	.	.	.	0	0	0	.	.	0	.	0	0.004	0.05	.	.	0.874	0.117	0.287	0.77	1	1	0	0	28496.5	282	-8.5	4.35	0	115	201	65	25	172	41	17	24	0.412	VKPR:[LIJVAP]X[KRTPEI]R:81-84,ASKR:[LIJVAP]X[KRTPEI]R:102-105,KR:[KR]R:104-105,LKYR:LXXR:107-110	KALH:86-89,RDLK:105-108,RQLG:110-113	1	0	0	SignalP3NN:15,SignalP3HMM:15,SignalP4:15,SignalP5:15,DeepSig:15,SignalP6:15,Phobius:20	1	1
XPS70600.1	0.677	-0.068	3.098	.	.	.	.	0	0	0	PF01161	Domain:PBP	0	.	0	0.136	0.258	.	.	0.65	0.665	0.535	0.28	1	1	0	0	26483.9	242	-7	4.965	3	71	134	67	23	126	59	28	31	0.807	VTTR:[LIJVAP]X[KRTPEI]R:137-140	HPLQ:27-30,KHLQ:81-84,HWIA:129-132,RTFS:140-143,HRYV:181-184,RDWA:219-222	0	0	0	SignalP3NN:21,SignalP3HMM:21,SignalP4:21,SignalP5:21,DeepSig:21,Phobius:21,SignalP6:21	1	1
XPS73230.1	0.675	-1.812	-0.091	.	.	.	.	0	0	0	.	.	0	.	0	0.804	0.417	.	.	0.605	0.012	0.268	0.47	1	1	1	0	17505.9	164	11	11.518	0	62	93	52	9	84	36	24	12	0.725	AKKR:[LIJVAP]X[KRTPEI]R:85-88,KR:[KR]R:87-88,RR:[KR]R:97-98,ASRR:[LIJVAP]X[KRTPEI]R:99-102,RR:[KR]R:101-102,RR:[KR]R:119-120	RQWD:88-91,RRIT:101-104,HDLE:140-143,KALP:144-147,RTIT:154-157	1	1	0	SignalP3NN:17,SignalP3HMM:17,SignalP4:17,SignalP5:17,Phobius:17,SignalP6:17	1	1
XPS79296.1	0.672	-5.685	-1.293	.	.	.	.	0	0	0	PF01008	Family:IF-2B	0	.	0	0	0.094	.	.	0.716	0.142	0.415	0.21	0	0	0	0	41688.3	392	-6.5	5.575	2	139	220	145	33	218	102	51	51	0.823	AATR:[LIJVAP]X[KRTPEI]R:110-113,LRLR:LXXR:236-239,AAPR:[LIJVAP]X[KRTPEI]R:284-287,IEER:[LIJVAP]X[KRTPEI]R:302-305	RGYL:10-13,HIYS:29-32,HAIK:38-41,KIFI:76-79,RKIT:104-107,RSLH:187-190,HAFC:197-200,RPYN:204-207,KFLV:280-283	0	0	0	.	0	0
XPS80934.1	0.671	-2.267	3.034	.	.	.	.	0	0	0	PF07632	Family:DUF1593	0	.	0	0	0.01	.	.	0.911	0.13	0.431	0.41	1	1	0	0	52787.8	481	-14.5	4.945	2	159	284	148	64	261	109	52	57	0.837	RR:[KR]R:24-25,ATIR:[LIJVAP]X[KRTPEI]R:83-86,RR:[KR]R:257-258,KR:[KR]R:464-465,RR:[KR]R:473-474	RLLH:2-5,RVFV:36-39,RFLT:55-58,RAYA:188-191,HGMS:216-219,KPLD:304-307,RVYT:314-317,KAFQ:343-346,RAFT:383-386,HIIL:456-459,RDMG:465-468	0	0	0	SignalP3NN:17,SignalP3HMM:17,SignalP4:17,SignalP5:17,DeepSig:17,Phobius:17,SignalP6:17	1	1
XPS72471.1	0.665	0.203	-0.226	.	.	.	.	0	0	0	PF02015	Domain:Glyco_hydro_45	0	GH45	0	0.092	0.608	.	0.699	.	0.238	0.443	0.82	1	1	1	0	30463.5	286	-1	5.345	15	120	185	79	27	166	49	24	25	0.7	LTTR:[LIJVAP]X[KRTPEI]R&LXXR:32-35,KR:[KR]R:133-134,KR:[KR]R:220-221	RNFV:7-10,RFWD:35-38,KPID:64-67,KRMI:133-136,KTLA:240-243	0	0	0	SignalP3NN:22,SignalP3HMM:22,SignalP4:22,SignalP5:22,DeepSig:22,SignalP6:22,Phobius:24	1	1
XPS70032.1	0.664	-1.59	3.002	.	.	.	.	0	0	0	.	.	0	.	0	0.004	0.044	.	.	0.69	0.047	0.503	0.76	1	1	0	0	23352.6	229	-2	4.588	1	102	144	105	13	140	16	7	9	0.662	LTER:[LIJVAP]X[KRTPEI]R&LXXR:19-22,AAIR:[LIJVAP]X[KRTPEI]R:154-157	RQLV:22-25,KTIA:70-73	0	0	0	SignalP3NN:16,SignalP3HMM:16,SignalP4:16,SignalP5:16,DeepSig:16,Phobius:16,SignalP6:22	1	1
XPS78103.1	0.664	-1.188	1.35	MoCDIP11,MoCDIP2,BghBEC4,GoEC2	.	.	.	0	0	0	.	.	0	.	0	0.001	0.075	.	.	0.731	0.066	0.423	0.84	1	1	0	0	15615.6	164	-1	5.064	4	96	119	61	7	99	23	11	12	0.443	.	KSIF:4-7	0	0	0	SignalP3NN:20,SignalP3HMM:20,SignalP4:20,SignalP5:20,DeepSig:20,Phobius:20,SignalP6:20	1	1
XPS68206.1	0.664	0.601	3.17	.	.	.	.	0	0	0	PF01565,PF08031	Domain:FAD_binding_4,Domain:BBE	0	AA7,AA4,CBM18	0	0	0.052	.	0.534	.	0.018	0.296	0.86	1	1	0	0	60792.6	574	5	7.359	11	249	361	151	75	310	88	49	39	1.075	.	KLFL:2-5,RAFK:139-142,HSYA:176-179,KALS:230-233,RHWG:256-259,RTLP:389-392,KAYS:400-403,KSIT:433-436,KFIN:506-509,HKLY:541-544,KLLT:552-555	0	0	0	SignalP3NN:19,SignalP3HMM:19,SignalP4:19,SignalP5:19,DeepSig:19,Phobius:19,SignalP6:19	1	1
XPS69230.1	0.664	-1.025	2.352	.	.	.	.	0	0	0	PF00561	Domain:Abhydrolase_1	0	CE1	0	0.001	0.323	.	.	0.82	0.787	0.622	0.41	1	1	0	0	37169.6	330	5	7.845	3	95	169	102	46	188	61	35	26	1.226	RR:[KR]R:82-83,LGIR:[LIJVAP]X[KRTPEI]R&LXXR:126-129,LATR:[LIJVAP]X[KRTPEI]R&LXXR:142-145	RSIA:2-5,HAYP:28-31,KYFN:35-38,KTIV:62-65,KNFC:70-73,RRLS:82-85,HGYR:87-90,HILG:132-135,HSMG:136-139,HLIL:156-159,KALG:169-172,RPID:176-179,RNYQ:194-197,KSLL:256-259,KAWS:271-274	0	0	0	SignalP3NN:17,SignalP3HMM:17,SignalP4:17,SignalP5:17,DeepSig:17,Phobius:17,SignalP6:17	1	1
XPS81226.1	0.66	0.673	2.058	CfTom1	.	.	.	0	0	0	PF07745	Domain:Glyco_hydro_53	0	GH53,GH5	0	0	0.34	.	.	0.795	0.017	0.34	0.7	1	1	0	0	39316.7	356	2	7.792	2	113	189	104	45	203	65	34	31	1.244	LAKR:[LIJVAP]X[KRTPEI]R&LXXR:82-85,KR:[KR]R:84-85,VAKR:[LIJVAP]X[KRTPEI]R:302-305,KR:[KR]R:304-305	KTYK:37-40,RIWV:64-67,KIYL:92-95,KSLN:116-119,KIMI:195-198,KTYG:257-260,KRIA:304-307,KVME:345-348	0	0	0	SignalP3NN:17,SignalP3HMM:17,SignalP4:17,SignalP5:17,DeepSig:17,Phobius:17,SignalP6:17	1	1
XPS75915.1	0.659	-0.817	3.287	.	.	.	.	0	0	0	PF10282	Repeat:Lactonase	0	.	0	0	0.195	.	.	0.82	0.352	0.528	0.63	1	1	0	0	43618.3	399	7	8.894	3	135	221	117	42	214	74	42	32	1.096	IWKR:[LIJVAP]X[KRTPEI]R:364-367,KR:[KR]R:366-367	HCII:14-17,RILY:70-73,RGYV:124-127,RSYL:170-173,RNFL:182-185,RVFK:196-199,RHLY:233-236,KIYS:246-249,RGLE:257-260,RQLM:341-344,HQIN:356-359	0	0	0	SignalP3NN:21,SignalP3HMM:21,SignalP4:21,SignalP5:21,DeepSig:21,Phobius:21,SignalP6:21	1	1
XPS71709.1	0.657	-0.28	3.159	.	.	.	.	0	0	0	.	.	0	.	0	0.129	0.285	.	.	0.761	0.049	0.55	0.26	1	1	0	0	17336.8	157	-3.5	4.8	5	55	91	46	19	89	26	12	14	0.806	LQLR:LXXR:30-33,VDER:[LIJVAP]X[KRTPEI]R:116-119,LSFR:LXXR:120-123	RSWT:135-138	0	1	0	SignalP3NN:18,SignalP3HMM:18,SignalP4:18,Phobius:18,SignalP6:18,SignalP5:24,DeepSig:24	1	1
XPS80745.1	0.656	3.195	3.309	.	.	.	.	0	0	0	.	.	0	.	0	0.677	0.357	.	0.652	.	0.993	0.683	0.46	1	1	0	0	8295.42	77	-2	4.481	3	29	46	27	5	40	12	5	7	1	.	RFFP:2-5	0	0	0	SignalP3NN:19,SignalP3HMM:19,SignalP4:19,SignalP5:19,DeepSig:19,Phobius:19,SignalP6:19	1	1
XPS75252.1	0.656	3.735	3.311	PesCDA,VdPDA1,VnaChtBP	.	.	.	0	0	0	PF01522,PF00187	Family:Polysacc_deac_1,Domain:Chitin_bind_1	1	CE4,CBM18	0	0	0.218	.	0.739	.	0.321	0.696	0.95	1	1	0	0	53599.3	516	-1.5	6.257	28	236	351	119	51	286	86	45	41	0.723	VKIR:[LIJVAP]X[KRTPEI]R:35-38,PSPR:[LIJVAP]X[KRTPEI]R:40-43,LLVR:LXXR:57-60,ASTR:[LIJVAP]X[KRTPEI]R:119-122,VIKR:[LIJVAP]X[KRTPEI]R:195-198,KR:[KR]R:197-198,LQAR:LXXR:330-333	KLFG:27-30,HHLL:55-58,KRMY:197-200,HTWS:209-212,RNII:236-239,KNLG:262-265,HDIH:312-315,RGFK:333-336	0	0	0	SignalP3NN:18,SignalP3HMM:18,SignalP4:18,SignalP6:18,SignalP5:20,Phobius:20	1	1
XPS77160.1	0.654	-0.174	-1.211	.	.	.	.	0	0	0	.	.	0	.	0	0.28	0.664	0.681	.	.	0.981	0.448	0.72	0	0	0	0	32160.6	296	9	9.565	3	97	167	75	28	155	69	40	29	1.328	KR:[KR]R:2-3,AAKR:[LIJVAP]X[KRTPEI]R:67-70,KR:[KR]R:69-70,LVGR:LXXR:175-178	RDLI:3-6,RSFE:100-103,KSIP:154-157,KEMV:206-209,KAII:223-226,KSIS:238-241	0	0	0	.	0	0
XPS73804.1	0.653	-0.988	3.245	.	.	.	.	0	0	0	PF13449	Repeat:Phytase-like	0	.	0	0	0.12	.	.	0.694	0.012	0.278	0.74	1	1	0	0	55711.3	513	-1.5	5.905	2	173	290	136	55	272	108	54	54	1.178	LPDR:LXXR:94-97,RR:[KR]R:302-303,LKYR:LXXR:308-311	KTYT:38-41,KSWK:75-78,RGWN:97-100,HKFS:112-115,KGFP:163-166,KMIR:221-224,KYMY:281-284,RLLK:306-309,HYIS:342-345,KEYY:461-464	1	0	0	SignalP3NN:19,SignalP3HMM:19,SignalP4:19,SignalP5:19,DeepSig:19,Phobius:19,SignalP6:19	1	1
XPS80096.1	0.651	1.808	3.308	.	.	.	.	0	0	0	.	.	0	.	0	0.026	0.192	.	0.902	.	0.813	0.442	0.77	1	1	0	0	15071.9	152	-1	5.547	3	73	104	46	12	91	14	7	7	0.778	.	KNIT:36-39	0	0	0	SignalP4:16,SignalP3NN:18,SignalP5:18,DeepSig:18,SignalP6:18,SignalP3HMM:20,Phobius:20	1	1
XPS81432.1	0.65	-0.731	2.088	.	.	.	.	0	0	0	.	.	0	.	0	0.233	0.325	.	.	0.66	0.363	0.539	0.39	1	1	0	0	19410.3	180	-1	6.202	3	59	108	58	21	112	26	14	12	0.6	LPPR:[LIJVAP]X[KRTPEI]R&LXXR:84-87	RTLY:7-10	0	1	0	SignalP3NN:26,SignalP3HMM:26,SignalP4:26,SignalP5:26,DeepSig:26,SignalP6:26	1	1
XPS70211.1	0.65	2.393	3.308	MoCDIP4,ChNIS1,CoNIS1	.	.	.	0	0	0	PF03443	Family:AA9	1	AA9	0	0.013	0.304	.	.	0.551	0.145	0.622	0.72	1	1	0	0	25344.8	238	5	8.424	4	97	146	68	31	146	33	20	13	0.634	.	RQWP:50-53,KVMC:65-68,KALW:87-90,KKWF:119-122,KVLK:143-146,KTLA:156-159,HELL:167-170,KVWS:234-237	0	0	0	SignalP3NN:19,DeepSig:19,SignalP6:19,SignalP3HMM:21,SignalP4:21,SignalP5:21,Phobius:21	1	1
XPS81521.1	0.649	2.553	3.025	CoNIS1,MoNIS1,ChNIS1	.	.	.	0	0	0	PF19271	Domain:Nis1	1	.	0	0.003	0.042	.	0.689	.	0.351	0.602	0.75	1	1	0	0	16108	157	-3	4.464	0	71	105	54	13	89	19	8	11	0.732	.	.	0	0	0	SignalP3NN:18,SignalP3HMM:18,SignalP4:18,SignalP5:18,DeepSig:18,Phobius:18,SignalP6:18	1	1
XPS68231.1	0.646	0.831	3.123	.	.	.	.	0	0	0	PF01328	Family:Peroxidase_2	0	.	0	0.061	0.451	.	.	0.621	0.222	0.766	0.56	1	1	0	0	32361.8	306	0.5	6.644	1	101	180	98	31	188	51	27	24	0.856	LGWR:LXXR:239-242	KSLG:35-38,HNFI:71-74,KGLA:88-91,HNFP:128-131,RSLF:227-230,KILA:273-276	0	0	0	SignalP3NN:16,SignalP3HMM:16,SignalP5:16,SignalP6:16,Phobius:25	1	1
XPS74752.1	0.646	0.209	2.634	.	.	.	.	0	0	0	.	.	0	.	0	0	0.058	.	0.756	.	0.036	0.527	0.94	1	1	0	0	25841	264	-3	4.382	15	143	199	94	13	167	17	7	10	0.394	LLKR:[LIJVAP]X[KRTPEI]R&LXXR:50-53,KR:[KR]R:52-53,AYTR:[LIJVAP]X[KRTPEI]R:167-170,APTR:[LIJVAP]X[KRTPEI]R:241-244	.	0	0	0	SignalP4:16,SignalP3NN:22,SignalP3HMM:22,SignalP5:22,DeepSig:22,Phobius:22,SignalP6:22	1	1
XPS79818.1	0.646	-1.406	3.162	.	.	.	.	0	0	0	PF04616	Family:Glyco_hydro_43	0	GH43_24,GH43,GH43_37,GH43_25,GH43_19,GH43_34,GH43_3,GH43_10,GH43_33,GH43_17,GH43_31,GH43_11,GH43_29,GH43_32,GH43_30,GH43_2,GH43_12,GH43_18,GH43_22,GH43_9,GH117	0	0	0.081	.	.	0.752	0.035	0.507	0.34	1	1	0	0	54343.7	486	-5	5.653	1	151	254	126	70	261	116	58	58	1.186	RR:[KR]R:180-181,LNTR:[LIJVAP]X[KRTPEI]R&LXXR:258-261,RR:[KR]R:416-417,LYQR:LXXR:433-436	KWIV:20-23,KFFL:51-54,HPYI:93-96,HIIQ:100-103,HMFW:117-120,RAYA:170-173,HRWD:203-206,KSYF:220-223,RTYN:261-264,RYIW:297-300,KSLE:310-313,KWYD:315-318,RAIK:330-333,KTYY:335-338,HEMI:358-361,RRIA:416-419,KGII:440-443	1	0	0	SignalP3NN:19,SignalP3HMM:19,SignalP4:19,SignalP5:19,DeepSig:19,Phobius:19,SignalP6:19	1	1
XPS72720.1	0.645	-0.179	3.061	.	.	.	.	0	0	0	PF00246	Domain:Peptidase_M14	0	.	0	0	0.265	.	.	0.612	0.323	0.39	0.29	1	1	0	0	54547.1	488	2	6.784	1	143	258	126	70	258	120	64	56	1.286	KR:[KR]R:72-73,LNKR:[LIJVAP]X[KRTPEI]R&LXXR:88-91,KR:[KR]R:90-91,VVPR:[LIJVAP]X[KRTPEI]R:109-112,ARER:[LIJVAP]X[KRTPEI]R:190-193,PETR:[LIJVAP]X[KRTPEI]R:317-320,PKIR:[LIJVAP]X[KRTPEI]R:330-333,KR:[KR]R:371-372	HDLL:17-20,HKLH:57-60,HHYK:69-72,RSLD:73-76,RGLG:112-115,KGLE:141-144,KEYG:145-148,KTFE:157-160,KQYI:179-182,KGLT:214-217,KTYT:221-224,KALG:230-233,RNFD:280-283,KTFD:290-293,RNMK:320-323,RWFI:333-336,REYI:381-384,RSYD:409-412,RWYG:433-436,KKLN:438-441,HGYT:444-447	0	0	0	SignalP3NN:16,SignalP3HMM:16,SignalP4:16,SignalP5:16,DeepSig:16,Phobius:16,SignalP6:16	1	1
XPS75291.1	0.645	-3.812	-1.301	.	.	.	.	0	0	0	PF13561	Domain:adh_short_C2	0	.	0	0.088	0.474	.	.	0.76	0.153	0.435	0.24	0	0	0	0	33205.9	314	7	9.01	4	117	178	103	27	187	71	40	31	0.685	LHKR:[LIJVAP]X[KRTPEI]R&LXXR:89-92,KR:[KR]R:91-92,VHTR:[LIJVAP]X[KRTPEI]R:103-106,LAMR:LXXR:173-176,PLRR:[LIJVAP]X[KRTPEI]R:266-269,RR:[KR]R:268-269	KELS:15-18,RSIA:34-37,KVII:48-51,HQFA:67-70,RALY:75-78,RELA:92-95,RQFD:106-109,KVFW:143-146,KVMR:155-158,KPYP:182-185,KKIG:259-262	0	0	1	.	0	0
XPS78788.1	0.644	-2.23	2.751	.	.	.	.	0	0	0	PF05694	Repeat:SBP56	0	.	0	0	0.043	.	.	0.841	0.033	0.418	0.79	1	1	0	0	50434.1	465	-7	5.09	0	138	265	144	53	266	91	44	47	1.144	LSSR:LXXR:261-264,LGPR:[LIJVAP]X[KRTPEI]R&LXXR:325-328,KR:[KR]R:368-369	KKIG:65-68,KDFL:80-83,HHLG:110-113,KTLV:119-122,RALL:154-157,HEWP:199-202,HGLS:219-222,KNII:227-230,RLWE:257-260,RKII:264-267,KFIP:282-285,KRLD:368-371,HYLK:383-386,KNLL:392-395,RSIN:432-435,KPYY:461-464	0	0	0	Phobius:17,SignalP3NN:19,SignalP3HMM:19,SignalP4:19,SignalP5:19,DeepSig:19,SignalP6:19	1	1
XPS72334.1	0.642	1.801	3.214	.	.	.	.	0	0	0	PF03928	Family:HbpS-like	0	.	0	0.26	0.195	.	0.677	.	0.568	0.426	0.63	1	1	0	0	17273.7	173	0	6.198	0	77	114	71	10	113	16	8	8	0.586	.	KLIG:139-142	0	0	0	SignalP3NN:18,SignalP3HMM:18,SignalP4:18,SignalP5:18,DeepSig:18,Phobius:18,SignalP6:18	1	1
XPS77994.1	0.636	0.015	2.228	BghBEC4,MoCDIP11	.	.	.	0	0	0	PF00127	Domain:Copper-bind	0	.	0	0.001	0.008	.	.	0.54	0.98	0.441	0.85	1	1	0	0	22384.5	225	-8	4.243	3	111	163	76	20	134	28	11	17	0.442	.	RSIA:3-6,RKFV:81-84,HSYV:204-207	0	0	0	DeepSig:15,SignalP3NN:19,SignalP3HMM:19,SignalP4:19,SignalP5:19,Phobius:19,SignalP6:19	1	1
XPS71808.1	0.634	1.161	3.005	.	.	.	.	0	0	0	.	.	0	.	0	0.913	0.392	.	.	0.67	0.288	0.405	0.49	1	1	0	0	15870.1	149	-2.5	5.476	2	54	90	54	11	80	30	15	15	0.581	.	RIIG:37-40	0	0	0	SignalP3NN:19,SignalP4:19,SignalP5:19,DeepSig:19,SignalP3HMM:26,Phobius:28,SignalP6:28	1	1
XPS74746.1	0.631	-2.292	0.777	BghBEC4,MoCDIP11,GoEC2,MoCDIP2,BghBEC2	.	.	.	0	0	0	PF05730	Domain:CFEM	1	.	0	0	0.036	.	.	0.864	0.055	0.428	0.81	1	1	0	0	19180.3	202	-6	4.178	8	127	152	85	7	113	19	7	12	0.354	.	KTFA:2-5	0	0	0	SignalP3NN:18,SignalP3HMM:18,SignalP4:18,SignalP5:18,DeepSig:18,Phobius:18,SignalP6:18	1	1
XPS80436.1	0.63	-1.525	2.992	.	.	.	.	0	0	0	.	.	0	.	0	0	0.017	.	.	0.614	0.161	0.35	0.2	1	1	0	0	46012.3	414	-9	5.205	14	152	235	90	41	188	121	59	62	0.917	LRTR:[LIJVAP]X[KRTPEI]R&LXXR:88-91,LYSR:LXXR:112-115,LEPR:[LIJVAP]X[KRTPEI]R&LXXR:211-214,VSRR:[LIJVAP]X[KRTPEI]R:302-305,RR:[KR]R:304-305,KR:[KR]R:329-330,KR:[KR]R:356-357,PETR:[LIJVAP]X[KRTPEI]R:386-389,LTRR:[LIJVAP]X[KRTPEI]R&LXXR:407-410,RR:[KR]R:409-410	KALL:3-6,KAML:71-74,RCLV:125-128,HSID:131-134,RIIE:161-164,RMIK:197-200,HPWS:228-231,KSME:232-235,KKYP:256-259,RSWH:330-333,HPFV:340-343,HTLT:405-408	1	0	0	SignalP3NN:21,SignalP3HMM:21,SignalP4:21,SignalP5:21,DeepSig:21,Phobius:21,SignalP6:21	1	1
XPS76272.1	0.629	-1.279	3.239	.	.	.	.	0	0	0	PF04885	Family:Stig1	0	.	0	0	0.035	.	.	0.638	0.013	0.509	0.84	1	1	0	0	62047.3	604	-29	4.006	33	331	436	153	44	302	77	25	52	0.567	LARR:[LIJVAP]X[KRTPEI]R&LXXR:116-119,RR:[KR]R:118-119,RR:[KR]R:592-593	RSLI:4-7,KAYC:39-42,RGLE:119-122,RDLQ:472-475,KGIC:571-574,KMFR:589-592,KTWD:594-597	0	0	0	SignalP3NN:17,SignalP4:17,SignalP5:17,DeepSig:17,SignalP6:17,SignalP3HMM:19,Phobius:19	1	1
XPS78248.1	0.623	-0.971	2.928	.	.	.	.	0	0	0	PF07470	Repeat:Glyco_hydro_88	0	GH105	0	0	0.21	.	.	0.756	0.201	0.438	0.57	1	1	0	0	41161.5	381	5	8.392	4	147	220	126	43	221	61	34	27	0.866	LEWR:LXXR:58-61,KR:[KR]R:90-91,AATR:[LIJVAP]X[KRTPEI]R:131-134,VATR:[LIJVAP]X[KRTPEI]R:177-180,PETR:[LIJVAP]X[KRTPEI]R:270-273,RR:[KR]R:323-324	RNIE:25-28,KRYI:90-93,HRYD:153-156,RNFL:196-199,RHIA:208-211,RVLA:233-236,KHWP:239-242,KEIV:259-262,RNYI:278-281	0	0	0	SignalP3NN:19,SignalP3HMM:19,SignalP4:19,SignalP5:19,DeepSig:19,Phobius:19,SignalP6:19	1	1
XPS81801.1	0.622	-2.402	3.043	.	.	.	.	0	0	0	PF01532	Repeat:Glyco_hydro_47	0	GH47	0	0	0.009	.	.	0.965	0.11	0.336	0.16	1	1	0	0	117882	1062	4.5	6.666	12	326	556	306	140	592	262	145	117	0.738	PLTR:[LIJVAP]X[KRTPEI]R:67-70,KR:[KR]R:162-163,LPIR:[LIJVAP]X[KRTPEI]R&LXXR:197-200,LANR:LXXR:234-237,PYPR:[LIJVAP]X[KRTPEI]R:249-252,RR:[KR]R:328-329,KR:[KR]R:401-402,LWTR:[LIJVAP]X[KRTPEI]R&LXXR:460-463,IKRR:[LIJVAP]X[KRTPEI]R:518-521,KR:[KR]R:519-520,LSDR:LXXR:539-542,IPKR:[LIJVAP]X[KRTPEI]R:583-586,KR:[KR]R:585-586,LAMR:LXXR:693-696,VAKR:[LIJVAP]X[KRTPEI]R:931-934,KR:[KR]R:933-934,VIPR:[LIJVA…	RPLP:8-11,RDIF:40-43,HGFD:45-48,HAFP:53-56,RPLT:61-64,KALD:134-137,HALV:144-147,HHYG:148-151,RGFD:165-168,HQFA:190-193,RGYD:200-203,HGIF:213-216,RLLP:237-240,HILL:368-371,RQIY:402-405,RAFW:426-429,HLLY:454-457,HGLR:480-483,RDIK:516-519,RCWT:521-524,KYLF:553-556,HPLN:563-566,HPLV:579-582,KRLR:585-588,HLMP:639-642,RIYA:749-752,KVFM:763-766,HTLD:788-791,KIYV:914-917,KRYQ:933-936,RNIP:952-955,HPIP:10…	1	0	0	SignalP3NN:26,SignalP3HMM:26,SignalP4:26,SignalP5:26,DeepSig:26,Phobius:26,SignalP6:26	1	1
XPS76796.1	0.621	-0.547	3.169	.	.	.	.	0	0	0	PF00264	Domain:Tyrosinase	0	.	0	0	0.191	.	.	0.629	0.008	0.406	0.79	1	1	0	0	46527.3	423	1	6.672	10	149	249	105	57	237	73	39	34	0.98	LDKR:[LIJVAP]X[KRTPEI]R&LXXR:31-34,KR:[KR]R:33-34,IVRR:[LIJVAP]X[KRTPEI]R:81-84,RR:[KR]R:83-84,KR:[KR]R:277-278,PSER:[LIJVAP]X[KRTPEI]R:368-371	KILQ:45-48,REWS:84-87,KDYI:95-98,HRFF:147-150,KTLR:156-159,KGYQ:165-168,KNWA:234-237,RCLK:274-277,RDIS:278-281,KLLN:296-299,KDMK:301-304,RVWW:358-361,KAIY:373-376	0	0	0	SignalP3NN:18,SignalP3HMM:18,SignalP4:18,SignalP5:18,DeepSig:25,Phobius:25,SignalP6:34	1	1
XPS73056.1	0.621	-2.201	3.056	.	.	.	.	0	0	0	PF01822	Domain:WSC	0	.	0	0	0.009	.	.	0.957	0.951	0.4	0.8	1	1	0	0	277327	2814	-223	3.318	28	1013	2092	896	102	1942	328	54	274	0.354	PLTR:[LIJVAP]X[KRTPEI]R:1175-1178,LVDR:LXXR:1441-1444,VFRR:[LIJVAP]X[KRTPEI]R:2460-2463,RR:[KR]R:2462-2463,LPKR:[LIJVAP]X[KRTPEI]R&LXXR:2473-2476,KR:[KR]R:2475-2476,RR:[KR]R:2578-2579,PDER:[LIJVAP]X[KRTPEI]R:2699-2702,VPRR:[LIJVAP]X[KRTPEI]R:2775-2778,RR:[KR]R:2777-2778,RR:[KR]R:2779-2780,ISTR:[LIJVAP]X[KRTPEI]R:2807-2810	RVYR:3-6,HVLS:7-10,RLFD:1430-1433,KALN:2351-2354,RGWQ:2368-2371,KCIT:2437-2440,RRIV:2462-2465,RQFS:2638-2641,KCFS:2654-2657,RPLI:2733-2736,RSIL:2751-2754,KVLL:2758-2761,HALL:2768-2771,RALS:2797-2800	1	0	0	SignalP3NN:20,SignalP4:20,DeepSig:20,SignalP5:22,Phobius:22,SignalP6:22	1	0
XPS77507.1	0.62	3.552	1.215	.	.	.	.	0	0	0	.	.	0	.	0	0.995	0.773	0.764	.	.	0.975	0.525	0.32	1	1	0	0	11418.8	104	2.5	7.707	4	38	61	26	9	49	24	14	10	0.684	VHTR:[LIJVAP]X[KRTPEI]R:38-41,VMER:[LIJVAP]X[KRTPEI]R:82-85	RLYQ:6-9,RAWC:61-64,RAMQ:70-73,RVME:81-84	0	0	0	SignalP3NN:23,SignalP3HMM:23,SignalP4:23,SignalP5:23,DeepSig:23,Phobius:23	1	1
XPS71994.1	0.62	1.228	3.121	.	.	.	.	0	0	0	.	.	0	.	0	0.54	0.505	.	.	0.814	0.882	0.359	0.3	1	1	0	0	22091.3	201	-2	5.603	4	65	108	57	19	115	38	19	19	0.714	LGTR:[LIJVAP]X[KRTPEI]R&LXXR:112-115,RR:[KR]R:115-116	HMMT:41-44,KEYK:107-110,RRLE:115-118,RLFE:130-133,KELL:179-182	0	0	0	SignalP3NN:18,SignalP3HMM:18,SignalP4:18,SignalP5:18,DeepSig:18,Phobius:18,SignalP6:18	1	1
XPS70860.1	0.62	2.411	2.608	CfTom1	.	.	.	0	0	0	PF11790	Family:Glyco_hydro_cc	0	GH128,GH5	0	0.082	0.573	.	.	0.855	0.47	0.359	0.67	1	1	0	0	29843.7	273	0	6.483	5	99	153	74	40	156	51	27	24	1.074	PTKR:[LIJVAP]X[KRTPEI]R:22-25,KR:[KR]R:24-25,AGKR:[LIJVAP]X[KRTPEI]R:28-31,KR:[KR]R:30-31	RGLA:31-34,KNYD:52-55,KNYK:101-104,HVLS:107-110,KKFI:134-137,KGIN:159-162,KSFM:165-168,HYYA:182-185,KAYM:193-196,KTFN:201-204,KEIL:224-227,KFLL:254-257	0	0	0	SignalP3NN:20,SignalP3HMM:20,SignalP4:20,SignalP5:20,DeepSig:20,Phobius:20,SignalP6:25	1	1
XPS81721.1	0.618	-0.414	3.033	.	.	.	.	0	0	0	.	.	0	GH93,GH33	0	0	0.256	.	.	0.651	0.002	0.466	0.73	1	1	0	0	43108.7	388	9.5	9.357	1	122	215	90	52	208	75	44	31	1.179	LYAR:LXXR:48-51,PWIR:[LIJVAP]X[KRTPEI]R:334-337	RTLY:46-49,KVYF:77-80,KEIS:93-96,RVYN:97-100,KKFA:119-122,KLIC:189-192,KNWG:216-219,KYLM:246-249,HQLI:284-287,RGLG:326-329,RHLR:348-351,KKLL:357-360	0	0	0	SignalP3NN:18,SignalP3HMM:18,SignalP4:18,SignalP5:18,DeepSig:18,Phobius:18,SignalP6:18	1	1
XPS78315.1	0.615	-1.358	3.235	.	.	.	.	0	0	0	PF04389	Family:Peptidase_M28	0	.	0	0	0.117	.	.	0.841	0.121	0.617	0.36	1	1	0	0	52097.5	479	-4.5	5.653	2	160	287	144	48	259	104	52	52	0.893	VHER:[LIJVAP]X[KRTPEI]R:20-23,LSTR:[LIJVAP]X[KRTPEI]R&LXXR:200-203,AARR:[LIJVAP]X[KRTPEI]R:278-281,RR:[KR]R:280-281,PAIR:[LIJVAP]X[KRTPEI]R:336-339	RDLP:23-26,KAML:63-66,HTLS:88-91,RGIG:98-101,RDWI:104-107,RKYA:112-115,KVYI:158-161,RILS:198-201,RAFA:263-266,RRLQ:280-283,RELA:293-296,RFLR:320-323,RNLT:396-399,KSYE:422-425,HMLD:438-441	0	0	0	SignalP3NN:17,SignalP3HMM:17,SignalP4:17,SignalP5:17,DeepSig:17,Phobius:17,SignalP6:23	1	1
XPS80911.1	0.615	-2.115	2.894	.	.	.	.	0	0	0	PF01565,PF08031	Domain:FAD_binding_4,Domain:BBE	0	AA7	0	0	0.033	.	.	0.901	0.89	0.308	0.57	1	1	0	0	53423.3	500	3.5	6.971	3	187	292	152	61	284	96	53	43	0.772	RR:[KR]R:151-152,LSLR:LXXR:272-275,LGGR:LXXR:342-345	HGLL:9-12,HSFQ:99-102,KYLW:144-147,RHFP:152-155,RFLK:178-181,KTFE:228-231,KVFS:296-299,KTLR:303-306,HPLN:358-361,RTYL:377-380,RDIA:394-397,KNLW:407-410,KPFE:436-439,RSFV:449-452,HRLY:466-469	0	0	0	SignalP3NN:24,SignalP3HMM:24,SignalP4:24,SignalP5:24,DeepSig:24,Phobius:24,SignalP6:24	1	1
XPS76510.1	0.615	-5.926	-1.299	.	.	.	.	0	0	0	PF01071,PF02844,PF02843	Domain:GARS_A,Domain:GARS_N,Domain:GARS_C	0	.	0	0	0.1	.	.	0.865	0.677	0.218	0.27	0	0	0	0	45748.2	430	-5.5	5.445	3	149	245	140	39	249	99	49	50	0.784	KR:[KR]R:121-122,KR:[KR]R:224-225,APTR:[LIJVAP]X[KRTPEI]R:242-245,RR:[KR]R:420-421	RVLL:6-9,HAIA:17-20,KLLQ:22-25,HIYV:31-34,KAFG:98-101,KTFS:113-116,KDFM:117-120,HRIP:123-126,KDIM:177-180,KEFG:183-186,HTIK:212-215,KRIF:224-227,KVLE:290-293,RVIA:387-390,KAYK:404-407,RDIA:421-424,RALR:426-429	1	0	0	.	0	0
XPS73340.1	0.615	-1.946	3.164	.	.	.	.	0	0	0	PF00732,PF05199	Domain:GMC_oxred_N,Domain:GMC_oxred_C	0	AA3_2,AA3,AA3_3,AA3_1	0	0	0.03	.	.	0.938	0.925	0.626	0.5	1	1	0	0	64833.5	600	5	7.19	1	199	340	198	61	335	122	67	55	0.95	LISR:LXXR:180-183,LAVR:LXXR:242-245,LDTR:[LIJVAP]X[KRTPEI]R&LXXR:246-249,IAER:[LIJVAP]X[KRTPEI]R:587-590	RFWT:2-5,RTFA:105-108,KVLG:113-116,KGWN:143-146,RIFP:183-186,RSYA:228-231,KKLG:302-305,KSLP:310-313,RTLV:386-389,KSYL:404-407,KGYP:430-433,HPLS:453-456,RNIT:465-468,HPYD:480-483,KFLR:492-495,RKYA:524-527,HPIG:536-539,KVYG:557-560,KGLR:562-565	0	0	0	SignalP3NN:19,SignalP3HMM:19,SignalP4:19,SignalP5:19,DeepSig:19,Phobius:19,SignalP6:19	1	1
XPS68830.1	0.615	-1.994	3.259	.	.	.	.	0	0	0	PF00732,PF05199	Domain:GMC_oxred_N,Domain:GMC_oxred_C	0	AA3_2,AA3,AA3_3,AA3_1	0	0	0.011	.	.	0.898	0.185	0.414	0.61	1	1	0	0	66800.2	626	0.5	6.571	2	231	369	206	63	348	127	67	60	0.847	LVSR:LXXR:31-34,LGGR:LXXR:109-112,KR:[KR]R:244-245,AVKR:[LIJVAP]X[KRTPEI]R:256-259,KR:[KR]R:258-259,KR:[KR]R:303-304,KR:[KR]R:387-388,KR:[KR]R:566-567,IAER:[LIJVAP]X[KRTPEI]R:608-611,KR:[KR]R:621-622	HPLF:24-27,KSLL:155-158,KEYN:176-179,HGYK:187-190,KNLV:206-209,KSLN:213-216,HNMD:236-239,HLIT:263-266,RVLT:272-275,HVFL:351-354,HTLA:416-419,HPYS:474-477,RKLV:516-519,KVYG:578-581,HTMT:600-603	0	0	0	SignalP3NN:23,SignalP3HMM:23,SignalP4:23,SignalP5:23,DeepSig:23,Phobius:23,SignalP6:23	1	1
XPS74891.1	0.615	-1.992	2.995	.	.	.	.	0	0	0	PF00491	Domain:Arginase	0	.	0	0	0.054	.	.	0.94	0.964	0.371	0.19	1	1	0	0	43424.5	402	-8	5.377	2	146	226	124	46	220	97	48	49	0.728	PHTR:[LIJVAP]X[KRTPEI]R:56-59,LALR:LXXR:137-140,LAAR:LXXR:149-152,LRTR:[LIJVAP]X[KRTPEI]R&LXXR:254-257	RCLT:59-62,KAYD:66-69,RAIR:92-95,RGYN:105-108,RQMS:140-143,KVIT:170-173,RALN:186-189,KAYG:190-193,HPIT:194-197,KGII:288-291,RELI:332-335,RILR:336-339,KGLT:383-386	0	1	0	SignalP6:17,SignalP3NN:19,SignalP3HMM:19,SignalP4:19,SignalP5:19,Phobius:19	1	1
XPS79388.1	0.615	-1.881	3.167	.	.	.	.	0	0	0	PF14683,PF14686	Domain:CBM-like,Domain:fn3_3	0	PL4_5,PL4,PL4_4,PL4_2	0	0	0.034	.	.	0.848	0.011	0.488	0.65	1	1	0	0	62065.3	561	13	9.402	0	193	319	155	84	299	115	67	48	1.153	VRER:[LIJVAP]X[KRTPEI]R:183-186,AHER:[LIJVAP]X[KRTPEI]R:274-277,PKKR:[LIJVAP]X[KRTPEI]R:394-397,KR:[KR]R:396-397,KR:[KR]R:398-399	KALP:118-121,RTLW:127-130,HGFN:139-142,RDFV:186-189,KIWG:252-255,RFLN:283-286,RPLV:323-326,RDLG:384-387,KRIF:398-401,HGLT:421-424,KALL:467-470,RFLQ:518-521	1	0	0	SignalP3NN:18,SignalP3HMM:18,SignalP4:18,SignalP5:18,DeepSig:18,Phobius:18,SignalP6:18	1	1
XPS79492.1	0.615	-1.38	3.147	.	.	.	.	0	0	0	.	.	0	.	0	0	0.03	.	.	0.704	0.918	0.65	0.33	1	1	0	0	67033.7	620	-25	4.57	5	201	349	173	61	341	157	69	88	0.896	KR:[KR]R:44-45,VAKR:[LIJVAP]X[KRTPEI]R:66-69,KR:[KR]R:68-69,KR:[KR]R:92-93,KR:[KR]R:143-144,LARR:[LIJVAP]X[KRTPEI]R&LXXR:254-257,RR:[KR]R:256-257,AQRR:[LIJVAP]X[KRTPEI]R:611-614,RR:[KR]R:613-614	RSLL:6-9,KPIG:53-56,KAIS:77-80,REMP:93-96,KRMK:143-146,KPIV:155-158,HFIL:184-187,KPWD:224-227,HEYV:239-242,KAMD:262-265,HTFS:268-271,KNFL:309-312,KELQ:343-346,RAWN:438-441,KDLF:515-518	0	0	0	SignalP3NN:23,SignalP4:23,SignalP5:23,DeepSig:23,Phobius:23,SignalP6:23	1	0
XPS78384.1	0.614	4.45	1.284	.	.	.	.	0	0	0	.	.	0	.	0	1	0.925	.	0.888	.	0.984	0.514	0.61	0	0	0	0	8635.17	77	3	7.514	9	26	46	19	12	51	17	11	6	0.5	RR:[KR]R:18-19	RLLV:26-29	0	0	0	.	0	0
XPS69369.1	0.612	3.646	3.299	PpCBEL	.	.	.	0	0	0	PF14295	Domain:PAN_4	0	.	0	0.001	0.178	.	0.716	.	0.985	0.326	0.85	1	1	0	0	29213.3	278	-4	4.927	13	131	193	67	22	134	59	28	31	0.917	LAAR:LXXR:15-18,VAKR:[LIJVAP]X[KRTPEI]R:32-35,KR:[KR]R:34-35	RSLA:18-21,KDYA:65-68,HVWS:227-230,KLIT:232-235	0	0	0	SignalP3NN:21,SignalP3HMM:21,SignalP4:21,SignalP5:21,DeepSig:21,Phobius:21,SignalP6:21	1	1
XPS73043.1	0.61	-0.372	1.113	MoCDIP2,MoCDIP11	.	.	.	0	0	0	PF01083	Domain:Cutinase	1	CE5	0	0.001	0.191	.	.	0.605	0.86	0.278	0.85	1	1	0	0	35560.5	342	-5.5	5.128	10	150	219	107	34	193	62	30	32	0.68	AQER:[LIJVAP]X[KRTPEI]R:18-21	KPYH:45-48,KGIG:72-75,KAYS:114-117,KLIL:124-127,KWIV:251-254,KSIA:272-275	0	0	0	SignalP3NN:18,SignalP3HMM:18,SignalP4:18,SignalP5:18,DeepSig:18,Phobius:18,SignalP6:18	1	1
XPS78782.1	0.605	-1.431	2.919	.	.	.	.	0	0	0	.	.	0	.	0	0	0.056	.	.	0.615	0.039	0.296	0.76	1	1	0	0	40140.7	373	-12	4.622	2	139	225	104	56	211	67	30	37	0.909	LKGR:LXXR:103-106	RPYI:41-44,RAYT:46-49,RILT:120-123,HTFQ:136-139,KGYG:242-245,KYLA:247-250,KVLY:344-347,RIMQ:358-361,KEWD:364-367	0	0	0	SignalP3NN:15,SignalP4:15,SignalP5:15,SignalP6:15,SignalP3HMM:22,DeepSig:22,Phobius:24	1	1
XPS71391.1	0.605	1.089	3.309	MoCDIP4,ChNIS1,CoNIS1,MoNIS1	.	.	.	0	0	0	PF03443	Family:AA9	1	AA9	0	0	0.072	.	.	0.598	0.076	0.389	0.77	1	1	0	0	23858.9	233	6.5	9.24	2	112	157	79	25	140	27	18	9	0.547	LQAR:LXXR:21-24	RHYL:24-27,RCYE:61-64,KGLQ:210-213	0	1	0	SignalP3NN:18,SignalP3HMM:18,SignalP4:18,SignalP5:18,Phobius:18,SignalP6:18	1	1
XPS75672.1	0.605	-0.999	3.08	.	.	.	.	0	0	0	PF04952	Domain:AstE_AspA	0	.	0	0	0.134	.	.	0.66	0.005	0.311	0.76	1	1	0	0	41606.9	386	-9.5	4.736	4	122	231	122	34	219	72	33	39	0.86	LNQR:LXXR:131-134,LIDR:LXXR:258-261,RR:[KR]R:384-385	HDLN:35-38,RYYL:49-52,RIFE:102-105,RNYF:134-137,RVFP:150-153,KLLQ:215-218,KIWN:252-255,RVLV:268-271,RMFQ:343-346	0	0	0	SignalP3NN:20,SignalP3HMM:20,SignalP4:20,SignalP5:20,DeepSig:20,Phobius:20,SignalP6:20	1	1
XPS76113.1	0.601	-0.411	2.599	.	.	.	.	0	0	0	PF13472	Domain:Lipase_GDSL_2	0	.	0	0.001	0.419	.	.	0.85	0.592	0.233	0.23	1	1	0	0	38942.4	352	-5.5	5.553	6	115	189	106	40	182	82	41	41	1.083	KR:[KR]R:55-56,LHAR:LXXR:76-79,LPLR:LXXR:218-221,PLRR:[LIJVAP]X[KRTPEI]R:219-222,RR:[KR]R:221-222	RNIA:38-41,KSIE:145-148,KPYL:172-175,HGLI:179-182,RFFG:189-192,RTIE:207-210,RALN:222-225,RFID:247-250,KTLQ:317-320,RGFV:331-334	0	0	0	SignalP3NN:16,SignalP4:16,SignalP5:16,DeepSig:19	1	0
XPS75333.1	0.599	-2.101	2.957	.	.	.	.	0	0	0	.	.	0	.	0	0	0.009	.	.	0.803	0.021	0.381	0.82	1	1	0	0	43711.5	404	5	8.132	7	174	259	107	39	200	73	40	33	0.824	RR:[KR]R:264-265,KR:[KR]R:285-286,LERR:[LIJVAP]X[KRTPEI]R&LXXR:293-296,RR:[KR]R:295-296	RYFS:5-8,HWIL:108-111,RDLY:129-132,KTIT:188-191,RIMT:201-204,RVFV:212-215,KTIT:371-374	1	0	0	SignalP3NN:21,SignalP3HMM:21,SignalP4:21,SignalP5:21,DeepSig:21,Phobius:21,SignalP6:21	1	1
XPS73665.1	0.599	3.658	3.312	PesCDA,VdPDA1,VnaChtBP	.	.	.	0	0	0	PF01522	Family:Polysacc_deac_1	1	CE4,CBM18	0	0	0.218	.	0.703	.	0.021	0.609	0.98	1	1	0	0	62337.8	608	9	7.443	36	318	426	138	59	321	102	59	43	0.75	LKSR:LXXR:35-38,LEAR:LXXR:44-47,LNAR:LXXR:61-64,VIKR:[LIJVAP]X[KRTPEI]R:197-200,KR:[KR]R:199-200	RDLK:33-36,RDLL:38-41,KDYT:157-160,HVLD:162-165,KTYN:168-171,KRMD:199-202,HQIA:206-209,HTWT:211-214,RNIV:238-241,KDMA:263-266,KNYF:294-297,HDIH:318-321	0	0	0	SignalP3NN:18,SignalP3HMM:18,SignalP4:18,Phobius:18,SignalP6:18,SignalP5:20	1	1
XPS73006.1	0.598	0.369	3.129	.	.	.	.	0	0	0	PF00264	Domain:Tyrosinase	0	.	0	0	0.422	.	.	0.756	0.602	0.666	0.66	1	1	0	0	43116.4	388	3.5	7.031	8	127	215	100	59	216	81	45	36	1.182	RR:[KR]R:58-59	REWS:59-62,KCIH:77-80,HRWY:122-125,HNWA:146-149,RNYT:178-181,HNIP:222-225,RCLS:238-241,RDLT:242-245,KDIH:265-268,RVWW:319-322	0	0	0	SignalP3NN:17,SignalP3HMM:17,SignalP4:17,SignalP5:17,DeepSig:17,Phobius:17,SignalP6:28	1	1
XPS67850.1	0.597	-0.607	2.212	.	.	.	.	0	0	0	PF00246	Domain:Peptidase_M14	0	.	0	0	0.306	.	.	0.531	0.394	0.298	0.31	1	1	0	0	48533	433	-1	6.372	2	136	220	117	63	226	107	56	51	1.118	LKYR:LXXR:80-83,KR:[KR]R:104-105,LTYR:LXXR:274-277,RR:[KR]R:351-352	KAFV:2-5,RSLL:7-10,KKLS:46-49,RTLH:83-86,KDLG:87-90,KAYR:100-103,RDID:105-108,RSYE:144-147,RTIQ:149-152,HLYG:155-158,REWI:176-179,HIFP:212-215,RLWR:230-233,RNWE:254-257,RKLR:295-298,KLYI:304-307,HSYG:310-313,HLYA:374-377,KLLD:420-423	0	0	0	SignalP3NN:19,SignalP4:20,SignalP5:20,DeepSig:20,SignalP3HMM:23,SignalP6:23,Phobius:28	1	1
XPS78789.1	0.596	0.51	3.309	.	.	.	.	0	0	0	PF11327	Family:Egh16-like	1	.	0	0	0.048	.	.	0.782	0.083	0.496	0.76	1	1	0	0	31133.4	334	-3	4.878	6	189	257	130	11	225	36	17	19	0.223	ATPR:[LIJVAP]X[KRTPEI]R:45-48,AQRR:[LIJVAP]X[KRTPEI]R:309-312,RR:[KR]R:311-312	KCMI:122-125	0	0	0	SignalP4:22,SignalP5:22,DeepSig:22,SignalP6:22,SignalP3NN:24,SignalP3HMM:24,Phobius:24	1	1
XPS79013.1	0.593	-0.922	3.225	.	.	.	.	0	0	0	.	.	0	.	0	0.004	0.095	.	.	0.68	0.872	0.339	0.59	1	1	0	0	12190.9	110	-1.5	5.494	2	39	64	34	13	59	16	8	8	1.048	.	RAYD:45-48	0	0	0	SignalP3NN:15,SignalP3HMM:15,SignalP4:15,SignalP5:15,DeepSig:15,Phobius:15,SignalP6:15	1	1
XPS71347.1	0.592	1.043	2.672	.	.	.	.	0	0	0	PF00722	Domain:Glyco_hydro_16	0	GH16_1,GH16,GH16_3	0	0.001	0.223	.	0.691	.	0.047	0.239	0.61	1	1	0	0	34977.9	318	-13	4.42	10	112	187	81	44	173	66	28	38	1.397	.	KKFD:24-27,RTIG:64-67,KKMK:257-260,KTYH:314-317	0	0	0	SignalP3NN:19,SignalP3HMM:19,SignalP4:19,SignalP5:19,DeepSig:19,Phobius:19,SignalP6:19	1	1
XPS75108.1	0.592	0.657	3.041	PpCBEL	.	.	.	0	0	0	PF00024	Domain:PAN_1	0	.	0	0	0.009	.	.	0.598	0.833	0.431	0.82	1	1	0	0	38860.4	379	3.5	7.911	11	204	281	110	19	176	42	23	19	0.851	KR:[KR]R:147-148,LEER:[LIJVAP]X[KRTPEI]R&LXXR:159-162	KSLV:23-26,KVLT:45-48	0	0	0	SignalP3NN:18,SignalP3HMM:18,SignalP4:18,SignalP5:18,DeepSig:18,Phobius:18,SignalP6:18	1	1
XPS80831.1	0.592	1.013	3.037	MoCDIP1	.	.	.	0	0	0	PF00295	Repeat:Glyco_hydro_28	0	GH28	0	0	0.171	.	.	0.752	0.505	0.438	0.47	1	1	0	0	47628.7	437	-1.5	6.162	12	143	258	121	45	235	98	50	48	1.244	APTR:[LIJVAP]X[KRTPEI]R:23-26,LDLR:LXXR:90-93,KR:[KR]R:166-167,LKMR:LXXR:184-187	KAFP:38-41,RSIL:63-66,RFLK:93-96,HWLP:114-117,RTFQ:118-121,RPLL:167-170,HNLI:193-196,KNFA:216-219,KNLD:220-223,HGIS:267-270,KVWP:304-307,RFFN:333-336,KVIL:363-366,KDIW:372-375,RNMD:420-423	0	1	0	SignalP4:17,SignalP3HMM:19,SignalP5:19,DeepSig:19,Phobius:19,SignalP6:19,SignalP3NN:23	1	1
XPS71598.1	0.591	-1.2	3.312	.	.	.	.	0	0	0	.	.	0	.	0	0.005	0.076	.	.	0.792	0.916	0.539	0.58	1	1	0	0	10809.4	103	10	11.411	1	43	64	25	5	48	20	16	4	0.448	RR:[KR]R:67-68	RALH:45-48	1	0	0	SignalP3NN:19,SignalP3HMM:19,SignalP4:19,SignalP5:19,DeepSig:19,Phobius:19,SignalP6:19	1	1
XPS69979.1	0.589	-1.646	2.864	.	.	.	.	0	0	0	PF03403	Domain:PAF-AH_p_II	0	.	0	0	0.071	.	.	0.712	0.076	0.331	0.57	1	1	0	0	39933.3	369	-10	4.55	2	125	214	121	48	229	50	22	28	0.81	AIIR:[LIJVAP]X[KRTPEI]R:195-198,LGER:[LIJVAP]X[KRTPEI]R&LXXR:344-347	HAFN:32-35,KLWG:80-83,RKLF:198-201,HYFA:216-219,HSLG:222-225,KPFL:257-260,RYIN:361-364	0	0	0	SignalP3NN:15,SignalP3HMM:15,SignalP4:15,SignalP5:15,DeepSig:15,Phobius:15,SignalP6:15	1	1
XPS80425.1	0.588	2.292	3.309	.	.	.	.	0	0	0	.	.	0	.	0	0.256	0.252	0.751	.	.	0.953	0.467	0.05	1	1	0	0	16401.7	149	-6	4.722	1	46	67	45	16	87	42	19	23	0.561	LQKR:[LIJVAP]X[KRTPEI]R&LXXR:28-31,KR:[KR]R:30-31,IAER:[LIJVAP]X[KRTPEI]R:45-48,LELR:LXXR:134-137,RR:[KR]R:137-138	RSFL:2-5,REFD:41-44,KELE:132-135,KHWG:143-146	0	0	0	SignalP3NN:18,SignalP3HMM:18,SignalP4:18,SignalP5:18,DeepSig:18,Phobius:18,SignalP6:18	1	1
XPS69676.1	0.583	0.565	3.295	PpCBEL	.	.	.	0	0	0	PF07732,PF07731,PF00394	Domain:Cu-oxidase_3,Domain:Cu-oxidase_2,Domain:Cu-oxidase	0	AA1_3,AA1,AA1_1,AA1_2,CBM18	0	0	0.081	.	.	0.892	0.977	0.572	0.89	1	1	0	0	100275	938	-10.5	5.546	35	380	592	239	103	509	160	80	80	0.913	LSGR:LXXR:174-177,KR:[KR]R:378-379,VFRR:[LIJVAP]X[KRTPEI]R:386-389,RR:[KR]R:388-389,LTYR:LXXR:513-516,PPRR:[LIJVAP]X[KRTPEI]R:854-857,RR:[KR]R:856-857	RSFT:2-5,RELD:26-29,HSFP:374-377,HGIR:486-489,KSWD:551-554,RAMD:586-589,KTYL:622-625,RLIN:627-630,KFYI:638-641,HELE:644-647,RYMV:671-674,KGIV:705-708,KWYL:769-772,RVIA:788-791,HPIH:825-828,HDFL:832-835,KGFK:929-932	0	0	0	SignalP3NN:20,SignalP4:20,SignalP5:20,DeepSig:20,Phobius:20,SignalP6:20	1	0
XPS74185.1	0.581	-0.577	3.256	.	.	.	.	0	0	0	PF04616	Family:Glyco_hydro_43	0	GH43_26,GH43,GH43_27,GH43_34,GH43_32,GH43_31,GH43_33,GH43_17,GH43_30,GH43_9,GH43_3,GH43_11,GH43_10,GH43_22,GH43_12	0	0	0.213	.	.	0.721	0.019	0.504	0.59	1	1	0	0	41779.3	366	-9	4.802	6	110	206	73	62	196	71	33	38	1.15	ADPR:[LIJVAP]X[KRTPEI]R:111-114	KTLL:3-6,KVLT:67-70,KLLF:78-81,HTLN:99-102,HRMY:135-138,HIYS:179-182,RKYD:186-189,RQII:213-216,RNYC:265-268,HPYP:288-291,HGMQ:323-326,RTIR:335-338	0	0	0	SignalP5:15,DeepSig:15,SignalP6:15,SignalP3NN:16,SignalP3HMM:18,SignalP4:18,Phobius:18	1	1
XPS80992.1	0.58	-0.419	3.228	.	.	.	.	0	0	0	.	.	0	.	0	0.292	0.068	.	.	0.539	0.845	0.537	0.74	1	1	0	0	14992.7	160	-2.5	4.654	1	91	114	53	7	104	22	10	12	0.303	LSDR:LXXR:31-34,LFLR:LXXR:37-40,LHKR:[LIJVAP]X[KRTPEI]R&LXXR:56-59,KR:[KR]R:58-59,LESR:LXXR:66-69	RALD:40-43	0	0	0	SignalP3NN:18,SignalP4:18,SignalP5:18,DeepSig:18,SignalP6:18,SignalP3HMM:25,Phobius:25	1	1
XPS72769.1	0.576	1.738	3.185	.	.	.	.	0	0	0	PF08212	Domain:Lipocalin_2	0	.	0	0.003	0.222	.	0.69	.	0.973	0.386	0.85	1	1	0	0	20918.3	198	-7	4.056	4	81	134	63	20	119	23	8	15	0.684	LMPR:[LIJVAP]X[KRTPEI]R&LXXR:18-21	RVLN:89-92	0	0	0	SignalP3NN:16,SignalP3HMM:16,SignalP5:16,DeepSig:16,Phobius:16,SignalP6:21	1	1
XPS71048.1	0.575	-1.815	3.129	.	.	.	.	0	0	0	PF00245	Domain:Alk_phosphatase	0	.	0	0	0.047	.	.	0.84	0.105	0.461	0.48	1	1	0	0	72336.4	658	-5	5.913	5	213	363	188	78	352	156	79	77	1.139	RR:[KR]R:24-25,LFAR:LXXR:108-111,AYRR:[LIJVAP]X[KRTPEI]R:125-128,RR:[KR]R:127-128,AEER:[LIJVAP]X[KRTPEI]R:159-162,LQAR:LXXR:423-426,KR:[KR]R:511-512,VYER:[LIJVAP]X[KRTPEI]R:518-521,PDRR:[LIJVAP]X[KRTPEI]R:558-561,RR:[KR]R:560-561	RRLG:24-27,KAYR:124-127,RDLA:156-159,KNII:165-168,RLIG:184-187,KSIN:189-192,HQMT:209-212,HSID:213-216,HRLT:264-267,KDYY:342-345,KDYQ:351-354,KALG:370-373,KWLD:382-385,KEMT:413-416,KAID:418-421,KGFV:430-433,KMMH:443-446,RALG:452-455,HGFD:490-493,HYLA:501-504,HSLT:610-613	1	0	0	SignalP3NN:20,SignalP3HMM:20,SignalP4:20,SignalP5:20,DeepSig:20,Phobius:20,SignalP6:20	1	1
XPS71017.1	0.575	-2.037	3.14	.	.	.	.	0	0	0	PF05199,PF00732	Domain:GMC_oxred_C,Domain:GMC_oxred_N	0	AA3_2,AA3,AA3_1	0	0	0.01	.	.	0.892	0.511	0.197	0.2	1	1	0	0	73328.8	675	-9	5.423	5	220	374	207	73	379	164	81	83	0.873	KR:[KR]R:33-34,LAAR:LXXR:62-65,LYPR:[LIJVAP]X[KRTPEI]R&LXXR:149-152,KR:[KR]R:294-295,LTGR:LXXR:348-351,ADPR:[LIJVAP]X[KRTPEI]R:356-359,RR:[KR]R:359-360,LQDR:LXXR:422-425,PEIR:[LIJVAP]X[KRTPEI]R:544-547,KR:[KR]R:548-549	KHLA:2-5,RYID:17-20,RAFD:34-37,KVLL:72-75,KHFD:110-113,KYIQ:176-179,RKYY:193-196,RYLP:203-206,HGFS:212-215,KVLS:233-236,RDIN:266-269,RKYH:315-318,KGLP:337-340,RSLY:351-354,KELP:413-416,RNFA:549-552,HVMT:591-594,KEFA:599-602,RGIE:634-637	0	0	0	SignalP3NN:16,SignalP3HMM:16,SignalP4:16,SignalP5:16,DeepSig:16,Phobius:16,SignalP6:16	1	1
XPS81240.1	0.569	-1.49	3.245	.	.	.	.	0	0	0	PF19501	Family:YetA	0	PL26	0	0	0.044	.	.	0.818	0.951	0.317	0.47	1	1	0	0	102851	935	-11.5	5.604	3	313	528	258	128	508	220	110	110	0.875	PWPR:[LIJVAP]X[KRTPEI]R:42-45,RR:[KR]R:109-110,LVLR:LXXR:163-166,LGVR:LXXR:260-263,RR:[KR]R:299-300,VTTR:[LIJVAP]X[KRTPEI]R:326-329,LKKR:[LIJVAP]X[KRTPEI]R&LXXR:351-354,KR:[KR]R:353-354,LGLR:LXXR:386-389,LDVR:LXXR:423-426,AYIR:[LIJVAP]X[KRTPEI]R:499-502,RR:[KR]R:544-545,LGTR:[LIJVAP]X[KRTPEI]R&LXXR:623-626,RR:[KR]R:680-681,RR:[KR]R:718-719,ANKR:[LIJVAP]X[KRTPEI]R:847-850,KR:[KR]R:849-850,LVPR:[LI…	KWLE:25-28,HAIG:81-84,RALV:204-207,RFYF:230-233,RIIH:241-244,RDFW:389-392,KKYP:393-396,RPYH:426-429,KQLD:439-442,KAIG:505-508,KFLI:531-534,RRWY:544-547,HTYD:557-560,HQWR:564-567,HFLR:589-592,KTFF:648-651,KAFL:672-675,KLIE:729-732,KTYP:735-738,KDFG:828-831,RVWS:858-861	0	0	0	SignalP3NN:17,SignalP4:17,SignalP5:17,DeepSig:17,Phobius:17,SignalP6:17	1	0
XPS71846.1	0.567	0.762	3.306	MoCDIP4,ChNIS1,CoNIS1	.	.	.	0	0	0	PF03443	Family:AA9	1	AA9,AA11	0	0	0.009	.	.	0.671	0.946	0.654	0.76	1	1	0	0	32518.1	323	-11	4.391	4	153	219	105	29	194	46	19	27	0.487	.	KAII:4-7,HQFW:22-25,HFLY:93-96,HEFK:137-140,KNIY:203-206	0	0	0	SignalP3NN:17,SignalP3HMM:17,SignalP4:17,SignalP5:17,DeepSig:17,Phobius:17,SignalP6:17	1	1
XPS68209.1	0.566	0.347	2.837	.	.	.	.	0	0	0	PF00190	Domain:Cupin_1	0	.	0	0	0.032	0.517	.	.	0.957	0.675	0.06	1	1	0	0	51588.8	456	-12.5	5.174	1	115	225	115	58	230	142	69	73	1.021	LPWR:LXXR:64-67,LGPR:[LIJVAP]X[KRTPEI]R&LXXR:75-78,IVPR:[LIJVAP]X[KRTPEI]R:370-373	HPLP:62-65,RELP:126-129,KELA:132-135,RELH:147-150,HSLQ:195-198,RAIP:248-251,KYIF:255-258,KEIP:268-271,HKML:286-289,REMH:328-331,RTFD:359-362,RNMG:373-376,HFIE:377-380,HLFA:419-422,KFIK:430-433	0	0	0	SignalP3NN:17,SignalP3HMM:17,SignalP4:17,SignalP5:17,DeepSig:17,Phobius:17,SignalP6:17	1	1
XPS75775.1	0.564	2.05	2.368	PgShr9,UvHrip1,MoHrip2	.	.	.	0	0	0	PF00314	Domain:Thaumatin	1	GH152	0	0.022	0.452	.	.	0.605	0.059	0.46	0.56	1	1	0	0	35481.6	323	-8	4.779	14	103	193	70	36	175	69	32	37	0.959	LERR:[LIJVAP]X[KRTPEI]R&LXXR:41-44,RR:[KR]R:43-44	HHMS:31-34,RKLE:39-42,RKLD:44-47,RVWG:97-100,HTYY:153-156,KHIL:314-317	0	0	0	SignalP3NN:29,SignalP3HMM:29,SignalP4:29,SignalP5:29,DeepSig:29,Phobius:29,SignalP6:29	1	1
XPS74590.1	0.563	-1.33	3.033	.	.	.	.	0	0	0	.	.	0	.	0	0.005	0.041	.	.	0.642	0.662	0.426	0.79	1	1	0	0	12276	123	-3.5	4.483	5	55	81	41	7	79	14	6	8	0.39	.	.	0	0	0	SignalP3NN:29,SignalP3HMM:29,SignalP4:29,SignalP5:29,SignalP6:29	1	1
XPS73619.1	0.559	0.936	3.152	MoCDIP11	.	.	.	0	0	0	PF02469	Domain:Fasciclin	0	.	0	0	0.027	.	.	0.574	0.918	0.479	0.82	1	1	0	0	39070.5	387	-18.5	3.862	0	171	263	141	24	217	38	11	27	0.693	.	HVLN:95-98,HVID:165-168,RFLV:169-172,RIFV:275-278,HVID:296-299	0	0	0	SignalP3NN:16,SignalP4:16,DeepSig:16,SignalP6:16,SignalP3HMM:20,SignalP5:20,Phobius:28	1	1
XPS68294.1	0.554	-1.51	3.153	.	.	.	.	0	0	0	PF00264,PF18132	Domain:Tyrosinase,Domain:Tyosinase_C	0	.	0	0	0.061	.	.	0.824	0.961	0.421	0.66	1	1	0	0	81975.1	744	-2	6.356	7	252	430	173	105	395	149	79	70	0.92	LIKR:[LIJVAP]X[KRTPEI]R&LXXR:43-46,KR:[KR]R:45-46,LVAR:LXXR:55-58,LEIR:[LIJVAP]X[KRTPEI]R&LXXR:91-94,RR:[KR]R:268-269,LRDR:LXXR:293-296,LSKR:[LIJVAP]X[KRTPEI]R&LXXR:460-463,KR:[KR]R:462-463	RQMD:46-49,RQLK:94-97,RFMA:112-115,RPYT:133-136,RPYL:164-167,KTFP:183-186,RPIA:269-272,RLFA:296-299,HMYF:347-350,RLLA:369-372,HPMA:390-393,KPFT:408-411,RVLG:428-431,RSYS:440-443,RTLS:458-461,RPFK:478-481,HVLS:487-490,HCFI:505-508,KSLH:600-603,HVYA:635-638,KPFT:673-676	0	1	0	SignalP3NN:26,SignalP4:26,Phobius:26,SignalP6:26	1	0
XPS75968.1	0.553	0.782	3.312	.	.	.	.	0	0	0	.	.	0	.	0	0.005	0.06	.	0.503	.	0.071	0.495	0.76	1	1	0	0	20399.7	204	-6	4.254	5	95	141	58	24	139	21	8	13	0.438	LTAR:LXXR:60-63	HLLP:56-59,KFYL:66-69	0	1	0	SignalP3NN:16,SignalP3HMM:16,SignalP4:16,SignalP5:16,DeepSig:16,SignalP6:16,Phobius:28	1	1
XPS80454.1	0.553	2.613	3.057	MpChi,MrChi,MoChi1	.	.	.	0	0	0	PF00704	Domain:Glyco_hydro_18	1	GH18	0	0	0.386	.	.	0.578	0.854	0.602	0.7	1	1	0	0	47786.8	427	5.5	8.899	0	131	230	118	63	231	92	50	42	1.337	.	RFLN:2-5,KGYQ:28-31,KHFV:45-48,RNLK:112-115,KPLP:212-215,RKLN:277-280,RSFA:288-291,KVLP:316-319,KKIM:329-332,RQFV:342-345,KYLQ:358-361,KSLV:381-384,KALG:389-392	0	0	0	SignalP3NN:18,SignalP3HMM:18,SignalP4:18,SignalP5:18,DeepSig:18,Phobius:18,SignalP6:18	1	1
XPS69529.1	0.552	3.304	3.309	.	.	.	.	0	0	0	.	.	0	.	0	1	0.73	.	.	0.692	0.877	0.437	0.49	1	1	0	0	7683.23	70	6	8.974	5	26	34	25	8	49	11	9	2	0.588	LAYR:LXXR:8-11	RAFV:11-14,KCMR:48-51	0	0	0	SignalP3NN:21,DeepSig:29,SignalP6:29,SignalP3HMM:31,SignalP5:31,Phobius:31	1	1
XPS69357.1	0.55	-1.014	2.133	.	.	.	.	0	0	0	PF00106	Domain:adh_short	0	.	0	0.002	0.403	.	.	0.887	0.768	0.412	0.35	1	1	0	0	36941.6	341	6	7.781	5	117	182	122	34	199	67	39	28	0.937	LKHR:LXXR:241-244,LGPR:[LIJVAP]X[KRTPEI]R&LXXR:305-308,PKIR:[LIJVAP]X[KRTPEI]R:311-314	RCLT:3-6,HGIK:101-104,RELI:122-125,RYYQ:126-129,HTIR:143-146,RNMF:176-179,HIMS:204-207,HRYK:243-246,KQII:293-296,RAFP:314-317	0	0	0	SignalP3HMM:19,Phobius:19,SignalP3NN:23,SignalP5:23	1	1
XPS67898.1	0.55	-0.517	0.356	.	.	.	.	0	0	0	PF09430	Domain:EMC7_beta-sandw	0	.	0	0.28	0.647	.	.	0.516	0.008	0.511	0.15	1	1	1	0	26354.8	242	-0.5	6.26	1	81	132	63	21	127	51	26	25	0.821	LKKR:[LIJVAP]X[KRTPEI]R&LXXR:239-242,KR:[KR]R:241-242	RFLL:19-22,RDYA:77-80,RAWQ:105-108,KEFY:139-142,KLME:174-177	0	1	0	SignalP3NN:17,SignalP3HMM:17,SignalP4:17,DeepSig:17,Phobius:17,SignalP5:18	1	1
XPS74155.1	0.547	-0.214	2.954	.	.	.	.	0	0	0	.	.	0	.	0	0.98	0.068	.	.	0.571	0.194	0.417	0.64	1	1	0	0	32694.2	317	-7.5	4.609	0	83	209	123	4	197	67	30	37	0.54	LPVR:LXXR:75-78,PVRR:[LIJVAP]X[KRTPEI]R:76-79,RR:[KR]R:78-79,PVKR:[LIJVAP]X[KRTPEI]R:111-114,KR:[KR]R:113-114,PIKR:[LIJVAP]X[KRTPEI]R:149-152,KR:[KR]R:151-152,LQSR:LXXR:224-227,LQSR:LXXR:274-277	REIK:227-230,KDLP:267-270	0	1	0	SignalP3NN:18,SignalP3HMM:18,SignalP4:18,SignalP5:18,DeepSig:18,Phobius:18,SignalP6:18	1	1
XPS80935.1	0.544	-2.474	2.378	.	.	.	.	0	0	0	PF01055,PF13802,PF17137	Family:Glyco_hydro_31,Domain:Gal_mutarotas_2,Family:DUF5110	0	GH31	0	0	0.031	.	.	0.769	0.082	0.42	0.15	1	1	0	0	113200	999	0.5	6.536	6	279	507	245	153	520	292	155	137	1.157	KR:[KR]R:47-48,KR:[KR]R:117-118,AIIR:[LIJVAP]X[KRTPEI]R:177-180,VDRR:[LIJVAP]X[KRTPEI]R:429-432,RR:[KR]R:431-432,LDKR:[LIJVAP]X[KRTPEI]R&LXXR:473-476,KR:[KR]R:475-476,LTER:[LIJVAP]X[KRTPEI]R&LXXR:604-607,RR:[KR]R:613-614,VLTR:[LIJVAP]X[KRTPEI]R:617-620,LLTR:[LIJVAP]X[KRTPEI]R&LXXR:677-680,IDTR:[LIJVAP]X[KRTPEI]R:697-700,RR:[KR]R:700-701,LRLR:LXXR:719-722,VIPR:[LIJVAP]X[KRTPEI]R:827-830,RR:[KR]R:8…	RAFA:50-53,RGFL:201-204,HVFG:273-276,RLYN:301-304,HWMS:371-374,RQYG:394-397,RRFD:431-434,KEYF:453-456,RKLV:478-481,KDLA:503-506,KGLF:539-542,RPFV:614-617,RAFY:620-623,KELL:675-678,RWYQ:680-683,HVIP:826-829,RRFS:880-883,RNIL:888-891,KSMD:911-914,KVII:920-923,RGWK:978-981	1	0	0	SignalP3NN:31,SignalP4:31,SignalP5:31,DeepSig:31,Phobius:31,SignalP6:31	1	0
XPS76550.1	0.544	-3.281	-0.204	.	.	.	.	0	0	0	.	.	0	.	0	0.063	0.448	.	.	0.922	0.125	0.543	0.32	1	1	1	0	31319.5	287	2	6.826	3	101	163	91	35	162	59	33	26	0.812	LSRR:[LIJVAP]X[KRTPEI]R&LXXR:209-212,RR:[KR]R:211-212,RR:[KR]R:239-240	KYLK:74-77,KTLA:81-84,RAMV:142-145,HHIA:148-151,HRIT:164-167,HDLS:231-234,RRMD:239-242	0	0	0	SignalP3NN:18,SignalP4:18,SignalP5:18,DeepSig:18,SignalP6:18,SignalP3HMM:20,Phobius:20	1	1
XPS78028.1	0.542	1.621	3.18	.	.	.	.	0	0	0	PF13577	Domain:SnoaL_4	0	.	0	0.601	0.479	.	.	0.661	0.99	0.51	0.42	1	1	0	0	20480.5	187	2.5	7.114	2	61	100	64	29	113	30	18	12	1.067	RR:[KR]R:186-187	HTIV:7-10,KPIK:50-53,HFYA:68-71,KAFP:77-80,HVFA:84-87,HLIG:123-126,HIID:128-131	0	0	0	SignalP4:20,DeepSig:20,Phobius:20,SignalP6:20,SignalP3NN:23,SignalP3HMM:23,SignalP5:23	1	1
XPS71266.1	0.541	0.289	3.307	.	.	.	.	0	0	0	PF07250,PF09118,PF00187	Family:Glyoxal_oxid_N,Domain:GO-like_E_set,Domain:Chitin_bind_1	1	AA5_1,AA5,AA5_2,CBM18	0	0	0.047	.	.	0.863	0.024	0.513	0.91	1	1	0	0	85165	813	7.5	7.362	31	326	522	213	79	479	130	72	58	0.748	PEKR:[LIJVAP]X[KRTPEI]R:68-71,KR:[KR]R:70-71,KR:[KR]R:405-406,KR:[KR]R:643-644	HCLV:35-38,HKLC:45-48,KDFG:148-151,HCLV:177-180,KGIR:399-402,RWYA:429-432,KSIN:476-479,HLMK:496-499,RTLP:523-526,RTYP:533-536,KPLD:579-582,RGMV:596-599,KRFT:643-646,RLYH:655-658,KALK:719-722,HSLH:753-756,HRLL:759-762,RNIA:786-789	0	0	0	SignalP3NN:17,SignalP4:17,SignalP5:17,DeepSig:17,Phobius:17,SignalP6:17	1	0
XPS73072.1	0.541	0.462	3.28	PpCBEL	.	.	.	0	0	0	PF09118,PF00024,PF01344	Domain:GO-like_E_set,Domain:PAN_1,Repeat:Kelch_1	0	AA5_2,AA5,AA5_1	0	0	0.01	.	.	0.787	0.993	0.461	0.88	1	1	0	0	74519.6	697	3.5	7.086	16	265	442	201	70	386	128	68	60	0.905	KR:[KR]R:194-195,LMAR:LXXR:321-324,AGTR:[LIJVAP]X[KRTPEI]R:422-425,AYPR:[LIJVAP]X[KRTPEI]R:482-485,RR:[KR]R:505-506,AVPR:[LIJVAP]X[KRTPEI]R:536-539,RR:[KR]R:645-646	KALN:71-74,KSFK:128-131,KRYD:194-197,RLLV:237-240,HDMF:278-281,RILI:292-295,RGYQ:324-327,RVFT:336-339,KALP:364-367,HGWL:388-391,KAMN:406-409,KILT:442-445,HLIN:462-465,RGFS:485-488,RSLV:506-509,KSWK:527-530,RNYH:539-542,RVFS:552-555,HYYL:674-677	0	0	0	SignalP3NN:21,SignalP4:21,SignalP5:21,DeepSig:21,Phobius:21,SignalP6:24	1	0
XPS74649.1	0.541	1.826	2.32	CfTom1	.	.	.	0	0	0	PF00150	Domain:Cellulase	0	GH5_7,GH5,GH5_41,GH5_19,GH5_42,GH158,GH5_10,GH5_18,GH5_31,GH5_13,GH5_46,GH5_22	0	0	0.381	.	.	0.542	0.278	0.67	0.58	1	1	0	0	44252.6	398	1	6.758	3	128	221	103	59	220	102	53	49	1.138	LGGR:LXXR:155-158,KR:[KR]R:323-324	KGFV:22-25,KDFY:37-40,KGMA:60-63,RTWG:74-77,KVIS:122-125,KLII:133-136,KKYV:174-177,KAIV:178-181,RNLP:207-210,KSLD:232-235,HSYP:280-283,KRLA:323-326,KPLV:384-387	0	0	0	SignalP3NN:17,SignalP3HMM:17,SignalP5:17,Phobius:17	1	1
XPS80403.1	0.541	-0.911	3.27	.	.	.	.	0	0	0	PF13472	Domain:Lipase_GDSL_2	0	.	0	0	0.112	.	.	0.714	0.717	0.624	0.78	1	1	0	0	47005.7	442	-0.5	6.437	0	167	263	136	52	249	70	38	32	0.825	LLAR:LXXR:247-250	HQIQ:113-116,KTLQ:118-121,HWYF:204-207,KHIS:258-261,RILG:271-274,HGIP:338-341,KFLA:391-394	0	1	0	SignalP3NN:19,SignalP3HMM:19,SignalP4:19,SignalP5:19,DeepSig:19,Phobius:19,SignalP6:19	1	1
XPS71795.1	0.537	1.091	2.796	.	.	.	.	0	0	0	PF00081,PF02777	Domain:Sod_Fe_N,Domain:Sod_Fe_C	0	.	0	0.226	0.503	.	.	0.58	0.519	0.462	0.31	1	1	0	0	27586.2	249	0.5	6.588	0	76	123	78	35	136	53	29	24	1.089	LGSR:LXXR:235-238	HSLF:110-113,KQIK:135-138,HAYY:204-207,RFLG:233-236,KVLK:243-246	0	0	0	SignalP3NN:22,SignalP3HMM:22,SignalP4:22,SignalP5:22,DeepSig:22,Phobius:22,SignalP6:22	1	1
XPS77259.1	0.53	4.612	3.31	BghBEC2,MoCDIP11,MoCDIP2,GoEC2,BghBEC4	.	.	.	0	0	0	PF05730	Domain:CFEM	1	.	0	0.609	0.234	.	0.895	.	0.877	0.594	0.73	1	1	0	0	10304.5	102	-11	3.474	8	46	78	33	5	64	17	3	14	0.471	.	.	0	0	0	SignalP3NN:19,SignalP3HMM:19,SignalP4:19,SignalP5:19,DeepSig:19,Phobius:25,SignalP6:25	1	1
XPS76718.1	0.529	-1.086	1.179	.	.	.	.	0	0	0	.	.	0	.	0	0.002	0.086	0.794	.	.	0.029	0.398	0.09	1	1	0	0	23696.3	207	-13.5	4.735	1	52	95	50	32	96	72	33	39	1.2	PDIR:[LIJVAP]X[KRTPEI]R:75-78,RR:[KR]R:78-79	RHMA:44-47,HHIS:50-53,HDYD:64-67,RTYG:79-82,KQMV:96-99,HHWE:150-153,KGIV:193-196,KNIP:198-201	0	0	0	DeepSig:25,SignalP3NN:27,SignalP3HMM:27,SignalP4:27,SignalP5:27,Phobius:27,SignalP6:27	1	1
XPS73014.1	0.527	-1.745	3.268	.	.	.	.	0	0	0	PF01565	Domain:FAD_binding_4	0	AA7	0	0	0.033	.	.	0.835	0.046	0.349	0.82	1	1	0	0	57967.8	535	-3	5.727	6	178	296	170	64	308	98	49	49	1.184	LISR:LXXR:115-118,ANIR:[LIJVAP]X[KRTPEI]R:208-211	KAFS:2-5,RTLN:63-66,RWFD:170-173,RGWA:211-214,KSYP:236-239,HAFP:261-264,KMWG:267-270,KLIA:273-276,KALD:282-285,KNIS:337-340,HTLP:349-352,RSLF:379-382,KAFN:387-390,HRIL:452-455,KDLN:472-475,HDYI:476-479,KLIS:501-504,KQFD:507-510	0	0	0	SignalP3NN:18,SignalP3HMM:18,SignalP4:18,SignalP5:18,DeepSig:18,Phobius:18,SignalP6:18	1	1
XPS78424.1	0.525	-2.497	2.925	.	.	.	.	0	0	0	PF00732,PF05199	Domain:GMC_oxred_N,Domain:GMC_oxred_C	0	AA3_2,AA3,AA3_3,AA3_1	0	0	0.009	.	.	0.947	0.004	0.359	0.49	1	1	0	0	67906.8	619	9	7.93	3	192	343	192	72	342	137	77	60	1.014	LSLR:LXXR:3-6,VRER:[LIJVAP]X[KRTPEI]R:165-168,VQKR:[LIJVAP]X[KRTPEI]R:245-248,KR:[KR]R:247-248,KR:[KR]R:326-327,LYMR:LXXR:342-345,LPKR:[LIJVAP]X[KRTPEI]R&LXXR:420-423,KR:[KR]R:422-423,LAQR:LXXR:435-438,LLQR:LXXR:519-522	RLLS:6-9,KSLA:26-29,KTWS:103-106,KGLA:146-149,KYFK:150-153,RAYG:176-179,KEIM:196-199,HTIE:209-212,RPLG:216-219,RLLT:252-255,KPLT:268-271,HLLL:305-308,RDLP:327-330,KQFS:398-401,HNIT:405-408,KRYS:422-425,KALL:428-431,KGFL:432-435,RKIL:438-441,HYLS:444-447,KPLS:469-472,KHWT:512-515,RVYG:577-580	0	0	0	SignalP3NN:20,SignalP3HMM:20,SignalP4:20,SignalP5:21,DeepSig:21,SignalP6:21,Phobius:22	1	1
XPS79305.1	0.525	-1.722	2.506	.	.	.	.	0	0	0	PF07687,PF01546	Domain:M20_dimer,Family:Peptidase_M20	0	.	0	0	0.095	.	.	0.72	0.984	0.439	0.15	1	1	0	0	44279.9	407	-9.5	4.965	2	129	216	130	42	222	101	48	53	1.023	KR:[KR]R:91-92,LELR:LXXR:237-240,IATR:[LIJVAP]X[KRTPEI]R:276-279,RR:[KR]R:350-351,ALKR:[LIJVAP]X[KRTPEI]R:368-371,KR:[KR]R:370-371,LDYR:LXXR:379-382,RR:[KR]R:382-383	KELL:36-39,KKLV:43-46,KILR:149-152,KAFS:171-174,KGIL:200-203,RRYL:350-353,KELE:372-375,RRLI:382-385	0	0	0	SignalP3NN:17,SignalP3HMM:17,SignalP4:17,SignalP5:17,DeepSig:17,Phobius:17,SignalP6:17	1	1
XPS69700.1	0.524	0.59	-0.188	.	.	.	.	0	0	0	PF01105	Domain:EMP24_GP25L	0	.	0	0.815	0.517	0.65	.	.	0.766	0.402	0.05	1	1	1	0	24502.1	217	0.5	6.609	2	54	107	74	25	122	68	36	32	1.022	RR:[KR]R:151-152,LRVR:LXXR:167-170	RIMR:3-6,RNFV:42-45,KDWN:132-135,RRIE:151-154,KWFA:186-189,RAYF:208-211,KHLI:214-217	0	0	0	SignalP3NN:21,SignalP3HMM:21,SignalP4:21,SignalP5:21,DeepSig:21,SignalP6:21,Phobius:23	1	1
XPS69138.1	0.52	-2.043	2.965	.	.	.	.	0	0	0	PF14686,PF14683	Domain:fn3_3,Domain:CBM-like	0	PL4_3,PL4,PL4_4,PL4_2,PL4_5,PL4_1	0	0	0.044	.	.	0.866	0.187	0.47	0.79	1	1	0	0	76716.9	690	-15	4.995	5	225	398	177	111	377	142	68	74	1.132	RR:[KR]R:545-546,AHKR:[LIJVAP]X[KRTPEI]R:571-574,KR:[KR]R:573-574,LLPR:[LIJVAP]X[KRTPEI]R&LXXR:673-676	RLFV:35-38,HTFS:153-156,RNLQ:169-172,RTLF:175-178,HGLF:252-255,RTFG:316-319,KTLR:335-338,RIYW:501-504,KDFN:528-531,HDLA:568-571,HELE:613-616,HKFL:641-644,RSIY:676-679	0	0	0	SignalP3NN:18,SignalP3HMM:18,SignalP4:18,SignalP5:18,DeepSig:18,Phobius:18,SignalP6:18	1	1
XPS78936.1	0.518	1.147	3.311	.	.	.	.	0	0	0	PF11327	Family:Egh16-like	1	.	0	0.077	0.091	.	.	0.717	0.983	0.744	0.65	1	1	0	0	27868.4	287	7.5	10.044	2	144	196	95	12	180	45	27	18	0.356	KR:[KR]R:105-106,AKKR:[LIJVAP]X[KRTPEI]R:264-267,KR:[KR]R:266-267,LRKR:[LIJVAP]X[KRTPEI]R&LXXR:273-276,KR:[KR]R:275-276	KEMG:63-66,RGLL:106-109,RMMN:242-245,RHMA:276-279,RGIL:280-283	0	0	0	SignalP3NN:18,SignalP3HMM:18,SignalP4:18,SignalP5:18,DeepSig:18,Phobius:18,SignalP6:18	1	1
XPS81775.1	0.512	0.254	3.04	CfTom1	.	.	.	0	0	0	PF00150	Domain:Cellulase	0	GH5_9,GH5_45,GH5_14,GH5,GH5_50,GH5_44,GH5_15,GH5_54,GH5_47,GH5_33,GH5_49,GH5_46,GH5_22,GH5_38,GH5_52,GH5_23,GH5_39,GH5_25,GH5_36,GH5_42,GH5_48,GH5_8,GH5_5,GH5_26,GH5_18	0	0	0.125	.	.	0.927	0.036	0.286	0.64	1	1	0	0	44856.9	411	-8.5	5.099	4	145	232	105	55	225	93	45	48	0.93	LAKR:[LIJVAP]X[KRTPEI]R&LXXR:28-31,KR:[KR]R:30-31,LTAR:LXXR:401-404	KVMI:148-151,HTIK:182-185,RQFY:220-223,HHYE:264-267,KWLN:313-316,RFIE:358-361,KDLL:389-392,RKYP:404-407	0	0	0	SignalP3NN:20,SignalP3HMM:20,SignalP4:20,SignalP5:20,DeepSig:20,Phobius:20,SignalP6:31	1	1
XPS78296.1	0.511	-1.368	2.689	.	.	.	.	0	0	0	PF00026	Family:Asp	0	.	0	0	0.076	.	.	0.566	0.389	0.295	0.16	1	1	0	0	53371.8	473	4.5	7.339	11	133	239	132	63	254	121	65	56	1.453	IVKR:[LIJVAP]X[KRTPEI]R:27-30,KR:[KR]R:29-30,ILIR:[LIJVAP]X[KRTPEI]R:264-267,LSFR:LXXR:271-274,ALTR:[LIJVAP]X[KRTPEI]R:278-281	RTFQ:39-42,RVLK:44-47,KQFP:108-111,KDLI:144-147,KNLK:151-154,KYLT:197-200,KGFE:227-230,KNYY:240-243,KMIK:251-254,HALA:305-308,RSLG:309-312,RTFA:322-325,HGIA:381-384,KIIA:390-393,RGLQ:394-397,HVYR:403-406,HAFI:416-419,KAIL:441-444	0	0	0	SignalP3NN:17,SignalP3HMM:17,SignalP4:17,SignalP5:17,DeepSig:17,Phobius:17,SignalP6:17	1	1
XPS80189.1	0.51	0.228	3.087	.	.	.	.	0	0	0	PF01328	Family:Peroxidase_2	0	.	0	0	0.333	.	.	0.614	0.555	0.429	0.72	1	1	0	0	45603.4	426	0	6.496	3	145	241	130	55	258	70	37	33	0.917	LEAR:LXXR:33-36,LEAR:LXXR:44-47,RR:[KR]R:303-304	HAFP:17-20,KELA:38-41,KMLE:42-45,KQYI:68-71,HEYV:79-82,HNFI:102-105,RFMA:256-259,KNWY:299-302,RALE:304-307,KFLD:328-331,KAID:406-409,KLLK:411-414	0	0	0	SignalP3NN:18,SignalP3HMM:18,SignalP4:18,SignalP5:18,Phobius:18,SignalP6:18,DeepSig:28	1	1
XPS69282.1	0.508	-0.061	2.95	.	.	.	.	0	0	0	PF01070	Domain:FMN_dh	0	.	0	0	0.387	.	.	0.739	0.009	0.64	0.57	1	1	0	0	42308	386	0	6.504	1	119	206	127	45	222	79	41	38	1.112	LAAR:LXXR:13-16,VFTR:[LIJVAP]X[KRTPEI]R:83-86,LRPR:[LIJVAP]X[KRTPEI]R&LXXR:89-92	RPFL:16-19,RKYM:56-59,HRLR:87-90,RVLN:92-95,HNFS:111-114,KAII:198-201,RQFS:236-239,KGIQ:249-252,KAIF:266-269,RQLD:276-279,KLLA:318-321,RPFM:331-334,KVID:346-349,KKIG:368-371	0	0	0	SignalP3NN:14,SignalP3HMM:14,SignalP4:14,SignalP5:14,DeepSig:14,Phobius:14,SignalP6:14	1	1
XPS79085.1	0.508	-2.25	2.87	.	.	.	.	0	0	0	PF17389,PF17390	Repeat:Bac_rhamnosid6H,Domain:Bac_rhamnosid_C	0	GH78	0	0	0.067	.	.	0.944	0.024	0.411	0.77	1	1	0	0	75265.6	696	-2.5	6.306	5	271	412	197	95	385	126	67	59	0.747	PATR:[LIJVAP]X[KRTPEI]R:45-48,PIER:[LIJVAP]X[KRTPEI]R:153-156,LLVR:LXXR:204-207,KR:[KR]R:254-255,ALTR:[LIJVAP]X[KRTPEI]R:525-528,LHYR:LXXR:555-558,RR:[KR]R:610-611,LVWR:LXXR:657-660	KPWD:36-39,RAIS:121-124,RFLT:162-165,RAYG:191-194,HFYT:196-199,RTWY:207-210,RWLP:227-230,RAIW:257-260,HVWS:321-324,HGLD:350-353,HALA:392-395,RQWS:423-426,HLLW:438-441,HALT:482-485,RALA:522-525,RTLW:528-531,HGWS:574-577,RTWR:597-600	0	0	0	SignalP3NN:32,SignalP4:32,SignalP5:32,Phobius:32,SignalP6:32	1	0
XPS68062.1	0.506	-1.08	2.806	.	.	.	.	0	0	0	PF00544	Repeat:Pectate_lyase_4	0	PL1_4,PL1,PL1_5,PL1_7,PL1_2,PL1_10,PL1_8,PL1_9,PL1_6	0	0	0.113	.	.	0.541	0.007	0.385	0.74	1	1	0	0	40130.6	379	-10.5	4.782	6	147	234	109	38	202	82	38	44	0.978	LIGR:LXXR:191-194,PSKR:[LIJVAP]X[KRTPEI]R:203-206,KR:[KR]R:205-206	KSLL:4-7,KYLT:50-53,RVII:58-61,KEFN:64-67,KSIV:128-131,KGIR:142-145,HHYW:227-230,HAFS:280-283,RVLA:291-294,KPIE:304-307	0	0	0	SignalP3NN:17,SignalP4:17,DeepSig:17,Phobius:17,SignalP6:17,SignalP5:18,SignalP3HMM:22	1	1
XPS73084.1	0.504	-0.808	3.017	.	.	.	.	0	0	0	PF00245	Domain:Alk_phosphatase	0	.	0	0	0.214	.	.	0.736	0.227	0.319	0.57	1	1	0	0	54083.2	496	3.5	6.847	7	166	268	142	56	271	122	67	55	0.966	KR:[KR]R:223-224,KR:[KR]R:371-372,LSSR:LXXR:406-409,VGKR:[LIJVAP]X[KRTPEI]R:482-485,KR:[KR]R:484-485	RNFI:28-31,RDYV:47-50,KTYN:101-104,HEIG:162-165,HPLG:168-171,RCYF:182-185,KGYH:208-211,KAFD:217-220,KGYF:279-282,REWI:317-320,KSYN:364-367,RAYL:372-375,RDLS:485-488	0	0	0	SignalP6:17,SignalP3NN:20,SignalP3HMM:20,SignalP4:20,SignalP5:20,DeepSig:20,Phobius:20	1	1
XPS76836.1	0.504	-0.874	3.21	.	.	.	.	0	0	0	PF00710,PF17763	Domain:Asparaginase,Domain:Asparaginase_C	0	.	0	0	0.107	.	.	0.681	0.917	0.309	0.69	1	1	0	0	38912	371	-9.5	4.542	1	137	224	125	33	214	55	24	31	0.892	LFVR:LXXR:30-33,LNDR:LXXR:195-198	KGFT:2-5,HKLF:28-31,KTIS:106-109,HMIN:114-117,RILL:344-347,KSLP:366-369	0	0	0	SignalP3NN:17,SignalP3HMM:17,SignalP4:17,SignalP5:17,DeepSig:17,Phobius:17,SignalP6:17	1	1
XPS70792.1	0.504	-1.052	2.862	.	.	.	.	0	0	0	PF01975	Family:SurE	0	.	0	0	0.123	.	.	0.572	0.005	0.543	0.63	1	1	0	0	36758.3	351	-11	4.437	1	133	227	119	36	214	59	25	34	0.714	VLPR:[LIJVAP]X[KRTPEI]R:118-121,VKTR:[LIJVAP]X[KRTPEI]R:236-239,KR:[KR]R:331-332,VEER:[LIJVAP]X[KRTPEI]R:334-337,KR:[KR]R:340-341	KILM:23-26,RELY:38-41,KLLV:42-45,HIFY:99-102,RYYP:121-124,RSIP:163-166,KRMV:331-334	0	0	0	Phobius:18,SignalP3NN:21,SignalP3HMM:21,SignalP4:21,SignalP5:21,DeepSig:21,SignalP6:21	1	1
XPS75630.1	0.5	4.548	3.297	.	.	.	.	0	0	0	.	.	0	.	0	0.621	0.64	0.857	.	.	0.509	0.431	0.27	1	1	0	0	9809.21	88	4	9.092	1	29	44	20	11	45	22	14	8	1	RR:[KR]R:42-43,KR:[KR]R:50-51	KRLP:50-53	0	0	0	SignalP5:19,SignalP3NN:21,SignalP3HMM:21,DeepSig:21,Phobius:21	1	1
XPS75028.1	0.499	-0.284	-2.027	.	.	.	.	0	0	0	PF10270	Family:MMgT	0	.	0	0.984	0.69	0.553	.	.	0.666	0.524	0.23	0	1	0	1	14766.7	135	-0.5	6.234	0	46	67	40	18	79	35	18	17	0.829	RR:[KR]R:114-115,KR:[KR]R:123-124	KPIQ:62-65,RGFW:115-118,KEYD:125-128	0	0	0	SignalP3NN:22,SignalP3HMM:22,Phobius:22	1	1
XPS74036.1	0.493	-0.079	3.119	.	.	.	.	0	0	0	PF00264	Domain:Tyrosinase	0	.	0	0.007	0.41	.	.	0.941	0.988	0.585	0.27	1	1	0	0	35566.1	319	-1.5	6.306	6	99	171	87	46	176	77	41	36	0.986	IHPR:[LIJVAP]X[KRTPEI]R:17-20,PEKR:[LIJVAP]X[KRTPEI]R:263-266,KR:[KR]R:265-266,IPIR:[LIJVAP]X[KRTPEI]R:302-305	HKFA:4-7,RSLK:36-39,HCLA:51-54,HRYF:91-94,HTYE:96-99,HCLS:175-178,RSFN:179-182,KMLG:190-193,HALS:205-208,RLWY:253-256,RTFE:266-269,KDIP:300-303,RDIM:305-308	1	0	0	SignalP3NN:16,SignalP3HMM:16,Phobius:19	1	1
XPS78566.1	0.492	0.522	3.14	MoCDIP8	.	.	.	0	0	0	PF03372	Domain:Exo_endo_phos	0	.	0	0	0.047	.	.	0.738	0.461	0.383	0.58	1	1	0	0	65696	609	-7.5	5.187	2	198	365	180	55	324	140	68	72	1.074	PLTR:[LIJVAP]X[KRTPEI]R:3-6,LWIR:[LIJVAP]X[KRTPEI]R&LXXR:54-57	RLIA:6-9,KFLS:29-32,RTFG:76-79,KVFE:93-96,KDYI:101-104,KKYG:169-172,RALT:190-193,RILP:266-269,KPLT:280-283,KAIS:360-363,RLYK:402-405,KPLV:442-445,KEIL:504-507,RIIT:514-517,KQYV:531-534,KDMD:540-543,HMFI:567-570	1	0	0	SignalP3NN:19,SignalP4:19,SignalP5:19,DeepSig:19,SignalP6:19,SignalP3HMM:23,Phobius:23	1	1
XPS73632.1	0.492	0.651	3.226	.	.	.	.	0	0	0	PF10281	Repeat:Ish1	0	.	0	0	0.05	0.548	.	.	0.007	0.576	0.57	1	1	0	0	45760.8	434	5.5	9.28	0	198	274	138	39	205	91	49	42	0.729	LTAR:LXXR:85-88,PQPR:[LIJVAP]X[KRTPEI]R:150-153,PSTR:[LIJVAP]X[KRTPEI]R:207-210,RR:[KR]R:218-219,KR:[KR]R:275-276	RWLS:39-42,KNLQ:55-58,KSLS:79-82,KSLA:101-104,KDWI:126-129,KAFA:139-142,KSWF:194-197,RGYN:200-203,KEWA:260-263,RLYG:289-292	1	0	0	SignalP3NN:19,SignalP3HMM:19,SignalP4:19,SignalP5:19,DeepSig:19,Phobius:19,SignalP6:19	1	1
XPS73631.1	0.492	0.662	3.236	.	.	.	.	0	0	0	PF10281	Repeat:Ish1	0	.	0	0	0.05	0.549	.	.	0.007	0.575	0.58	1	1	0	0	45689.7	433	5.5	9.28	0	197	273	137	39	204	91	49	42	0.735	LTAR:LXXR:84-87,PQPR:[LIJVAP]X[KRTPEI]R:149-152,PSTR:[LIJVAP]X[KRTPEI]R:206-209,RR:[KR]R:217-218,KR:[KR]R:274-275	RWLS:38-41,KNLQ:54-57,KSLS:78-81,KSLA:100-103,KDWI:125-128,KAFA:138-141,KSWF:193-196,RGYN:199-202,KEWA:259-262,RLYG:288-291	1	0	0	SignalP3NN:19,SignalP3HMM:19,SignalP4:19,SignalP5:19,DeepSig:19,Phobius:19,SignalP6:19	1	1
XPS81676.1	0.492	0.226	2.989	Cgfl,FoMep1	.	.	.	0	0	0	PF02128,PF07504	Family:Peptidase_M36,Motif:FTP	1	.	0	0	0.065	.	.	0.799	0.051	0.622	0.64	1	1	0	0	70456.3	642	-10	5.273	5	212	372	177	81	341	151	74	77	1.066	LARR:[LIJVAP]X[KRTPEI]R&LXXR:30-33,RR:[KR]R:32-33,LRAR:LXXR:63-66,LGKR:[LIJVAP]X[KRTPEI]R&LXXR:148-151,KR:[KR]R:150-151,LSWR:LXXR:215-218,LSNR:LXXR:442-445,AGIR:[LIJVAP]X[KRTPEI]R:499-502,LYQR:LXXR:522-525,KR:[KR]R:617-618	RAID:33-36,HFYF:101-104,KVFS:127-130,RQIV:267-270,RDLK:323-326,KKYA:339-342,HDLL:357-360,RMFV:414-417,HEYT:436-439,HGLS:440-443,KDYS:486-489,RNYL:502-505,HPIG:527-530,KYLA:568-571,RGLG:618-621	0	0	0	SignalP3NN:20,SignalP3HMM:20,SignalP4:20,SignalP5:20,Phobius:20,SignalP6:20	1	1
XPS71806.1	0.492	-1.789	2.941	.	.	.	.	0	0	0	PF07632	Family:DUF1593	0	.	0	0	0.044	.	.	0.816	0.949	0.223	0.49	1	1	0	0	55424.6	506	-11.5	4.921	3	173	289	144	59	269	112	53	59	0.825	LPNR:LXXR:81-84,RR:[KR]R:348-349,LVER:[LIJVAP]X[KRTPEI]R&LXXR:361-364,PLTR:[LIJVAP]X[KRTPEI]R:494-497	HVLS:18-21,HAIN:22-25,RYIL:48-51,REYN:84-87,HLLK:104-107,HLLS:128-131,KSLL:155-158,RILY:164-167,RALK:179-182,KAYD:235-238,RGLP:252-255,RSWL:280-283,RGWT:374-377,RVII:500-503	0	0	0	Phobius:17,SignalP3NN:21,SignalP3HMM:21,SignalP4:21,SignalP5:21,DeepSig:21,SignalP6:21	1	1
XPS76831.1	0.492	-0.442	2.978	.	.	.	.	0	0	0	PF00026	Family:Asp	0	.	0	0	0.239	.	.	0.613	0.087	0.472	0.71	1	1	0	0	44873.5	426	1	7.134	2	162	262	123	44	245	72	37	35	0.808	RR:[KR]R:25-26,LAKR:[LIJVAP]X[KRTPEI]R&LXXR:29-32,KR:[KR]R:31-32,AYTR:[LIJVAP]X[KRTPEI]R:71-74	RLFF:5-8,RSFK:32-35,RQLN:38-41,KVFR:56-59,KTFF:231-234	0	0	1	SignalP3NN:19,SignalP3HMM:19,SignalP4:19,SignalP5:19,DeepSig:19,SignalP6:19,Phobius:26	1	1
XPS71410.1	0.492	2.349	3.303	.	.	.	.	0	0	0	.	.	0	.	0	0.988	0.542	.	.	0.63	0.114	0.224	0.45	1	1	0	0	8117.51	72	6	9.896	3	20	34	24	6	38	17	12	5	1.444	LQHR:LXXR:20-23,KR:[KR]R:70-71	HVLL:2-5,HRYR:22-25,RVFI:45-48,RVLR:54-57	0	0	0	Phobius:12,SignalP3HMM:15,SignalP3NN:20,SignalP4:20,DeepSig:20	1	1
XPS81813.1	0.489	-0.098	2.28	CfTom1	.	.	.	0	0	0	PF00150	Domain:Cellulase	0	GH5_31,GH5_7,GH5,GH5_41,GH5_19,GH128	0	0	0.164	.	.	0.877	0.474	0.311	0.69	1	1	0	0	40021.9	365	-4.5	5.736	4	135	198	108	54	201	73	37	36	1.048	.	KSFS:24-27,KVLR:55-58,KFMM:97-100,HSYN:103-106,KLLI:108-111,HSYI:114-117,RDFY:123-126,KWYG:128-131,HVLS:151-154,KTWA:162-165,HAYG:242-245,KTYV:255-258,KKLI:266-269,HGWD:327-330	0	0	0	SignalP3NN:22,SignalP3HMM:22,SignalP4:22,SignalP5:22,DeepSig:22,Phobius:22,SignalP6:22	1	1
XPS71899.1	0.487	-1.371	3.18	.	.	.	.	0	0	0	PF03663	Repeat:Glyco_hydro_76	0	GH76	0	0	0.131	.	.	0.873	0.383	0.237	0.64	1	1	0	0	38048.3	350	-11	4.507	3	132	199	111	43	196	71	31	40	0.91	LANR:LXXR:166-169	KYLL:2-5,KLLQ:30-33,KWYS:35-38,KGYK:87-90,KYLD:118-121,KDLF:124-127,HPLD:268-271,RGLS:283-286	0	0	0	SignalP6:17,SignalP3NN:19,SignalP3HMM:19,SignalP4:19,SignalP5:19,DeepSig:19,Phobius:19	1	1
XPS72180.1	0.486	-2.686	2.262	.	.	.	.	0	0	0	PF13883	Domain:Pyrid_oxidase_2	0	.	0	0.004	0.086	.	.	0.927	0.177	0.352	0.17	1	1	0	0	27949.5	252	-5	5.301	2	83	136	73	33	137	57	28	29	0.852	RR:[KR]R:50-51,LSMR:LXXR:122-125	RLFT:24-27,RRIL:50-53,RAYI:203-206,KEWY:212-215,KSWV:239-242	0	0	0	SignalP3NN:16,SignalP3HMM:16,SignalP4:16,SignalP5:16,DeepSig:16,Phobius:16,SignalP6:16	1	1
XPS80363.1	0.486	-2.014	-0.108	.	.	.	.	0	0	0	PF03388	Domain:Lectin_leg-like	0	.	0	0.006	0.524	.	.	0.652	0.992	0.512	0.63	1	1	1	0	35843.4	320	1	6.86	3	100	171	76	46	175	73	38	35	1.145	LFSR:LXXR:82-85,LYKR:[LIJVAP]X[KRTPEI]R&LXXR:256-259,KR:[KR]R:258-259	KAIS:32-35,HSLE:39-42,RWWD:53-56,RGIR:183-186,KALN:252-255	0	0	0	SignalP3NN:22,SignalP3HMM:22,SignalP4:22,SignalP5:22,DeepSig:22,SignalP6:22,Phobius:26	1	1
XPS78227.1	0.485	-2.334	2.723	.	.	.	.	0	0	0	PF00246	Domain:Peptidase_M14	0	.	0	0	0.02	.	.	0.9	0.963	0.391	0.33	1	1	0	0	49518	438	-11.5	5.071	3	129	231	117	69	234	108	52	56	1.076	VSIR:[LIJVAP]X[KRTPEI]R:16-19,VQKR:[LIJVAP]X[KRTPEI]R:43-46,KR:[KR]R:45-46,AIPR:[LIJVAP]X[KRTPEI]R:65-68,LNTR:[LIJVAP]X[KRTPEI]R&LXXR:79-82,KR:[KR]R:103-104,ANTR:[LIJVAP]X[KRTPEI]R:264-267,VRPR:[LIJVAP]X[KRTPEI]R:281-284,PPER:[LIJVAP]X[KRTPEI]R:402-405	KVYH:30-33,KRLA:45-48,RVLH:82-85,HPYE:118-121,KELQ:128-131,REIY:150-153,HMWG:156-159,REWI:177-180,KQLI:190-193,RLWR:231-234,RDIN:252-255,RNWE:256-259,HNWD:260-263,RNLR:297-300,KLYI:306-309,HSYS:312-315,HVYA:376-379,KVLL:418-421	0	0	0	SignalP3NN:15,SignalP3HMM:15,SignalP4:15,DeepSig:15,SignalP5:17,Phobius:19,SignalP6:19	1	1
XPS72336.1	0.485	-1.607	2.955	.	.	.	.	0	0	0	PF14686,PF14683	Domain:fn3_3,Domain:CBM-like	0	PL4_3,PL4,PL4_4,PL4_2,PL4_1	0	0	0.068	.	.	0.722	0.019	0.455	0.65	1	1	0	0	73827.1	661	0	6.508	4	205	368	167	103	354	148	78	70	1.231	.	RGYI:45-48,KLFN:93-96,HTFS:135-138,RNLQ:151-154,RTMF:157-160,HGMW:228-231,RTFG:292-295,KFYD:326-329,KAYQ:379-382,HGYA:459-462,HPLL:467-470,RLYW:475-478,KALN:502-505,KDLQ:585-588,KLLK:620-623,KNYE:638-641	0	0	0	SignalP3NN:19,SignalP3HMM:19,SignalP4:19,SignalP5:19,DeepSig:19,Phobius:19,SignalP6:19	1	1
XPS74705.1	0.484	0.843	3.065	.	.	.	.	0	0	0	.	.	0	.	0	0.92	0.346	.	.	0.748	0.49	0.391	0.49	1	1	0	0	9056.51	82	3.5	7.7	5	27	48	21	12	51	14	10	4	0.458	.	RGWV:66-69	0	0	0	SignalP5:24,SignalP3HMM:39,Phobius:39	0	1
XPS78547.1	0.484	-0.201	3.185	.	.	.	.	0	0	0	PF00264	Domain:Tyrosinase	0	.	0	0	0.284	.	.	0.733	0.63	0.524	0.4	1	1	0	0	41870.9	384	-1	6.36	8	137	222	113	46	203	87	46	41	1.049	AIKR:[LIJVAP]X[KRTPEI]R:19-22,KR:[KR]R:21-22,VSTR:[LIJVAP]X[KRTPEI]R:100-103,LTPR:[LIJVAP]X[KRTPEI]R&LXXR:162-165,LWHR:LXXR:174-177,VKIR:[LIJVAP]X[KRTPEI]R:365-368	HTLT:50-53,HDLV:68-71,KCLM:134-137,KFLL:171-174,HRYY:176-179,KWLG:218-221,HCLA:251-254,KTIN:261-264,HAWG:291-294,HGFI:318-321,RNFH:323-326,KALT:348-351,RDIL:368-371	0	0	0	SignalP3NN:17,SignalP3HMM:17,SignalP4:17,DeepSig:17,Phobius:17,SignalP6:22	1	1
XPS77356.1	0.484	4.141	-1.292	.	.	.	.	0	0	0	PF00160	Domain:Pro_isomerase	1	.	0	0.995	0.951	0.577	0.62	.	0.921	0.529	0.39	0	0	0	0	18208.6	172	4	8.286	3	65	98	42	19	96	38	22	16	0.955	.	RALC:37-40,KPLH:51-54,RVIP:62-65	0	0	0	.	0	0
XPS80772.1	0.484	-0.962	2.18	.	.	.	.	0	0	0	.	.	0	.	0	0.002	0.244	.	.	0.584	0.979	0.677	0.16	1	1	0	0	35442	313	-5.5	5.077	0	87	160	93	43	170	79	38	41	1.132	IKTR:[LIJVAP]X[KRTPEI]R:280-283	RSFV:2-5,RDIE:48-51,KPFH:53-56,RTLE:102-105,HRMN:117-120,KSFS:179-182,RKYL:200-203,KDLT:222-225,KQID:258-261,KGIK:266-269,RYWN:271-274,RTLW:288-291	1	0	0	SignalP3NN:23,SignalP3HMM:23,SignalP4:23,SignalP5:23,DeepSig:23,SignalP6:23,Phobius:25	1	1
XPS75847.1	0.483	-0.753	2.953	.	.	.	.	0	0	0	PF01828	Family:Peptidase_A4	0	.	0	0.001	0.114	.	.	0.54	0.867	0.679	0.76	1	1	0	0	29027.1	277	-2.5	5.274	2	122	182	83	29	144	45	22	23	0.871	LAQR:LXXR:23-26,RR:[KR]R:35-36	.	0	0	0	SignalP3NN:18,SignalP3HMM:18,SignalP4:18,SignalP5:18,DeepSig:18,Phobius:18,SignalP6:26	1	1
XPS78269.1	0.482	2.013	3.121	.	.	.	.	0	0	0	.	.	0	.	0	0.94	0.434	.	.	0.512	0.808	0.209	0.25	1	1	0	0	7962.43	70	5.5	10.428	2	23	32	25	6	39	16	11	5	0.923	RR:[KR]R:28-29	KHLT:56-59	0	0	0	SignalP3NN:18,SignalP4:18,SignalP5:18,SignalP6:18,SignalP3HMM:22,DeepSig:22,Phobius:22	1	1
XPS77234.1	0.481	0.2	2.667	.	.	.	.	0	0	0	PF04389	Family:Peptidase_M28	0	.	0	0	0.055	0.709	.	.	0.017	0.387	0.12	1	1	0	0	43040.6	388	-10.5	4.974	3	119	194	118	46	198	103	49	54	1.288	ALRR:[LIJVAP]X[KRTPEI]R:60-63,RR:[KR]R:62-63,RR:[KR]R:262-263	REIA:82-85,KELD:106-109,KHLE:115-118,RYYK:126-129,KAFP:159-162,HPWG:163-166,RVLL:219-222,HWYS:239-242,KAML:266-269,KTLD:279-282,HMLQ:367-370	0	0	0	SignalP4:15,DeepSig:17,SignalP3NN:19,SignalP3HMM:19,SignalP5:19,Phobius:19,SignalP6:19	1	1
XPS78032.1	0.48	-1.805	1.725	.	.	.	.	0	0	0	PF01400	Domain:Astacin	0	.	0	0	0.346	.	.	0.9	0.448	0.376	0.43	1	1	0	0	42385.7	373	1	6.6	5	105	189	89	62	204	89	49	40	1.112	LGGR:LXXR:126-129,LYDR:LXXR:175-178,KR:[KR]R:320-321	HILG:58-61,KPWP:67-70,HSLG:116-119,RSLY:129-132,RIMV:151-154,HGLR:179-182,HEMG:200-203,HIFG:204-207,KNLR:226-229,HKYT:292-295,RTYD:300-303,KSIM:305-308,RKLD:321-324,KALK:363-366	1	0	0	SignalP3NN:24,Phobius:24,SignalP3HMM:25,SignalP4:25,SignalP5:25,DeepSig:25,SignalP6:25	1	1
XPS74409.1	0.479	-1.917	3.304	.	.	.	.	0	0	0	PF00199,PF18011,PF06628	Domain:Catalase,Domain:Catalase_C,Family:Catalase-rel	0	.	0	0	0.01	.	.	0.928	0.747	0.324	0.49	1	1	0	0	81419.9	744	-10.5	5.474	1	238	424	212	95	397	165	82	83	0.952	KR:[KR]R:39-40,AGER:[LIJVAP]X[KRTPEI]R:83-86,VPER:[LIJVAP]X[KRTPEI]R:108-111,VFIR:[LIJVAP]X[KRTPEI]R:148-151,VKPR:[LIJVAP]X[KRTPEI]R:207-210,LQGR:LXXR:394-397	KIMH:99-102,HGFA:169-172,RFYT:174-177,HTLF:237-240,RSFR:250-253,HTFR:261-264,RTLQ:280-283,RNYF:366-369,RGID:384-387,RLFS:397-400,RGFF:465-468,RLFF:495-498,RPLQ:675-678,KTFK:732-735	0	0	0	SignalP3NN:19,SignalP3HMM:19,SignalP4:19,SignalP5:19,DeepSig:19,Phobius:19,SignalP6:19	1	1
XPS71666.1	0.479	-1.797	3.244	.	.	.	.	0	0	0	PF18565,PF16355,PF02836,PF02837,PF00703	Domain:Glyco_hydro2_C5,Family:DUF4982,Domain:Glyco_hydro_2_C,Domain:Glyco_hydro_2_N,Domain:Glyco_hydro_2	0	GH2,GH158,CBM67	0	0	0.024	.	.	0.901	0.954	0.469	0.46	1	1	0	0	98563.8	889	-13	5.569	3	271	500	241	117	475	212	106	106	0.969	RR:[KR]R:155-156,LAIR:[LIJVAP]X[KRTPEI]R&LXXR:215-218,VTTR:[LIJVAP]X[KRTPEI]R:255-258,AAER:[LIJVAP]X[KRTPEI]R:399-402,LTDR:LXXR:429-432,RR:[KR]R:471-472,KR:[KR]R:496-497,LSSR:LXXR:586-589	RLYG:6-9,HVIQ:23-26,RQYH:28-31,RFWR:47-50,RPYI:75-78,HDWA:123-126,RKIS:156-159,RWYP:227-230,HLYL:334-337,HIFS:341-344,RAIT:361-364,RQLE:402-405,HELG:408-411,HLIF:455-458,RSMI:467-470,RELN:503-506,KLLA:575-578,KVFA:633-636,HPFV:641-644,RYYL:682-685,HILP:698-701,KSLG:731-734,KAFS:850-853	1	0	0	SignalP3NN:22,SignalP4:22,SignalP5:22,DeepSig:22,Phobius:22,SignalP6:22	1	0
XPS69769.1	0.479	-1.551	3.286	.	.	.	.	0	0	0	PF02983,PF00089	Domain:Pro_Al_protease,Domain:Trypsin	0	.	0	0	0.013	.	.	0.723	0.024	0.405	0.73	1	1	0	0	38103.3	376	-9.5	4.564	6	180	247	124	28	216	62	27	35	0.514	AMKR:[LIJVAP]X[KRTPEI]R:35-38,KR:[KR]R:37-38,LGKR:[LIJVAP]X[KRTPEI]R&LXXR:128-131,KR:[KR]R:130-131,LINR:LXXR:198-201	RDLG:38-41,RELK:53-56,KPLV:101-104,KALD:117-120,RALG:302-305	0	0	0	SignalP3NN:19,SignalP3HMM:19,SignalP4:19,SignalP5:19,DeepSig:19,Phobius:19,SignalP6:19	1	1
XPS68010.1	0.477	3.959	3.312	.	.	.	.	0	0	0	.	.	0	.	0	0.35	0.554	0.863	.	.	0.974	0.446	0.35	1	1	0	0	9219.7	83	-1.5	5.532	1	24	44	29	7	45	20	10	10	1	AHER:[LIJVAP]X[KRTPEI]R:25-28	RAID:28-31,KPMH:41-44	0	0	0	SignalP3NN:19,SignalP4:19,SignalP5:19,DeepSig:19,SignalP3HMM:21,Phobius:21,SignalP6:28	1	1
XPS74938.1	0.476	0.136	3.265	MoCDIP10	.	.	.	0	0	0	PF13668	Domain:Ferritin_2	0	.	0	0.001	0.032	.	.	0.877	0.013	0.568	0.58	1	1	0	0	32533.1	319	-5	4.839	4	134	201	123	23	199	43	20	23	0.514	LHAR:LXXR:25-28,AFIR:[LIJVAP]X[KRTPEI]R:189-192,LQPR:[LIJVAP]X[KRTPEI]R&LXXR:208-211	KGLF:9-12,KALG:91-94,KSLM:101-104,RVLE:151-154	0	0	0	SignalP3NN:20,SignalP4:20,DeepSig:20,Phobius:20,SignalP3HMM:27,SignalP6:28	1	1
XPS73258.1	0.472	-1.959	3.242	.	.	.	.	0	0	0	PF01565,PF08031	Domain:FAD_binding_4,Domain:BBE	0	AA7	0	0	0.01	.	.	0.935	0.937	0.493	0.87	1	1	0	0	65727.7	610	-5	5.955	12	230	368	175	72	347	111	57	54	0.752	ATIR:[LIJVAP]X[KRTPEI]R:74-77,LTER:[LIJVAP]X[KRTPEI]R&LXXR:392-395,LALR:LXXR:448-451,RR:[KR]R:521-522,KR:[KR]R:565-566,LWCR:LXXR:577-580	RVLF:6-9,HQIA:140-143,HDIR:152-155,HSYT:163-166,RSIG:168-171,HNLR:180-183,KVIV:225-228,HGYL:246-249,HVFA:314-317,RLLS:433-436,HMIA:474-477,RALA:532-535	1	0	0	SignalP5:20,SignalP6:20,SignalP3NN:23,SignalP4:23,Phobius:25	1	0
XPS81209.1	0.472	-1.455	3.31	.	.	.	.	0	0	0	PF01822,PF00141	Domain:WSC,Domain:peroxidase	0	AA2	0	0	0.011	.	.	0.764	0.951	0.236	0.82	1	1	0	0	105003	991	-20.5	4.69	38	422	654	249	99	537	178	81	97	0.827	RR:[KR]R:264-265,APTR:[LIJVAP]X[KRTPEI]R:670-673,LNPR:[LIJVAP]X[KRTPEI]R&LXXR:786-789	RGFA:46-49,HDMA:75-78,HTLG:197-200,KAYR:251-254,RRIF:264-267,KAMQ:276-279,KMID:294-297,KPYR:315-318,KPFF:525-528,RALL:570-573,KFFG:595-598,RALS:673-676,KTLC:735-738,RPLS:789-792,RVLT:893-896,HYFG:918-921,KQFC:955-958	0	0	0	SignalP3NN:22,SignalP3HMM:22,SignalP4:22,SignalP5:22,DeepSig:22,Phobius:22,SignalP6:22	1	1
XPS79848.1	0.472	-1.264	3.121	.	.	.	.	0	0	0	PF07519	Family:Tannase	0	.	0	0	0.013	.	.	0.543	0.038	0.307	0.86	1	1	0	0	58283.8	536	-10	4.955	13	197	322	142	73	294	103	49	54	1.122	VYPR:[LIJVAP]X[KRTPEI]R:323-326,KR:[KR]R:515-516	RYLS:109-112,RALY:165-168,KQIT:175-178,KDFY:179-182,KSYY:188-191,KILH:398-401,RYYE:417-420,RFFT:438-441,HAIG:455-458	0	0	0	SignalP3HMM:16,SignalP5:16,DeepSig:16,Phobius:16,SignalP6:16,SignalP3NN:21,SignalP4:21	1	1
XPS80253.1	0.472	-0.89	3.213	.	.	.	.	0	0	0	PF07519	Family:Tannase	0	.	0	0	0.068	.	.	0.54	0.031	0.258	0.82	1	1	0	0	58307.9	540	-14.5	4.69	10	197	319	145	80	319	88	40	48	0.957	LRQR:LXXR:508-511	HALN:16-19,RFLA:96-99,KEIT:164-167,KGLG:347-350,KILS:387-390,HGMA:392-395,RSLK:413-416,KYFL:427-430,KAMM:478-481,RPIC:511-514,KSLF:537-540	0	0	0	SignalP3NN:17,SignalP3HMM:17,SignalP4:17,SignalP5:17,DeepSig:17,Phobius:17,SignalP6:17	1	1
XPS79692.1	0.471	-1.548	3.308	.	.	.	.	0	0	0	.	.	0	.	0	0	0.029	.	.	0.836	0.943	0.708	0.8	1	1	0	0	63239.4	634	8.5	7.816	15	320	499	129	58	353	64	39	25	0.442	.	KGYP:201-204,KELT:244-247,KIYS:326-329,KTYT:337-340,KGYP:510-513	1	0	0	SignalP3NN:16,SignalP4:16,SignalP5:16,SignalP6:16,Phobius:21	1	0
XPS78748.1	0.471	-1.904	3.109	.	.	.	.	0	0	0	PF00135	Domain:COesterase	0	.	0	0	0.019	.	.	0.872	0.861	0.385	0.55	1	1	0	0	59946.4	535	-3	6.018	4	156	275	144	75	300	110	56	54	1.157	IKPR:[LIJVAP]X[KRTPEI]R:107-110,LGLR:LXXR:181-184,KR:[KR]R:352-353,RR:[KR]R:362-363,KR:[KR]R:393-394,APRR:[LIJVAP]X[KRTPEI]R:406-409,RR:[KR]R:408-409,LAER:[LIJVAP]X[KRTPEI]R&LXXR:411-414,LVIR:[LIJVAP]X[KRTPEI]R&LXXR:473-476	RYLA:34-37,KPII:151-154,KHIS:195-198,RNLT:260-263,HVID:298-301,KRWN:352-355,RRIL:362-365,RTWP:383-386,KRYQ:393-396,RRLL:408-411,HVYS:421-424,RMWT:476-479,HGLS:490-493,RSYI:514-517	0	0	0	SignalP6:15,SignalP3NN:20,SignalP3HMM:20,SignalP4:20,SignalP5:20,DeepSig:20,Phobius:20	1	1
XPS69022.1	0.471	-2.376	2.896	.	.	.	.	0	0	0	PF00728,PF14845	Domain:Glyco_hydro_20,Domain:Glycohydro_20b2	0	GH20	0	0	0.009	.	.	0.961	0.927	0.397	0.18	1	1	0	0	67170.3	598	-16.5	4.955	4	176	312	174	86	328	143	68	75	0.922	AGTR:[LIJVAP]X[KRTPEI]R:47-50,LHRR:[LIJVAP]X[KRTPEI]R&LXXR:58-61,RR:[KR]R:60-61,VDIR:[LIJVAP]X[KRTPEI]R:124-127,KR:[KR]R:223-224,LMPR:[LIJVAP]X[KRTPEI]R&LXXR:348-351,VWPR:[LIJVAP]X[KRTPEI]R:529-532,ASPR:[LIJVAP]X[KRTPEI]R:557-560,LRER:[LIJVAP]X[KRTPEI]R&LXXR:564-567	KLLL:5-8,KSYE:25-28,RRYT:60-63,RSWD:108-111,KYID:119-122,RLLV:127-130,RGLT:170-173,RGIN:206-209,RSFI:214-217,RQID:224-227,KFLD:339-342,KAYT:369-372,KALV:445-448,KYWY:452-455,HNWR:486-489,HMWG:514-517	0	0	0	SignalP3NN:19,SignalP3HMM:19,SignalP4:19,SignalP5:19,DeepSig:19,Phobius:19,SignalP6:19	1	1
XPS75083.1	0.47	-1.584	3.09	.	.	.	.	0	0	0	PF00135	Domain:COesterase	0	.	0	0	0.017	.	.	0.737	0.921	0.372	0.74	1	1	0	0	57102.6	540	2	7.498	7	206	336	169	61	325	71	37	34	0.842	PPER:[LIJVAP]X[KRTPEI]R:69-72,LDQR:LXXR:206-209,PSPR:[LIJVAP]X[KRTPEI]R:249-252,KR:[KR]R:375-376,LNYR:LXXR:537-540	HSLR:4-7,KQYF:110-113,KNIA:217-220,KQLL:242-245,RPFS:252-255,KSYV:298-301,KKWA:328-331,RVFL:345-348,RSIL:376-379,KTWA:476-479,KELG:500-503	0	1	0	SignalP3NN:24,SignalP3HMM:24,SignalP4:24,SignalP5:24,DeepSig:24,Phobius:24,SignalP6:24	1	1
XPS74992.1	0.469	-2.497	2.29	.	.	.	.	0	0	0	.	.	0	.	0	0	0.054	.	.	0.791	0.101	0.361	0.11	1	1	0	0	53970.6	478	-9	5.437	5	130	258	132	64	252	131	65	66	1.209	KR:[KR]R:361-362,IIRR:[LIJVAP]X[KRTPEI]R:372-375,RR:[KR]R:374-375,RR:[KR]R:424-425	RALP:20-23,RLIE:76-79,HEMY:105-108,HNMG:140-143,KTYR:180-183,HYFF:188-191,KDFW:213-216,RYMS:232-235,KNLR:250-253,RAMR:271-274,KEIY:324-327,RSIK:336-339,HLFF:347-350,RSYH:375-378,RDLP:399-402,RRMA:424-427,KKYV:433-436	0	0	0	SignalP3NN:21,SignalP3HMM:21,SignalP4:21,SignalP5:21,DeepSig:21,Phobius:21,SignalP6:21	1	1
XPS78493.1	0.469	1.38	3.298	.	.	.	.	0	0	0	PF00686,PF03067	Family:CBM_20,Domain:LPMO_10	0	AA13,CBM20	0	0	0.125	.	0.734	.	0.946	0.368	0.95	1	1	0	0	40828.5	386	3	7.35	16	170	261	101	40	211	57	31	26	0.796	PGPR:[LIJVAP]X[KRTPEI]R:78-81,LSFR:LXXR:225-228	HGYL:18-21,KFLT:125-128,KGFQ:181-184,HTLL:222-225,KFIK:349-352,RAYT:367-370	0	0	0	SignalP3NN:17,SignalP3HMM:17,SignalP5:17,Phobius:17,SignalP6:17	1	1
XPS80368.1	0.469	0.403	2.767	.	.	.	.	0	0	0	.	.	0	.	0	0.037	0.44	.	.	0.633	0.406	0.181	0.69	1	1	0	0	33191	312	1.5	7.164	5	108	181	105	29	188	47	25	22	0.95	LLVR:LXXR:15-18,LNER:[LIJVAP]X[KRTPEI]R&LXXR:57-60,ADIR:[LIJVAP]X[KRTPEI]R:96-99,PKPR:[LIJVAP]X[KRTPEI]R:217-220	RLLY:4-7,RTMS:35-38,KVIQ:52-55,RFIF:60-63,HFLN:249-252,HGFS:289-292	0	0	0	SignalP3NN:21,SignalP3HMM:21,SignalP4:21,SignalP5:21,DeepSig:21,Phobius:21,SignalP6:21	1	1
XPS71386.1	0.468	-0.189	-2.489	.	.	.	.	0	0	0	PF01124	Family:MAPEG	0	.	0	0.976	0.783	.	0.638	.	0.951	0.438	0.61	0	1	0	1	16563.1	149	8	9.939	0	49	80	54	24	93	25	17	8	1.378	RR:[KR]R:42-43	HAYA:21-24,KGFW:33-36,KNIP:49-52,RALY:104-107,RSLV:123-126,KVLA:144-147	0	0	0	SignalP3NN:24,SignalP3HMM:24,SignalP6:24	1	1
XPS69285.1	0.468	0.647	3.244	.	.	.	.	0	0	0	PF01328	Family:Peroxidase_2	0	.	0	0	0.372	.	.	0.622	0.992	0.607	0.7	1	1	0	0	45333	425	0.5	6.605	3	144	256	127	50	258	68	36	32	0.798	LQKR:[LIJVAP]X[KRTPEI]R&LXXR:29-32,KR:[KR]R:31-32,PPPR:[LIJVAP]X[KRTPEI]R:35-38,LYKR:[LIJVAP]X[KRTPEI]R&LXXR:196-199,KR:[KR]R:198-199,KR:[KR]R:293-294	RFIT:2-5,RQLQ:27-30,HEFQ:71-74,HNFI:94-97,KGLG:110-113,RSWE:191-194,HNFV:240-243,HFMS:245-248,KSFF:265-268,RPLA:294-297	0	0	0	SignalP3NN:18,SignalP3HMM:18,SignalP4:18,SignalP5:18,DeepSig:18,Phobius:18,SignalP6:18	1	1
XPS73133.1	0.468	-0.598	3.151	.	.	.	.	0	0	0	PF00026	Family:Asp	0	.	0	0	0.17	.	.	0.6	0.01	0.376	0.73	1	1	0	0	46697.9	444	2	7.639	4	176	275	152	43	271	63	33	30	0.803	LDRR:[LIJVAP]X[KRTPEI]R&LXXR:18-21,RR:[KR]R:20-21,LTDR:LXXR:28-31,RR:[KR]R:56-57,KR:[KR]R:65-66,LGGR:LXXR:81-84,LGNR:LXXR:92-95,LPDR:LXXR:333-336,LMNR:LXXR:385-388,VARR:[LIJVAP]X[KRTPEI]R:440-443,RR:[KR]R:442-443	HALA:14-17,RRLP:20-23,RVLN:31-34,KKMK:62-65,RVYM:84-87,RVYA:95-98,RSYK:142-145,KGIL:164-167,KTYF:376-379	0	0	1	SignalP3NN:17,SignalP3HMM:17,SignalP4:17,SignalP5:17,DeepSig:17,Phobius:17,SignalP6:17	1	1
XPS80352.1	0.468	-0.747	3.234	.	.	.	.	0	0	0	PF00026	Family:Asp	0	.	0	0	0.181	.	.	0.724	0.121	0.497	0.62	1	1	0	0	44329.2	413	1.5	7.184	4	141	247	125	44	243	69	36	33	0.893	LGSR:LXXR:155-158,LWER:[LIJVAP]X[KRTPEI]R&LXXR:182-185,AKIR:[LIJVAP]X[KRTPEI]R:334-337,LELR:LXXR:396-399	RGIF:150-153,KKYS:195-198,KQLT:263-266,KKMC:362-365,RLLG:377-380	1	0	0	SignalP5:21,SignalP3NN:24,SignalP4:24,DeepSig:24,Phobius:24	1	0
XPS75100.1	0.461	-1.39	3.244	.	.	.	.	0	0	0	.	.	0	.	0	0.004	0.027	.	.	0.713	0.547	0.506	0.48	1	1	0	0	23180.3	228	2	8.94	1	80	155	98	11	165	12	7	5	0.341	LPAR:LXXR:214-217	.	0	0	0	SignalP3NN:19,SignalP3HMM:19,SignalP4:19,SignalP5:19,DeepSig:19,Phobius:19,SignalP6:19	1	1
XPS77621.1	0.459	0.3	2.188	.	.	.	.	0	0	0	PF11578	Family:DUF3237	0	.	0	0.43	0.473	.	.	0.64	0.086	0.245	0.62	1	1	0	0	18966.6	171	-1	5.718	3	57	91	55	19	97	34	17	17	1	ADTR:[LIJVAP]X[KRTPEI]R:92-95,LHLR:LXXR:120-123,LLQR:LXXR:144-147	RIFT:43-46,KGLR:51-54,RQLD:114-117,KKYY:131-134	0	0	0	SignalP3NN:20,SignalP3HMM:20,SignalP4:20,SignalP5:20,DeepSig:20,Phobius:20,SignalP6:20	1	1
XPS78839.1	0.459	0.945	3.309	.	.	.	.	0	0	0	.	.	0	.	0	0	0.078	.	0.505	.	0.47	0.428	0.85	1	1	0	0	43914	450	-17	4.002	7	207	328	154	10	251	53	18	35	0.562	AGTR:[LIJVAP]X[KRTPEI]R:398-401,KR:[KR]R:441-442,AMRR:[LIJVAP]X[KRTPEI]R:443-446,RR:[KR]R:445-446	KALL:4-7,RGIT:115-118,RAMR:442-445,RGLR:446-449	1	0	0	SignalP3NN:17,SignalP3HMM:17,SignalP4:17,SignalP5:17,DeepSig:17,Phobius:17,SignalP6:17	1	1
XPS77905.1	0.457	-1.186	3.26	.	.	.	.	0	0	0	.	.	0	.	0	0.25	0.066	.	.	0.821	0.63	0.288	0.71	1	1	0	0	8655.32	85	6	10.745	4	39	56	34	2	56	8	7	1	0.226	PSPR:[LIJVAP]X[KRTPEI]R:29-32,ACTR:[LIJVAP]X[KRTPEI]R:51-54	RQMV:42-45,RPLP:63-66	0	0	0	SignalP3NN:18,SignalP3HMM:18,SignalP4:18,SignalP5:18,DeepSig:18,Phobius:18	1	1
XPS75966.1	0.454	-4.963	-1.3	.	.	.	.	0	0	0	PF00491	Domain:Arginase	0	.	0	0.003	0.181	.	.	0.598	0.122	0.334	0.1	0	0	0	0	34830.8	324	-9	4.983	2	105	177	110	28	188	88	42	46	0.716	LPTR:[LIJVAP]X[KRTPEI]R&LXXR:12-15,KR:[KR]R:82-83,LTLR:LXXR:269-272	KFLP:10-13,KELE:48-51,HNYA:65-68,RGMK:79-82,HSIA:115-118,RAMR:127-130,REIA:135-138,HGMP:160-163,HHML:185-188,KKLV:191-194,RDID:199-202,KKIL:206-209,HGIK:212-215,HGIG:225-228,KVMD:229-232	1	0	0	.	0	0
XPS76922.1	0.449	-1.543	3.3	.	.	.	.	0	0	0	.	.	0	.	0	0	0.029	.	.	0.831	0.947	0.37	0.69	1	1	0	0	27411.4	274	-15.5	4.067	4	123	193	91	18	163	41	14	27	0.366	PHRR:[LIJVAP]X[KRTPEI]R:34-37,RR:[KR]R:36-37	KSFC:2-5	0	0	0	SignalP3NN:16,SignalP3HMM:16,SignalP4:16,SignalP5:16,DeepSig:16,SignalP6:16,Phobius:18	1	1
XPS73670.1	0.448	-1.291	3.175	.	.	.	.	0	0	0	.	.	0	.	0	0	0.004	.	.	0.634	0.993	0.567	0.71	1	1	0	0	19930.3	195	-4.5	4.422	1	98	142	62	11	98	24	10	14	0.596	LVPR:[LIJVAP]X[KRTPEI]R&LXXR:31-34	RYIA:6-9,RDLV:29-32,KSYS:36-39,KSFE:168-171	0	0	0	SignalP3NN:20,SignalP3HMM:20,SignalP4:20,SignalP5:20,DeepSig:20,Phobius:20,SignalP6:20	1	1
XPS72384.1	0.447	-1.355	-2.232	.	.	.	.	0	0	0	.	.	0	.	0	0.999	0.495	0.613	.	.	0.984	0.447	0.35	0	1	0	1	10966	99	9.5	11.489	1	27	45	40	8	59	25	18	7	0.952	LRKR:[LIJVAP]X[KRTPEI]R&LXXR:84-87,KR:[KR]R:86-87	KRLR:86-89	0	0	0	SignalP3NN:17,SignalP3HMM:17,SignalP4:17,SignalP5:17,Phobius:17	1	1
XPS78580.1	0.447	-1.548	3.254	.	.	.	.	0	0	0	.	.	0	PL1_2,PL1	0	0	0.051	.	.	0.852	0.864	0.511	0.55	1	1	0	0	88738.4	833	-12	5.261	3	326	507	231	89	440	182	89	93	0.896	LHGR:LXXR:21-24,LGER:[LIJVAP]X[KRTPEI]R&LXXR:102-105,LDIR:[LIJVAP]X[KRTPEI]R&LXXR:534-537,AYKR:[LIJVAP]X[KRTPEI]R:652-655,KR:[KR]R:654-655,KR:[KR]R:672-673,KR:[KR]R:712-713	KSIF:2-5,RIIT:97-100,HSIL:138-141,RAFL:209-212,KTIL:283-286,RIFT:311-314,KVLH:339-342,KGIV:399-402,RHIR:419-422,HAIF:443-446,RNMI:471-474,KNYP:484-487,HGFA:492-495,HNLI:507-510,RSWS:516-519,KPFF:637-640,RVLS:655-658,KRII:672-675,KGII:693-696,HAFV:751-754,RSFG:819-822	0	0	0	SignalP3NN:16,SignalP3HMM:16,SignalP4:16,SignalP5:16,DeepSig:16,Phobius:23,SignalP6:23	1	1
XPS70385.1	0.447	-1.281	3.238	.	.	.	.	0	0	0	PF07731,PF07732,PF00394	Domain:Cu-oxidase_2,Domain:Cu-oxidase_3,Domain:Cu-oxidase	0	AA1,AA1_3,AA1_2,AA1_1	0	0	0.012	.	.	0.596	0.056	0.545	0.1	1	1	0	0	68957.3	617	3	6.763	1	184	328	151	88	312	161	87	74	1.213	VEPR:[LIJVAP]X[KRTPEI]R:237-240,KR:[KR]R:431-432	KWLS:23-26,KQIF:30-33,KDYY:140-143,RTLW:151-154,KQYN:202-205,RKYR:240-243,RFLD:245-248,RAFK:253-256,KAIP:264-267,HVIG:269-272,KNIT:307-310,KVMQ:328-331,RSFK:365-368,RILA:389-392,HNLI:472-475,HDMM:479-482,KFID:500-503,KAFI:521-524,KALE:545-548	1	0	0	SignalP3NN:19,SignalP3HMM:19,SignalP4:19,SignalP5:19,DeepSig:19,Phobius:19,SignalP6:19	1	1
XPS76974.1	0.444	0.423	3.113	.	.	.	.	0	0	0	.	.	0	.	0	0.785	0.146	.	.	0.518	0.949	0.408	0.76	1	1	0	0	29443.9	302	-28.5	3.645	0	137	230	107	9	160	54	13	41	0.678	LKVR:LXXR:21-24,AAER:[LIJVAP]X[KRTPEI]R:214-217	KVLK:113-116	0	0	0	SignalP3NN:17,SignalP3HMM:17,SignalP4:17,SignalP5:17,DeepSig:17,Phobius:19,SignalP6:24	1	1
XPS77650.1	0.444	6.175	3.297	.	.	.	.	0	0	0	.	.	0	.	0	1	0.88	.	0.867	.	0.724	0.26	0.66	1	1	0	0	6444.51	59	-0.5	5.553	6	21	39	21	8	41	10	5	5	1	.	RWIL:10-13	0	0	0	SignalP3NN:24	1	0
XPS73485.1	0.444	-1.279	2.582	.	.	.	.	0	0	0	.	.	0	GH43_21,GH43_22,GH43_18,GH43_34,GH43_20,GH43_19,GH43,GH43_23,GH159	0	0	0.101	.	.	0.56	0.672	0.577	0.69	1	1	0	0	36524.1	330	-12	4.401	0	121	199	89	51	176	64	27	37	1.027	VDRR:[LIJVAP]X[KRTPEI]R:23-26,RR:[KR]R:25-26,ATRR:[LIJVAP]X[KRTPEI]R:110-113,RR:[KR]R:112-113	RQIA:26-29,RGIV:116-119,RFYD:166-169,KDFA:190-193,RFIK:224-227,HIFL:276-279,KTWT:294-297	0	0	0	SignalP3NN:20,SignalP3HMM:20,SignalP4:20,SignalP5:20,DeepSig:20,Phobius:20,SignalP6:26	1	1
XPS76019.1	0.442	-1.047	2.728	.	.	.	.	0	0	0	PF00150	Domain:Cellulase	0	GH5_23,GH5_9,GH5,GH5_54,GH5_15,GH5_46,GH5_22,GH5_49,GH5_44,GH5_45,GH5_50,GH5_33	0	0	0.159	.	.	0.596	0.099	0.293	0.76	1	1	0	0	49332.4	452	-1	6.357	6	161	257	133	68	258	67	36	31	1.23	LEER:[LIJVAP]X[KRTPEI]R&LXXR:144-147,LDSR:LXXR:307-310	HDLS:80-83,KTFK:94-97,KTIS:195-198,HIII:208-211,HSLP:214-217,KKIA:302-305,HVYY:340-343,KALF:392-395,REYW:429-432	1	1	0	SignalP3NN:18,SignalP3HMM:18,SignalP4:18,SignalP5:18,DeepSig:18,Phobius:18,SignalP6:18	1	1
XPS79934.1	0.441	0.549	3.308	CfTom1	.	.	.	0	0	0	PF00331,PF00734	Domain:Glyco_hydro_10,Domain:CBM_1	1	GH10,CBM1	0	0	0.01	.	.	0.751	0.846	0.484	0.79	1	1	0	0	49290.2	474	-13.5	4.529	10	207	314	159	44	275	87	38	49	0.719	.	KTWN:49-52,KKYI:187-190,KLIR:250-253,KLIG:286-289,KVYA:294-297,KLYI:340-343,KAMV:357-360,KALC:396-399,KALA:471-474	0	0	0	SignalP3NN:23,SignalP3HMM:23,SignalP4:23,SignalP5:23,DeepSig:23,Phobius:23,SignalP6:23	1	1
XPS78616.1	0.439	-2.043	3.247	.	.	.	.	0	0	0	PF01565,PF08031	Domain:FAD_binding_4,Domain:BBE	0	AA7	0	0	0.01	.	.	0.902	0.076	0.457	0.79	1	1	0	0	71580.5	657	-3	6.025	7	233	385	190	86	369	124	63	61	1.045	LSRR:[LIJVAP]X[KRTPEI]R&LXXR:93-96,RR:[KR]R:95-96,LNLR:LXXR:216-219,KR:[KR]R:398-399	HSLF:6-9,RDIS:65-68,KAFP:101-104,RNYP:107-110,KPLV:111-114,RNLN:214-217,HDYI:227-230,HNLK:244-247,RFIT:332-335,KRFP:398-401,HTIE:433-436,KPFF:443-446,KTLN:450-453,RLFP:489-492,KSLW:493-496,KHYP:609-612,KLLE:613-616,RGLF:624-627	0	0	0	SignalP3NN:19,SignalP3HMM:19,SignalP5:19,DeepSig:19,SignalP4:24,Phobius:24	1	1
XPS75676.1	0.437	1.207	0.702	.	.	.	.	0	0	0	.	.	0	.	0	0.711	0.49	0.518	.	.	0.923	0.39	0.69	1	1	1	0	16587.9	156	-2	4.828	0	62	94	57	13	89	28	13	15	0.85	.	KAME:46-49,RILT:87-90,KNYI:106-109,KSLG:135-138	0	0	0	SignalP3NN:17,SignalP3HMM:17,SignalP4:17,SignalP5:17,DeepSig:17,Phobius:17,SignalP6:17	1	1
XPS74355.1	0.434	-0.913	2.104	.	.	.	.	0	0	0	.	.	0	.	0	0.984	0.257	.	.	0.876	0.017	0.295	0.43	1	1	0	0	10057.8	92	7.5	11.612	2	31	51	32	8	54	18	14	4	0.217	PPER:[LIJVAP]X[KRTPEI]R:73-76,LQWR:LXXR:85-88	HHLQ:18-21,RLMV:28-31,RPLP:70-73	0	0	0	SignalP3NN:16,SignalP3HMM:16,SignalP4:16,Phobius:16	1	1
XPS77842.1	0.433	0.176	3.309	UvSCRE1,MoCDIP7	.	.	.	0	0	0	.	.	0	.	0	0	0.059	.	.	0.934	0.035	0.487	0.79	1	1	0	0	79058	814	-35.5	3.909	4	460	649	214	59	448	79	23	56	0.304	RR:[KR]R:27-28	RQYG:28-31,KTFY:359-362,KEIV:648-651	0	0	0	SignalP5:17,SignalP3NN:20,SignalP3HMM:20,SignalP4:20,DeepSig:20,Phobius:20,SignalP6:20	1	1
XPS78517.1	0.433	-1.622	3.272	.	.	.	.	0	0	0	PF07519	Family:Tannase	0	.	0	0	0.009	.	.	0.776	0.502	0.195	0.79	1	1	0	0	53787.6	509	-15.5	4.405	13	204	323	162	57	316	78	33	45	0.614	VVPR:[LIJVAP]X[KRTPEI]R:465-468,KR:[KR]R:482-483	KVWL:76-79,KQMT:161-164,KPIS:170-173,KSYW:174-177,HKLG:225-228,HRLF:345-348,KIIT:396-399,HGMA:401-404,RSIP:406-409,RVLA:419-422,RVYL:432-435,RVLA:468-471,RELC:483-486	0	0	0	SignalP4:17,SignalP3HMM:21,SignalP5:21,DeepSig:21,SignalP6:22,SignalP3NN:25,Phobius:29	1	1
XPS67892.1	0.433	-0.523	3.294	.	.	.	.	0	0	0	PF00026	Family:Asp	0	.	0	0	0.091	.	.	0.547	0.975	0.65	0.91	1	1	0	0	49642.3	472	-15	4.255	4	184	297	147	44	269	66	26	40	0.905	LAPR:[LIJVAP]X[KRTPEI]R&LXXR:20-23,IQRR:[LIJVAP]X[KRTPEI]R:33-36,RR:[KR]R:35-36,LRRR:[LIJVAP]X[KRTPEI]R&LXXR:47-50,RR:[KR]R:48-49	.	1	0	0	SignalP3NN:17,SignalP4:17,Phobius:17,SignalP6:17	1	0
XPS79130.1	0.432	0.786	2.672	.	.	.	.	0	0	0	PF01738	Domain:DLH	0	.	0	0.476	0.508	.	.	0.78	0.742	0.337	0.44	1	1	0	0	27880.7	261	-2.5	5.854	2	91	143	96	29	157	43	22	21	0.9	LEVR:LXXR:26-29	HSYP:48-51,KAII:59-62,KLLA:76-79,RALH:115-118,HELG:136-139,KYIG:153-156,RWLK:157-160,HGFA:229-232	0	0	0	SignalP3NN:19,SignalP3HMM:19,SignalP4:19,SignalP5:19,DeepSig:19,Phobius:19,SignalP6:19	1	1
XPS78490.1	0.43	5.344	3.081	.	.	.	.	0	0	0	.	.	0	.	0	0.938	0.812	.	0.709	.	0.049	0.411	0.68	1	1	0	0	7838.95	71	4.5	8.53	4	29	42	19	8	35	16	11	5	0.786	AIRR:[LIJVAP]X[KRTPEI]R:22-25,RR:[KR]R:24-25	RSFE:42-45,RSWP:49-52,KPFT:60-63	0	0	0	SignalP3HMM:22,DeepSig:22	0	1
XPS73275.1	0.43	0.568	1.218	.	.	.	.	0	0	0	PF20238	Domain:DUF6595	0	.	0	0.098	0.41	.	0.598	.	0.016	0.423	0.72	1	1	0	0	23267.9	226	-8	4.351	4	98	140	75	18	130	30	12	18	0.639	.	KLLQ:21-24,KPMV:209-212	0	0	0	SignalP3HMM:17,Phobius:17,SignalP3NN:18,SignalP4:18,SignalP5:18,DeepSig:18,SignalP6:18	1	1
XPS71785.1	0.43	0.992	3.22	.	.	.	.	0	0	0	PF12697	Domain:Abhydrolase_6	0	.	0	0	0.085	.	0.505	.	0.976	0.39	0.78	1	1	0	0	47448.1	443	-10.5	4.671	6	163	261	136	61	264	62	28	34	0.982	.	KAFT:6-9,RNYT:61-64,KCIS:76-79,HGIG:100-103,KTYW:106-109,KKLR:165-168,KVIH:181-184,HSFG:187-190,HGLN:417-420	0	0	0	SignalP3NN:19,SignalP3HMM:19,SignalP4:19,Phobius:19	1	1
XPS68610.1	0.429	-1.273	2.928	.	.	.	.	0	0	0	PF00085,PF13848	Domain:Thioredoxin,Domain:Thioredoxin_6	0	.	0	0	0.01	.	.	0.51	0.624	0.482	0.37	1	1	0	0	57382.3	535	-32	4.32	8	182	305	181	54	295	147	59	88	0.957	PEER:[LIJVAP]X[KRTPEI]R:254-257	KEFV:30-33,KALA:52-55,KDIK:68-71,KVFR:96-99,KSFD:198-201,KSFA:217-220,KDLK:262-265,KDIG:324-327,KFLD:332-335,KNYK:361-364,KALA:387-390,KLFA:432-435,RTIE:449-452	0	0	0	DeepSig:17,SignalP6:17,SignalP3NN:19,SignalP3HMM:19,SignalP4:19,SignalP5:19,Phobius:19	1	1
XPS68867.1	0.429	-0.387	3.292	.	.	.	.	0	0	0	.	.	0	.	0	0	0.106	.	.	0.518	0.933	0.521	0.55	1	1	0	0	45124.8	419	26.5	10.327	7	146	240	118	34	230	95	62	33	0.897	RR:[KR]R:136-137,APER:[LIJVAP]X[KRTPEI]R:168-171,LIPR:[LIJVAP]X[KRTPEI]R&LXXR:212-215,PNRR:[LIJVAP]X[KRTPEI]R:256-259,RR:[KR]R:258-259,KR:[KR]R:379-380	HQLE:67-70,RDFE:86-89,KCIV:98-101,RTIA:137-140,RDFF:202-205,RKLI:210-213,RRIS:258-261,RNMA:266-269,KLWS:320-323,KNLR:357-360,RNLK:380-383	1	0	0	SignalP3NN:18,SignalP3HMM:18,SignalP4:18,SignalP5:18,DeepSig:18,Phobius:18,SignalP6:18	1	1
XPS75224.1	0.425	-1.688	3.07	.	.	.	.	0	0	0	.	.	0	.	0	0	0.064	.	.	0.848	0.708	0.281	0.7	1	1	0	0	48763.9	430	11.5	8.703	5	124	233	115	63	232	96	57	39	1.14	RR:[KR]R:364-365,PDTR:[LIJVAP]X[KRTPEI]R:386-389,KR:[KR]R:392-393	HVLA:4-7,RTYA:65-68,RTFL:79-82,KGYS:112-115,RIWQ:138-141,RALH:142-145,RIID:184-187,KQIE:227-230,KLFA:250-253,HDMQ:258-261,RFWR:279-282,RYLV:341-344,RKLK:389-392,RLMF:393-396,KNLL:427-430	0	0	0	SignalP3NN:20,SignalP3HMM:20,SignalP4:20,SignalP5:20,DeepSig:20,Phobius:20,SignalP6:20	1	1
XPS80342.1	0.425	0.953	3.304	FoSep1	.	.	.	0	0	0	PF00082,PF05922	Domain:Peptidase_S8,Domain:Inhibitor_I9	0	.	0	0	0.064	.	.	0.7	0.893	0.473	0.77	1	1	0	0	43041.3	417	-1	6.339	0	179	268	150	42	244	72	38	34	0.744	ITER:[LIJVAP]X[KRTPEI]R:25-28,VHKR:[LIJVAP]X[KRTPEI]R:59-62,KR:[KR]R:61-62,KR:[KR]R:65-66	RNLA:5-8,KFIV:35-38,RSLK:62-65,KDWK:78-81,KALT:127-130,KVFH:224-227,KAIQ:272-275,KALG:391-394	0	0	0	SignalP3NN:20,SignalP3HMM:20,SignalP4:20,SignalP5:20,DeepSig:20,Phobius:20,SignalP6:20	1	1
XPS72635.1	0.422	-2.022	2.71	.	.	.	.	0	0	0	.	.	0	.	0	0	0.066	.	.	0.829	0.548	0.387	0.18	1	1	0	0	42689.1	383	-4	5.642	5	108	217	109	46	211	96	48	48	0.919	LPVR:LXXR:47-50,PVRR:[LIJVAP]X[KRTPEI]R:48-51,RR:[KR]R:50-51,LPNR:LXXR:56-59,PNRR:[LIJVAP]X[KRTPEI]R:57-60,RR:[KR]R:59-60,VETR:[LIJVAP]X[KRTPEI]R:268-271,VIRR:[LIJVAP]X[KRTPEI]R:273-276,RR:[KR]R:275-276	RSLD:106-109,HDFY:129-132,KSFD:166-169,KHYR:185-188,HQFS:233-236,KNLR:255-258,RALD:276-279,KGWE:281-284,HTFE:291-294,RAII:301-304,RKIV:365-368,HSLR:377-380	1	0	0	SignalP3NN:17,SignalP3HMM:17,SignalP4:17,SignalP5:17,DeepSig:17,Phobius:19	1	1
XPS70960.1	0.417	-1.079	3.3	.	.	.	.	0	0	0	.	.	0	.	0	0.191	0.045	.	.	0.681	0.037	0.36	0.72	1	1	0	0	28579.3	296	10	10.246	0	148	213	53	45	197	43	30	13	0.275	LERR:[LIJVAP]X[KRTPEI]R&LXXR:111-114,RR:[KR]R:113-114,LERR:[LIJVAP]X[KRTPEI]R&LXXR:199-202,RR:[KR]R:201-202	.	1	1	0	SignalP3NN:19,SignalP3HMM:19,SignalP4:19,SignalP5:19,DeepSig:19,Phobius:19,SignalP6:19	1	1
XPS79010.1	0.417	-1.61	2.227	.	.	.	.	0	0	0	PF03009	Family:GDPD	0	.	0	0	0.208	.	.	0.753	0.527	0.633	0.33	1	1	0	0	46199.2	418	-5.5	5.428	10	139	233	118	57	235	95	47	48	1	VLPR:[LIJVAP]X[KRTPEI]R:18-21,AARR:[LIJVAP]X[KRTPEI]R:97-100,RR:[KR]R:99-100,LVCR:LXXR:118-121,APER:[LIJVAP]X[KRTPEI]R:260-263,LDER:[LIJVAP]X[KRTPEI]R&LXXR:291-294,LAKR:[LIJVAP]X[KRTPEI]R&LXXR:311-314,KR:[KR]R:313-314	RSFV:2-5,HHYP:24-27,RPYF:46-49,HTYA:90-93,KQLV:116-119,KQYM:187-190,KLMT:207-210,KNIA:257-260,RVWP:263-266,KIMA:317-320,KVLD:387-390,KAMF:399-402	0	0	0	SignalP3NN:16,SignalP3HMM:16,SignalP4:16,SignalP5:16,DeepSig:16,Phobius:16,SignalP6:21	1	1
XPS74437.1	0.415	-1.481	3.225	.	.	.	.	0	0	0	.	.	0	.	0	0	0.142	.	.	0.928	0.021	0.45	0.43	1	1	0	0	43371.4	389	2.5	6.863	8	132	224	90	60	212	80	44	36	0.89	PAKR:[LIJVAP]X[KRTPEI]R:64-67,KR:[KR]R:66-67,PTIR:[LIJVAP]X[KRTPEI]R:197-200,KR:[KR]R:276-277,ITER:[LIJVAP]X[KRTPEI]R:290-293,RR:[KR]R:337-338	RHLL:4-7,KRYT:66-69,HHYS:80-83,KLFH:102-105,KYLL:163-166,HALA:281-284,HWMI:285-288,HMFS:303-306,RNLT:307-310,KLFF:342-345,REFE:381-384,RGLG:385-388	0	0	0	SignalP3HMM:19,SignalP4:19,SignalP5:19,DeepSig:19,Phobius:19,SignalP6:19,SignalP3NN:21	1	1
XPS73964.1	0.414	0.428	2.931	PpCBEL	.	.	.	0	0	0	PF14295,PF02018	Domain:PAN_4,Domain:CBM_4_9	0	CBM16,CBM61	0	0	0.024	.	.	0.631	0.274	0.344	0.81	1	1	0	0	49205.3	481	-2.5	5.254	18	241	353	128	38	251	47	23	24	0.713	LALR:LXXR:13-16,VTTR:[LIJVAP]X[KRTPEI]R:107-110	RSFS:147-150,RVFG:351-354,RGLV:430-433,KYIY:467-470	0	1	0	SignalP3NN:19,SignalP3HMM:19,SignalP4:19,SignalP5:19,DeepSig:19,Phobius:19,SignalP6:19	1	1
XPS67750.1	0.412	-2.681	2.51	.	.	.	.	0	0	0	PF00732,PF05199	Domain:GMC_oxred_N,Domain:GMC_oxred_C	0	AA3_2,AA3,AA3_3,AA3_1	0	0	0.009	.	.	0.93	0.946	0.375	0.39	1	1	0	0	71345.7	657	-14.5	4.813	3	224	378	186	68	357	129	60	69	0.882	KR:[KR]R:39-40,LANR:LXXR:76-79,AGPR:[LIJVAP]X[KRTPEI]R:93-96,LNNR:LXXR:129-132,LRGR:LXXR:137-140,RR:[KR]R:267-268,VDPR:[LIJVAP]X[KRTPEI]R:600-603,RR:[KR]R:655-656	RQIS:2-5,RSYE:101-104,KHLN:127-130,RTLQ:132-135,RTLG:140-143,KTFD:204-207,RIMH:286-289,RALG:316-319,RDIN:443-446,KPLV:512-515,KFLR:534-537	0	0	0	SignalP3NN:26,SignalP3HMM:26,SignalP4:26,SignalP5:26,DeepSig:26,Phobius:26,SignalP6:26	1	1
XPS70535.1	0.412	1.161	3.302	FoSep1	.	.	.	0	0	0	PF00082	Domain:Peptidase_S8	0	.	0	0	0.056	.	.	0.532	0.047	0.407	0.73	1	1	0	0	47913.4	463	-5.5	5.408	5	194	296	142	38	251	89	44	45	0.778	KR:[KR]R:244-245,VPER:[LIJVAP]X[KRTPEI]R:429-432	KEYI:40-43,KKYL:58-61,KVMV:84-87,KVLG:218-221,KKLL:388-391,KNYV:425-428	0	0	0	SignalP3NN:19,SignalP3HMM:19,SignalP4:19,SignalP5:19,DeepSig:19,Phobius:19,SignalP6:19	1	1
XPS77614.1	0.41	0.144	3.299	FoSep1	.	.	.	0	0	0	PF00082,PF17766,PF05922,PF02225	Domain:Peptidase_S8,Domain:fn3_6,Domain:Inhibitor_I9,Family:PA	0	.	0	0	0.011	.	.	0.909	0.809	0.262	0.74	1	1	0	0	84654.4	809	-8.5	5.463	9	329	518	256	78	458	147	73	74	0.763	RR:[KR]R:24-25,RR:[KR]R:38-39,RR:[KR]R:44-45,ICIR:[LIJVAP]X[KRTPEI]R:429-432,RR:[KR]R:556-557,RR:[KR]R:583-584,RR:[KR]R:708-709,VEPR:[LIJVAP]X[KRTPEI]R:736-739	RTYI:25-28,RSIT:39-42,RIIY:60-63,HVFD:67-70,RALL:82-85,KTYQ:97-100,RKLI:189-192,RYFS:195-198,RGMA:256-259,KGIF:323-326,RGFP:358-361,HVIP:469-472,KKYS:677-680,RELI:739-742,RDFT:750-753	0	0	1	SignalP3NN:20,SignalP3HMM:20,SignalP4:20,SignalP5:20,DeepSig:20,Phobius:20,SignalP6:20	1	1
XPS81298.1	0.407	-1.451	3.081	.	.	.	.	0	0	0	PF00246	Domain:Peptidase_M14	0	.	0	0	0.132	.	.	0.846	0.114	0.606	0.3	1	1	0	0	50800.6	451	3.5	6.761	4	135	237	113	75	237	119	67	52	1.02	PVPR:[LIJVAP]X[KRTPEI]R:24-27,LANR:LXXR:52-55,LNTR:[LIJVAP]X[KRTPEI]R&LXXR:85-88,AHIR:[LIJVAP]X[KRTPEI]R:96-99,LHKR:[LIJVAP]X[KRTPEI]R&LXXR:112-115,KR:[KR]R:114-115,KR:[KR]R:183-184,ASER:[LIJVAP]X[KRTPEI]R:372-375	HIYH:37-40,RDLA:50-53,HPIR:62-65,RSID:99-102,HALH:110-113,HPYA:128-131,HDLT:138-141,HAFP:142-145,KKFS:149-152,KSYE:155-158,RTIN:160-163,HLFG:166-169,REWI:198-201,RLWR:252-255,RNWK:275-278,RGLA:300-303,RSFI:328-331,HSYS:334-337,RMLE:357-360,RAIE:367-370,HSWT:407-410,KEIW:428-431	1	0	0	SignalP3NN:15,SignalP6:15,SignalP3HMM:17,SignalP4:17,SignalP5:17,DeepSig:17,Phobius:17	1	1
XPS71983.1	0.406	-1.567	3.11	.	.	.	.	0	0	0	.	.	0	.	0	0	0.008	.	.	0.721	0.93	0.51	0.72	1	1	0	0	35633.2	351	-16	4.015	2	158	238	131	27	219	48	16	32	0.565	ISER:[LIJVAP]X[KRTPEI]R:58-61,LVTR:[LIJVAP]X[KRTPEI]R&LXXR:67-70,VLRR:[LIJVAP]X[KRTPEI]R:229-232,RR:[KR]R:231-232	RGLT:2-5,RMFT:70-73,KFLN:153-156,KGLL:167-170,RRIN:231-234,KQIA:251-254,KIMK:345-348	0	0	0	SignalP3NN:21,SignalP3HMM:21,SignalP4:21,SignalP5:21,DeepSig:21,Phobius:21,SignalP6:21	1	1
XPS77681.1	0.406	0.411	3.31	PsPNPi,RsRlpA,VdAve1,PsShr1	.	.	.	0	0	0	PF03330	Domain:DPBB_1	1	.	0	0	0.01	.	.	0.802	0.783	0.487	0.7	1	1	0	0	29518.8	292	-13.5	4.004	4	143	214	91	23	173	37	12	25	0.388	PFKR:[LIJVAP]X[KRTPEI]R:20-23,KR:[KR]R:22-23	RDLI:23-26,KPLY:204-207,KKIN:239-242,HDID:264-267	0	0	0	SignalP3NN:18,SignalP3HMM:18,SignalP4:18,SignalP5:18,DeepSig:18,Phobius:18,SignalP6:18	1	1
XPS78677.1	0.405	1.674	3.309	.	.	.	.	0	0	0	.	.	0	.	0	0.892	0.455	.	.	0.694	0.167	0.188	0.39	1	1	0	0	13551.1	126	11.5	10.588	4	50	68	47	8	73	25	19	6	0.724	RR:[KR]R:50-51,AKRR:[LIJVAP]X[KRTPEI]R:65-68,KR:[KR]R:66-67,LVSR:LXXR:74-77,VDRR:[LIJVAP]X[KRTPEI]R:97-100,RR:[KR]R:99-100	RRMT:50-53,RSMA:54-57,HTMS:61-64,RHLA:68-71,RRFH:99-102,KCIY:103-106	1	1	1	Phobius:15,SignalP4:17,SignalP5:17,SignalP6:17,SignalP3NN:19,SignalP3HMM:19	1	1
XPS75572.1	0.402	-1.722	2.891	.	.	.	.	0	0	0	PF09423,PF16655	Domain:PhoD,Domain:PhoD_N	0	.	0	0	0.049	.	.	0.775	0.894	0.283	0.67	1	1	0	0	70969.5	627	-8.5	5.463	4	180	354	165	96	317	141	70	71	1.67	LNYR:LXXR:23-26,VVKR:[LIJVAP]X[KRTPEI]R:42-45,KR:[KR]R:44-45,LWTR:[LIJVAP]X[KRTPEI]R&LXXR:75-78,LPDR:LXXR:245-248,KR:[KR]R:258-259,LDTR:[LIJVAP]X[KRTPEI]R&LXXR:358-361,LYYR:LXXR:537-540,VVTR:[LIJVAP]X[KRTPEI]R:562-565	KNLN:21-24,KVYT:134-137,KNLK:150-153,REIF:248-251,KRLA:258-261,RKMN:318-321,RAYF:324-327,RIWR:342-345,RNYD:361-364,RSIT:365-368,HEIS:378-381,RSLM:386-389,RSLS:399-402,RVIG:412-415,RTLN:449-452,HLYS:453-456,KEYD:483-486,RGYF:540-543	0	0	0	SignalP3HMM:17,SignalP4:17,SignalP5:17,DeepSig:17,Phobius:17,SignalP6:17,SignalP3NN:20	1	1
XPS68982.1	0.402	-1.402	3.173	.	.	.	.	0	0	0	PF14683,PF14686	Domain:CBM-like,Domain:fn3_3	0	PL4_5,PL4,PL4_4,PL4_2,PL4_1,PL4_3	0	0	0.096	.	.	0.815	0.412	0.421	0.7	1	1	0	0	63250.2	568	2	6.841	1	183	320	147	83	295	135	71	64	1.205	LEER:[LIJVAP]X[KRTPEI]R&LXXR:21-24,AATR:[LIJVAP]X[KRTPEI]R:278-281,VVIR:[LIJVAP]X[KRTPEI]R:386-389,KR:[KR]R:408-409	KFLG:5-8,KSFF:29-32,KLWY:58-61,HALP:128-131,RTLW:137-140,KDYF:215-218,KVWG:261-264,KWYN:292-295,KAYQ:297-300,RLLL:308-311,KDFY:339-342,KDLK:397-400,KRIF:408-411,KPFE:430-433,KDWY:454-457,RLLE:527-530,RGWL:556-559	0	0	0	SignalP3NN:18,SignalP3HMM:18,SignalP4:18,SignalP5:18,DeepSig:18,Phobius:18,SignalP6:24	1	1
XPS80912.1	0.401	-1.834	3.203	.	.	.	.	0	0	0	PF00251,PF08244	Domain:Glyco_hydro_32N,Domain:Glyco_hydro_32C	0	GH32	0	0	0.009	.	.	0.798	0.065	0.311	0.75	1	1	0	0	63421.1	589	-27.5	4.154	1	213	354	158	75	325	91	34	57	0.963	VEIR:[LIJVAP]X[KRTPEI]R:261-264,ALTR:[LIJVAP]X[KRTPEI]R:311-314,VSRR:[LIJVAP]X[KRTPEI]R:581-584,RR:[KR]R:583-584	HLYY:90-93,KDLF:113-116,KVIW:206-209,HYLK:373-376,HPLF:479-482,RSII:508-511,RSMK:584-587	0	0	0	SignalP3NN:20,SignalP3HMM:20,SignalP4:20,SignalP5:20,DeepSig:20,SignalP6:20,Phobius:29	1	1
XPS78890.1	0.401	-1.868	3.257	.	.	.	.	0	0	0	PF03663	Repeat:Glyco_hydro_76	0	GH76	0	0	0.028	.	.	0.903	0.464	0.482	0.76	1	1	0	0	49192.6	451	-22	4.182	4	155	259	134	50	247	82	31	51	0.964	PTKR:[LIJVAP]X[KRTPEI]R:32-35,KR:[KR]R:34-35,LATR:[LIJVAP]X[KRTPEI]R&LXXR:85-88,KR:[KR]R:111-112,KR:[KR]R:113-114,LANR:LXXR:268-271	RVFA:88-91,KSLN:138-141,KAWP:233-236,KDYM:250-253,KALP:333-336,KGIF:378-381,RNLQ:383-386	1	0	0	SignalP3NN:22,SignalP3HMM:22,SignalP4:22,SignalP5:22,Phobius:22,SignalP6:22	1	1
XPS78878.1	0.399	0.441	2.952	.	.	.	.	0	0	0	.	.	0	.	0	0	0.027	0.541	.	.	0.917	0.635	0.16	1	1	0	0	69293.3	626	26	10.044	5	182	347	141	58	314	170	101	69	0.899	IARR:[LIJVAP]X[KRTPEI]R:60-63,RR:[KR]R:62-63,KR:[KR]R:158-159,LHNR:LXXR:259-262,KR:[KR]R:307-308,KR:[KR]R:338-339,LPGR:LXXR:366-369,LGQR:LXXR:425-428,IYKR:[LIJVAP]X[KRTPEI]R:429-432,KR:[KR]R:431-432,LAQR:LXXR:472-475,LEQR:LXXR:502-505,KR:[KR]R:516-517,LERR:[LIJVAP]X[KRTPEI]R&LXXR:523-526,RR:[KR]R:525-526,IPIR:[LIJVAP]X[KRTPEI]R:606-609	RSWE:2-5,HRFS:55-58,KSMF:198-201,HTMD:275-278,KSFF:283-286,RQWR:313-316,KRWP:338-341,KYLL:348-351,KKMP:392-395,RIYK:428-431,RWLT:475-478,RRIQ:525-528,KSLS:546-549,RPIT:602-605	1	0	0	SignalP3NN:21,SignalP4:21,SignalP5:21,DeepSig:21,Phobius:21,SignalP6:21	1	0
XPS74699.1	0.395	-2.847	-1.301	.	.	.	.	0	0	0	PF01965	Domain:DJ-1_PfpI	0	.	0	0.796	0.447	.	.	0.663	0.906	0.435	0.09	0	0	0	0	24526.8	227	-7	4.727	1	78	125	78	23	129	57	26	31	0.87	AGTR:[LIJVAP]X[KRTPEI]R:114-117,LAGR:LXXR:135-138,VKKR:[LIJVAP]X[KRTPEI]R:167-170,KR:[KR]R:169-170,RR:[KR]R:220-221	RTFG:40-43,KLLP:88-91,KELT:96-99,RQFT:103-106,RILQ:117-120,HHLG:143-146,KRWV:169-172,RIIN:182-185	0	0	0	.	0	0
XPS80509.1	0.395	-1.417	-1.286	.	.	.	.	0	0	0	PF13561	Domain:adh_short_C2	0	.	0	0.189	0.491	0.52	.	.	0.326	0.422	0.24	0	0	0	0	28799.6	265	-4.5	5.014	1	87	143	83	25	147	63	30	33	0.922	LFAR:LXXR:133-136	HLIQ:55-58,HAYQ:71-74,KEFG:92-95,KKMI:121-124,KWWI:140-143,RVLV:150-153,RSLA:183-186,KEWI:219-222,KDIP:223-226	0	0	0	.	0	0
XPS78458.1	0.393	-2.984	0.312	.	.	.	.	0	0	0	.	.	0	.	0	0.434	0.212	.	.	0.683	0.088	0.275	0.61	0	1	0	1	7737.07	75	3.5	9.223	2	30	47	31	6	51	12	8	4	0.615	RR:[KR]R:57-58	KPIK:67-70	0	0	0	Phobius:21,DeepSig:23,SignalP6:23,SignalP3NN:25,SignalP3HMM:25,SignalP4:25,SignalP5:25	1	1
XPS75052.1	0.392	4.261	3.137	.	.	.	.	0	0	0	.	.	0	.	0	0.94	0.545	0.787	.	.	0.83	0.576	0.13	1	1	0	0	11718.4	101	-2.5	5.48	2	25	42	28	20	60	26	13	13	1.227	.	RFFA:2-5,KAIL:6-9,HNYH:44-47,HDLP:48-51	0	0	0	SignalP3NN:19,SignalP3HMM:19,SignalP4:19,SignalP5:19,DeepSig:19,Phobius:19,SignalP6:19	1	1
XPS73590.1	0.389	-2.004	3.103	.	.	.	.	0	0	0	PF01565,PF08031	Domain:FAD_binding_4,Domain:BBE	0	AA7	0	0	0.01	.	.	0.894	0.893	0.347	0.19	1	1	0	0	67649.6	615	-8.5	5.364	6	212	348	166	81	327	134	66	68	0.97	LLTR:[LIJVAP]X[KRTPEI]R&LXXR:21-24,RR:[KR]R:24-25,LLSR:LXXR:86-89,LFPR:[LIJVAP]X[KRTPEI]R&LXXR:454-457,AAKR:[LIJVAP]X[KRTPEI]R:463-466,KR:[KR]R:465-466,LQIR:[LIJVAP]X[KRTPEI]R&LXXR:525-528	RDLN:25-28,KSLF:43-46,KVYP:61-64,RLLS:85-88,HDFL:189-192,HYMK:206-209,RSYL:358-361,KTLD:397-400,RLFP:453-456,RPLV:503-506,KDFQ:529-532,RDIS:540-543,RLLE:571-574	0	0	0	SignalP3NN:18,SignalP3HMM:18,SignalP4:18,SignalP5:18,DeepSig:18,Phobius:18,SignalP6:25	1	1
XPS79622.1	0.383	-0.307	3.204	.	.	.	.	0	0	0	PF04616	Family:Glyco_hydro_43	0	GH43_24,GH43_37,GH43,GH43_19,GH43_34,GH43_3,GH43_29,GH43_25,CBM35,GH43_2,GH43_30,GH43_10,GH43_22,GH43_18,GH43_33,GH43_32,GH43_8,GH43_4,GH43_11,GH43_12	0	0	0.139	.	.	0.521	0.983	0.742	0.77	1	1	0	0	47899.2	445	2	7.029	4	170	278	118	50	230	85	45	40	1.121	VIER:[LIJVAP]X[KRTPEI]R:98-101	RSII:2-5,KWYW:50-53,RVIE:97-100,KAYL:165-168,KKFA:243-246,KHLN:376-379,RLMV:439-442	0	0	0	SignalP3NN:18,SignalP4:18,SignalP5:18,DeepSig:18,Phobius:18,SignalP6:18,SignalP3HMM:25	1	1
XPS77813.1	0.382	-1.732	3.184	.	.	.	.	0	0	0	PF00732,PF05199	Domain:GMC_oxred_N,Domain:GMC_oxred_C	0	AA3_2,AA3,AA3_3	0	0	0.08	.	.	0.892	0.073	0.337	0.4	1	1	0	0	71160.4	648	8	8.068	8	201	361	183	72	366	143	78	65	0.968	VIIR:[LIJVAP]X[KRTPEI]R:29-32,LAAR:LXXR:48-51,LYPR:[LIJVAP]X[KRTPEI]R&LXXR:134-137,KR:[KR]R:270-271,IDIR:[LIJVAP]X[KRTPEI]R:295-298,ADPR:[LIJVAP]X[KRTPEI]R:329-332,LQDR:LXXR:392-395,IPRR:[LIJVAP]X[KRTPEI]R:447-450,RR:[KR]R:449-450,LKAR:LXXR:493-496,VDPR:[LIJVAP]X[KRTPEI]R:509-512,IIKR:[LIJVAP]X[KRTPEI]R:546-549,KR:[KR]R:548-549	RDYD:32-35,RVLV:58-61,KYYT:110-113,HKME:182-185,HGFD:197-200,RDFL:275-278,KIIF:305-308,RAIG:314-317,KGIA:341-344,RSLG:375-378,KPFT:406-409,KMLQ:429-432,HGYS:475-478,RYFD:520-523,RSII:544-547,KRYA:548-551,RGLR:612-615	0	0	0	DeepSig:19,SignalP3NN:22,SignalP3HMM:22,SignalP4:22,SignalP5:22,Phobius:22	1	1
XPS80711.1	0.382	-1.921	3.158	.	.	.	.	0	0	0	.	.	0	.	0	0	0.044	.	.	0.894	0.178	0.554	0.08	1	1	0	0	121958	1099	-16.5	5.437	10	313	579	312	129	595	285	141	144	0.988	AHPR:[LIJVAP]X[KRTPEI]R:23-26,LTGR:LXXR:387-390,PAKR:[LIJVAP]X[KRTPEI]R:417-420,KR:[KR]R:419-420,AAER:[LIJVAP]X[KRTPEI]R:482-485,ILTR:[LIJVAP]X[KRTPEI]R:760-763,LDQR:LXXR:869-872,LNVR:LXXR:901-904,RR:[KR]R:939-940,VLKR:[LIJVAP]X[KRTPEI]R:1079-1082,KR:[KR]R:1081-1082	RSLN:2-5,RPYT:26-29,KVFG:38-41,KAIE:99-102,KLWG:120-123,KELP:125-128,HCYF:132-135,KGLK:143-146,KEYR:190-193,KQIS:240-243,RNLG:258-261,HNIV:269-272,RLIK:278-281,KYIH:341-344,KDLE:376-379,KSLT:385-388,RDLA:390-393,RKIW:485-488,RAYK:509-512,HVLP:515-518,RVFH:534-537,HDIE:548-551,KVYR:562-565,RQMS:612-615,KFIV:636-639,KALL:686-689,HQIT:715-718,KSIL:758-761,KLWG:811-814,KGIS:819-822,KFMS:842-845,RHLL:…	1	0	0	SignalP3NN:18,SignalP3HMM:18,SignalP4:18,SignalP5:18,DeepSig:18,SignalP6:18,Phobius:25	1	1
XPS78441.1	0.381	-0.663	3.258	.	.	.	.	0	0	0	PF00328	Family:His_Phos_2	0	.	0	0	0.145	.	.	0.686	0.843	0.377	0.11	1	1	0	0	51345.4	460	2.5	6.772	8	135	231	119	68	260	116	63	53	1.009	LEDR:LXXR:121-124,LLGR:LXXR:143-146,VAKR:[LIJVAP]X[KRTPEI]R:227-230,KR:[KR]R:229-230,KR:[KR]R:260-261	KALL:4-7,KPFL:92-95,KHLL:141-144,RILA:156-159,RTYD:164-167,KNLV:170-173,KFIK:218-221,KRLA:229-232,RFFL:328-331,RAWR:368-371,RFIA:404-407,RPIP:412-415,KDFH:442-445	1	0	0	SignalP3NN:14,SignalP4:14,SignalP6:14,DeepSig:16,Phobius:19,SignalP5:25	1	0
XPS77227.1	0.378	2.543	3.283	MoSlp1,Mg3LysM,CfEcp6,RiSLM,MgxLysM,Mg1LysM	.	.	.	0	0	0	.	.	0	.	0	0	0.016	.	0.525	.	0.086	0.417	0.65	1	1	0	0	37197.2	352	-11	4.384	12	152	235	96	27	184	60	25	35	0.802	APIR:[LIJVAP]X[KRTPEI]R:20-23,VVTR:[LIJVAP]X[KRTPEI]R:26-29,LVAR:LXXR:31-34,PTTR:[LIJVAP]X[KRTPEI]R:124-127,RR:[KR]R:329-330	RALV:29-32,KSWL:54-57,KTIQ:68-71,KEFI:106-109,RLMI:161-164,KWYK:191-194,RLYN:197-200,RRLN:329-332	0	0	0	SignalP3NN:19,SignalP3HMM:19,SignalP4:19,SignalP5:19,DeepSig:19,Phobius:19,SignalP6:19	1	1
XPS67733.1	0.374	0.281	2.996	.	.	.	.	0	0	0	PF00188	Domain:CAP	1	.	0	0	0.015	.	.	0.678	0.025	0.541	0.71	1	1	0	0	36876.3	357	10.5	9.304	4	150	253	114	35	209	41	28	13	0.54	LDKR:[LIJVAP]X[KRTPEI]R&LXXR:22-25,KR:[KR]R:24-25,PNTR:[LIJVAP]X[KRTPEI]R:55-58,RR:[KR]R:58-59,VSIR:[LIJVAP]X[KRTPEI]R:128-131	RAIL:193-196,HYIP:232-235	0	1	0	SignalP3NN:17,SignalP3HMM:17,SignalP4:17,SignalP5:17,DeepSig:17,Phobius:17,SignalP6:25	1	1
XPS71874.1	0.372	0.34	3.311	CfTom1	.	.	.	0	0	0	.	.	0	GH5_31,GH5	0	0	0.044	.	.	0.895	0.733	0.426	0.43	1	1	0	0	67546.8	623	18.5	7.954	27	221	356	163	69	346	141	86	55	0.791	LFIR:[LIJVAP]X[KRTPEI]R&LXXR:65-68,LTAR:LXXR:279-282,PGKR:[LIJVAP]X[KRTPEI]R:287-290,KR:[KR]R:289-290,LNLR:LXXR:321-324,PTTR:[LIJVAP]X[KRTPEI]R:468-471,LCSR:LXXR:542-545	HSFG:30-33,RVIR:61-64,KSLL:85-88,HRIS:99-102,KVII:107-110,HALR:116-119,RAIY:147-150,KHYP:159-162,KNFG:164-167,RPWS:169-172,RKLL:290-293,RGIP:324-327,HRIR:477-480,HPLC:501-504	1	0	0	SignalP3NN:22,SignalP3HMM:22,SignalP4:22,SignalP5:22,DeepSig:22,Phobius:22,SignalP6:22	1	1
XPS73926.1	0.372	0.761	3.276	.	.	.	.	0	0	0	.	.	0	.	0	0	0.051	0.656	.	.	0.008	0.425	0.35	1	1	0	0	42902.6	407	25.5	10.244	8	153	238	123	25	225	100	64	36	0.907	KR:[KR]R:134-135,ILRR:[LIJVAP]X[KRTPEI]R:214-217,RR:[KR]R:216-217,LSER:[LIJVAP]X[KRTPEI]R&LXXR:321-324,LGPR:[LIJVAP]X[KRTPEI]R&LXXR:401-404	KVIT:33-36,KNIG:98-101,RTIL:109-112,KALE:122-125,RDLV:208-211,KILR:213-216,KDLV:258-261,KTLS:396-399	1	0	0	SignalP3NN:19,SignalP3HMM:19,SignalP4:19,SignalP5:19,DeepSig:19,Phobius:19,SignalP6:19	1	1
XPS80821.1	0.372	-1.653	3.205	.	.	.	.	0	0	0	PF09362	Domain:DUF1996	0	.	0	0	0.033	.	.	0.773	0.048	0.413	0.45	1	1	0	0	53531.2	497	-10	5.261	12	183	310	123	63	268	110	54	56	0.776	RR:[KR]R:485-486,AHRR:[LIJVAP]X[KRTPEI]R:490-493,RR:[KR]R:492-493	HVIH:49-52,RNFT:134-137,KSLG:161-164,RHFM:180-183,KDYL:186-189,HDLH:494-497	0	0	0	SignalP3NN:20,SignalP3HMM:20,SignalP4:20,SignalP5:20,Phobius:20,SignalP6:20	1	1
XPS79851.1	0.37	-2.153	3.212	.	.	.	.	0	0	0	PF01055,PF16863	Family:Glyco_hydro_31,Domain:NtCtMGAM_N	0	GH31	0	0	0.009	.	.	0.957	0.41	0.436	0.78	1	1	0	0	109769	1003	-38.5	4.45	7	345	582	273	146	560	176	75	101	0.934	LIPR:[LIJVAP]X[KRTPEI]R&LXXR:147-150,LGER:[LIJVAP]X[KRTPEI]R&LXXR:215-218,LETR:[LIJVAP]X[KRTPEI]R&LXXR:253-256,LTWR:LXXR:312-315,PGKR:[LIJVAP]X[KRTPEI]R:652-655,KR:[KR]R:654-655,LCSR:LXXR:718-721,VYIR:[LIJVAP]X[KRTPEI]R:864-867	HYIL:140-143,HGLR:220-223,RNIY:243-246,HPFY:249-252,RYFE:256-259,HGME:301-304,RSLG:315-318,KQYQ:336-339,RNWT:364-367,REIV:370-373,RAFD:377-380,RDFT:397-400,KEMV:491-494,RTIP:587-590,RNIN:595-598,HQII:637-640,RPFI:655-658,KWYY:681-684,RWMQ:721-724,RALA:785-788	0	0	0	SignalP3NN:22,SignalP4:22,SignalP5:22,DeepSig:22,SignalP6:22,Phobius:30	1	0
XPS81197.1	0.37	-1.94	3.278	.	.	.	.	0	0	0	PF01915,PF00933,PF14310	Domain:Glyco_hydro_3_C,Domain:Glyco_hydro_3,Family:Fn3-like	0	GH3	0	0	0.044	.	.	0.955	0.25	0.49	0.78	1	1	0	0	95080	871	-33	4.384	8	293	518	227	113	483	161	67	94	0.971	RR:[KR]R:135-136,AATR:[LIJVAP]X[KRTPEI]R:343-346,AIKR:[LIJVAP]X[KRTPEI]R:474-477,KR:[KR]R:476-477,LYGR:LXXR:595-598,PQPR:[LIJVAP]X[KRTPEI]R:750-753,ITRR:[LIJVAP]X[KRTPEI]R:825-828,RR:[KR]R:827-828	HRLA:2-5,RQLT:64-67,KALC:98-101,RGYQ:136-139,RNWE:168-171,RGIQ:189-192,KHFI:201-204,KTLH:233-236,RIMA:346-349,RNFY:376-379,RAIR:399-402,RAFD:644-647,RGFD:806-809,KKIY:847-850,RKLY:856-859	0	0	0	SignalP3NN:16,SignalP4:16,SignalP5:16,DeepSig:16,Phobius:16,SignalP6:16	1	0
XPS72607.1	0.369	3.423	-0.053	.	.	.	.	0	0	0	PF04749	Family:PLAC8	0	.	0	1	0.954	0.89	0.654	.	0.168	0.19	0.49	0	0	0	0	16600	148	5	7.594	17	54	81	26	17	81	32	20	12	0.774	LTNR:LXXR:74-77	HRMN:39-42,KPLL:120-123	0	0	0	.	0	0
XPS72806.1	0.367	0.517	3.299	MoCDIP4	.	.	.	0	0	0	PF03443	Family:AA9	1	AA9	0	0	0.049	.	.	0.805	0.428	0.601	0.81	1	1	0	0	35253.8	348	-10	4.685	2	175	229	110	34	197	64	29	35	0.492	RR:[KR]R:340-341	HHFA:33-36,KLYE:121-124,KFIS:136-139,KGLI:141-144,KAYS:202-205,KVWD:228-231,RSFF:344-347	0	0	0	SignalP3HMM:17,SignalP5:17,Phobius:17,SignalP6:17	0	1
XPS77767.1	0.367	-0.293	0.706	.	.	.	.	0	0	0	PF12850	Domain:Metallophos_2	0	.	0	0.802	0.508	.	.	0.502	0.071	0.386	0.14	1	1	0	0	21717.9	200	-6	4.748	1	58	106	66	21	121	50	23	27	0.88	.	KKLL:26-29,RGIA:53-56,HTII:92-95,RQMD:108-111,HKFE:121-124,KFFV:131-134	0	0	0	SignalP3NN:18,Phobius:18	1	0
XPS77091.1	0.363	-2.23	3.084	.	.	.	.	0	0	0	PF00326	Domain:Peptidase_S9	0	CE1	0	0	0.009	.	.	0.934	0.38	0.375	0.84	1	1	0	0	79531.9	724	-19.5	4.794	0	245	416	198	112	398	138	64	74	1.07	APRR:[LIJVAP]X[KRTPEI]R:29-32,RR:[KR]R:31-32,KR:[KR]R:506-507,LDYR:LXXR:656-659	RYLG:5-8,KLIS:25-28,HFLV:146-149,RFYK:173-176,RHWD:181-184,RNLN:213-216,KLYA:246-249,RKLA:307-310,KGLS:344-347,KIFN:378-381,HAWV:471-474,KTYP:484-487,KRWN:506-509,KALV:596-599,HDYD:621-624,HFIV:649-652,RFLN:680-683,KEIF:702-705	1	0	0	SignalP3NN:19,SignalP3HMM:19,SignalP4:19,SignalP5:19,DeepSig:19,Phobius:19,SignalP6:19	1	1
XPS75628.1	0.363	-2.018	3.133	.	.	.	.	0	0	0	PF07732,PF07731,PF00394	Domain:Cu-oxidase_3,Domain:Cu-oxidase_2,Domain:Cu-oxidase	0	AA1_3,AA1,AA1_1,AA1_2	0	0	0.009	.	.	0.879	0.508	0.398	0.74	1	1	0	0	66355.4	609	-10.5	5.476	7	193	364	164	81	350	116	58	58	0.893	AVKR:[LIJVAP]X[KRTPEI]R:52-55,KR:[KR]R:54-55,PIRR:[LIJVAP]X[KRTPEI]R:521-524,RR:[KR]R:523-524	RGLY:43-46,RPMM:113-116,HGLR:153-156,KVYR:180-183,HRLR:281-284,HPFT:301-304,HSWQ:470-473,HPIH:489-492,HDFF:496-499,KEYY:594-597	0	0	0	SignalP3NN:20,SignalP4:20,SignalP3HMM:22,SignalP5:22,DeepSig:22,Phobius:22,SignalP6:22	1	1
XPS81260.1	0.361	-0.361	3.285	.	.	.	.	0	0	0	.	.	0	.	0	0	0.151	.	.	0.586	0.821	0.336	0.69	1	1	0	0	25654	244	6	9.139	4	112	149	57	22	131	35	21	14	0.714	KR:[KR]R:38-39	KQLS:161-164,RGYG:175-178,KTIS:212-215,KGLT:223-226,KTWT:232-235	0	1	0	SignalP3NN:15,SignalP4:15,SignalP6:15,SignalP3HMM:17,SignalP5:17,DeepSig:17,Phobius:17	1	1
XPS76818.1	0.36	3.253	-0.005	.	.	.	.	0	0	0	.	.	0	.	0	0.999	0.89	0.8	0.672	.	0.867	0.47	0.67	0	0	0	0	7316.36	67	4	8.874	4	27	36	12	7	36	12	8	4	1.188	LCCR:LXXR:15-18	.	0	0	0	.	0	0
XPS80823.1	0.359	-1.468	2.65	.	.	.	.	0	0	0	PF00026	Family:Asp	0	.	0	0.005	0.063	.	.	0.61	0.934	0.383	0.02	1	1	0	0	29244	261	-13	4.453	2	69	131	75	23	139	71	30	41	0.818	INTR:[LIJVAP]X[KRTPEI]R:105-108,IGIR:[LIJVAP]X[KRTPEI]R:119-122,VTPR:[LIJVAP]X[KRTPEI]R:207-210,LMAR:LXXR:223-226,RR:[KR]R:226-227	RTYS:41-44,RLLD:50-53,KDIY:129-132,KEIV:203-206,RQYV:210-213,KCIL:220-223,RAYQ:227-230	0	0	0	SignalP3NN:16,SignalP3HMM:16,SignalP4:16,SignalP5:16,DeepSig:16,Phobius:16,SignalP6:16	1	1
XPS73265.1	0.359	-1.084	3.261	.	.	.	.	0	0	0	.	.	0	.	0	0	0.063	.	.	0.644	0.246	0.539	0.77	1	1	0	0	42866.6	493	9.5	10.909	0	369	408	137	6	274	30	20	10	0.193	KR:[KR]R:27-28,KR:[KR]R:57-58	KRWV:27-30,RQIA:47-50,RQLD:58-61	1	0	1	SignalP3NN:18,SignalP3HMM:18,SignalP4:18,SignalP5:18,DeepSig:18,Phobius:18,SignalP6:18	1	1
XPS74762.1	0.357	5.093	3.075	.	.	.	.	0	0	0	.	.	0	.	0	1	0.752	0.502	.	.	0.531	0.335	0.38	1	1	0	0	3658.33	33	-3	3.987	3	12	16	8	3	23	7	2	5	0.429	.	RSLL:16-19	0	0	0	Phobius:19,SignalP3NN:25,SignalP3HMM:25,SignalP5:25	1	1
XPS73364.1	0.355	-1.378	1.252	MoCDIP11	.	.	.	0	0	0	PF00722	Domain:Glyco_hydro_16	0	GH16_18,GH16_19,GH16,GH16_21,GH16_20,GH16_27,GH16_25,GH16_5,GH16_3	0	0	0.027	.	.	0.688	0.277	0.423	0.84	1	1	0	0	38883.3	371	-13.5	4.3	3	182	248	102	38	185	62	25	37	0.731	PTIR:[LIJVAP]X[KRTPEI]R:84-87,LFGR:LXXR:93-96,LNVR:LXXR:348-351	HDFT:47-50,KWYI:89-92,HNYT:166-169,RTLN:187-190,KNYP:198-201	0	0	0	SignalP3NN:21,SignalP3HMM:21,SignalP4:21,SignalP5:21,DeepSig:21,Phobius:21,SignalP6:21	1	1
XPS69370.1	0.35	0.624	3.292	PpCBEL	.	.	.	0	0	0	PF14295	Domain:PAN_4	0	.	0	0	0.027	.	.	0.76	0.985	0.34	0.86	1	1	0	0	177324	1672	-19	5.043	40	671	1071	467	152	889	319	153	166	0.939	LAAR:LXXR:15-18,VAKR:[LIJVAP]X[KRTPEI]R:32-35,KR:[KR]R:34-35,LSKR:[LIJVAP]X[KRTPEI]R&LXXR:615-618,KR:[KR]R:617-618,LGPR:[LIJVAP]X[KRTPEI]R&LXXR:837-840,KR:[KR]R:1165-1166,RR:[KR]R:1190-1191,KR:[KR]R:1410-1411	RSLA:18-21,KDYA:65-68,HVWS:227-230,KLIT:232-235,KSLE:293-296,HVWG:337-340,KELE:359-362,RALD:576-579,HVLA:594-597,RGWL:618-621,KKIA:626-629,KFYD:721-724,KLLP:749-752,KTLR:815-818,KDLF:819-822,KGLP:824-827,RVIL:840-843,KEWK:982-985,KTFT:1040-1043,RHIA:1117-1120,KTFT:1136-1139,RDIT:1237-1240,KSIS:1274-1277,KELR:1284-1287,RNLD:1382-1385,KTIM:1555-1558,RHLH:1564-1567,KLIT:1594-1597,KIFL:1632-1635	0	0	0	SignalP3NN:21,SignalP4:21,SignalP5:21,DeepSig:21,Phobius:21,SignalP6:21	1	0
XPS78920.1	0.35	-2.258	3.263	.	.	.	.	0	0	0	PF01055,PF16863,PF13802	Family:Glyco_hydro_31,Domain:NtCtMGAM_N,Domain:Gal_mutarotas_2	0	GH31	0	0	0.009	.	.	0.987	0.01	0.273	0.36	1	1	0	0	94159	847	-11.5	5.396	7	266	468	237	118	470	180	89	91	1.069	PLRR:[LIJVAP]X[KRTPEI]R:26-29,RR:[KR]R:28-29,VVPR:[LIJVAP]X[KRTPEI]R:99-102,LRLR:LXXR:151-154,LWAR:LXXR:184-187,AKTR:[LIJVAP]X[KRTPEI]R:446-449,LARR:[LIJVAP]X[KRTPEI]R&LXXR:451-454,RR:[KR]R:453-454,LPNR:LXXR:463-466,LNRR:[LIJVAP]X[KRTPEI]R&LXXR:519-522,RR:[KR]R:521-522,PNKR:[LIJVAP]X[KRTPEI]R:523-526,KR:[KR]R:525-526,VITR:[LIJVAP]X[KRTPEI]R:529-532,LCAR:LXXR:590-593,IDIR:[LIJVAP]X[KRTPEI]R:631-63…	KFLA:70-73,HVMI:82-85,RTLW:182-185,REYS:262-265,KSIG:289-292,KVFT:322-325,RDLV:336-339,HYIV:348-351,RGIE:367-370,RSLA:449-452,KGLP:461-464,RDLL:466-469,HNLY:503-506,RPMV:526-529,HWLG:544-547,RHLL:561-564,KAID:629-632,KLLD:636-639,RALR:751-754,KPFE:756-759,KGFD:831-834	0	0	0	SignalP3NN:24,SignalP3HMM:24,SignalP4:24,SignalP5:24,DeepSig:24,Phobius:24,SignalP6:24	1	1
XPS76533.1	0.349	2.079	3.229	.	.	.	.	0	0	0	.	.	0	.	0	0.999	0.559	.	.	0.816	0.98	0.374	0.61	1	1	0	0	19296	182	8.5	8.414	7	71	111	57	18	114	45	29	16	0.197	LYTR:[LIJVAP]X[KRTPEI]R&LXXR:2-5,ATPR:[LIJVAP]X[KRTPEI]R:54-57,VPPR:[LIJVAP]X[KRTPEI]R:115-118,RR:[KR]R:132-133,AWRR:[LIJVAP]X[KRTPEI]R:134-137,RR:[KR]R:136-137	RLFE:59-62,HLIR:63-66,RAWR:133-136	1	0	1	SignalP3HMM:17,Phobius:17,SignalP3NN:22,SignalP4:22,SignalP5:22,DeepSig:22	1	1
XPS75197.1	0.349	-3.287	1.519	.	.	.	.	0	0	0	.	.	0	.	0	0	0.01	.	.	0.703	0.008	0.513	0.81	1	1	0	0	17690.5	186	1	8.755	0	106	147	67	9	110	7	4	3	0.384	.	RTLV:104-107	0	0	0	SignalP3NN:16,SignalP4:16,SignalP5:16,DeepSig:16,SignalP6:16,SignalP3HMM:20,Phobius:20	1	1
XPS76960.1	0.348	2.216	2.888	.	.	.	.	0	0	0	.	.	0	.	0	0	0.411	0.742	.	.	0.008	0.766	0.21	1	1	0	0	47722.3	405	-4	5.887	9	52	176	35	28	131	244	122	122	1.704	.	KPIQ:19-22,KDYP:47-50,KCYD:166-169,KCYD:195-198,KEMK:202-205,KCYD:224-227,KEMK:231-234,KCYD:253-256,KEMK:260-263,KDWE:303-306,KKYT:381-384	1	0	0	SignalP3NN:18,SignalP3HMM:18,SignalP4:18,SignalP5:18,DeepSig:18,Phobius:18,SignalP6:23	1	1
XPS75743.1	0.347	-0.081	3.276	.	.	.	.	0	0	0	PF16670	Domain:PI-PLC-C1	0	.	0	0	0.268	.	.	0.714	0.938	0.358	0.28	1	1	0	0	42730.1	384	-0.5	6.437	6	112	212	103	46	197	98	52	46	1.104	LAER:[LIJVAP]X[KRTPEI]R&LXXR:48-51,LQNR:LXXR:268-271,VRTR:[LIJVAP]X[KRTPEI]R:310-313	KYIP:56-59,RSFE:81-84,KVFH:125-128,HTFV:139-142,KSWS:149-152,RLLN:191-194,KQLI:206-209,KGWP:228-231,RFMF:239-242,RELY:257-260,KGYI:306-309	0	0	0	SignalP3HMM:19,SignalP4:19,SignalP5:19,DeepSig:19,Phobius:19,SignalP6:19,SignalP3NN:21	1	1
XPS76648.1	0.346	0.423	3.271	MoCDIP4,MoCDIP11,BghBEC4	.	.	.	0	0	0	PF03067	Domain:LPMO_10	0	AA16,AA15,AA17	0	0	0.011	.	.	0.732	0.139	0.523	0.5	1	1	0	0	31519.9	305	-6	4.878	6	137	204	93	28	171	51	24	27	0.505	PSPR:[LIJVAP]X[KRTPEI]R:26-29,VEIR:[LIJVAP]X[KRTPEI]R:98-101,RR:[KR]R:288-289	KSYS:2-5,HGFI:20-23,RMWQ:70-73,KVIG:119-122,RAIQ:289-292,RAFR:301-304	0	0	0	SignalP3NN:19,SignalP3HMM:19,SignalP4:19,DeepSig:19,Phobius:19,SignalP6:19,SignalP5:21	1	1
XPS68667.1	0.346	-0.704	3.1	.	.	.	.	0	0	0	.	.	0	.	0	0.008	0.114	.	.	0.59	0.961	0.445	0.61	1	1	0	0	31394.5	298	-8.5	4.64	12	117	190	76	18	163	60	27	33	0.623	LYWR:LXXR:279-282,LVCR:LXXR:288-291	RLIT:6-9,KCIL:72-75,RTLT:92-95,HHLS:140-143,KGMS:264-267	0	1	0	SignalP3NN:19,SignalP4:19,SignalP3HMM:29,SignalP5:29,DeepSig:29,Phobius:29,SignalP6:29	1	1
XPS79371.1	0.346	-3.486	-0.202	.	.	.	.	0	0	0	PF20520	Domain:Ac45-VOA1_TM	0	.	0	0.023	0.261	.	.	0.657	0.653	0.223	0.46	1	1	1	0	30762.8	283	-6.5	4.741	2	100	150	89	30	152	57	26	31	1	KR:[KR]R:210-211,KR:[KR]R:218-219,VGIR:[LIJVAP]X[KRTPEI]R:256-259	KTLI:3-6,KYLE:118-121,KALR:139-142,HTYE:193-196,RALT:259-262,KEMG:273-276	0	0	0	SignalP3NN:19,SignalP3HMM:19,SignalP4:19,SignalP5:19,DeepSig:19,Phobius:19,SignalP6:19	1	1
XPS75586.1	0.344	-2.536	2.198	.	.	.	.	0	0	0	PF00450,PF05388	Domain:Peptidase_S10,Family:Carbpep_Y_N	0	.	0	0	0.03	.	.	0.715	0.016	0.23	0.22	1	1	0	0	61036.6	543	-12.5	4.959	11	151	284	134	76	293	135	64	71	1.352	PHTR:[LIJVAP]X[KRTPEI]R:81-84,ALPR:[LIJVAP]X[KRTPEI]R:335-338	KGFD:30-33,KPLQ:39-42,KSLT:49-52,RAIW:56-59,KQYS:140-143,KHLF:153-156,KQFP:252-255,HYIP:272-275,RNIN:287-290,RPMA:311-314,KSMD:330-333,RNFL:426-429,KPFH:436-439,KEIP:447-450,KAWT:468-471,KEYK:480-483,KDFK:488-491,RWLS:534-537	0	0	0	SignalP3NN:15,SignalP3HMM:15,SignalP4:15,SignalP5:15,DeepSig:15,Phobius:15	1	1
XPS69711.1	0.342	0.229	2.55	.	.	.	.	0	0	0	.	.	0	.	0	0.001	0.097	.	0.573	.	0.031	0.432	0.69	1	1	0	0	26809.9	247	-11	4.227	4	94	150	65	26	129	44	17	27	1.122	.	RWLS:68-71,KHWC:111-114,KDMK:170-173,HSWY:194-197,KAMT:212-215,KTWT:231-234	0	0	0	SignalP3NN:20,SignalP3HMM:20,SignalP4:20,SignalP5:20,DeepSig:20,Phobius:20,SignalP6:20	1	1
XPS71409.1	0.341	-1.373	3.253	.	.	.	.	0	0	0	PF09284,PF14683,PF14686	Domain:RhgB_N,Domain:CBM-like,Domain:fn3_3	0	PL4_1,PL4,PL4_4	0	0	0.011	.	.	0.634	0.021	0.276	0.75	1	1	0	0	55950.4	528	0	6.497	6	231	331	142	61	282	90	47	43	0.935	AFTR:[LIJVAP]X[KRTPEI]R:250-253	HYYV:99-102,RFIA:126-129,KFYS:170-173,RFID:176-179,RDIN:212-215,KDLS:269-272,HWYN:301-304,KGFR:378-381,RGLT:471-474,RGFG:479-482	1	0	0	SignalP3NN:19,SignalP3HMM:19,SignalP4:19,SignalP5:19,DeepSig:19,Phobius:19,SignalP6:19	1	1
XPS73857.1	0.341	-0.397	3.262	.	.	.	.	0	0	0	PF03022	Repeat:MRJP	0	.	0	0	0.146	.	.	0.593	0.968	0.406	0.75	1	1	0	0	45099.2	417	-6.5	4.779	0	140	257	115	44	230	69	32	37	0.929	RR:[KR]R:53-54,PTKR:[LIJVAP]X[KRTPEI]R:294-297,KR:[KR]R:296-297,LRDR:LXXR:298-301,RR:[KR]R:395-396	KFLL:4-7,HLYY:36-39,RRWS:53-56,RLWI:131-134,KLIG:156-159,RHLN:228-231,RGFV:240-243,RGLY:288-291,KRLR:296-299,KSFF:387-390,RPFA:398-401	0	0	0	SignalP3NN:19,SignalP3HMM:19,SignalP4:19,SignalP5:19,DeepSig:19,SignalP6:19,Phobius:23	1	1
XPS73107.1	0.341	-2.432	2.93	.	.	.	.	0	0	0	PF04616	Family:Glyco_hydro_43	0	GH43_34,GH43_22,GH43_21,GH43_29,GH43,GH43_3,GH43_19,GH43_20,GH43_9,GH43_2,GH43_18,GH43_31,GH43_30,GH43_16,GH43_32,GH43_26,GH43_8,GH43_35,GH43_10,GH43_33,GH43_5,GH43_1,GH43_24,GH43_11,GH43_4,GH43_23,GH43_17,GH117,GH43_12,GH43_28,GH43_6,GH43_27,GH43_15,GH43_14,GH159	0	0	0.009	.	.	0.928	0.067	0.576	0.75	1	1	0	0	73007	666	-23.5	4.477	4	242	388	177	93	365	131	56	75	1.006	RR:[KR]R:2-3,RR:[KR]R:355-356,LTAR:LXXR:360-363,VIER:[LIJVAP]X[KRTPEI]R:441-444,LNYR:LXXR:550-553	KELN:66-69,KGLR:82-85,KFFL:97-100,KAWS:133-136,HRML:187-190,KFYL:290-293,RGYI:301-304,KTYY:382-385,KFFF:447-450,KTIG:462-465,KYYL:508-511,RAIT:536-539,KGIL:598-601,HRFA:622-625,KVFF:640-643	0	0	0	SignalP3NN:19,SignalP3HMM:19,SignalP4:19,SignalP5:19,DeepSig:19,Phobius:19,SignalP6:19	1	1
XPS73074.1	0.339	-1.952	3.235	.	.	.	.	0	0	0	PF01425	Family:Amidase	0	.	0	0	0.01	.	.	0.859	0.051	0.455	0.82	1	1	0	0	58604.9	555	-11	4.706	2	208	339	198	55	330	90	41	49	0.844	LTSR:LXXR:232-235,AGKR:[LIJVAP]X[KRTPEI]R:302-305,KR:[KR]R:304-305,LGSR:LXXR:313-316,LPTR:[LIJVAP]X[KRTPEI]R&LXXR:456-459	KVFV:9-12,HPLL:27-30,RILE:62-65,KELD:85-88,HGLP:101-104,RALV:235-238,KRIG:304-307,RNIV:316-319,RNFT:392-395,KHWS:510-513,KPYI:535-538	0	0	0	SignalP3NN:22,SignalP3HMM:22,SignalP4:22,SignalP5:22,DeepSig:22,Phobius:22,SignalP6:22	1	1
XPS73104.1	0.337	-2.406	3.089	.	.	.	.	0	0	0	PF01593	Domain:Amino_oxidase	0	.	0	0	0.01	.	.	0.985	0.09	0.299	0.07	1	1	0	0	74096.7	676	-4	6.14	6	227	368	210	83	385	147	76	71	0.832	LEER:[LIJVAP]X[KRTPEI]R&LXXR:70-73,LIGR:LXXR:113-116,KR:[KR]R:128-129,AEER:[LIJVAP]X[KRTPEI]R:317-320,VQER:[LIJVAP]X[KRTPEI]R:417-420,LLSR:LXXR:480-483	KGLF:2-5,KPLT:33-36,HAYS:106-109,KKIA:165-168,HDWH:189-192,KYLA:207-210,HKMV:245-248,RNIS:337-340,KGLF:353-356,RTID:400-403,KGLE:404-407,RAFL:411-414,RLWE:470-473,RAIS:483-486,RFWE:503-506,RSLA:553-556,RAMV:569-572,HAWI:635-638,KQIV:663-666,RWIH:672-675	0	0	0	SignalP3NN:20,SignalP3HMM:20,SignalP4:20,SignalP5:20,DeepSig:20,Phobius:20,SignalP6:26	1	1
XPS67788.1	0.337	-0.713	2.873	.	.	.	.	0	0	0	PF05572	Family:Peptidase_M43	0	.	0	0.001	0.172	.	.	0.55	0.142	0.417	0.56	1	1	0	0	32766.2	302	-14	4.35	7	106	180	69	33	159	67	28	39	0.892	LAAR:LXXR:59-62,LAAR:LXXR:66-69	KQLR:140-143,HWLG:214-217,HTFE:220-223,HNYM:269-272,RSMW:292-295	0	0	0	SignalP3NN:16,SignalP5:16,DeepSig:16,Phobius:16,SignalP6:16,SignalP3HMM:19,SignalP4:19	1	1
XPS79106.1	0.336	-2.179	2.493	.	.	.	.	0	0	0	.	.	0	.	0	0	0.02	.	.	0.676	0.088	0.238	0.78	1	1	0	0	24472.8	245	-6	4.318	6	129	184	82	18	134	25	10	15	0.541	LVVR:LXXR:20-23,LLKR:[LIJVAP]X[KRTPEI]R&LXXR:31-34,KR:[KR]R:33-34	RYYG:86-89	0	0	0	SignalP3NN:17,SignalP3HMM:17,SignalP4:17,SignalP5:17,DeepSig:17,Phobius:17,SignalP6:17	1	1
XPS73095.1	0.336	-2.714	2.782	.	.	.	.	0	0	0	PF07519	Family:Tannase	0	.	0	0	0.009	.	.	0.979	0.033	0.324	0.3	1	1	0	0	63204.1	579	-15	4.932	11	190	313	166	67	326	133	63	70	0.796	KR:[KR]R:446-447,LVTR:[LIJVAP]X[KRTPEI]R&LXXR:511-514,ASER:[LIJVAP]X[KRTPEI]R:554-557,LADR:LXXR:565-568,LGLR:LXXR:572-575	RLLL:2-5,KWLL:6-9,HDFT:60-63,KVLV:94-97,HNFA:175-178,KVIT:190-193,HSYW:203-206,KTFL:257-260,HILK:324-327,KNIV:374-377,KLLT:424-427,RLFL:463-466,KSLA:482-485,RDLC:514-517,KYLG:524-527	0	0	0	SignalP3NN:18,SignalP3HMM:18,SignalP4:18,SignalP5:18,DeepSig:18,Phobius:18,SignalP6:18	1	1
XPS76662.1	0.335	-2.082	2.897	.	.	.	.	0	0	0	PF06824	Repeat:Glyco_hydro_125	0	GH125	0	0	0.011	.	.	0.839	0.819	0.272	0.14	1	1	0	0	61247.2	547	-5	5.895	6	160	279	150	72	292	130	66	64	1.149	RR:[KR]R:294-295,LAGR:LXXR:312-315,KR:[KR]R:347-348,LAKR:[LIJVAP]X[KRTPEI]R&LXXR:528-531,KR:[KR]R:530-531	KLYS:48-51,RTFE:75-78,KVIQ:84-87,KNMF:91-94,KDLA:96-99,RIFE:100-103,KSFQ:125-128,RSWE:129-132,KEIF:171-174,KLIL:175-178,HFLS:237-240,RWLQ:258-261,KKYG:385-388,RVFA:389-392,RKMI:432-435,HAWP:462-465,RDYT:507-510,RSWF:511-514,HLLF:534-537	0	0	0	SignalP3NN:19,SignalP4:19,DeepSig:19,Phobius:20,SignalP3HMM:21,SignalP5:21,SignalP6:21	1	1
XPS77962.1	0.326	-1.157	3.16	.	.	.	.	0	0	0	PF19527	Family:DUF6055	0	.	0	0	0.057	.	.	0.609	0.1	0.194	0.73	1	1	0	0	46602	441	-9	5.076	3	172	271	149	48	251	87	42	45	0.765	LTDR:LXXR:26-29,LGWR:LXXR:86-89	RVLS:58-61,KTLQ:70-73,HKLN:108-111,HEYG:153-156,HSMH:157-160,KNWV:164-167,KVIG:215-218,RMIR:261-264,HTLE:276-279,RILS:280-283,RYWA:297-300,RYMG:344-347,KGLQ:427-430	0	0	0	SignalP3NN:20,SignalP4:20,SignalP5:20,DeepSig:20,SignalP3HMM:23,Phobius:23,SignalP6:29	1	1
XPS75588.1	0.325	3.45	2.91	.	.	.	.	0	0	0	.	.	0	.	0	1	0.816	.	.	0.6	0.301	0.346	0.27	1	1	0	0	15030.4	136	7	8.314	8	47	69	42	13	81	30	20	10	0.515	ALRR:[LIJVAP]X[KRTPEI]R:36-39,RR:[KR]R:38-39,LQCR:LXXR:44-47,ALRR:[LIJVAP]X[KRTPEI]R:86-89,RR:[KR]R:88-89	HCIN:32-35,HLIY:60-63,RVME:114-117	0	1	0	SignalP3NN:21	1	0
XPS81588.1	0.325	-2.319	2.867	.	.	.	.	0	0	0	PF00732,PF05199	Domain:GMC_oxred_N,Domain:GMC_oxred_C	0	AA3_2,AA3,AA3_3,AA3_1	0	0	0.01	.	.	0.856	0.018	0.49	0.68	1	1	0	0	65494.4	613	4.5	7.492	3	212	367	204	64	365	117	63	54	0.873	RR:[KR]R:232-233,VGPR:[LIJVAP]X[KRTPEI]R:309-312,LFQR:LXXR:438-441,IKKR:[LIJVAP]X[KRTPEI]R:609-612,KR:[KR]R:611-612	KDYD:28-31,KVLG:109-112,KDYW:194-197,KILT:251-254,KKMT:265-268,KLLQ:302-305,HPYA:336-339,KKLL:422-425,KGYA:426-429,KKII:432-435,KPLS:464-467,RGFV:468-471,RFFR:503-506,KEYK:515-518,KLLV:569-572	0	0	0	SignalP3NN:23,SignalP3HMM:23,SignalP4:23,SignalP5:23,DeepSig:23,Phobius:23,SignalP6:23	1	1
XPS79624.1	0.323	0.77	3.31	.	.	.	.	0	0	0	PF01083	Domain:Cutinase	1	CE5	0	0.005	0.084	.	.	0.823	0.96	0.4	0.6	1	1	0	0	22082.4	227	2.5	7.7	4	110	158	89	16	160	22	13	9	0.44	LFAR:LXXR:38-41	KSFT:2-5,KPMT:33-36,KLMA:95-98,KVMA:103-106,KVIC:164-167,KSFS:223-226	0	0	0	SignalP3NN:16,SignalP4:16,SignalP5:16,DeepSig:16,Phobius:16,SignalP6:16,SignalP3HMM:19	1	1
XPS77388.1	0.321	-1.055	2.751	.	.	.	.	0	0	0	.	.	0	.	0	0.001	0.143	.	.	0.647	0.975	0.516	0.47	1	1	0	0	33980.9	316	-17	4.202	1	100	183	102	23	164	66	25	41	1.382	LDIR:[LIJVAP]X[KRTPEI]R&LXXR:31-34,LTAR:LXXR:80-83,LEAR:LXXR:120-123,ASKR:[LIJVAP]X[KRTPEI]R:185-188,KR:[KR]R:187-188,RR:[KR]R:215-216	RSFT:2-5,KVYL:117-120,RVLA:216-219,KNMR:246-249,KGLF:275-278	0	0	0	SignalP3NN:18,SignalP3HMM:18,SignalP4:18,SignalP5:18,DeepSig:18,Phobius:18,SignalP6:18	1	1
XPS74931.1	0.321	-1.94	2.547	.	.	.	.	0	0	0	PF07470	Repeat:Glyco_hydro_88	0	GH105	0	0	0.063	.	.	0.71	0.369	0.619	0.47	1	1	0	0	44263.3	391	-12	4.719	1	122	205	108	63	211	90	41	49	1.205	.	HTYV:45-48,HWWN:107-110,HRYR:124-127,KDIE:180-183,HGYD:203-206,KELP:245-248,KAYE:321-324	0	0	0	SignalP3NN:19,SignalP3HMM:19,SignalP4:19,SignalP5:19,Phobius:19,SignalP6:19	1	1
XPS68829.1	0.314	-1.51	2.922	.	.	.	.	0	0	0	.	.	0	.	0	0	0.049	.	.	0.671	0.501	0.168	0.57	1	1	0	0	36741.3	345	-9.5	4.422	4	132	213	108	37	198	50	21	29	0.859	AEIR:[LIJVAP]X[KRTPEI]R:141-144,RR:[KR]R:193-194,ITIR:[LIJVAP]X[KRTPEI]R:308-311	KGIN:110-113,RDIP:132-135,KTFG:276-279	0	0	0	SignalP6:10,SignalP5:14,Phobius:14,SignalP3NN:18,DeepSig:18,SignalP4:19	1	0
XPS79073.1	0.311	-0.31	-1.313	.	.	.	.	0	0	0	PF13561	Domain:adh_short_C2	0	.	0	0.849	0.595	.	0.547	.	0.028	0.242	0.24	0	0	0	0	28363.3	268	-1	6.117	3	97	151	89	25	159	55	28	27	0.986	LGKR:[LIJVAP]X[KRTPEI]R&LXXR:32-35,KR:[KR]R:34-35,LNTR:[LIJVAP]X[KRTPEI]R&LXXR:122-125,KR:[KR]R:183-184	RGIG:22-25,KIIQ:55-58,KAIA:65-68,RLFE:81-84,KAFG:88-91,HVFN:118-121,KYIE:136-139,RIIL:143-146,HALY:160-163,KAFA:175-178,RGIT:184-187,HYIP:207-210	0	0	0	.	0	0
XPS68345.1	0.31	-2.9	1.465	.	.	.	.	0	0	0	.	.	0	CBM61	0	0.027	0.122	.	.	0.832	0.889	0.395	0.73	1	1	0	0	20979.8	201	-1	6.28	4	82	131	62	20	117	33	18	15	0.415	.	KLLT:12-15,KLLP:16-19,HTLA:30-33	0	1	0	SignalP3NN:33,SignalP3HMM:33,SignalP4:33,SignalP5:33,Phobius:33,SignalP6:33	1	1
XPS68110.1	0.309	0.116	3.268	CfTom1	.	.	.	0	0	0	PF01301,PF10435,PF13364,PF13363	Domain:Glyco_hydro_35,Domain:BetaGal_dom2,Domain:BetaGal_dom4_5,Domain:BetaGal_dom3	0	GH35	0	0	0.01	.	.	0.919	0.979	0.612	0.69	1	1	0	0	111336	1013	1	6.565	2	334	558	275	155	581	200	108	92	1.012	VAER:[LIJVAP]X[KRTPEI]R:33-36,AKRR:[LIJVAP]X[KRTPEI]R:543-546,KR:[KR]R:544-545,KR:[KR]R:642-643,LIFR:LXXR:721-724,KR:[KR]R:1008-1009	RFYQ:2-5,RTLR:22-25,HSLF:48-51,HPFR:65-68,KALG:83-86,KNYI:168-171,HLMK:215-218,RDLG:221-224,HEFE:317-320,RVFY:321-324,KLIA:379-382,KKYG:490-493,HELA:508-511,HGLS:630-633,KELK:637-640,KFLS:666-669,KSID:671-674,RGIL:810-813,RFYQ:893-896,KGWD:905-908,HGWR:925-928,KGIE:981-984	0	0	0	Phobius:19,SignalP3NN:21,SignalP4:21,SignalP5:21,DeepSig:21,SignalP6:21	1	0
XPS81297.1	0.309	-2.07	3.181	.	.	.	.	0	0	0	PF08760,PF16335,PF17168	Domain:DUF1793,Family:DUF4965,Family:DUF5127	0	.	0	0	0.009	.	.	0.9	0.27	0.628	0.33	1	1	0	0	90785.4	816	-20	4.96	4	267	429	218	120	436	181	86	95	1.017	LIVR:LXXR:28-31,LLGR:LXXR:76-79,KR:[KR]R:175-176,KR:[KR]R:202-203,LRQR:LXXR:239-242,LSAR:LXXR:367-370,LMDR:LXXR:599-602,LDSR:LXXR:727-730	RAFS:2-5,KGLK:194-197,HKFR:255-258,KSFK:271-274,RGLT:308-311,KPLW:314-317,KLIQ:326-329,KEIS:390-393,RWLA:417-420,HQLS:429-432,HDLG:442-445,KGIK:533-536,KKWL:539-542,KQWT:550-553,KGIV:585-588,KAFS:591-594,KYYR:607-610,KPLN:685-688,RHLY:730-733,RPFT:769-772,RAFE:813-816	0	0	0	SignalP3NN:18,SignalP3HMM:18,SignalP4:18,SignalP5:18,DeepSig:18,Phobius:18,SignalP6:18	1	1
XPS68799.1	0.307	0.67	3.22	MoChi1,MrChi,MpChi,VnaChtBP	.	.	.	0	0	0	PF00704	Domain:Glyco_hydro_18	1	GH18,CBM18	0	0	0.043	.	.	0.739	0.912	0.535	0.62	1	1	0	0	67295.6	619	0.5	6.558	11	221	385	141	72	325	137	72	65	0.816	AATR:[LIJVAP]X[KRTPEI]R:152-155,KR:[KR]R:172-173,LMNR:LXXR:200-203,RR:[KR]R:203-204,LISR:LXXR:382-385,KR:[KR]R:415-416,RR:[KR]R:603-604,VRKR:[LIJVAP]X[KRTPEI]R:605-608,KR:[KR]R:607-608,RR:[KR]R:613-614	KIMI:75-78,KFYQ:140-143,KLLA:149-152,KLLS:162-165,RDMI:173-176,KIWP:185-188,KNYL:222-225,KYFT:243-246,KDLL:270-273,HAFG:333-336,HLFW:372-375,RKFD:385-388,RKYN:392-395,KRMA:415-418,HSLP:478-481,HEYE:594-597	1	0	0	SignalP3NN:19,SignalP3HMM:19,SignalP4:19,SignalP5:19,DeepSig:19,Phobius:19,SignalP6:19	1	1
XPS76086.1	0.306	3.412	2.244	.	.	.	.	0	0	0	.	.	0	.	0	0.847	0.616	0.57	.	.	0.278	0.451	0.43	1	1	0	0	25025.7	230	3	7.147	4	66	142	72	24	131	61	34	27	0.839	LFKR:[LIJVAP]X[KRTPEI]R&LXXR:30-33,KR:[KR]R:32-33,ILKR:[LIJVAP]X[KRTPEI]R:46-49,KR:[KR]R:48-49,PAPR:[LIJVAP]X[KRTPEI]R:60-63,LVAR:LXXR:126-129,RR:[KR]R:151-152	HALT:18-21,KRIP:48-51,KPIS:89-92,RSLT:129-132,RDIC:152-155,KNLD:167-170,KPIS:209-212	1	0	0	SignalP3NN:19,SignalP3HMM:19,SignalP5:19,SignalP6:19	1	1
XPS81190.1	0.304	-1.876	3.072	.	.	.	.	0	0	0	PF00141	Domain:peroxidase	0	AA2	0	0.001	0.048	.	.	0.845	0.113	0.431	0.43	1	1	0	0	31323	297	-6	4.785	8	128	187	91	26	160	58	27	31	0.676	LLPR:[LIJVAP]X[KRTPEI]R&LXXR:21-24,LGPR:[LIJVAP]X[KRTPEI]R&LXXR:119-122,LVGR:LXXR:126-129,ASER:[LIJVAP]X[KRTPEI]R:272-275	KLLS:90-93,KGFS:158-161,KSLD:187-190,KFYQ:199-202,KGLA:217-220,RKLA:275-278,RKLG:279-282,RAFA:288-291	0	0	0	Phobius:18,SignalP3NN:20,SignalP3HMM:20,SignalP4:20,SignalP5:20,DeepSig:20,SignalP6:20	1	1
XPS68969.1	0.304	0.572	3.284	BghBEC1019,MoAVR_Pita2,MoAVR_Pita,MoCDIP11	.	.	.	0	0	0	PF13933	Domain:HRXXH	1	.	0	0.001	0.069	.	.	0.856	0.911	0.411	0.32	1	1	0	0	33642.1	319	-11	4.878	9	137	201	99	39	181	66	31	35	0.484	LAAR:LXXR:20-23,RR:[KR]R:155-156,LLHR:LXXR:181-184	HEYP:48-51,HQYI:61-64,HILR:81-84,KYFG:94-97,RPLE:156-159,HRLL:183-186	0	0	0	SignalP3NN:17,SignalP3HMM:17,SignalP4:17,SignalP5:17,DeepSig:17,Phobius:23,SignalP6:23	1	1
XPS74479.1	0.302	-2.05	2.875	.	.	.	.	0	0	0	.	.	0	GH5_7,GH5,GH5_19,GH5_18	0	0	0.046	.	.	0.823	0.014	0.37	0.45	1	1	0	0	55435	491	-9	5.075	4	149	252	119	71	266	108	52	56	1.147	AVPR:[LIJVAP]X[KRTPEI]R:18-21,KR:[KR]R:136-137,VMTR:[LIJVAP]X[KRTPEI]R:229-232,RR:[KR]R:232-233,AYIR:[LIJVAP]X[KRTPEI]R:286-289,LAPR:[LIJVAP]X[KRTPEI]R&LXXR:291-294	HAID:27-30,RLYD:41-44,HYLT:50-53,KGIN:86-89,RIMA:92-95,KGLD:125-128,RGMR:137-140,RLYA:239-242,RSLA:289-292,RQLI:294-297,HCWV:325-328,KEYP:386-389,KAIA:475-478	0	0	0	SignalP3NN:18,SignalP3HMM:18,SignalP4:18,SignalP5:18,DeepSig:18,Phobius:18,SignalP6:18	1	1
XPS78615.1	0.3	-0.229	3.243	.	.	.	.	0	0	0	PF03022	Repeat:MRJP	0	.	0	0	0.207	.	.	0.568	0.062	0.374	0.75	1	1	0	0	46953.5	427	-6	5.01	1	142	239	112	52	239	71	34	37	1.01	RR:[KR]R:235-236	KSIL:2-5,HYYY:44-47,RIFA:61-64,RPYP:85-88,KIIG:163-166,RRLT:235-238,RPFY:256-259,KTIG:261-264,RLYY:285-288,KDLQ:358-361,HPFV:363-366,RIIW:370-373,RTWP:405-408	0	1	0	SignalP3NN:17,SignalP3HMM:17,SignalP4:17,SignalP5:17,DeepSig:17,Phobius:17,SignalP6:17	1	1
XPS73481.1	0.293	-2.06	3.129	.	.	.	.	0	0	0	PF01565,PF08031	Domain:FAD_binding_4,Domain:BBE	0	AA7	0	0	0.011	.	.	0.881	0.294	0.213	0.74	1	1	0	0	60914.1	565	-2	6.11	7	207	323	179	63	327	98	50	48	0.936	LTVR:LXXR:285-288,LSYR:LXXR:382-385,LIPR:[LIJVAP]X[KRTPEI]R&LXXR:411-414,KR:[KR]R:447-448	KLLL:2-5,KLIW:8-11,KCLT:26-29,HSIM:91-94,RSIP:109-112,RILA:144-147,HDFL:152-155,KNIT:172-175,KYYT:182-185,HSIL:230-233,RAYD:288-291,KPLT:345-348,KEIL:358-361,KPFS:362-365,HYLG:390-393,RLIP:410-413,KVLS:426-429,KQIK:531-534,HVFY:541-544	0	0	0	SignalP3NN:21,SignalP3HMM:21,SignalP4:21,SignalP5:21,DeepSig:21,Phobius:21,SignalP6:21	1	1
XPS80982.1	0.293	-2.074	3.284	.	.	.	.	0	0	0	PF17390,PF17389	Domain:Bac_rhamnosid_C,Repeat:Bac_rhamnosid6H	0	GH78,CBM66	0	0	0.009	.	.	0.982	0.758	0.548	0.74	1	1	0	0	89082.3	832	-11	5.07	6	319	488	255	95	470	133	64	69	0.974	KR:[KR]R:378-379,LNGR:LXXR:781-784,PEPR:[LIJVAP]X[KRTPEI]R:816-819	RLIQ:123-126,RIWQ:174-177,RTIQ:181-184,KPIA:232-235,KGFS:236-239,HRLK:291-294,RNLS:337-340,KPLD:431-434,KEWA:469-472,RMLD:477-480,HALQ:524-527,HLWS:557-560,KQLS:604-607,RKLI:625-628,KELL:650-653,HAWA:692-695,REWQ:717-720,KKLS:799-802,KAIP:813-816	1	0	0	SignalP6:17,SignalP3NN:21,SignalP4:21,SignalP5:21,DeepSig:21,Phobius:21	1	0
XPS67760.1	0.291	1.007	3.297	.	.	.	.	0	0	0	PF11327	Family:Egh16-like	1	.	0	0.019	0.016	.	.	0.587	0.893	0.341	0.69	1	1	0	0	30586.3	317	3.5	8.337	5	161	225	102	10	202	46	25	21	0.32	ARRR:[LIJVAP]X[KRTPEI]R:126-129,RR:[KR]R:127-128,ARKR:[LIJVAP]X[KRTPEI]R:298-301,KR:[KR]R:300-301,LKKR:[LIJVAP]X[KRTPEI]R&LXXR:307-310,KR:[KR]R:309-310	RQLL:129-132,RQIN:199-202,KRME:309-312	0	0	0	SignalP3NN:18,SignalP3HMM:18,SignalP4:18,DeepSig:18,SignalP6:18,SignalP5:20,Phobius:20	1	1
XPS74490.1	0.285	-2.081	2.4	.	.	.	.	0	0	0	PF00150	Domain:Cellulase	0	GH5_15,GH5_9,GH5_50,GH5,GH5_45,GH5_14,GH5_49,GH5_22,GH5_54,GH5_46,GH5_47,GH5_37,GH5_44,GH5_4,GH5_8,GH5_39,GH5_23,GH5_25,GH5_52,GH5_36,GH5_33,GH5_5,GH5_38	0	0	0.147	.	.	0.861	0.18	0.383	0.34	1	1	0	0	43704.3	387	1.5	6.72	4	120	200	104	60	212	95	51	44	1.057	KR:[KR]R:235-236	HKIR:24-27,KDMG:47-50,KHWD:75-78,REYG:90-93,HWFV:103-106,KYLD:122-125,KNIS:134-137,HTLP:158-161,RAYI:173-176,RNMT:179-182,KAYS:217-220,RDLK:227-230,KRLT:235-238,HRYL:267-270,KPLV:298-301,HDWY:327-330,RQWW:331-334,KGWV:345-348,KQFG:376-379,KAMA:382-385	0	0	0	SignalP3NN:19,SignalP3HMM:19,SignalP4:19,SignalP5:19,DeepSig:19,Phobius:19,SignalP6:19	1	1
XPS73272.1	0.285	-2.064	2.528	.	.	.	.	0	0	0	PF01565,PF08031	Domain:FAD_binding_4,Domain:BBE	0	AA7	0	0	0.06	.	.	0.743	0.329	0.46	0.76	1	1	0	0	55674.8	510	2.5	6.878	4	182	281	155	69	291	100	54	46	1.112	AGIR:[LIJVAP]X[KRTPEI]R:405-408	RFLE:4-7,KSLA:44-47,KIYY:55-58,KNLV:141-144,KKLT:153-156,HGWL:185-188,HGLI:192-195,KTID:212-215,HNFG:229-232,KIYD:240-243,HNWS:283-286,KPFH:319-322,HDLG:337-340,KSYN:367-370,KAYE:376-379,HILA:423-426,KQLG:444-447,REII:451-454,HTYV:464-467,KSWY:477-480,KALK:491-494	0	0	0	SignalP6:24,SignalP3NN:25,SignalP5:25,DeepSig:25,Phobius:25	1	0
XPS76197.1	0.284	-6.495	-1.304	.	.	.	.	0	0	0	.	.	0	.	0	0	0.009	.	.	0.884	0.372	0.416	0.27	0	0	0	0	61435.4	564	4.5	7.022	8	210	331	155	49	268	126	69	57	0.701	RR:[KR]R:54-55,RR:[KR]R:112-113,LSFR:LXXR:119-122,KR:[KR]R:251-252,RR:[KR]R:363-364,LDPR:[LIJVAP]X[KRTPEI]R&LXXR:368-371,LRGR:LXXR:372-375,LSLR:LXXR:473-476,KR:[KR]R:494-495	RGLV:18-21,HHFA:29-32,HTMN:39-42,RAYK:55-58,RRIL:112-115,KSLS:117-120,HTFS:162-165,RSME:276-279,HTLR:291-294,HCWI:465-468,RDLV:487-490,KRFD:494-497,RNLE:528-531	1	0	0	.	0	0
XPS77909.1	0.284	2.718	3.275	.	.	.	.	0	0	0	.	.	0	.	0	0.863	0.275	0.602	.	.	0.02	0.426	0.38	1	1	0	0	5958.83	53	5	10.618	1	19	26	14	5	26	12	9	3	0.583	LATR:[LIJVAP]X[KRTPEI]R&LXXR:22-25,LVTR:[LIJVAP]X[KRTPEI]R&LXXR:33-36,KR:[KR]R:49-50	HAFA:15-18,RSLA:20-23,RNLE:25-28	1	0	0	SignalP3NN:18,SignalP3HMM:18,SignalP4:18,SignalP5:18,DeepSig:18,SignalP6:18,Phobius:23	1	1
XPS69983.1	0.282	-2.138	3.24	.	.	.	.	0	0	0	PF00732,PF05199	Domain:GMC_oxred_N,Domain:GMC_oxred_C	0	AA3_2,AA3,AA3_3,AA3_1	0	0	0.01	.	.	0.932	0.011	0.48	0.73	1	1	0	0	66827.1	623	7.5	8.584	4	211	357	204	59	369	119	65	54	0.888	PNIR:[LIJVAP]X[KRTPEI]R:74-77,RR:[KR]R:211-212,KR:[KR]R:274-275,LVAR:LXXR:276-279,KR:[KR]R:297-298,PLIR:[LIJVAP]X[KRTPEI]R:492-495,RR:[KR]R:622-623	KTWN:106-109,KGWG:144-147,KSYW:199-202,KAFE:203-206,RRLV:211-214,HVLL:256-259,KRLV:274-277,RELV:298-301,KLLQ:311-314,KAIL:321-324,HPYT:345-348,KKLL:432-435,KVLA:443-446,KPLS:474-477,KSML:505-508,RYIR:513-516,HGIE:583-586	0	0	0	SignalP3NN:19,SignalP3HMM:19,SignalP4:19,SignalP5:19,DeepSig:19,Phobius:19,SignalP6:19	1	1
XPS81854.1	0.282	-1.838	3.111	.	.	.	.	0	0	0	PF01565	Domain:FAD_binding_4	0	AA7	0	0	0.012	.	.	0.781	0.218	0.285	0.69	1	1	0	0	60162.2	552	-9	5.268	3	198	310	153	87	318	106	52	54	0.978	PVTR:[LIJVAP]X[KRTPEI]R:64-67,LGPR:[LIJVAP]X[KRTPEI]R&LXXR:185-188,RR:[KR]R:514-515,LLNR:LXXR:528-531	RHFV:26-29,RIWT:79-82,KIFP:86-89,KDLF:239-242,KAIS:313-316,RQFT:324-327,KFYP:348-351,KELD:364-367,REFY:380-383,HTIW:418-421,RDFQ:480-483,RRLT:514-517,KGFA:543-546	0	0	0	SignalP3NN:19,SignalP3HMM:19,SignalP4:19,SignalP5:19,DeepSig:19,Phobius:19,SignalP6:19	1	1
XPS81381.1	0.282	-2.156	3.291	.	.	.	.	0	0	0	PF02065,PF16875,PF16874	Family:Melibiase,Domain:Glyco_hydro_36N,Domain:Glyco_hydro_36C	0	GH36	0	0	0.009	.	.	0.978	0.264	0.496	0.45	1	1	0	0	81643.9	744	-16	5.232	4	239	419	213	109	416	153	75	78	1	RR:[KR]R:81-82,VIER:[LIJVAP]X[KRTPEI]R:181-184,RR:[KR]R:214-215	KLFA:6-9,REFP:82-85,HEIV:115-118,RSFK:168-171,HEFN:208-211,RALL:277-280,RSYH:316-319,RPIL:336-339,RTLT:462-465,RGMH:504-507,HVIE:524-527,HYWP:554-557,HELS:624-627,HRIN:642-645,RYFN:705-708,KLIW:737-740	0	0	0	SignalP3NN:19,SignalP3HMM:19,SignalP4:19,SignalP5:19,DeepSig:19,Phobius:19,SignalP6:19	1	1
XPS70530.1	0.282	-1.906	3.274	.	.	.	.	0	0	0	PF01915,PF00933,PF14310	Domain:Glyco_hydro_3_C,Domain:Glyco_hydro_3,Family:Fn3-like	0	GH3	0	0	0.009	.	.	0.928	0.973	0.345	0.46	1	1	0	0	83494.2	766	-13.5	5.207	6	246	437	228	96	435	158	77	81	0.885	AVPR:[LIJVAP]X[KRTPEI]R:88-91,LMLR:LXXR:129-132,LITR:[LIJVAP]X[KRTPEI]R&LXXR:183-186,RR:[KR]R:208-209,LPLR:LXXR:388-391,AGIR:[LIJVAP]X[KRTPEI]R:526-529,ITPR:[LIJVAP]X[KRTPEI]R:618-621,APER:[LIJVAP]X[KRTPEI]R:698-701,LDRR:[LIJVAP]X[KRTPEI]R&LXXR:724-727,RR:[KR]R:726-727	KSFD:2-5,KDLV:60-63,RDLM:127-130,HAIG:135-138,REYR:139-142,KGIH:144-147,RNWE:165-168,KHWL:198-201,RRMP:208-211,HELY:228-231,KLLN:263-266,KFWG:305-308,RLLA:331-334,HFYL:336-339,KDFP:343-346,HPIV:357-360,REIG:371-374,RFLN:394-397,KAIQ:452-455,RIIA:457-460,HDFS:502-505,HLLN:584-587,RAFD:611-614,KNIT:616-619,RQLR:701-704,REIE:718-721,RDLS:727-730,KVWV:747-750,RDIR:755-758	0	0	0	SignalP3NN:20,SignalP4:20,SignalP5:20,Phobius:22,SignalP6:22	1	0
XPS80926.1	0.282	-1.716	2.686	.	.	.	.	0	0	0	PF05199,PF00732	Domain:GMC_oxred_C,Domain:GMC_oxred_N	0	AA3_2,AA3,AA3_1,AA3_3	0	0	0.05	.	.	0.699	0.981	0.606	0.71	1	1	0	0	68172.1	641	-15	4.818	4	233	398	201	73	368	135	63	72	0.803	LAAR:LXXR:38-41,LYPR:[LIJVAP]X[KRTPEI]R&LXXR:125-128,KR:[KR]R:262-263,LDVR:LXXR:287-290,LGNR:LXXR:426-429,AHPR:[LIJVAP]X[KRTPEI]R:489-492,ALTR:[LIJVAP]X[KRTPEI]R:535-538,AFKR:[LIJVAP]X[KRTPEI]R:540-543,KR:[KR]R:542-543,VFPR:[LIJVAP]X[KRTPEI]R:611-614	RQFV:4-7,KTLL:48-51,KHYA:86-89,RDFK:96-99,RKYF:169-172,HGYE:187-190,REFV:267-270,KMYP:283-286,HSIP:370-373,RGIY:429-432,RGYF:465-468,HNLF:479-482	0	0	0	SignalP3NN:18,SignalP4:18,Phobius:18,SignalP6:18	1	0
XPS71457.1	0.282	-1.899	3.301	.	.	.	.	0	0	0	PF01915,PF00933,PF14310	Domain:Glyco_hydro_3_C,Domain:Glyco_hydro_3,Family:Fn3-like	0	GH3	0	0	0.046	.	.	0.934	0.025	0.386	0.56	1	1	0	0	93415.7	869	-10.5	5.388	7	297	519	250	98	503	168	83	85	0.762	LGPR:[LIJVAP]X[KRTPEI]R&LXXR:18-21,LGIR:[LIJVAP]X[KRTPEI]R&LXXR:100-103,LMHR:LXXR:125-128,RR:[KR]R:128-129,LDDR:LXXR:218-221,AVTR:[LIJVAP]X[KRTPEI]R:333-336,VTPR:[LIJVAP]X[KRTPEI]R:637-640,LPNR:LXXR:669-672,LRLR:LXXR:811-814,LHLR:LXXR:850-853	HSLL:2-5,KDLM:123-126,KGIN:140-143,RNWE:161-164,KHLI:194-197,RDYS:205-208,RTMH:221-224,RILA:336-339,KIFG:419-422,KLIQ:528-531,HDLP:556-559,RSLM:576-579,RHFH:630-633,HGLS:645-648,RDFE:795-798,KDLS:818-821,KIWL:840-843	0	0	0	SignalP4:15,SignalP6:15,SignalP5:16,Phobius:16,SignalP3NN:19,SignalP3HMM:19,DeepSig:19	1	1
XPS73013.1	0.282	-2.393	2.831	.	.	.	.	0	0	0	PF14498	Domain:Glyco_hyd_65N_2	0	GH95	0	0	0.047	.	.	0.984	0.506	0.407	0.55	1	1	0	0	87307.6	811	-6.5	6.018	7	298	469	234	99	464	155	80	75	0.679	RR:[KR]R:2-3,LVTR:[LIJVAP]X[KRTPEI]R&LXXR:16-19,LRER:[LIJVAP]X[KRTPEI]R&LXXR:133-136,KR:[KR]R:146-147,ASTR:[LIJVAP]X[KRTPEI]R:308-311,LTSR:LXXR:332-335,LIAR:LXXR:354-357,LQGR:LXXR:394-397,LYSR:LXXR:658-661,LVLR:LXXR:768-771,LKNR:LXXR:791-794	HTLS:21-24,REWV:96-99,RVLG:121-124,RRLD:147-150,KTLE:316-319,KLLY:452-455,HVFD:493-496,KGFQ:595-598,KEWK:606-609,RHLS:624-627,KLYS:657-660,KVWR:675-678,KGLV:766-769	0	0	0	SignalP3NN:22,SignalP3HMM:22,SignalP4:22,SignalP5:22,DeepSig:22,Phobius:22,SignalP6:22	1	1
XPS81069.1	0.282	-0.146	3.217	FoSep1	.	.	.	0	0	0	PF00082,PF06280	Domain:Peptidase_S8,Domain:fn3_5	0	.	0	0	0.009	.	.	0.962	0.482	0.364	0.66	1	1	0	0	95628.2	894	-21	4.828	7	328	535	268	95	506	180	84	96	0.716	VHPR:[LIJVAP]X[KRTPEI]R:23-26,LSFR:LXXR:82-85,ITTR:[LIJVAP]X[KRTPEI]R:121-124,KR:[KR]R:140-141,LSQR:LXXR:411-414,LTMR:LXXR:453-456,KR:[KR]R:582-583,RR:[KR]R:585-586,LKHR:LXXR:664-667,VYIR:[LIJVAP]X[KRTPEI]R:804-807,KR:[KR]R:875-876	HRMD:78-81,RFFK:85-88,RQMK:108-111,HVMT:152-155,KGYR:168-171,RMWG:259-262,KPLP:402-405,RFMV:443-446,HWLS:479-482,RVLT:553-556,KRLR:582-585,RILT:586-589,KPLA:593-596,HTFS:648-651,KVLG:824-827,RAYF:843-846,RVLD:854-857,KVMA:864-867,RIFG:869-872	1	1	0	SignalP3NN:20,SignalP3HMM:20,SignalP4:20,SignalP5:20,DeepSig:20,Phobius:20,SignalP6:20	1	1
XPS73111.1	0.282	-2.141	3.121	.	.	.	.	0	0	0	PF07971,PF17678	Repeat:Glyco_hydro_92,Domain:Glyco_hydro_92N	0	GH92	0	0	0.029	.	.	0.962	0.489	0.557	0.39	1	1	0	0	90613.5	819	-26	4.636	7	267	466	203	121	454	174	78	96	1.033	LDNR:LXXR:121-124,KR:[KR]R:129-130,LNDR:LXXR:277-280,PSER:[LIJVAP]X[KRTPEI]R:366-369,PGER:[LIJVAP]X[KRTPEI]R:536-539,VMPR:[LIJVAP]X[KRTPEI]R:566-569,LRIR:[LIJVAP]X[KRTPEI]R&LXXR:741-744	RLIN:5-8,RTYW:124-127,KRIG:129-132,HLYT:162-165,HVLV:173-176,HYLP:180-183,RSWD:187-190,KAFK:240-243,RHFR:252-255,HLIP:363-366,HLIQ:401-404,RALI:413-416,KGLR:453-456,RELY:539-542,RSWD:551-554,RNFT:560-563,KTYN:577-580,RVID:611-614,KQWK:669-672,RQLA:678-681,KTLR:739-742,KNWF:771-774,KVWE:798-801	0	0	0	SignalP3NN:20,SignalP4:20,SignalP5:20,DeepSig:20,Phobius:20,SignalP6:20	1	0
XPS71031.1	0.282	0.015	3.244	CfTom1	.	.	.	0	0	0	PF16862,PF00150	Domain:Glyco_hydro_79C,Domain:Cellulase	0	GH79	0	0	0.013	.	.	0.881	0.045	0.309	0.45	1	1	0	0	58044.5	537	-6	5.721	4	197	324	158	71	294	109	55	54	0.91	VLER:[LIJVAP]X[KRTPEI]R:74-77,PIIR:[LIJVAP]X[KRTPEI]R:85-88,LEVR:LXXR:231-234,KR:[KR]R:265-266,LYPR:[LIJVAP]X[KRTPEI]R&LXXR:377-380,KR:[KR]R:384-385,KR:[KR]R:476-477,IAIR:[LIJVAP]X[KRTPEI]R:518-521	HAYP:17-20,HKLE:28-31,HPII:84-87,KSWD:127-130,KFIS:137-140,KGLA:153-156,REWK:193-196,REID:200-203,RWWA:218-221,HSYA:255-258,KEIY:287-290,RTLP:389-392,RALD:412-415,KPYY:445-448,KRLT:476-479	0	1	0	SignalP3NN:18,SignalP3HMM:18,SignalP4:18,SignalP5:18,DeepSig:18,Phobius:18,SignalP6:18	1	1
XPS79968.1	0.28	-1.914	3.233	.	.	.	.	0	0	0	PF01565	Domain:FAD_binding_4	0	AA7	0	0	0.034	.	.	0.887	0.005	0.468	0.44	1	1	0	0	54477.9	506	-2	6.107	5	174	284	162	52	294	102	52	50	0.85	LKIR:[LIJVAP]X[KRTPEI]R&LXXR:309-312,APKR:[LIJVAP]X[KRTPEI]R:317-320,KR:[KR]R:319-320,LNSR:LXXR:337-340	KSLA:18-21,KVLT:41-44,RSID:65-68,KILN:86-89,KDLA:132-135,RAMR:215-218,HHIG:235-238,KLYN:254-257,HDFT:260-263,HTFY:291-294,RGIA:312-315,RSYT:321-324,RLLN:335-338,RTYT:344-347,KEIR:359-362,KPFL:370-373,RLIL:414-417,KQLT:437-440,RWLA:449-452,RALQ:485-488	1	0	0	SignalP3NN:21,SignalP3HMM:21,SignalP4:21,SignalP5:21,DeepSig:21,Phobius:21,SignalP6:21	1	1
XPS75251.1	0.279	0.748	3.304	PesCDA,VdPDA1,VnaChtBP	.	.	.	0	0	0	PF01522,PF00187	Family:Polysacc_deac_1,Domain:Chitin_bind_1	1	CE4,CBM18	0	0	0.05	.	.	0.708	0.321	0.696	0.85	1	1	0	0	86169.8	837	-2	6.338	38	416	598	176	78	403	147	78	69	0.728	VKIR:[LIJVAP]X[KRTPEI]R:35-38,PSPR:[LIJVAP]X[KRTPEI]R:40-43,LLVR:LXXR:57-60,ASTR:[LIJVAP]X[KRTPEI]R:119-122,VIKR:[LIJVAP]X[KRTPEI]R:195-198,KR:[KR]R:197-198,LQAR:LXXR:330-333	KLFG:27-30,HHLL:55-58,KRMY:197-200,HTWS:209-212,RNII:236-239,KNLG:262-265,HDIH:312-315,RGFK:333-336,KCWY:834-837	0	0	0	SignalP3NN:18,SignalP4:18,SignalP6:18,SignalP5:20,Phobius:20	1	0
XPS80981.1	0.279	-0.052	2.585	PpCBEL	.	.	.	0	0	0	PF14295	Domain:PAN_4	0	.	0	0	0.03	.	.	0.681	0.075	0.466	0.81	1	1	0	0	62179.5	605	-10.5	4.529	22	290	427	179	40	318	73	32	41	0.775	LPIR:[LIJVAP]X[KRTPEI]R&LXXR:23-26,LSQR:LXXR:27-30,PVIR:[LIJVAP]X[KRTPEI]R:494-497	KTLV:15-18,RSFQ:68-71,KTYL:136-139,KIIC:146-149,KSYT:232-235,HVWT:300-303,RPYT:527-530,RILS:575-578	0	0	0	SignalP3NN:20,SignalP3HMM:20,SignalP4:20,SignalP5:20,DeepSig:20,Phobius:20,SignalP6:30	1	1
XPS78472.1	0.278	-4.004	0.83	.	.	.	.	0	0	0	.	.	0	.	0	0	0.004	.	.	0.727	0.314	0.435	0.87	1	1	0	0	21995.3	227	-2	4.636	9	139	171	76	12	129	20	9	11	0.324	ITPR:[LIJVAP]X[KRTPEI]R:22-25,LGKR:[LIJVAP]X[KRTPEI]R&LXXR:28-31,KR:[KR]R:30-31	.	0	1	0	SignalP3NN:16,SignalP3HMM:16,SignalP4:16,SignalP5:16,DeepSig:16,Phobius:16,SignalP6:31	1	1
XPS73791.1	0.278	-2.059	1.271	MoCDIP11,GoEC2,BghBEC4,BghBEC2,MoCDIP2	.	.	.	0	0	0	PF05730	Domain:CFEM	1	.	0	0	0.004	.	.	0.911	0.138	0.641	0.83	1	1	0	0	17519.6	192	-1	4.71	8	129	161	86	3	120	11	5	6	0.151	.	.	0	0	0	SignalP3NN:18,SignalP3HMM:18,SignalP4:18,SignalP5:18,DeepSig:18,Phobius:18,SignalP6:18	1	1
XPS70766.1	0.278	0.786	1.064	BghBEC3	.	.	.	0	0	0	.	.	0	.	0	0	0.063	.	0.662	.	0.881	0.508	0.9	1	1	0	0	25064.8	258	1	7.152	16	155	199	80	15	151	5	3	2	0.469	LQPR:[LIJVAP]X[KRTPEI]R&LXXR:61-64,LIAR:LXXR:164-167	.	0	1	0	SignalP3NN:17,SignalP3HMM:17,SignalP4:17,SignalP5:17,DeepSig:17,SignalP6:17,Phobius:33	1	1
XPS73717.1	0.276	-0.2	-1.293	.	.	.	.	0	0	0	PF00403,PF00080	Domain:HMA,Domain:Sod_Cu	0	.	0	0.961	0.915	.	.	0.546	0.111	0.414	0.15	0	0	0	0	25941.6	244	0.5	6.696	6	88	140	76	13	133	60	31	29	0.842	LSIR:[LIJVAP]X[KRTPEI]R&LXXR:112-115	KDIE:21-24,RGLV:95-98,RGLS:115-118,RGIF:156-159,RPIQ:176-179,RSIV:186-189,RGML:241-244	0	0	0	.	0	0
XPS69691.1	0.276	-1.955	3.285	.	.	.	.	0	0	0	.	.	0	.	0	0	0.009	.	.	0.928	0.672	0.439	0.4	1	1	0	0	80338.5	721	7.5	7.438	3	223	395	198	101	402	150	83	67	0.953	AHIR:[LIJVAP]X[KRTPEI]R:242-245,LQRR:[LIJVAP]X[KRTPEI]R&LXXR:344-347,RR:[KR]R:346-347,KR:[KR]R:540-541,ANIR:[LIJVAP]X[KRTPEI]R:623-626	KWLQ:4-7,KSLI:36-39,KGLP:92-95,HTLQ:246-249,RLFR:266-269,HRYT:281-284,RSIS:286-289,REWN:319-322,RRII:346-349,KIFP:403-406,HPFY:456-459,KVLT:479-482,RNLA:520-523,RKLQ:541-544,RSLI:589-592,RVWE:615-618,RGWG:626-629,RAIY:645-648	1	0	0	SignalP3NN:20,SignalP4:20,SignalP5:20,DeepSig:20,Phobius:20,SignalP6:20	1	0
XPS75084.1	0.276	3.23	3.312	MoCDIP4	.	.	.	0	0	0	.	.	0	AA11,CBM19,AA9	0	0.006	0.128	.	0.674	.	0.174	0.496	0.71	1	1	0	0	32416.1	322	-2.5	5.625	10	154	223	80	26	189	52	26	26	0.541	IARR:[LIJVAP]X[KRTPEI]R:308-311,RR:[KR]R:310-311	HMFI:20-23,KVIH:102-105,REMY:151-154,KDLC:213-216,RDYT:311-314	0	0	0	SignalP3NN:19,SignalP3HMM:19,SignalP4:19,SignalP5:19,DeepSig:19,Phobius:19,SignalP6:19	1	1
XPS80482.1	0.273	2.894	-0.239	.	.	.	.	0	0	0	.	.	0	.	0	0.999	0.877	0.599	0.714	.	0.96	0.39	0.37	1	1	1	0	21725.6	195	2	6.865	11	63	109	48	24	102	46	26	20	1.343	RR:[KR]R:43-44,LAPR:[LIJVAP]X[KRTPEI]R&LXXR:153-156,LLQR:LXXR:185-188,KR:[KR]R:189-190	RKFT:8-11,KQMP:36-39,KDWN:59-62,HCIH:63-66,KCIF:97-100,KNFL:115-118,RTLD:156-159	0	0	0	SignalP3HMM:22,SignalP4:22,SignalP5:22,Phobius:22	0	1
XPS76821.1	0.271	-0.87	1.026	.	.	.	.	0	0	0	.	.	0	.	0	0.836	0.4	.	.	0.662	0.118	0.342	0.45	1	1	0	0	16942.8	160	6	9.97	2	61	92	66	12	98	23	15	8	0.846	AVPR:[LIJVAP]X[KRTPEI]R:21-24,LTVR:LXXR:32-35,VGIR:[LIJVAP]X[KRTPEI]R:134-137	RMMD:82-85,KNFT:117-120	0	0	0	SignalP3NN:21,SignalP3HMM:21,SignalP4:21,SignalP5:21,DeepSig:21,Phobius:21,SignalP6:21	1	1
XPS77245.1	0.27	-0.589	3.309	.	.	.	.	0	0	0	PF01328	Family:Peroxidase_2	0	.	0	0	0.145	.	.	0.624	0.182	0.385	0.74	1	1	0	0	55409.2	523	2	6.976	10	199	316	136	65	314	81	43	38	0.884	KR:[KR]R:31-32,IIKR:[LIJVAP]X[KRTPEI]R:36-39,KR:[KR]R:38-39,VKER:[LIJVAP]X[KRTPEI]R:55-58,LDKR:[LIJVAP]X[KRTPEI]R&LXXR:78-81,KR:[KR]R:80-81,RR:[KR]R:343-344	RGLD:32-35,HPMG:89-92,KKFP:103-106,HGYI:133-136,HNLN:232-235,KAYV:329-332,RAYP:344-347	1	0	0	SignalP3NN:17,SignalP3HMM:17,SignalP4:17,SignalP5:17,Phobius:17,SignalP6:17	1	1
XPS72984.1	0.269	-1.412	3.296	.	.	.	.	0	0	0	PF07732,PF07731,PF00394	Domain:Cu-oxidase_3,Domain:Cu-oxidase_2,Domain:Cu-oxidase	0	AA1_2,AA1,AA1_3,AA1_1	0	0	0.015	.	.	0.742	0.86	0.298	0.7	1	1	0	0	59301.2	555	2.5	6.74	7	188	330	169	62	323	91	51	40	0.925	AGKR:[LIJVAP]X[KRTPEI]R:203-206,KR:[KR]R:205-206,IGTR:[LIJVAP]X[KRTPEI]R:358-361,PVKR:[LIJVAP]X[KRTPEI]R:450-453,KR:[KR]R:452-453,LQGR:LXXR:501-504	HGMF:79-82,HWYH:118-121,KAWE:141-144,RQMP:163-166,KEYL:170-173,KRYL:205-208,KPLD:331-334,KLLS:337-340,HPYP:416-419,HPMH:420-423,HVFQ:427-430,RGLG:434-437	0	0	0	SignalP3NN:18,SignalP3HMM:18,SignalP4:18,SignalP5:18,DeepSig:18,Phobius:18,SignalP6:18	1	1
XPS74453.1	0.269	-2.234	2.564	.	.	.	.	0	0	0	.	.	0	.	0	0	0.097	.	.	0.909	0.447	0.421	0.42	1	1	0	0	40436.6	358	-12	4.506	2	101	194	111	48	205	74	32	42	1.2	LENR:LXXR:78-81,ILTR:[LIJVAP]X[KRTPEI]R:83-86,KR:[KR]R:283-284,INRR:[LIJVAP]X[KRTPEI]R:315-318,RR:[KR]R:317-318	KHWP:33-36,RALS:41-44,RGIL:81-84,KLID:94-97,RELK:137-140,KQIV:240-243,HLWI:312-315,KNWV:347-350	0	0	0	SignalP3NN:18,SignalP3HMM:18,SignalP4:18,SignalP5:18,Phobius:18,SignalP6:18	1	1
XPS80693.1	0.266	0.44	3.305	MoCDIP4	.	.	.	0	0	0	.	.	0	AA11,CBM19	0	0	0.011	.	.	0.748	0.248	0.52	0.66	1	1	0	0	40808.2	416	-3.5	5.539	12	219	307	134	30	255	48	24	24	0.354	LCNR:LXXR:369-372,VSKR:[LIJVAP]X[KRTPEI]R:395-398,KR:[KR]R:397-398,LHKR:[LIJVAP]X[KRTPEI]R&LXXR:405-408,KR:[KR]R:407-408	HMIL:18-21,KTIS:65-68,KVIH:97-100,REFY:152-155,RSFP:398-401	0	0	0	SignalP3NN:17,SignalP3HMM:17,SignalP4:17,SignalP5:17,DeepSig:17,Phobius:17,SignalP6:17	1	1
XPS73000.1	0.265	0.983	3.204	FoSep1	.	.	.	0	0	0	PF00082,PF05922	Domain:Peptidase_S8,Domain:Inhibitor_I9	0	.	0	0	0.124	.	.	0.775	0.987	0.56	0.64	1	1	0	0	42431.1	407	-4.5	5.406	1	171	259	139	38	228	79	39	40	0.684	LSAR:LXXR:24-27,LAKR:[LIJVAP]X[KRTPEI]R&LXXR:65-68,KR:[KR]R:67-68	KYIV:36-39,REIH:58-61,RNLA:63-66,REYG:80-83,KGYA:88-91,KSLP:103-106,KTYG:204-207,KVFE:218-221,RGLE:366-369,RVLE:380-383	0	0	0	SignalP3NN:21,SignalP3HMM:21,SignalP4:21,SignalP5:21,DeepSig:21,SignalP6:21,Phobius:26	1	1
XPS70360.1	0.265	-2.638	-1.302	.	.	.	.	0	0	0	PF00466,PF00428,PF17777	Family:Ribosomal_L10,Family:Ribosomal_60s,Domain:RL10P_insert	0	.	0	0.009	0.29	0.5	.	.	0.276	0.41	0.17	0	0	0	0	33766.3	316	-9	4.734	0	106	171	105	26	178	77	35	42	0.975	RR:[KR]R:60-61,LANR:LXXR:101-104,LKDR:LXXR:263-266	KAIY:8-11,KEYS:20-23,HEIR:39-42,RALK:61-64,RLLP:75-78,KDIR:94-97,KILA:99-102,HQIY:188-191,KAFS:211-214,KVIS:245-248	0	0	0	.	0	0
XPS72262.1	0.265	0.34	-1.302	.	.	.	.	0	0	0	PF01965	Domain:DJ-1_PfpI	0	.	0	0.957	0.662	0.613	.	.	0.846	0.403	0.05	0	0	0	0	21618.8	202	-2.5	5.342	1	70	109	69	13	112	47	23	24	0.812	VLTR:[LIJVAP]X[KRTPEI]R:23-26,KR:[KR]R:188-189	KALI:3-6,RNIR:48-51,KTFS:81-84,KEIE:143-146,KGWE:148-151,KVIT:162-165	0	0	0	.	0	0
XPS70027.1	0.264	-1.819	3.187	.	.	.	.	0	0	0	PF04616,PF17851	Family:Glyco_hydro_43,Domain:GH43_C2	0	GH43_14,GH43_12,GH43_13,GH43_11,GH43,GH43_10,GH43_9,GH43_3,GH43_34,GH43_31,GH43_5,GH43_36,GH43_4,GH43_15,CBM91,GH43_30,GH43_32,GH43_29,GH43_2,GH43_19	0	0	0.045	.	.	0.93	0.971	0.337	0.44	1	1	0	0	69503.7	621	-9	5.651	2	191	330	159	98	348	131	66	65	0.906	LRYR:LXXR:102-105,ALPR:[LIJVAP]X[KRTPEI]R:119-122,LAVR:LXXR:283-286,LHWR:LXXR:371-374,ISRR:[LIJVAP]X[KRTPEI]R:417-420,RR:[KR]R:419-420,AHTR:[LIJVAP]X[KRTPEI]R:422-425,LAPR:[LIJVAP]X[KRTPEI]R&LXXR:466-469,IPER:[LIJVAP]X[KRTPEI]R:494-497,PYIR:[LIJVAP]X[KRTPEI]R:501-504,AYRR:[LIJVAP]X[KRTPEI]R:512-515,RR:[KR]R:514-515,PARR:[LIJVAP]X[KRTPEI]R:555-558,RR:[KR]R:557-558	RLYL:2-5,HYYG:147-150,KWLW:193-196,HVYE:208-211,KHMV:228-231,RSLH:237-240,HFLH:369-372,KNYI:379-382,RNLT:469-472,RFIP:492-495,KLLF:536-539,RVFG:566-569	0	0	0	SignalP3NN:18,SignalP3HMM:18,SignalP4:18,SignalP5:18,DeepSig:18,Phobius:18,SignalP6:18	1	1
XPS70925.1	0.264	-2.011	3.153	.	.	.	.	0	0	0	PF00264,PF18132	Domain:Tyrosinase,Domain:Tyosinase_C	0	.	0	0	0.045	.	.	0.954	0.48	0.348	0.31	1	1	0	0	68975.7	612	-1.5	6.346	2	188	322	158	92	340	122	64	58	0.881	KR:[KR]R:29-30,ADTR:[LIJVAP]X[KRTPEI]R:40-43,LEVR:LXXR:53-56,RR:[KR]R:256-257,AFRR:[LIJVAP]X[KRTPEI]R:266-269,RR:[KR]R:268-269,LYQR:LXXR:329-332,LPFR:LXXR:365-368,PFRR:[LIJVAP]X[KRTPEI]R:366-369,RR:[KR]R:368-369,KR:[KR]R:489-490,AEKR:[LIJVAP]X[KRTPEI]R:495-498,KR:[KR]R:497-498,LRER:[LIJVAP]X[KRTPEI]R&LXXR:540-543,PVRR:[LIJVAP]X[KRTPEI]R:597-600,RR:[KR]R:599-600	RQLS:30-33,RDMQ:56-59,KPYQ:96-99,HKIG:109-112,HSMA:119-122,RPYL:129-132,RSIE:198-201,HTIR:229-232,RSIQ:257-260,HGWV:283-286,HMWP:303-306,RLFA:325-328,RLFG:384-387,KHFT:427-430,RSIR:490-493,RKLQ:526-529,KIYS:547-550,HEFL:591-594,RTLR:609-612	0	0	0	Phobius:18,SignalP3NN:21,SignalP3HMM:21,SignalP4:21,SignalP5:21,DeepSig:21,SignalP6:21	1	1
XPS70358.1	0.264	-3.235	-1.302	.	.	.	.	0	0	0	PF07992	Domain:Pyr_redox_2	0	.	0	0	0.142	0.533	.	.	0.95	0.653	0.03	0	0	0	0	38393.3	356	-10	4.91	4	118	189	109	30	192	100	47	53	0.816	LKSR:LXXR:90-93,RR:[KR]R:127-128,LVRR:[LIJVAP]X[KRTPEI]R&LXXR:186-189,RR:[KR]R:188-189,RR:[KR]R:200-201	RPFK:93-96,HPMG:100-103,RRLD:127-130,KYWG:136-139,RRLT:200-203,KGLF:248-251,KKYR:298-301,KFLA:319-322	1	0	0	.	0	0
XPS77759.1	0.263	-1.591	3.292	.	.	.	.	0	0	0	.	.	0	.	0	0.028	0.045	.	.	0.866	0.645	0.238	0.61	1	1	0	0	5413.38	52	3.5	8.562	2	23	32	20	6	36	7	6	1	0.222	ATKR:[LIJVAP]X[KRTPEI]R:34-37,KR:[KR]R:36-37	HSLP:49-52	0	0	0	SignalP3NN:20,SignalP4:20,SignalP5:20,DeepSig:20,Phobius:24,SignalP3HMM:28	1	1
XPS72743.1	0.26	1.071	2.986	.	.	.	.	0	0	0	PF03009	Family:GDPD	0	.	0	0	0.181	.	0.558	.	0.004	0.298	0.66	1	1	0	0	47177.1	431	-7.5	4.98	10	148	246	122	54	247	86	41	45	1.029	PTTR:[LIJVAP]X[KRTPEI]R:17-20,LGPR:[LIJVAP]X[KRTPEI]R&LXXR:40-43,LVCR:LXXR:116-119,ILTR:[LIJVAP]X[KRTPEI]R:131-134	RSYP:20-23,RPYY:43-46,RGLV:114-117,HSLC:120-123,KVLT:205-208,RNFT:223-226,KGYT:241-244,KSID:259-262,RIWP:265-268,HDFG:284-287,KTIV:336-339,KGLF:403-406	0	0	0	DeepSig:15,SignalP3NN:21,SignalP3HMM:21,SignalP4:21,SignalP5:21,Phobius:21,SignalP6:21	1	1
XPS77522.1	0.26	-0.803	3.297	.	.	.	.	0	0	0	PF00264	Domain:Tyrosinase	0	.	0	0	0.217	.	.	0.837	0.037	0.628	0.6	1	1	0	0	45430.3	418	6.5	8.077	8	154	239	103	44	224	74	42	32	1.022	KR:[KR]R:75-76,KR:[KR]R:271-272	HALP:18-21,KSYT:99-102,HRYF:151-154,KNMK:238-241,RCLK:268-271,RNLT:272-275,KKWA:280-283,KDIE:296-299,RDLY:330-333,HGMI:345-348,KKMR:360-363,KDLM:403-406	1	1	0	SignalP3NN:19,SignalP3HMM:19,SignalP4:19,SignalP5:19,DeepSig:19,Phobius:19,SignalP6:19	1	1
XPS81761.1	0.259	-1.902	2.227	.	.	.	.	0	0	0	PF04991	Domain:LicD	0	.	0	0	0.158	.	.	0.802	0.931	0.249	0.08	1	1	0	0	42764	377	4.5	6.845	2	113	186	97	59	194	108	62	46	0.768	LAPR:[LIJVAP]X[KRTPEI]R&LXXR:19-22,LLLR:LXXR:80-83,AMRR:[LIJVAP]X[KRTPEI]R:88-91,RR:[KR]R:90-91,AYTR:[LIJVAP]X[KRTPEI]R:157-160,ARRR:[LIJVAP]X[KRTPEI]R:161-164,RR:[KR]R:162-163,RR:[KR]R:164-165,RR:[KR]R:334-335	HALA:13-16,RDLS:37-40,KYFH:49-52,RAFH:74-77,RLLL:79-82,RSYM:83-86,HAMR:87-90,RTWI:95-98,HELG:129-132,HPFS:140-143,KKYL:203-206,RWID:228-231,HHIS:256-259,HLYT:284-287,RALT:321-324,RDIK:335-338	1	1	1	SignalP3NN:16,SignalP3HMM:16,SignalP4:16,SignalP5:16,Phobius:16,SignalP6:16	1	1
XPS77882.1	0.259	-6.513	-1.304	.	.	.	.	0	0	0	PF02518,PF00072,PF00512	Domain:HATPase_c,Domain:Response_reg,Domain:HisKA	0	.	0	0	0.047	.	.	0.941	0.045	0.434	0.04	0	0	0	0	141687	1303	9	6.974	15	456	738	384	103	635	308	167	141	0.819	KR:[KR]R:15-16,ATPR:[LIJVAP]X[KRTPEI]R:91-94,LRDR:LXXR:226-229,APER:[LIJVAP]X[KRTPEI]R:391-394,VSTR:[LIJVAP]X[KRTPEI]R:667-670,RR:[KR]R:670-671,LKTR:[LIJVAP]X[KRTPEI]R&LXXR:685-688,RR:[KR]R:688-689,RR:[KR]R:745-746,KR:[KR]R:771-772,LPQR:LXXR:889-892,LKGR:LXXR:902-905,ILRR:[LIJVAP]X[KRTPEI]R:909-912,RR:[KR]R:911-912,ASIR:[LIJVAP]X[KRTPEI]R:973-976,LPIR:[LIJVAP]X[KRTPEI]R&LXXR:1136-1139,INRR:[LIJVA…	KPIS:9-12,RDLP:28-31,RALI:74-77,HVLA:86-89,RSWG:122-125,KDLL:151-154,RTYV:162-165,RFYA:172-175,RPLG:198-201,RYLE:208-211,RFMR:229-232,RGLI:238-241,RALQ:342-345,RSMF:354-357,RLLR:468-471,KIFN:477-480,KAIS:527-530,RWFA:551-554,RLLS:565-568,HSIM:581-584,RELS:585-588,HELR:608-611,HGIL:615-618,HVMD:653-656,RRLK:670-673,KPLK:683-686,RRLR:688-691,KAFQ:828-831,RQII:851-854,HALA:934-937,KCLD:1034-1037,RTL…	0	0	0	.	0	0
XPS73556.1	0.259	-5.82	-1.303	.	.	.	.	0	0	0	PF00611,PF00018	Family:FCH,Domain:SH3_1	0	.	0	0	0.07	.	.	0.765	0.73	0.455	0.03	0	0	0	0	107905	992	25	9.572	9	341	577	223	74	480	230	131	99	0.636	RR:[KR]R:122-123,PPPR:[LIJVAP]X[KRTPEI]R:363-366,PDPR:[LIJVAP]X[KRTPEI]R:386-389,KR:[KR]R:487-488,RR:[KR]R:497-498,VDPR:[LIJVAP]X[KRTPEI]R:557-560,AAKR:[LIJVAP]X[KRTPEI]R:652-655,KR:[KR]R:654-655,PPTR:[LIJVAP]X[KRTPEI]R:705-708	KAFY:46-49,KKLL:61-64,KPLG:69-72,RKIV:123-126,KLLK:132-135,KGFL:159-162,KVLE:199-202,RDWK:210-213,KDIT:266-269,KFIN:286-289,RTMN:314-317,RELG:342-345,KPMP:466-469,RGFF:488-491,RPLA:534-537,HGLA:620-623,RQMQ:680-683,KSLA:918-921,KNYN:924-927,RIIL:931-934,RAMY:938-941	1	0	0	.	0	0
XPS72140.1	0.257	-6.352	-1.303	.	.	.	.	0	0	0	PF08737	Family:Rgp1	0	.	0	0	0.032	.	.	0.907	0.789	0.58	0.14	0	0	0	0	89674.8	838	31	10.349	2	303	491	212	74	435	184	114	70	0.631	RR:[KR]R:44-45,PPRR:[LIJVAP]X[KRTPEI]R:210-213,RR:[KR]R:212-213,RR:[KR]R:290-291,LHQR:LXXR:351-354,PPKR:[LIJVAP]X[KRTPEI]R:361-364,KR:[KR]R:363-364,KR:[KR]R:398-399,KR:[KR]R:418-419,LLDR:LXXR:600-603,LPGR:LXXR:619-622,RR:[KR]R:664-665,ITPR:[LIJVAP]X[KRTPEI]R:771-774	RVFV:7-10,RKLP:57-60,RSIS:125-128,RRMP:290-293,RIIS:306-309,RFLP:345-348,RALH:349-352,RQLQ:364-367,REMR:449-452,RSYT:482-485,RGLP:492-495,RSMK:501-504,RVFG:532-535,HDLM:546-549,KVYG:819-822	1	1	1	.	0	0
XPS78508.1	0.256	-2.592	1.007	.	.	.	.	0	0	0	.	.	0	.	0	0.066	0.142	.	.	0.586	0.949	0.523	0.63	0	0	0	0	8217.49	74	4.5	9.265	2	27	44	23	9	40	14	10	4	0.938	PPPR:[LIJVAP]X[KRTPEI]R:57-60	RTFQ:4-7,RCMT:67-70	0	0	0	.	0	0
XPS67999.1	0.254	-0.836	-1.296	.	.	.	.	0	0	0	PF02800,PF00044	Domain:Gp_dh_C,Domain:Gp_dh_N	0	.	0	0.071	0.593	0.674	.	.	0.936	0.239	0.28	0	0	0	0	36580.6	337	2	7.053	2	107	194	106	33	182	85	45	40	1.371	LTVR:LXXR:244-247,RR:[KR]R:321-322	KTIR:71-74,KVIH:161-164,HSYT:178-181,KDWR:193-196,KVIP:218-221,KGIL:270-273,KNFV:304-307,RVLD:322-325	0	0	0	.	0	0
XPS69382.1	0.254	-0.47	3.279	.	.	.	.	0	0	0	.	.	0	.	0	0.002	0.17	.	.	0.675	0.935	0.337	0.48	1	1	0	0	4151.8	40	1	7.198	0	12	25	15	5	29	4	3	1	0.471	LPPR:[LIJVAP]X[KRTPEI]R&LXXR:35-38	HAIV:5-8	0	0	0	SignalP3NN:18,SignalP3HMM:18,SignalP4:18,SignalP5:18,DeepSig:18,Phobius:18,SignalP6:18	1	1
XPS67857.1	0.254	-1.615	3.272	.	.	.	.	0	0	0	PF00135	Domain:COesterase	0	CE1	0	0	0.047	.	.	0.85	0.518	0.318	0.63	1	1	0	0	61125.4	579	-5	5.202	7	229	358	180	65	348	74	36	38	0.624	AAKR:[LIJVAP]X[KRTPEI]R:331-334,KR:[KR]R:333-334	RQFF:5-8,KGIR:55-58,KKLP:126-129,HVLV:339-342,RQIW:484-487,RNLT:503-506,RMLD:517-520	0	0	0	SignalP3NN:23,SignalP3HMM:23,SignalP4:23,SignalP5:23,DeepSig:23,Phobius:23,SignalP6:23	1	1
XPS71730.1	0.254	-5.899	-2.168	.	.	.	.	0	0	0	PF05817	Family:Ribophorin_II	0	.	0	0.079	0.295	.	.	0.915	0.513	0.316	0.4	0	1	0	1	30113.8	288	10.5	10.134	0	112	163	112	31	176	54	34	20	0.741	KR:[KR]R:79-80,VQER:[LIJVAP]X[KRTPEI]R:279-282,RR:[KR]R:282-283	KPLA:52-55,KTIS:56-59,KDLP:116-119,HQFL:120-123,KPIP:127-130,KPYK:142-145,KIFD:147-150,HHIF:177-180,KAIT:189-192,KALG:222-225,HALF:231-234,RALS:274-277,RRLA:282-285	0	0	0	SignalP3NN:21,SignalP3HMM:21,SignalP4:21,SignalP5:21,DeepSig:21,Phobius:21,SignalP6:21	1	1
XPS69063.1	0.254	4.376	2.762	.	.	.	.	0	0	0	.	.	0	.	0	1	0.627	.	0.777	.	0.955	0.224	0.68	1	1	0	0	4231.05	39	5	8.816	6	19	25	8	4	28	5	5	0	0.308	LSAR:LXXR:11-14,RR:[KR]R:20-21	RPLC:23-26	0	0	0	SignalP3NN:19,SignalP3HMM:19,DeepSig:19,Phobius:19	1	1
XPS68726.1	0.253	0.49	1.453	.	.	.	.	0	0	0	.	.	0	.	0	0.974	0.479	.	.	0.571	0.976	0.564	0.04	1	1	0	0	19105.7	171	-0.5	6.333	3	51	87	56	19	95	46	24	22	0.514	AFKR:[LIJVAP]X[KRTPEI]R:51-54,KR:[KR]R:53-54,ARIR:[LIJVAP]X[KRTPEI]R:111-114,LAGR:LXXR:160-163	HHLD:44-47,RWFL:157-160,RSIK:163-166	0	0	0	SignalP3NN:18,SignalP3HMM:18,SignalP4:18,DeepSig:18,SignalP6:18,SignalP5:20,Phobius:22	1	1
XPS67707.1	0.252	-2.398	2.899	.	.	.	.	0	0	0	PF00144	Domain:Beta-lactamase	0	.	0	0	0.009	.	.	0.897	0.007	0.438	0.13	1	1	0	0	63274.4	571	-13	4.936	4	171	296	176	65	308	129	61	68	1.129	ARER:[LIJVAP]X[KRTPEI]R:80-83,VIER:[LIJVAP]X[KRTPEI]R:242-245,RR:[KR]R:358-359,LLYR:LXXR:482-485,VEER:[LIJVAP]X[KRTPEI]R:500-503	KCYE:17-20,HPLP:25-28,HAFA:39-42,KTFT:106-109,KYIV:130-133,KDIT:146-149,RSLA:151-154,REWA:162-165,KKIC:204-207,KYLR:309-312,HALN:323-326,RGIN:335-338,RALQ:352-355,RFIT:362-365,RGFV:402-405,RGLV:446-449,KNWI:467-470,HGFA:473-476,KALD:562-565	0	0	0	SignalP3NN:16,SignalP3HMM:16,SignalP4:16,SignalP5:16,Phobius:16,SignalP6:16	1	1
XPS76688.1	0.25	1.056	3.31	MoCDIP4	.	.	.	0	0	0	PF03443	Family:AA9	1	AA9	0	0	0.026	.	.	0.517	0.043	0.406	0.47	1	1	0	0	52075.7	493	-11.5	4.854	14	201	317	129	44	257	111	52	59	0.74	RR:[KR]R:479-480,VRRR:[LIJVAP]X[KRTPEI]R:486-489,RR:[KR]R:487-488	KIFE:128-131,HGYD:132-135,KCFD:299-302,KVLA:339-342,KSID:346-349,KGYV:451-454,RRFG:488-491	0	0	0	SignalP3NN:19,SignalP3HMM:19,SignalP4:19,SignalP5:19,DeepSig:19,Phobius:19,SignalP6:19	1	1
XPS77366.1	0.249	-0.313	2.426	.	.	.	.	0	0	0	.	.	0	.	0	0	0.018	.	0.506	.	0.093	0.366	0.84	1	1	0	0	29954.3	290	-8	4.249	4	133	191	89	24	161	31	12	19	0.632	.	RFFR:125-128,HTYG:150-153	0	0	0	SignalP3NN:16,SignalP3HMM:16,SignalP4:16,SignalP5:16,DeepSig:16,Phobius:16,SignalP6:16	1	1
XPS69568.1	0.247	-0.394	2.656	CfTom1	.	.	.	0	0	0	PF00150	Domain:Cellulase	0	GH5_9,GH5,GH5_14,GH5_45,GH5_50,GH5_15,GH5_44,GH5_54,GH5_49,GH5_47,GH5_22,GH5_46,GH5_33,GH5_36,GH5_52,GH5_23,GH5_25,GH5_39,GH5_38,GH5_4	0	0	0.057	.	.	0.968	0.922	0.371	0.49	1	1	0	0	47379.2	425	-7.5	5.356	6	131	230	110	69	247	95	47	48	0.84	KR:[KR]R:28-29,RR:[KR]R:367-368,LWDR:LXXR:413-416	RGIL:4-7,RALQ:87-90,RAIT:139-142,KILN:191-194,RQFY:226-229,HQYQ:275-278,RHLN:324-327,RRYI:367-370,RKFD:416-419	0	0	0	SignalP3NN:20,SignalP3HMM:20,SignalP4:20,SignalP5:20,DeepSig:20,Phobius:20,SignalP6:20	1	1
XPS75790.1	0.247	-1.867	3.056	.	.	.	.	0	0	0	PF00884	Family:Sulfatase	0	.	0	0	0.031	.	.	0.794	0.035	0.424	0.24	1	1	0	0	63484	566	-5.5	5.94	8	164	311	143	81	302	129	66	63	1.122	PAKR:[LIJVAP]X[KRTPEI]R:230-233,KR:[KR]R:232-233,KR:[KR]R:280-281,LIDR:LXXR:295-298,LSAR:LXXR:479-482,KR:[KR]R:491-492,LEPR:[LIJVAP]X[KRTPEI]R&LXXR:550-553	KHFA:52-55,KHFC:63-66,RFIE:101-104,KMMN:128-131,HSLT:133-136,KNYP:173-176,RPFF:201-204,HLFP:236-239,KTLR:261-264,KRLQ:280-283,HRLP:324-327,RELY:449-452,HQLT:459-462,RPWE:500-503,KNLR:512-515,RGWR:553-556	0	0	0	SignalP3NN:16,SignalP4:16,SignalP3HMM:22,Phobius:22	1	1
XPS74703.1	0.247	-2.194	3.055	.	.	.	.	0	0	0	PF00394,PF07732,PF07731	Domain:Cu-oxidase,Domain:Cu-oxidase_3,Domain:Cu-oxidase_2	0	AA1,AA1_2,AA1_1,AA1_3	0	0	0.01	.	.	0.957	0.97	0.366	0.59	1	1	0	0	66268.5	596	-2.5	6.334	8	181	325	159	93	343	128	69	59	0.921	LSQR:LXXR:99-102,KR:[KR]R:268-269,ITRR:[LIJVAP]X[KRTPEI]R:366-369,RR:[KR]R:368-369,PVTR:[LIJVAP]X[KRTPEI]R:428-431,ANER:[LIJVAP]X[KRTPEI]R:484-487,RR:[KR]R:487-488	HRMS:56-59,HGLS:97-100,KTYR:232-235,HVIG:258-261,KHMQ:273-276,KVYT:312-315,KEIT:364-367,RAWP:431-434,HPFH:461-464,RRLK:487-490,RCWR:518-521,HILQ:535-538,HMIM:539-542,HNWD:586-589	1	1	0	SignalP3NN:18,SignalP3HMM:18,SignalP4:18,SignalP5:18,DeepSig:18,Phobius:18,SignalP6:18	1	1
XPS75939.1	0.243	-0.765	-1.303	.	.	.	.	0	0	0	.	.	0	.	0	0.996	0.409	0.84	.	.	0.884	0.436	0.14	0	0	0	0	14735.7	141	5.5	9.972	1	54	83	39	3	70	50	28	22	0.638	ATPR:[LIJVAP]X[KRTPEI]R:99-102,KR:[KR]R:103-104,AAPR:[LIJVAP]X[KRTPEI]R:120-123	HAIG:34-37,RKIV:59-62,KKLK:63-66	1	0	0	.	0	0
XPS69980.1	0.241	-2.81	2.409	.	.	.	.	0	0	0	.	.	0	.	0	0	0.005	.	.	0.885	0.34	0.287	0.46	1	1	0	0	18125.3	177	-2	4.651	1	89	115	64	21	109	18	8	10	0.6	.	RSFT:61-64,RAFK:121-124,RQII:136-139,KKFG:163-166	0	1	0	SignalP3NN:21,SignalP3HMM:21,SignalP4:21,SignalP5:21,DeepSig:21,Phobius:21,SignalP6:21	1	1
XPS73957.1	0.24	-1.036	3.167	.	.	.	.	0	0	0	.	.	0	.	0	0	0.042	.	.	0.594	0.862	0.347	0.87	1	1	0	0	31557.8	317	2	8.086	4	166	226	98	18	166	34	18	16	0.648	.	KAYN:80-83,RNIT:95-98,KYWL:232-235,KVMV:288-291,KGFS:299-302	0	0	0	SignalP3NN:14,SignalP5:14,Phobius:14,SignalP3HMM:23,DeepSig:23	1	1
XPS76079.1	0.24	3.374	3.166	Mg3LysM,CfEcp6,MoSlp1,RsLysM,RiSLM	.	.	.	0	0	0	PF01822	Domain:WSC	0	.	0	0.003	0.21	.	0.507	.	0.007	0.404	0.57	1	1	0	0	31790.4	289	-6	4.861	12	117	174	63	31	146	64	30	34	0.883	LTQR:LXXR:17-20,KR:[KR]R:57-58,ATPR:[LIJVAP]X[KRTPEI]R:126-129,LDFR:LXXR:165-168,RR:[KR]R:278-279	RYWG:50-53,KRFH:57-60,KDMG:144-147,RTWI:161-164,RWLP:168-171,HKIQ:186-189,KVMC:227-230,RNMA:279-282	0	0	0	SignalP3NN:18,SignalP3HMM:18,SignalP4:18,SignalP5:18,Phobius:18	1	1
XPS69762.1	0.239	-1.704	3.252	.	.	.	.	0	0	0	PF00135	Domain:COesterase	0	.	0	0	0.012	.	.	0.767	0.007	0.525	0.72	1	1	0	0	60427.8	567	4.5	7.932	6	214	346	170	72	344	69	38	31	0.81	PPER:[LIJVAP]X[KRTPEI]R:62-65,KR:[KR]R:77-78,LDQR:LXXR:196-199,KR:[KR]R:299-300,AARR:[LIJVAP]X[KRTPEI]R:323-326,RR:[KR]R:325-326,LVFR:LXXR:446-449,LDYR:LXXR:544-547	KRLN:77-80,RNIH:207-210,RVIE:300-303,RRLS:325-328,RVFA:346-349,RYYF:420-423,RTYN:449-452	0	1	0	SignalP3NN:19,SignalP3HMM:19,SignalP4:19,SignalP5:19,DeepSig:19,Phobius:19,SignalP6:19	1	1
XPS68090.1	0.239	-2.543	2.765	.	.	.	.	0	0	0	PF00026	Family:Asp	0	.	0	0	0.009	.	.	0.929	0.349	0.407	0.5	1	1	0	0	44326.2	405	-24	4.135	4	147	232	107	52	220	80	29	51	0.965	LPVR:LXXR:24-27,RR:[KR]R:371-372	KSYR:44-47,RTLY:77-80,HSFA:92-95,RWIT:136-139,KLLN:301-304,RRWY:371-374,KEWD:398-401	0	1	0	SignalP3NN:19,SignalP4:19,SignalP5:19,DeepSig:19,Phobius:19,SignalP6:19	1	0
XPS81595.1	0.239	-1.192	3.25	.	.	.	.	0	0	0	.	.	0	.	0	0	0.036	.	.	0.672	0.792	0.509	0.71	1	1	0	0	50769.6	485	3	7.973	5	180	307	170	41	293	60	32	28	0.789	LDER:[LIJVAP]X[KRTPEI]R&LXXR:46-49,PSTR:[LIJVAP]X[KRTPEI]R:285-288,RR:[KR]R:341-342	RSFT:2-5,RQLL:49-52,KKLQ:165-168,RKLL:218-221,KSYA:224-227,KKIA:263-266,KYWP:282-285,RKIV:288-291,KMLT:472-475,KSYA:480-483	0	1	0	SignalP3NN:18,SignalP3HMM:18,SignalP4:18,SignalP5:18,DeepSig:18,Phobius:18,SignalP6:18	1	1
XPS68263.1	0.239	-1.133	3.216	.	.	.	.	0	0	0	PF00135	Domain:COesterase	0	.	0	0	0.032	.	.	0.614	0.634	0.404	0.72	1	1	0	0	59822.8	556	-9.5	4.711	4	196	329	168	71	333	79	36	43	0.875	ADPR:[LIJVAP]X[KRTPEI]R:127-130,LNYR:LXXR:196-199,ALRR:[LIJVAP]X[KRTPEI]R:389-392,RR:[KR]R:391-392	KLFS:3-6,KGYG:152-155,HLFG:237-240,HQIT:260-263,RKFL:298-301,RALP:313-316,RQLN:392-395,KAYN:449-452,HGFD:467-470	0	0	0	SignalP3NN:16,SignalP4:16,SignalP3HMM:21,SignalP5:21,DeepSig:21,Phobius:21,SignalP6:21	1	1
XPS73245.1	0.239	-1.889	3.289	.	.	.	.	0	0	0	PF01915,PF00933,PF14310	Domain:Glyco_hydro_3_C,Domain:Glyco_hydro_3,Family:Fn3-like	0	GH3	0	0	0.009	.	.	0.895	0.576	0.407	0.65	1	1	0	0	85259	787	-27.5	4.387	11	273	462	227	92	455	132	55	77	0.796	PYKR:[LIJVAP]X[KRTPEI]R:188-191,KR:[KR]R:190-191,LARR:[LIJVAP]X[KRTPEI]R&LXXR:378-381,RR:[KR]R:380-381	RCLA:6-9,RSLV:45-48,HGIA:83-86,KVIS:124-127,RAFN:131-134,KALI:175-178,HGLQ:179-182,KHYA:197-200,HEWS:293-296,RQYS:343-346,RQLG:363-366,RTYK:596-599,KSLV:687-690,RLFN:694-697,KVLY:724-727,KVLE:752-755	0	0	0	SignalP3NN:18,SignalP4:18,SignalP5:18,DeepSig:18,Phobius:18,SignalP6:18	1	0
XPS79648.1	0.238	0.205	1.164	.	.	.	.	0	0	0	.	.	0	.	0	0.388	0.653	.	.	0.665	0.752	0.708	0.41	1	1	0	0	26312.5	241	8.5	9.73	1	73	128	71	26	140	52	32	20	0.915	LSRR:[LIJVAP]X[KRTPEI]R&LXXR:32-35,RR:[KR]R:34-35,LNFR:LXXR:144-147,VGIR:[LIJVAP]X[KRTPEI]R:233-236,RR:[KR]R:236-237	HLIL:2-5,KVII:47-50,KTYD:55-58,KSLL:59-62,HDYP:92-95,HAFN:100-103,RAYS:154-157,KSMM:194-197,KPMG:201-204,RRMS:236-239	1	0	0	SignalP3NN:22,SignalP3HMM:22,DeepSig:22,Phobius:22	1	1
XPS71929.1	0.237	-1.974	3.271	.	.	.	.	0	0	0	PF01301,PF10435,PF13364,PF13363	Domain:Glyco_hydro_35,Domain:BetaGal_dom2,Domain:BetaGal_dom4_5,Domain:BetaGal_dom3	0	GH35	0	0	0.009	.	.	0.899	0.289	0.633	0.64	1	1	0	0	109986	1007	-12.5	5.367	5	333	583	285	139	562	201	99	102	1.063	KR:[KR]R:56-57,IAER:[LIJVAP]X[KRTPEI]R:122-125,VITR:[LIJVAP]X[KRTPEI]R:130-133,KR:[KR]R:179-180,LFYR:LXXR:339-342	RSIN:2-5,KRLF:56-59,HYWR:66-69,HDFT:114-117,KLYE:118-121,RYLA:165-168,RYMD:219-222,KSWS:247-250,KDYA:251-254,HFLE:298-301,RNLI:342-345,RKID:385-388,KYYE:390-393,KNLA:395-398,HDYS:444-447,KILV:482-485,KVIV:574-577,KSFK:639-642,KAFS:666-669,HLFR:732-735,HDLR:806-809,RGIL:816-819	0	0	0	SignalP3NN:25,SignalP4:25,SignalP5:25,DeepSig:25,Phobius:25,SignalP6:25	1	0
XPS71593.1	0.237	0.494	3.297	FoSep1	.	.	.	0	0	0	PF00082,PF05922	Domain:Peptidase_S8,Domain:Inhibitor_I9	0	.	0	0	0.019	.	.	0.797	0.97	0.38	0.55	1	1	0	0	43924.8	418	-8.5	4.978	2	168	264	133	36	223	90	43	47	0.709	ISPR:[LIJVAP]X[KRTPEI]R:19-22,RR:[KR]R:54-55,LARR:[LIJVAP]X[KRTPEI]R&LXXR:56-59,RR:[KR]R:58-59,AIER:[LIJVAP]X[KRTPEI]R:65-68,KR:[KR]R:120-121,VAKR:[LIJVAP]X[KRTPEI]R:214-217,KR:[KR]R:216-217,LSSR:LXXR:262-265,VEKR:[LIJVAP]X[KRTPEI]R:388-391,KR:[KR]R:390-391	KYIP:27-30,KYLV:32-35,RRLA:54-57,RTFS:68-71,RDLV:121-124,KTYG:210-213,KVFD:224-227,RDIV:342-345,RVLE:391-394	0	0	0	SignalP3NN:16,SignalP3HMM:16,SignalP4:16,SignalP5:16,DeepSig:16,Phobius:16,SignalP6:16	1	1
XPS67706.1	0.237	-1.939	3.161	.	.	.	.	0	0	0	PF18565,PF16355,PF02836,PF02837,PF00703	Domain:Glyco_hydro2_C5,Family:DUF4982,Domain:Glyco_hydro_2_C,Domain:Glyco_hydro_2_N,Domain:Glyco_hydro_2	0	GH2,GH158,GH5_42,CBM67	0	0	0.03	.	.	0.934	0.925	0.5	0.44	1	1	0	0	95930.7	877	-21	4.867	1	285	508	240	106	478	194	91	103	0.925	VRER:[LIJVAP]X[KRTPEI]R:37-40,RR:[KR]R:142-143,LNGR:LXXR:173-176,LALR:LXXR:203-206,AAER:[LIJVAP]X[KRTPEI]R:395-398,RR:[KR]R:467-468,KR:[KR]R:724-725	KPWI:65-68,HDWA:112-115,RSLH:143-146,KSMF:156-159,RWYP:215-218,KLWG:320-323,RSIT:356-359,HDLG:382-385,RQIE:398-401,HLIF:451-454,RSFI:463-466,KTLQ:497-500,KMIW:559-562,RGIY:573-576,KVFE:619-622,RFYL:669-672,HILP:685-688,HVFT:703-706,KAWK:747-750,KDLS:783-786,KAFS:838-841	1	0	0	SignalP3NN:25,SignalP4:25,SignalP5:25,DeepSig:25,Phobius:25,SignalP6:25	1	0
XPS76559.1	0.237	-2.255	3.124	.	.	.	.	0	0	0	PF08244,PF00251	Domain:Glyco_hydro_32C,Domain:Glyco_hydro_32N	0	GH32	0	0	0.009	.	.	0.962	0.407	0.333	0.47	1	1	0	0	67957.4	621	-17.5	4.775	1	215	357	172	83	337	130	60	70	0.838	ALRR:[LIJVAP]X[KRTPEI]R:19-22,RR:[KR]R:21-22,PFIR:[LIJVAP]X[KRTPEI]R:104-107,VIER:[LIJVAP]X[KRTPEI]R:122-125,LLPR:[LIJVAP]X[KRTPEI]R&LXXR:394-397,LHQR:LXXR:434-437,RR:[KR]R:460-461	HALR:18-21,HVLP:52-55,RGIN:125-128,RNFT:166-169,REML:310-313,RFLT:365-368,RELS:397-400,KHYV:474-477,RIYY:506-509,RLFD:543-546,RDIG:591-594	0	0	0	SignalP3NN:17,SignalP6:17,SignalP4:19,SignalP5:19,DeepSig:19,Phobius:22	1	0
XPS81244.1	0.237	-2.254	3.058	.	.	.	.	0	0	0	.	.	0	.	0	0	0.009	.	.	0.978	0.938	0.426	0.49	1	1	0	0	79275.6	726	-30.5	4.327	7	238	414	223	83	404	133	54	79	1.037	VGPR:[LIJVAP]X[KRTPEI]R:64-67,VLER:[LIJVAP]X[KRTPEI]R:304-307,AVKR:[LIJVAP]X[KRTPEI]R:716-719,KR:[KR]R:718-719	RMFP:3-6,HIYF:39-42,HVIV:49-52,RLLV:67-70,RTIR:144-147,RTWF:178-181,KLLA:262-265,RFLT:269-272,KMID:344-347,KNYF:357-360,KILN:399-402,RAIA:456-459,RHFF:559-562,HILK:581-584,RQLG:637-640,KILS:659-662,RLWD:666-669,RQLW:707-710	0	0	0	SignalP3NN:18,SignalP3HMM:18,SignalP4:18,SignalP5:18,DeepSig:18,Phobius:18,SignalP6:18	1	1
XPS78453.1	0.235	-1.521	0.943	.	.	.	.	0	0	0	.	.	0	.	0	0	0.04	.	0.615	.	0.645	0.467	0.84	1	1	0	0	20690.1	205	-5	4.375	1	103	157	66	14	110	20	8	12	0.566	.	HTFV:97-100,RVIY:111-114	0	0	0	SignalP3NN:20,SignalP3HMM:20,SignalP4:20,SignalP5:20,DeepSig:20,Phobius:20,SignalP6:20	1	1
XPS68199.1	0.234	0.55	3.189	.	.	.	.	0	0	0	PF01083	Domain:Cutinase	1	CE5	0	0	0.05	.	.	0.777	0.767	0.681	0.64	1	1	0	0	36787.3	364	1	6.794	11	174	258	133	30	223	53	28	25	0.525	.	HDFR:47-50,KQIG:84-87,HLIL:108-111,RSYC:194-197,KHLS:212-215	0	0	0	SignalP3NN:20,SignalP3HMM:20,SignalP4:20,SignalP5:20,DeepSig:20,Phobius:20,SignalP6:20	1	1
XPS79641.1	0.233	-1.249	3.29	.	.	.	.	0	0	0	.	.	0	.	0	0	0.073	.	.	0.724	0.03	0.263	0.59	1	1	0	0	29918.1	291	-27	3.68	14	127	208	73	15	167	51	12	39	0.43	PARR:[LIJVAP]X[KRTPEI]R:19-22,RR:[KR]R:21-22	KCYD:28-31,KALV:191-194,KIMA:257-260	0	0	0	SignalP3NN:17,SignalP3HMM:17,SignalP4:17,SignalP5:17,DeepSig:17,SignalP6:17,Phobius:22	1	1
XPS69372.1	0.232	-1.164	3.222	.	.	.	.	0	0	0	.	.	0	.	0	0.246	0.032	.	.	0.753	0.951	0.336	0.34	1	1	0	0	4393.3	41	1	7.198	0	10	22	19	6	33	4	3	1	0.562	LPPR:[LIJVAP]X[KRTPEI]R&LXXR:36-39	HAIV:5-8	0	0	0	SignalP3NN:18,SignalP3HMM:18,SignalP4:18,SignalP5:18,DeepSig:18,Phobius:18,SignalP6:18	1	1
XPS76282.1	0.23	1.733	1.271	VdSCP41	.	.	.	0	0	0	.	.	0	.	0	0.028	0.186	.	0.812	.	0.992	0.595	0.87	1	1	0	0	19055.8	185	-17	3.523	8	77	136	65	6	95	29	6	23	0.667	VLTR:[LIJVAP]X[KRTPEI]R:101-104	RQFD:76-79	0	0	0	SignalP3NN:18,SignalP3HMM:18,SignalP4:18,SignalP5:18,DeepSig:18,Phobius:18,SignalP6:18	1	1
XPS74354.1	0.228	0.815	3.305	PpCBEL	.	.	.	0	0	0	PF01822	Domain:WSC	0	.	0	0	0.092	.	.	0.772	0.401	0.442	0.79	1	1	0	0	91383.2	872	-14	4.534	47	406	606	210	99	516	96	42	54	0.827	LPKR:[LIJVAP]X[KRTPEI]R&LXXR:28-31,KR:[KR]R:30-31,IAER:[LIJVAP]X[KRTPEI]R:161-164,VAIR:[LIJVAP]X[KRTPEI]R:354-357	RDLT:31-34,RTLH:56-59,KGYA:80-83,RILD:98-101,KGMS:136-139,KSLG:152-155,RTLQ:164-167,RGFC:334-337,RGLV:344-347,KGLG:415-418,RTMN:479-482,KAYS:495-498,KGLG:523-526,KIYN:540-543,RTMN:587-590,KAYS:603-606,KLYN:683-686,RTMG:730-733,RTMN:842-845	0	0	0	SignalP3NN:23,SignalP4:23,SignalP5:23,DeepSig:23,Phobius:23,SignalP6:23	1	0
XPS72323.1	0.227	1.324	1.676	BghBEC4,MoCDIP11,MoCDIP2	.	.	.	0	0	0	PF20238	Domain:DUF6595	0	.	0	0.005	0.069	.	0.732	.	0.162	0.465	0.84	1	1	0	0	22321.6	223	-4.5	4.54	4	103	154	70	16	127	25	11	14	0.621	.	RGFD:27-30	0	0	0	SignalP3NN:17,SignalP3HMM:17,SignalP4:17,SignalP5:17,DeepSig:17,Phobius:17,SignalP6:17	1	1
XPS74234.1	0.227	-2.429	1.83	.	.	.	.	0	0	0	.	.	0	.	0	0	0.037	.	.	0.594	0.707	0.37	0.88	1	1	0	0	27882.4	276	1	7.459	6	133	199	85	21	161	27	14	13	0.642	LEAR:LXXR:25-28,KR:[KR]R:73-74,LTAR:LXXR:76-79	KYFT:4-7,RGLT:74-77,KTIS:222-225,KSFG:261-264	0	1	1	SignalP3NN:16,SignalP3HMM:16,SignalP4:16,SignalP5:16,DeepSig:16,Phobius:16,SignalP6:28	1	1
XPS77315.1	0.227	4.327	3.291	PsOPEL,MoHrip2,UvHrip1	.	.	.	0	0	0	.	.	0	.	0	0.032	0.263	0.523	0.712	.	0.86	0.433	0.47	1	1	0	0	32599.9	305	-6	5	11	123	197	78	28	149	65	31	34	0.886	KR:[KR]R:290-291,RR:[KR]R:298-299	KPMA:33-36	0	0	0	SignalP3NN:19,SignalP3HMM:19,SignalP4:19,SignalP5:19,DeepSig:19,Phobius:19,SignalP6:19	1	1
XPS69665.1	0.222	-2.374	3.056	.	.	.	.	0	0	0	PF00732,PF05199	Domain:GMC_oxred_N,Domain:GMC_oxred_C	0	AA3_2,AA3,AA3_3,AA3_1	0	0	0.009	.	.	0.954	0.045	0.359	0.32	1	1	0	0	66643.4	618	-11	4.93	3	224	356	173	69	345	106	50	56	0.833	KR:[KR]R:121-122,RR:[KR]R:313-314,AYRR:[LIJVAP]X[KRTPEI]R:503-506,RR:[KR]R:505-506	KRIH:121-124,KNLG:129-132,KYYE:169-172,RSMQ:173-176,KQIP:233-236,RNII:286-289,RPFT:306-309,KDLP:349-352,HEIS:369-372,RVLA:446-449,KQYA:455-458,RVFG:571-574,RVID:579-582	0	0	0	SignalP3NN:18,SignalP3HMM:18,SignalP4:18,DeepSig:18,Phobius:18,SignalP6:18,SignalP5:22	1	1
XPS70229.1	0.222	-1.888	3.176	.	.	.	.	0	0	0	PF00135	Domain:COesterase	0	.	0	0	0.05	.	.	0.889	0.043	0.5	0.57	1	1	0	0	62380.7	575	-2	6.27	5	207	326	159	80	327	105	55	50	0.905	IPTR:[LIJVAP]X[KRTPEI]R:25-28,LRFR:LXXR:69-72,RR:[KR]R:72-73,AGRR:[LIJVAP]X[KRTPEI]R:432-435,RR:[KR]R:434-435	HLLA:238-241,KTLQ:278-281,RCLK:293-296,RQLA:327-330,KSIR:353-356,RALS:371-374,KQWS:385-388,RRYA:434-437,KAWK:498-501,KVMS:506-509,RMWI:510-513,KFID:565-568	0	0	0	SignalP3NN:22,SignalP3HMM:22,SignalP4:22,SignalP5:22,DeepSig:22,Phobius:22,SignalP6:22	1	1
XPS81638.1	0.222	-2.152	3.165	.	.	.	.	0	0	0	PF00326	Domain:Peptidase_S9	0	CE1	0	0	0.009	.	.	0.934	0.363	0.384	0.47	1	1	0	0	79337.6	718	-28.5	4.506	2	233	407	192	108	386	152	66	86	1.121	AAPR:[LIJVAP]X[KRTPEI]R:27-30,RR:[KR]R:30-31,LDYR:LXXR:648-651,VTKR:[LIJVAP]X[KRTPEI]R:683-686,KR:[KR]R:685-686	RALF:42-45,RHWN:180-183,KNLL:212-215,KGIN:216-219,KKLA:306-309,KLYV:324-327,RLWL:371-374,RIFY:417-420,KQYP:421-424,KKII:428-431,RLWA:503-506,RAIA:561-564,HALG:580-583,REFK:584-587,RVLI:651-654,RFLH:672-675,KSIF:694-697,RYYA:701-704	0	0	0	SignalP3NN:19,SignalP3HMM:19,SignalP4:19,SignalP5:19,DeepSig:19,Phobius:19,SignalP6:19	1	1
XPS80817.1	0.22	-2.533	2.546	.	.	.	.	0	0	0	PF18368,PF00703,PF17786,PF02837	Domain:Ig_GlcNase,Domain:Glyco_hydro_2,Domain:Mannosidase_ig,Domain:Glyco_hydro_2_N	0	GH2,GH158	0	0	0.03	.	.	0.853	0.017	0.404	0.65	1	1	0	0	99936.1	895	-26	4.626	4	288	503	227	113	454	198	89	109	1.202	ASTR:[LIJVAP]X[KRTPEI]R:41-44,KR:[KR]R:236-237,LFKR:[LIJVAP]X[KRTPEI]R&LXXR:587-590,KR:[KR]R:589-590,LVNR:LXXR:683-686,LILR:LXXR:745-748,APTR:[LIJVAP]X[KRTPEI]R:765-768,VDER:[LIJVAP]X[KRTPEI]R:827-830,LWPR:[LIJVAP]X[KRTPEI]R&LXXR:846-849	RLLW:11-14,KQYF:138-141,KVYP:169-172,RDFA:177-180,KNLG:231-234,KELG:252-255,KDYD:428-431,KFLS:549-552,KGLY:565-568,RTIY:580-583,KRYG:589-592,KSLA:595-598,RNLS:686-689,KQLT:726-729,RLIL:744-747	0	0	0	SignalP3NN:27,SignalP3HMM:27,SignalP4:27,SignalP5:27,DeepSig:27,Phobius:27,SignalP6:27	1	1
XPS68078.1	0.22	0.923	3.266	MoCDIP4,ChNIS1,CoNIS1,MoNIS1	.	.	.	0	0	0	PF03443	Family:AA9	1	AA9	0	0	0.085	.	.	0.743	0.944	0.61	0.7	1	1	0	0	33893.5	329	-7.5	4.847	4	148	216	104	33	187	60	28	32	0.626	RR:[KR]R:321-322	KLIK:148-151,HEII:173-176,KCFN:192-195,KLYT:213-216,RAFR:325-328	0	0	0	SignalP3NN:20,SignalP3HMM:20,SignalP5:20,Phobius:20,SignalP6:20	1	1
XPS77023.1	0.219	-1.792	3.18	.	.	.	.	0	0	0	PF00930,PF00326	Repeat:DPPIV_N,Domain:Peptidase_S9	0	.	0	0	0.01	.	.	0.833	0.805	0.581	0.44	1	1	0	0	87551.4	783	-26.5	4.669	0	235	424	217	119	423	186	84	102	1.318	ASTR:[LIJVAP]X[KRTPEI]R:50-53,LELR:LXXR:250-253,VRER:[LIJVAP]X[KRTPEI]R:331-334,IATR:[LIJVAP]X[KRTPEI]R:345-348,KR:[KR]R:408-409	RSFA:2-5,RAFS:53-56,HVLW:109-112,KEYR:118-121,HSYY:122-125,RELE:248-251,KVIY:303-306,RAFN:307-310,RYLG:348-351,HIYL:378-381,RGLV:409-412,HVYS:425-428,KALV:437-440,RTIV:483-486,KALY:489-492,KKYP:530-533,KQFS:549-552,KAYI:557-560,REFR:583-586,KNLG:591-594,KELA:606-609,RFYD:655-658,RYMK:664-667,KKIA:688-691,HSIV:737-740,KFLY:746-749,RQLT:750-753,KKIY:754-757,HQWS:770-773,KSLP:775-778,KKWI:779-782	0	0	0	SignalP3NN:16,SignalP3HMM:16,SignalP4:16,SignalP5:16,DeepSig:16,Phobius:16,SignalP6:16	1	1
XPS70853.1	0.217	0.405	3.29	PsOPEL	.	.	.	0	0	0	PF10287,PF10290	Domain:YJL171C_Tos1_C,Domain:YJL171C_Tos1_N	0	.	0	0	0.036	.	.	0.857	0.887	0.268	0.39	1	1	0	0	57317.9	517	-4.5	5.983	12	182	299	125	72	270	111	57	54	1.009	RR:[KR]R:114-115,RR:[KR]R:124-125,VRKR:[LIJVAP]X[KRTPEI]R:263-266,KR:[KR]R:265-266,AIPR:[LIJVAP]X[KRTPEI]R:401-404,KR:[KR]R:459-460	KHLM:2-5,RAMK:126-129,HRFD:139-142,HKLT:151-154,KDLE:236-239,RHFT:240-243,KAFF:368-371,RILQ:404-407,RALK:464-467,RVLD:480-483,HSLF:510-513	1	1	0	SignalP3NN:17,Phobius:17,SignalP6:17,SignalP4:20,DeepSig:20,SignalP5:21	1	0
XPS81706.1	0.216	-1.267	3.143	.	.	.	.	0	0	0	PF05577	Domain:Peptidase_S28	0	.	0	0	0.119	.	.	0.763	0.011	0.476	0.69	1	1	0	0	63754.3	572	9.5	8.466	9	200	319	142	90	311	123	68	55	1.148	LAVR:LXXR:64-67,KR:[KR]R:191-192,LNKR:[LIJVAP]X[KRTPEI]R&LXXR:394-397,KR:[KR]R:396-397	RDFN:23-26,RFWV:96-99,KQIV:136-139,HRYY:151-154,KYLT:172-175,KQFK:188-191,KNIN:193-196,RGMN:254-257,KYID:273-276,HTFD:277-280,RSFC:330-333,KTFT:368-371,KRFT:396-399,RDIC:438-441,RQFP:443-446,RSLL:450-453,KVFG:464-467,RTLS:487-490,KDIF:517-520,HCYD:529-532,RTYF:534-537,RKYF:544-547,KCYK:556-559	0	0	0	SignalP3NN:16,SignalP3HMM:16,SignalP5:16,Phobius:16,SignalP6:18	1	1
XPS71807.1	0.215	-0.828	3.156	.	.	.	.	0	0	0	PF01400	Domain:Astacin	0	.	0	0	0.077	.	.	0.509	0.017	0.432	0.17	1	1	0	0	37940.9	349	-15.5	4.604	12	121	211	75	38	181	94	42	52	0.864	ATKR:[LIJVAP]X[KRTPEI]R:56-59,KR:[KR]R:58-59,AQRR:[LIJVAP]X[KRTPEI]R:89-92,RR:[KR]R:91-92,ATKR:[LIJVAP]X[KRTPEI]R:131-134,KR:[KR]R:133-134,PPPR:[LIJVAP]X[KRTPEI]R:290-293,KR:[KR]R:304-305	RKLI:30-33,HRFK:44-47,KRMS:58-61,RGLA:66-69,RSLS:92-95,KGMG:120-123,KRWT:133-136,HELG:198-201,HTLG:202-205,HTFP:295-298	0	0	0	SignalP3NN:20,SignalP3HMM:20,SignalP4:20,SignalP5:20,DeepSig:20,Phobius:20,SignalP6:20	1	1
XPS72059.1	0.214	1.243	1.742	Vdlsc1,Pslsc1	.	.	.	0	0	0	PF00857	Family:Isochorismatase	0	.	0	0.277	0.396	.	.	0.693	0.382	0.38	0.3	1	1	0	0	28610.5	260	-6.5	5.293	2	79	131	87	31	140	63	31	32	1.216	VKER:[LIJVAP]X[KRTPEI]R:130-133	KSLL:3-6,KVYE:56-59,HHWP:64-67,HCIP:116-119,HQFT:167-170,HGIE:179-182,KELK:229-232,KQYV:254-257	0	0	0	SignalP3NN:18,SignalP3HMM:18,SignalP4:18,SignalP5:18,DeepSig:18,Phobius:18,SignalP6:18	1	1
XPS71112.1	0.213	-1.845	2.918	.	.	.	.	0	0	0	PF00173	Domain:Cyt-b5	0	.	0	0	0.085	.	.	0.839	0.048	0.262	0.24	1	1	0	0	38807.6	365	3	7.187	1	118	226	88	25	198	73	40	33	0.496	VPKR:[LIJVAP]X[KRTPEI]R:39-42,KR:[KR]R:41-42,PAKR:[LIJVAP]X[KRTPEI]R:52-55,KR:[KR]R:54-55,LGQR:LXXR:70-73,IQPR:[LIJVAP]X[KRTPEI]R:143-146,VPPR:[LIJVAP]X[KRTPEI]R:196-199,RR:[KR]R:317-318	KVYN:298-301,KLFM:326-329,HPWV:332-335	1	0	0	SignalP3NN:25,SignalP3HMM:25,SignalP4:25,DeepSig:25,Phobius:28	1	1
XPS68533.1	0.212	-1.517	3.145	.	.	.	.	0	0	0	.	.	0	.	0	0	0.059	.	.	0.743	0.005	0.409	0.68	1	1	0	0	62794.7	608	0	6.588	0	241	387	189	21	337	84	42	42	0.503	KR:[KR]R:155-156,KR:[KR]R:316-317,LNFR:LXXR:322-325,PERR:[LIJVAP]X[KRTPEI]R:524-527,RR:[KR]R:526-527	KMMQ:274-277,RGLS:317-320,KDIA:326-329,RQIN:331-334,KQID:551-554	0	0	0	SignalP3NN:20,SignalP3HMM:20,SignalP4:20,SignalP5:20,DeepSig:20,Phobius:20,SignalP6:20	1	1
XPS68331.1	0.205	0.341	2.41	.	.	.	.	0	0	0	PF00226,PF13181	Domain:DnaJ,Repeat:TPR_8	0	.	0	0	0.108	0.765	.	.	0.545	0.266	0	1	1	0	0	57926.4	518	5	7.279	6	143	240	142	52	263	157	84	73	1	RR:[KR]R:69-70,LLQR:LXXR:101-104,LRRR:[LIJVAP]X[KRTPEI]R&LXXR:244-247,RR:[KR]R:245-246,RR:[KR]R:264-265,LIDR:LXXR:274-277,LLNR:LXXR:348-351,LLKR:[LIJVAP]X[KRTPEI]R&LXXR:390-393,KR:[KR]R:392-393,ADER:[LIJVAP]X[KRTPEI]R:409-412,KR:[KR]R:415-416,LKER:[LIJVAP]X[KRTPEI]R&LXXR:459-462	KNYL:62-65,HDFD:85-88,KVLD:89-92,KDYE:119-122,HLLQ:195-198,KGLK:223-226,KNLE:249-252,KNMK:253-256,RQFA:265-268,KLLI:272-275,HGLL:346-349,RELE:354-357,RTLD:366-369,HTLL:388-391,KDYY:397-400,KVLG:401-404,REIK:412-415,RAWR:416-419,KMYH:423-426,KKMA:442-445	1	0	0	SignalP3NN:18,SignalP3HMM:18,SignalP4:18,SignalP5:18,DeepSig:18,Phobius:18,SignalP6:18	1	1
XPS74595.1	0.205	1.338	3.309	.	.	.	.	0	0	0	.	.	0	.	0	0	0.117	.	0.708	.	0.949	0.753	0.95	1	1	0	0	49027.7	464	7.5	8.123	17	194	310	109	48	258	71	40	31	0.785	KR:[KR]R:72-73,LEAR:LXXR:80-83	KSLE:78-81,RTFW:83-86,KQLA:205-208,KTLD:237-240,KTFP:354-357,RKFG:377-380,KGFG:409-412,RLFS:416-419,KKFT:420-423,KSYT:443-446	0	0	0	SignalP3NN:15,SignalP3HMM:15,SignalP5:15,DeepSig:15,Phobius:20,SignalP6:21	1	1
XPS68413.1	0.203	0.348	2.424	MpChi,MrChi,MoChi1	.	.	.	0	0	0	PF00704	Domain:Glyco_hydro_18	1	GH18	0	0	0.08	.	.	0.56	0.12	0.419	0.72	1	1	0	0	59213.6	536	-7	5.157	4	188	311	130	75	283	111	54	57	1.059	LRAR:LXXR:2-5,VEER:[LIJVAP]X[KRTPEI]R:38-41,AMIR:[LIJVAP]X[KRTPEI]R:256-259,LYGR:LXXR:400-403,KR:[KR]R:476-477,LGGR:LXXR:506-509	RSLR:5-8,KPYT:90-93,RAIG:136-139,RKFF:149-152,HVLY:163-166,KQLQ:207-210,RNLK:217-220,KHMD:235-238,KKFA:248-251,RDYG:259-262,KAIR:287-290,KALD:291-294,KNMP:328-331,HDIS:333-336,RAFT:403-406,KDLP:431-434,KAFD:532-535	0	0	0	SignalP5:23,Phobius:23,SignalP6:23,SignalP3NN:27,SignalP3HMM:27,SignalP4:27,DeepSig:27	1	1
XPS70571.1	0.201	-2.152	-0.145	.	.	.	.	0	0	0	.	.	0	.	0	0.002	0.131	.	0.86	.	0.03	0.421	0.84	1	1	1	0	21376.4	208	-7	4.007	12	104	148	51	20	114	18	6	12	0.632	.	RQYW:40-43	0	0	0	SignalP3NN:18,SignalP3HMM:18,SignalP4:18,SignalP5:18,DeepSig:18,Phobius:18,SignalP6:18	1	1
XPS76618.1	0.2	2.232	3.296	.	.	.	.	0	0	0	.	.	0	.	0	0.997	0.523	.	.	0.703	0.912	0.445	0.73	1	1	0	0	4810.63	43	5.5	11.802	3	15	27	8	4	26	8	7	1	0.5	ALRR:[LIJVAP]X[KRTPEI]R:25-28,RR:[KR]R:27-28	.	0	0	0	SignalP3HMM:29	0	1
XPS74100.1	0.199	1.619	2.319	.	.	.	.	0	0	0	PF00190	Domain:Cupin_1	0	.	0	0.619	0.57	.	.	0.504	0.955	0.486	0.63	1	1	0	0	27690.6	262	-0.5	6.238	4	94	156	88	24	153	45	23	22	0.904	ALPR:[LIJVAP]X[KRTPEI]R:20-23,AVKR:[LIJVAP]X[KRTPEI]R:56-59,KR:[KR]R:58-59,VHPR:[LIJVAP]X[KRTPEI]R:131-134	RGMA:23-26,RDLF:48-51,KRFQ:58-61,RLLT:62-65,KNLT:77-80,KTID:230-233,KNIE:235-238,KAIP:242-245	0	0	0	SignalP3NN:20,SignalP3HMM:20,SignalP4:20,SignalP5:20,DeepSig:20,Phobius:20,SignalP6:20	1	1
XPS75389.1	0.199	5.414	3.252	.	.	.	.	0	0	0	.	.	0	.	0	0.863	0.773	.	0.713	.	0.887	0.425	0.92	1	1	0	0	16596.9	154	2.5	7.589	6	57	94	42	17	88	24	14	10	1.118	.	HFLN:32-35,HDIG:73-76,KSWS:80-83,RTWE:104-107,KCFT:127-130,KNLK:149-152	0	0	0	SignalP3NN:46,SignalP6:46	1	0
XPS68694.1	0.194	-1.98	3.281	.	.	.	.	0	0	0	PF00251,PF08244	Domain:Glyco_hydro_32N,Domain:Glyco_hydro_32C	0	GH32	0	0	0.029	.	.	0.947	0.309	0.369	0.63	1	1	0	0	71266.1	643	-39.5	4.172	2	217	371	148	101	350	121	45	76	1.021	LFDR:LXXR:48-51,VSRR:[LIJVAP]X[KRTPEI]R:341-344,RR:[KR]R:343-344,RR:[KR]R:377-378,ALPR:[LIJVAP]X[KRTPEI]R:403-406,LGAR:LXXR:444-447,LTTR:[LIJVAP]X[KRTPEI]R&LXXR:576-579	HFIS:57-60,KDLV:104-107,HWYM:238-241,HYYV:313-316,REMY:406-409,HDLV:414-417,RALP:447-450,RSII:471-474,HIYY:510-513,RFWL:573-576,RIYP:579-582,KTWE:606-609	0	0	0	SignalP3NN:17,SignalP3HMM:17,SignalP4:17,SignalP5:17,DeepSig:17,Phobius:17,SignalP6:17	1	1
XPS69420.1	0.193	-2.116	2.964	.	.	.	.	0	0	0	PF00732,PF05199	Domain:GMC_oxred_N,Domain:GMC_oxred_C	0	AA3_2,AA3,AA3_1,AA3_3	0	0	0.029	.	.	0.884	0.424	0.444	0.67	1	1	0	0	66395.7	615	9.5	9.177	2	204	359	204	63	355	117	65	52	0.923	AVKR:[LIJVAP]X[KRTPEI]R:23-26,KR:[KR]R:25-26,RR:[KR]R:240-241,KR:[KR]R:290-291,RR:[KR]R:506-507	RSLV:6-9,KTYD:35-38,KEFN:167-170,KVMW:197-200,RSYY:241-244,KLIT:254-257,KVYA:286-289,KILQ:304-307,KDFA:326-329,RQIV:400-403,RGYE:427-430,KAIT:433-436,RPLS:464-467,RGYV:468-471,KTML:495-498,RHWK:507-510,RVYG:571-574,KNLS:576-579,RNIF:612-615	1	0	0	SignalP3NN:20,SignalP3HMM:20,SignalP4:20,SignalP5:20,DeepSig:20,Phobius:20,SignalP6:20	1	1
XPS70251.1	0.19	-1.647	3.311	.	.	.	.	0	0	0	.	.	0	.	0	0	0.005	.	.	0.764	0.135	0.475	0.6	1	1	0	0	6278.29	60	5	12.227	0	26	39	20	4	32	6	6	0	0.429	.	.	0	0	0	SignalP3NN:18,SignalP4:18,SignalP5:18,DeepSig:18,Phobius:18,SignalP6:18,SignalP3HMM:20	1	1
XPS69347.1	0.19	-1.087	3.221	.	.	.	.	0	0	0	PF00450	Domain:Peptidase_S10	0	.	0	0	0.03	.	.	0.547	0.044	0.393	0.74	1	1	0	0	64303.6	587	-12	4.745	10	198	336	148	85	338	107	49	58	1.116	KR:[KR]R:568-569,KR:[KR]R:584-585	KLYA:7-10,KSYS:59-62,HVFW:72-75,KPFN:120-123,KTLQ:203-206,KGFN:218-221,KNIT:245-248,HKID:251-254,RYLT:351-354,KAIG:374-377,KKLL:410-413,RIYE:476-479,RALK:498-501,RSMG:569-572	1	0	0	SignalP3NN:22,SignalP3HMM:22,SignalP4:22,SignalP5:22,DeepSig:22,Phobius:22,SignalP6:22	1	1
XPS72656.1	0.188	-6.106	-1.302	.	.	.	.	0	0	0	.	.	0	.	0	0	0.031	.	.	0.749	0.07	0.442	0.33	0	0	0	0	36755.5	356	-9	5.057	0	148	230	99	22	178	79	38	41	0.355	PTRR:[LIJVAP]X[KRTPEI]R:99-102,RR:[KR]R:101-102,IFER:[LIJVAP]X[KRTPEI]R:119-122,KR:[KR]R:221-222,ARTR:[LIJVAP]X[KRTPEI]R:294-297	KKLL:31-34,RRIH:101-104,KRLS:221-224,HFMS:251-254,KGLE:289-292,RPFK:353-356	0	1	0	.	0	0
XPS75851.1	0.187	-0.814	2.726	.	.	.	.	0	0	0	.	.	0	.	0	0	0.194	.	.	0.641	0.964	0.252	0.25	1	1	0	0	44214.5	398	-4.5	5.901	4	130	211	105	57	214	106	54	52	0.908	KR:[KR]R:62-63,KR:[KR]R:109-110,LMQR:LXXR:327-330	HNIK:34-37,KKFT:82-85,RSLG:155-158,KDYQ:196-199,RAFS:248-251,KNIR:266-269,KTLR:294-297,HALL:312-315,KELG:332-335,KTIT:337-340,HGYK:394-397	0	0	0	SignalP3NN:19,SignalP3HMM:19,SignalP4:19,DeepSig:19,Phobius:19,SignalP6:19	1	1
XPS81510.1	0.186	-1.855	2.316	.	.	.	.	0	0	0	PF01828	Family:Peptidase_A4	0	.	0	0	0.108	.	.	0.645	0.011	0.532	0.62	1	1	0	0	31595.2	284	-15.5	4.242	5	91	159	74	40	156	59	23	36	1.228	RR:[KR]R:46-47,VKER:[LIJVAP]X[KRTPEI]R:49-52	RNLI:28-31,HRIQ:110-113,KWLG:275-278	0	0	0	SignalP3NN:19,SignalP3HMM:19,SignalP4:19,SignalP5:19,Phobius:19,SignalP6:19,DeepSig:27	1	1
XPS76360.1	0.186	-2.585	0.436	.	.	.	.	0	0	0	PF06682	Family:SARAF	0	.	0	0.069	0.317	.	.	0.634	0.052	0.349	0.57	1	1	1	0	33313.5	316	0	6.479	6	131	196	65	34	181	64	33	31	0.567	LTLR:LXXR:33-36,RR:[KR]R:44-45,RR:[KR]R:315-316	RLLN:2-5,KGLD:37-40,KGLY:60-63,HWWG:142-145,KTLG:157-160,RQWV:185-188	0	0	0	SignalP6:14,SignalP3NN:19,SignalP3HMM:19,SignalP4:19,SignalP5:19,DeepSig:19,Phobius:19	1	1
XPS80153.1	0.182	0.653	1.047	.	.	.	.	0	0	0	PF07859	Domain:Abhydrolase_3	0	.	0	0.969	0.597	.	.	0.558	0.734	0.557	0.4	1	1	1	0	11471.1	109	-2.5	4.734	6	47	63	43	8	67	20	9	11	0.667	.	RSIL:106-109	0	0	0	SignalP3NN:25,SignalP3HMM:25,SignalP4:25	1	1
XPS75963.1	0.181	1.004	1.693	CfTom1	.	.	.	0	0	0	PF11790	Family:Glyco_hydro_cc	0	GH128	0	0.001	0.479	.	.	0.802	0.1	0.526	0.58	1	1	0	0	33385.6	309	-2	5.654	4	115	184	80	43	187	50	25	25	0.821	KR:[KR]R:27-28,KR:[KR]R:95-96	RGLC:28-31,KNIQ:70-73,RQLD:96-99,KKLG:141-144,HWYG:181-184	0	0	0	SignalP3NN:21,SignalP3HMM:21,SignalP4:21,SignalP5:21,DeepSig:21,Phobius:21,SignalP6:21	1	1
XPS78287.1	0.18	-1.886	3.121	.	.	.	.	0	0	0	PF01565,PF08031	Domain:FAD_binding_4,Domain:BBE	0	AA7	0	0	0.051	.	.	0.873	0.101	0.62	0.67	1	1	0	0	50497.5	472	5	8.433	4	171	287	167	47	280	79	43	36	0.816	LQAR:LXXR:42-45,LIER:[LIJVAP]X[KRTPEI]R&LXXR:362-365,RR:[KR]R:426-427,VLKR:[LIJVAP]X[KRTPEI]R:454-457,KR:[KR]R:456-457	RFLL:2-5,KALV:29-32,KTFN:91-94,RIYL:257-260,KPIY:293-296,RDLW:416-419,RVLK:453-456,RKWD:457-460,KGFF:462-465	1	0	0	SignalP3NN:16,SignalP4:16,SignalP3HMM:18,SignalP5:18,DeepSig:18,SignalP6:18,Phobius:25	1	1
XPS77441.1	0.18	-2.154	3.293	.	.	.	.	0	0	0	PF01915,PF14310,PF00933	Domain:Glyco_hydro_3_C,Family:Fn3-like,Domain:Glyco_hydro_3	0	GH3	0	0	0.009	.	.	0.962	0.064	0.155	0.45	1	1	0	0	87563.6	812	-30	4.487	6	288	472	241	95	461	156	67	89	0.854	AIPR:[LIJVAP]X[KRTPEI]R:99-102,LAIR:[LIJVAP]X[KRTPEI]R&LXXR:115-118,ALIR:[LIJVAP]X[KRTPEI]R:415-418,LIRR:LXXR:416-419,RR:[KR]R:418-419,IQER:[LIJVAP]X[KRTPEI]R:487-490,LMRR:[LIJVAP]X[KRTPEI]R&LXXR:768-771,RR:[KR]R:770-771	RAFV:71-74,RTLM:138-141,RGFA:144-147,RNWE:176-179,KHWI:209-212,RTIH:245-248,RIMT:362-365,KDFP:374-377,REFN:397-400,KNIA:440-443,KQLN:454-457,RAIQ:485-488,KTWA:530-533,RYFD:653-656,HNIS:658-661,RPIM:696-699,KQLR:746-749,KVYL:753-756,RDLS:771-774,RDIV:799-802	0	0	0	SignalP3NN:16,SignalP3HMM:16,SignalP4:16,DeepSig:16,SignalP5:18,Phobius:18,SignalP6:18	1	1
XPS78548.1	0.18	-2.115	3.208	.	.	.	.	0	0	0	PF00135	Domain:COesterase	0	.	0	0	0.01	.	.	0.915	0.069	0.29	0.49	1	1	0	0	56275.1	517	-15	4.577	7	177	296	149	63	298	91	40	51	0.864	LGKR:[LIJVAP]X[KRTPEI]R&LXXR:56-59,KR:[KR]R:58-59,ITPR:[LIJVAP]X[KRTPEI]R:103-106,LDQR:LXXR:203-206,LKTR:[LIJVAP]X[KRTPEI]R&LXXR:308-311	HFLG:45-48,RRWL:59-62,RNYS:106-109,KHIV:172-175,RALA:338-341,RNFT:342-345,RTYG:366-369,RYLY:403-406,HDIA:434-437	1	1	0	SignalP3NN:19,SignalP3HMM:19,SignalP4:19,SignalP5:19,DeepSig:19,Phobius:19,SignalP6:19	1	1
XPS78365.1	0.18	-1.674	3.279	.	.	.	.	0	0	0	.	.	0	.	0	0	0.04	.	.	0.9	0.98	0.453	0.45	1	1	0	0	73083.9	677	-21	4.64	8	237	419	170	79	370	144	65	79	0.764	LKTR:[LIJVAP]X[KRTPEI]R&LXXR:30-33,AWRR:[LIJVAP]X[KRTPEI]R:200-203,RR:[KR]R:202-203,ANTR:[LIJVAP]X[KRTPEI]R:259-262,VPPR:[LIJVAP]X[KRTPEI]R:315-318,RR:[KR]R:318-319,PHTR:[LIJVAP]X[KRTPEI]R:339-342	RNFN:76-79,KFYH:120-123,HTLH:136-139,KSYQ:165-168,KFLT:236-239,HELS:297-300,HLLG:301-304,RAYT:319-322,HTMR:357-360,HQIG:363-366,RGYN:430-433,RYWS:492-495,RQLV:500-503,HFYV:527-530,KGWE:618-621	0	0	0	SignalP3NN:24,SignalP3HMM:24,SignalP4:24,SignalP5:24,Phobius:24,SignalP6:24	1	1
XPS81187.1	0.18	-2.393	2.631	.	.	.	.	0	0	0	PF00141	Domain:peroxidase	0	AA2	0	0	0.009	.	.	0.788	0.006	0.309	0.55	1	1	0	0	57639.7	534	-17.5	4.604	6	189	322	158	54	287	119	53	66	0.941	PCTR:[LIJVAP]X[KRTPEI]R:53-56,KR:[KR]R:254-255	HDMA:75-78,KKMF:172-175,HTMG:193-196,KTFP:201-204,KRIF:254-257,KALA:266-269,KTFQ:273-276,RMLD:285-288,KPYI:306-309,RLLT:327-330,HEFY:383-386,KSFN:396-399,RKYA:463-466	0	0	0	SignalP3NN:21,SignalP4:21,SignalP5:21,Phobius:21	1	0
XPS69758.1	0.18	-2.386	3.068	.	.	.	.	0	0	0	PF16499,PF17801	Family:Melibiase_2,Domain:Melibiase_C	0	GH27	0	0	0.009	.	.	0.961	0.017	0.164	0.58	1	1	0	0	59173	545	-16.5	4.605	7	200	314	162	66	302	110	49	61	0.959	LTRR:[LIJVAP]X[KRTPEI]R&LXXR:311-314,RR:[KR]R:313-314,APKR:[LIJVAP]X[KRTPEI]R:489-492,KR:[KR]R:491-492	KALG:93-96,HNLG:100-103,RDIH:183-186,RSIW:220-223,HSLD:287-290,RRYT:313-316,RQIL:331-334,KDLD:367-370,HELR:383-386,KVIS:417-420,KTLG:455-458,KRWA:491-494	0	0	0	SignalP3NN:17,SignalP3HMM:17,SignalP4:17,SignalP5:17,DeepSig:17,Phobius:17,SignalP6:17	1	1
XPS73606.1	0.18	-2.159	3.048	.	.	.	.	0	0	0	PF00135	Domain:COesterase	0	.	0	0	0.009	.	.	0.864	0.038	0.398	0.44	1	1	0	0	62165.5	568	-18	4.517	8	187	330	153	74	328	106	46	60	0.899	LRFR:LXXR:64-67,LGLR:LXXR:187-190,IQKR:[LIJVAP]X[KRTPEI]R:318-321,KR:[KR]R:320-321,RR:[KR]R:408-409,ALRR:[LIJVAP]X[KRTPEI]R:421-424,RR:[KR]R:423-424	KPIV:156-159,KLFR:238-241,RTLP:286-289,HALA:372-375,RRLT:423-426,RDLS:489-492,RFMS:493-496,KDYV:533-536	0	0	0	SignalP3NN:21,SignalP3HMM:21,SignalP4:21,SignalP5:21,DeepSig:21,Phobius:21,SignalP6:21	1	1
XPS78773.1	0.18	-1.875	3.01	.	.	.	.	0	0	0	PF00135	Domain:COesterase	0	.	0	0	0.015	.	.	0.77	0.328	0.344	0.58	1	1	0	0	60149.6	561	0.5	6.705	5	189	327	182	64	344	82	42	40	0.945	VEKR:[LIJVAP]X[KRTPEI]R:20-23,KR:[KR]R:22-23,LPGR:LXXR:188-191,LDQR:LXXR:204-207,LTRR:[LIJVAP]X[KRTPEI]R&LXXR:442-445,RR:[KR]R:444-445	REIL:191-194,HTYK:250-253,KPLF:255-258,KYLQ:309-312,RVFL:445-448,KSWS:459-462,KSIR:496-499,KVIE:528-531	0	1	0	SignalP3NN:15,SignalP3HMM:15,SignalP4:15,SignalP5:15,DeepSig:15,Phobius:15,SignalP6:23	1	1
XPS75525.1	0.18	-2.232	3.132	.	.	.	.	0	0	0	PF00144	Domain:Beta-lactamase	0	.	0	0	0.009	.	.	0.924	0.006	0.491	0.62	1	1	0	0	64405.5	595	-15.5	4.641	2	202	348	178	60	330	118	53	65	0.908	LMFR:LXXR:218-221,PGER:[LIJVAP]X[KRTPEI]R:222-225,LSAR:LXXR:440-443,LYMR:LXXR:485-488,VVTR:[LIJVAP]X[KRTPEI]R:591-594	KGLL:28-31,KALR:51-54,KPYN:55-58,KSFA:117-120,RSLL:142-145,HLLS:149-152,RGIT:160-163,HSFF:270-273,KYIH:316-319,KTYG:376-379,RSWM:391-394,KALS:438-441,KTYA:473-476,RELV:488-491,RFFS:514-517	0	1	0	SignalP3NN:20,SignalP3HMM:20,SignalP4:20,SignalP5:20,DeepSig:20,Phobius:20,SignalP6:20	1	1
XPS71369.1	0.18	-1.676	3.274	.	.	.	.	0	0	0	PF00135	Domain:COesterase	0	.	0	0	0.012	.	.	0.826	0.775	0.6	0.63	1	1	0	0	58481	537	9.5	8.739	6	190	312	150	67	304	93	53	40	0.924	LHPR:[LIJVAP]X[KRTPEI]R&LXXR:21-24,RR:[KR]R:54-55,LFKR:[LIJVAP]X[KRTPEI]R&LXXR:237-240,KR:[KR]R:239-240,LEGR:LXXR:521-524	RRIP:54-57,RGFD:86-89,RPWQ:110-113,KWIQ:195-198,KYIH:199-202,KKLF:235-238,RAMS:240-243,KTYR:250-253,HDIA:385-388,KQLY:391-394,RDLV:417-420,RGIE:516-519	0	0	0	Phobius:17,SignalP3NN:18,SignalP3HMM:18,SignalP4:18,SignalP5:18,DeepSig:18,SignalP6:24	1	1
XPS79449.1	0.18	-1.822	3.273	.	.	.	.	0	0	0	PF00135	Domain:COesterase	0	CE1	0	0	0.016	.	.	0.882	0.649	0.408	0.72	1	1	0	0	56717.9	532	8	8.591	6	198	330	170	67	324	87	49	38	0.756	LGIR:[LIJVAP]X[KRTPEI]R&LXXR:51-54,VAPR:[LIJVAP]X[KRTPEI]R:72-75,LPGR:LXXR:526-529	KKYV:69-72,RVWK:108-111,RGFT:386-389,RYFG:410-413,RLYN:419-422,KTLV:494-497	0	0	0	SignalP3NN:20,SignalP3HMM:20,SignalP4:20,SignalP5:20,DeepSig:20,Phobius:20,SignalP6:20	1	1
XPS71465.1	0.18	-2.257	2.525	.	.	.	.	0	0	0	PF07971,PF17678	Repeat:Glyco_hydro_92,Domain:Glyco_hydro_92N	0	GH92	0	0	0.094	.	.	0.934	0.916	0.236	0.47	1	1	1	0	82671.5	755	-22.5	4.614	5	264	438	187	104	413	152	68	84	0.949	ITPR:[LIJVAP]X[KRTPEI]R:466-469,VATR:[LIJVAP]X[KRTPEI]R:490-493,LVPR:[LIJVAP]X[KRTPEI]R&LXXR:527-530,LKKR:[LIJVAP]X[KRTPEI]R&LXXR:572-575,KR:[KR]R:574-575	HKIA:4-7,KIWG:72-75,HVLP:165-168,RGLG:171-174,RIFA:224-227,RSLI:374-377,RAIE:476-479,RNWR:508-511,KRIG:574-577,RAIS:624-627,KLYN:628-631,KTLI:684-687,KSWV:713-716	0	0	0	SignalP4:18,DeepSig:18,Phobius:18,SignalP6:18,SignalP3NN:19,SignalP5:19	1	0
XPS77615.1	0.18	-1.685	3.254	.	.	.	.	0	0	0	PF00135	Domain:COesterase	0	.	0	0	0.065	.	.	0.931	0.816	0.449	0.65	1	1	0	0	60722.5	558	-17	4.502	4	195	326	152	73	319	95	41	54	0.944	LQKR:[LIJVAP]X[KRTPEI]R&LXXR:73-76,KR:[KR]R:75-76,KR:[KR]R:103-104	KGIP:56-59,KPLQ:71-74,RQMS:104-107,KGIV:179-182,HMLN:257-260,KGLI:265-268,RNMS:293-296,RELS:318-321,RFLE:397-400,HNLN:500-503	0	1	0	SignalP3NN:18,SignalP3HMM:18,SignalP4:18,SignalP5:18,DeepSig:18,Phobius:18,SignalP6:18	1	1
XPS74084.1	0.18	-2.167	3.12	.	.	.	.	0	0	0	PF07731,PF07732,PF00394	Domain:Cu-oxidase_2,Domain:Cu-oxidase_3,Domain:Cu-oxidase	0	AA1_3,AA1,AA1_1,AA1_2	0	0	0.009	.	.	0.932	0.491	0.477	0.64	1	1	0	0	63781	577	-22.5	4.652	8	188	338	169	83	313	124	56	68	1.073	PPRR:[LIJVAP]X[KRTPEI]R:493-496,RR:[KR]R:495-496	KSFF:2-5,KAYS:24-27,HSID:58-61,REYW:75-78,HGFR:133-136,HTYT:160-163,KKYR:259-262,HKMT:281-284,RAIP:325-328,RGIV:342-345,HVIW:416-419,HPIH:462-465,HDFY:469-472,KAWE:558-561	0	0	0	SignalP3NN:16,SignalP3HMM:16,SignalP4:16,SignalP5:16,DeepSig:16,Phobius:18,SignalP6:24	1	1
XPS81744.1	0.18	-1.242	3.307	.	.	.	.	0	0	0	.	.	0	.	0	0	0.085	.	.	0.757	0.091	0.434	0.59	1	1	0	0	44365.6	418	-6.5	4.965	4	162	268	107	38	229	82	39	43	0.667	KR:[KR]R:160-161,RR:[KR]R:187-188	RFLA:3-6,HTWI:21-24,RGMI:44-47,KVFI:68-71,RYME:106-109,RCYE:174-177,KPYT:224-227,HVIR:402-405,RGMF:413-416	0	0	0	SignalP3NN:20,SignalP3HMM:20,SignalP4:20,SignalP5:20,DeepSig:20,Phobius:20,SignalP6:20	1	1
XPS71466.1	0.18	-1.55	3.231	.	.	.	.	0	0	0	PF07971,PF17678	Repeat:Glyco_hydro_92,Domain:Glyco_hydro_92N	0	GH92	0	0	0.094	.	.	0.934	0.916	0.236	0.5	1	1	0	0	72927.7	666	-14.5	4.871	6	235	384	168	91	361	134	63	71	0.993	ITPR:[LIJVAP]X[KRTPEI]R:466-469,VATR:[LIJVAP]X[KRTPEI]R:490-493,LVPR:[LIJVAP]X[KRTPEI]R&LXXR:527-530,LKKR:[LIJVAP]X[KRTPEI]R&LXXR:572-575,KR:[KR]R:574-575	HKIA:4-7,KIWG:72-75,HVLP:165-168,RGLG:171-174,RIFA:224-227,RSLI:374-377,RAIE:476-479,RNWR:508-511,KRIG:574-577,RAIS:624-627,KLYN:628-631,RILG:657-660,RSML:661-664	0	0	0	SignalP4:18,DeepSig:18,Phobius:18,SignalP6:18,SignalP3NN:19,SignalP5:19	1	0
XPS80978.1	0.18	-2.374	2.663	.	.	.	.	0	0	0	PF00732,PF05199	Domain:GMC_oxred_N,Domain:GMC_oxred_C	0	AA3_2,AA3,AA3_3,AA3_1	0	0	0.009	.	.	0.823	0.376	0.413	0.55	1	1	0	0	65478.6	610	-11.5	4.894	4	212	370	202	61	347	104	49	55	0.857	RR:[KR]R:4-5,LAVR:LXXR:20-23,LASR:LXXR:82-85,LGGR:LXXR:207-210,KR:[KR]R:236-237,VAER:[LIJVAP]X[KRTPEI]R:594-597	RRLL:4-7,RTFT:23-26,REFP:72-75,RSIS:106-109,HVLG:114-117,KPYY:153-156,RDYA:169-172,RNLG:205-208,HPLI:246-249,RLLS:273-276,KELV:306-309,KILM:319-322,HPLN:353-356,KAFE:507-510,HTMA:586-589	0	0	0	SignalP3NN:21,SignalP3HMM:21,SignalP4:21,SignalP5:21,DeepSig:21,Phobius:21,SignalP6:21	1	1
XPS80805.1	0.18	-2.032	3.084	.	.	.	.	0	0	0	PF00732,PF05199	Domain:GMC_oxred_N,Domain:GMC_oxred_C	0	AA3_2,AA3,AA3_3	0	0	0.009	.	.	0.837	0.156	0.391	0.57	1	1	0	0	62293.2	583	-11.5	4.811	5	217	343	192	62	336	93	43	50	0.893	LANR:LXXR:39-42,AEKR:[LIJVAP]X[KRTPEI]R:123-126,KR:[KR]R:125-126,KR:[KR]R:578-579	HTLP:4-7,KSIA:71-74,KGIG:107-110,RQID:126-129,KYYV:146-149,HGYD:173-176,RAFY:238-241,RTLQ:270-273,KSLG:303-306,HQLD:394-397,RELF:470-473,RELG:527-530,KVYG:538-541	0	0	0	SignalP3NN:17,SignalP4:17,DeepSig:17,SignalP3HMM:21,SignalP5:21,Phobius:21,SignalP6:21	1	1
XPS78184.1	0.18	-0.948	3.206	.	.	.	.	0	0	0	PF03659	Family:Glyco_hydro_71	0	GH71	0	0	0.151	.	.	0.725	0.018	0.299	0.48	1	1	0	0	47501.3	434	-6	4.985	4	152	255	128	54	239	86	41	45	1.168	RR:[KR]R:336-337	RKFS:23-26,RKMV:34-37,HFMI:40-43,KVFI:97-100,KKLE:117-120,RCFV:134-137,KLFD:148-151,KAIR:153-156,KTYM:224-227,KAWN:241-244,HYIG:278-281	0	0	0	SignalP3NN:19,SignalP3HMM:19,SignalP4:19,SignalP5:19,DeepSig:19,Phobius:19,SignalP6:19	1	1
XPS68205.1	0.18	-1.865	3.258	.	.	.	.	0	0	0	PF03572	Family:Peptidase_S41	0	.	0	0	0.01	.	.	0.858	0.36	0.392	0.63	1	1	0	0	81377.8	754	-8.5	5.077	7	268	442	209	92	426	133	64	69	0.942	AQPR:[LIJVAP]X[KRTPEI]R:24-27,IQTR:[LIJVAP]X[KRTPEI]R:36-39,LQDR:LXXR:236-239,ARPR:[LIJVAP]X[KRTPEI]R:296-299,KR:[KR]R:705-706,LKPR:[LIJVAP]X[KRTPEI]R&LXXR:715-718,RR:[KR]R:718-719	RSLP:27-30,KQIV:65-68,KLLI:88-91,KPYI:95-98,KNIS:206-209,RTIQ:290-293,KKWF:313-316,KALA:394-397,KLIL:402-405,KQLF:423-426,KSLS:463-466,KTIA:571-574,RLYY:667-670,KKMQ:729-732	1	0	0	SignalP3NN:18,SignalP3HMM:18,SignalP4:18,SignalP5:18,DeepSig:18,Phobius:18,SignalP6:18	1	1
XPS77108.1	0.18	-2.091	3.168	.	.	.	.	0	0	0	PF01565,PF08031	Domain:FAD_binding_4,Domain:BBE	0	AA7	0	0	0.009	.	.	0.906	0.305	0.397	0.71	1	1	0	0	70997.8	660	-10.5	5.018	8	238	392	207	84	398	115	55	60	0.818	AHTR:[LIJVAP]X[KRTPEI]R:86-89,RR:[KR]R:89-90,RR:[KR]R:92-93,LNLR:LXXR:218-221	KLFA:3-6,KTMP:98-101,KNFD:152-155,RSLN:216-219,HDYN:229-232,HGLK:246-249,RFFW:397-400,RTYS:410-413,KTLA:437-440,RFLP:495-498,KAMK:521-524,RNLQ:548-551,RNYP:611-614,RLLE:615-618,KKYD:621-624	0	0	0	SignalP3NN:17,SignalP3HMM:17,SignalP4:17,SignalP5:17,DeepSig:17,Phobius:17,SignalP6:17	1	1
XPS68298.1	0.18	0.903	3.291	CfTom1	.	.	.	0	0	0	.	.	0	GH17	0	0	0.041	.	.	0.662	0.814	0.514	0.47	1	1	0	0	47020.2	447	-16	4.371	5	170	297	132	34	241	80	33	47	0.689	KR:[KR]R:25-26,AIRR:[LIJVAP]X[KRTPEI]R:304-307,RR:[KR]R:306-307,ASIR:[LIJVAP]X[KRTPEI]R:409-412	KSII:2-5,RPLN:20-23,RDYV:26-29,RIYG:221-224,KLFS:282-285,HDMT:294-297,HPFF:348-351,KALA:406-409,RYWG:441-444	0	0	0	SignalP3NN:19,SignalP3HMM:19,SignalP4:19,SignalP5:19,DeepSig:19,Phobius:19,SignalP6:19	1	1
XPS71238.1	0.18	-2.161	3.017	.	.	.	.	0	0	0	PF03572	Family:Peptidase_S41	0	.	0	0	0.009	.	.	0.851	0.025	0.434	0.37	1	1	0	0	83967.6	774	-27.5	4.465	6	269	454	234	95	434	155	66	89	0.896	LYAR:LXXR:26-29,LQDR:LXXR:222-225,LGGR:LXXR:584-587,LAKR:[LIJVAP]X[KRTPEI]R&LXXR:725-728,KR:[KR]R:727-728,LSRR:[LIJVAP]X[KRTPEI]R&LXXR:737-740,RR:[KR]R:739-740,RR:[KR]R:745-746	KELP:175-178,KAYV:179-182,KVLI:283-286,KTWF:299-302,HNLI:351-354,KFLA:390-393,KKLV:401-404,KLLF:423-426,RAFE:439-442,RELV:460-463,HGYG:536-539,KYIS:580-583,RILY:682-685,KQMT:687-690,RELT:728-731,KVLS:735-738,RRMH:739-742,RELR:746-749	0	0	0	SignalP3NN:19,SignalP4:19,DeepSig:19,SignalP5:24,Phobius:24,SignalP6:29	1	0
[truncated: 13,380 more rows]
[truncated: 34 more columns]
