# Supplementary material for: Comparative genome analysis identifies necrosis-inducing effectors in the lentil pathogen Ascochyta lentis in isolates with distinct virulence profiles
Source: Research Square preprint supplement (doi:10.21203/rs.3.rs-7803979/v1), 2025-10-22
Supplement: Supplementary file 4 [file 51a9c0ccb705907a0ecadbc1.xlsx]

## Sheet: top 50
	Kewell		P9424	Candidate ID	Nuc identity	SNPs	AA identity	AA changes	effector_score	manual_effector_score	manual_secretion_score	effector_matches	phibase_genes	phibase_phenotypes	phibase_ids	has_phibase_effector_match	has_phibase_virulence_match	has_phibase_lethal_match	pfam_ids	pfam_names	has_pfam_virulence_match	dbcan_matches	has_dbcan_virulence_match	effectorp1	effectorp2	effectorp3_cytoplasmic	effectorp3_apoplastic	effectorp3_noneffector	deepredeff_fungi	deepredeff_oomycete	apoplastp	is_secreted	any_signal_peptide	single_transmembrane	multiple_transmembrane	molecular_weight	residue_number	charge	isoelectric_point	aa_c_number	aa_tiny_number	aa_small_number	aa_aliphatic_number	aa_aromatic_number	aa_nonpolar_number	aa_charged_number	aa_basic_number	aa_acidic_number	fykin_gap
1	AlKewell_009152-T1		P9424_009147-T1	AlenEC003	1		1		3.941	7.117	3.312	.	.	.	.	0	0	0	.	.	0	.	0	1	0.984	0.81	0.959	.	.	.	0.88	1	1	0	0	8917.08	84	-1.5	4.93	9	37	52	21	6	47	17	8	9	1.05
2	AlKewell_004309-T1		P9424_004318-T1	AlenEC004	1		1		3.941	6.681	3.312	.	.	.	.	0	0	0	.	.	0	.	0	1	0.983	.	0.908	.	.	.	0.82	1	1	0	0	7469.56	69	3.5	8.084	8	29	41	16	9	44	12	8	4	1
3	AlKewell_001364-T1		P9424_001375-T1	AlenEC005	1		1		3.836	6.198	3.241	.	.	.	.	0	0	0	.	.	0	.	0	0.904	0.955	.	0.556	.	.	.	0.5	1	1	0	0	23615.7	215	2.5	7.69	4	76	127	61	24	117	48	26	22	1.06
4	AlKewell_000025-T1		P9424_000027-T1	AlenEC006	1		1		3.498	6.497	3.308	.	.	.	.	0	0	0	.	.	0	.	0	1	0.945	.	0.929	.	.	.	0.85	1	1	0	0	12526.3	119	7	9.116	6	47	76	34	11	70	18	13	5	1.029
5	AlKewell_003207-T1		P9424_003205-T1	AlenEC007	0.99593	1	1		3.453	6.881	3.312	.	.	.	.	0	0	0	.	.	0	.	0	1	0.984	0.501	0.796	.	.	.	0.59	1	1	0	0	7369.45	65	1	6.801	9	24	36	12	11	34	17	10	7	1.875
6	AlKewell_008769-T1		P9424_008767-T1	AlenEC008	1		1		3.276	6.936	3.312	.	.	.	.	0	0	0	.	.	0	.	0	1	0.966	0.663	0.925	.	.	.	0.87	1	1	0	0	10417.8	99	2	7.628	12	46	67	23	7	59	18	10	8	0.862
7	AlKewell_002830-T1		P9424_002828-T1	AlenEC009	1		1		3.247	6.471	3.312	.	.	.	.	0	0	0	.	.	0	.	0	1	0.95	.	0.817	.	.	.	0.84	1	1	0	0	12035.7	111	5	7.632	8	40	69	29	17	66	23	16	7	0.857
8	AlKewell_013048-T1		P9424_013023-T1	AlenEC010	1		1		3.236	8.526	3.312	RiSLM,Mg1LysM,MgxLysM,MoSlp1,CfEcp6	.	.	.	0	0	0	PF01476	Domain:LysM	1	CBM50	0	0.999	0.951	.	0.919	.	.	.	0.7	1	1	0	0	15298.3	138	5	8.246	6	46	81	34	15	71	29	18	11	1.393
9	AlKewell_007469-T1		P9424_005128-T1	AlenEC012	0.998	1	0.99398	1	3.137	8.42	3.31	LmAvrLm3	.	.	.	0	0	0	.	.	0	.	0	0.999	0.937	.	0.852	.	.	.	0.77	1	1	0	0	17890.3	166	6.5	8.175	10	66	102	46	17	88	31	20	11	1.176
10	AlKewell_005118-T1		P9424_011570-T1		1		1		3.112	7.176	2.802	.	.	.	.	0	0	0	PF00160	Domain:Pro_isomerase	1	.	0	0.952	0.818	0.663	.	.	.	.	0.46	1	1	0	0	11547.5	104	7	10.191	0	33	47	30	17	59	23	16	7	1.6
11	AlKewell_011590-T1		P9424_006145-T1		1		1		3.091	6.906	3.312	.	.	.	.	0	0	0	.	.	0	.	0	1	0.962	0.64	0.927	.	.	.	0.7	1	1	0	0	8357.34	75	0	6.453	6	29	42	15	12	41	16	9	7	1.118
12	AlKewell_006137-T1		P9424_009927-T1		0.99603	1	1		3.077	8.921	3.312	MoBas3	.	.	.	0	0	0	.	.	0	.	0	1	0.95	0.813	0.904	.	.	.	0.75	1	1	0	0	9084.29	83	0.5	6.818	8	34	51	22	10	49	19	10	9	1.105
13	AlKewell_009931-T1		P9424_009628-T1		1		1		3.069	6.873	2.528	FoeNEP1,BfNep1,VdNEP,PpNPP1,PiNPP1,PsojNIP,PaSD21-1,MpNEP1_1,MpNEP1_2	.	.	.	0	0	0	PF05630	Family:NPP1	1	.	0	0.795	0.832	.	0.78	.	.	.	0.63	1	1	0	0	26209.1	242	0	6.492	2	82	148	69	32	133	54	29	25	0.859
14	AlKewell_007958-T1		P9424_007481-T1	AlenEC011	0.99784	1	0.99412	1	3.043	4.536	3.312	.	.	.	.	0	0	0	.	.	0	.	0	0.981	0.919	.	.	0.541	.	.	0.63	1	1	0	0	16909.1	153	1	7.037	6	57	85	35	23	90	32	17	15	0.925
15	AlKewell_009630-T1		P9424_013018-T1		1		1		3.023	6.42	3.312	.	.	.	.	0	0	0	.	.	0	.	0	0.999	0.93	.	0.918	.	.	.	0.91	1	1	0	0	13158.7	125	1	7.378	8	57	82	31	13	74	19	10	9	0.853
16	AlKewell_013043-T1		P9424_007994-T1		1		1		3	6.488	3.312	.	.	.	.	0	0	0	.	.	0	.	0	1	0.939	.	0.962	.	.	.	0.95	1	1	0	0	9332.66	86	5	8.494	6	31	52	20	10	48	16	11	5	1.3
17	AlKewell_007996-T1		P9424_006689-T1		0.9971	1	1		2.98	6.565	3.312	.	.	.	.	0	0	0	.	.	0	.	0	1	0.958	.	0.926	.	.	.	0.73	1	1	0	0	11895.6	114	2.5	7.811	8	52	69	29	11	69	21	12	9	0.879
18	AlKewell_006676-T1		P9424_008151-T1		1		1		2.89	8.847	3.312	LmAvrLm4_7	.	.	.	0	0	0	PF18661	Domain:AvrLm4-7	1	.	0	1	0.964	0.64	0.789	.	.	.	0.62	1	1	0	0	14848.8	127	2	7.18	8	34	63	27	21	68	30	17	13	2
19	AlKewell_008151-T1		P9424_009926-T1		1		1		2.836	6.675	3.312	.	.	.	.	0	0	0	.	.	0	.	0	1	0.929	0.57	0.865	.	.	.	0.85	1	1	0	0	9253.7	86	6	8.5	8	36	54	25	8	47	15	11	4	1.312
20	AlKewell_007489-T1		P9424_012692-T1		1		1		2.834	5.605	2.702	.	.	.	.	0	0	0	.	.	0	.	0	0.923	0.868	0.548	0.731	.	.	.	0.56	1	1	0	0	23271.1	209	-1.5	5.994	3	65	113	53	32	112	45	23	22	1.442
21	AlKewell_009930-T1		P9424_005442-T1		1		1		2.823	5.896	3.309	.	.	.	.	0	0	0	.	.	0	.	0	0.912	0.846	.	0.89	.	.	.	0.83	1	1	0	0	11791.2	112	2.5	8.245	3	46	73	36	13	65	15	9	6	1.2
22	AlKewell_012717-T1		P9424_005446-T1		1		1		2.808	6.614	3.312	.	.	.	.	0	0	0	.	.	0	.	0	1	0.933	0.538	0.735	.	.	.	0.85	1	1	0	0	10348	96	4.5	8.155	10	40	57	24	11	60	15	10	5	1.087
23	AlKewell_005433-T1		P9424_009928-T1		1		1		2.808	6.424	3.312	.	.	.	.	0	0	0	.	.	0	.	0	1	0.939	.	0.833	.	.	.	0.91	1	1	0	0	10403.8	96	2	7.479	8	40	59	27	9	53	15	9	6	0.913
24	AlKewell_005437-T1		P9424_001936-T1		1		1		2.806	7.176	3.274	.	PELD,PELA,Bxpel1,PL1332	reduced_virulence	PHI:180,PHI:179,PHI:5550,PHI:4845	0	1	0	PF03211	Repeat:Pectate_lyase	1	PL3_2,PL3,PL3_4,PL3_5,PL3_1,PL3_3	0	1	0.887	.	0.935	.	.	.	0.95	1	1	0	0	24732.8	237	0	6.399	16	102	153	67	21	139	45	23	22	1.032
25	AlKewell_009932-T1		P9424_006159-T1		1		1		2.8	6.214	3.308	.	.	.	.	0	0	0	.	.	0	.	0	0.999	0.892	.	0.894	.	.	.	0.83	1	1	0	0	18838.4	174	1.5	7.37	10	64	111	40	16	97	34	18	16	0.93
26	AlKewell_001925-T1		P9424_007649-T1		1		1		2.788	6.222	3.285	.	.	.	.	0	0	0	PF07452	Domain:CHRD	0	.	0	0.966	0.862	0.682	0.641	.	.	.	0.83	1	1	0	0	22670.6	210	6	8.976	3	74	123	59	25	117	46	27	19	1.05
27	AlKewell_006150-T1		P9424_004765-T1		0.99561	2	0.99338	1 in SP	2.759	8.531	3.31	GoEC2,MoCDIP2,MoCDIP11,BghBEC4	.	.	.	0	0	0	PF05730	Domain:CFEM	1	.	0	1	0.922	0.509	0.713	.	.	.	0.69	1	1	0	0	16653.2	151	1.5	7.339	11	56	84	45	14	86	28	15	13	1.03
28	AlKewell_007650-T1		P9424_003212-T1		1		1		2.752	6.399	3.312	.	.	.	.	0	0	0	.	.	0	.	0	0.999	0.933	.	0.845	.	.	.	0.78	1	1	0	0	9404.59	87	1.5	7.142	6	36	53	20	13	51	15	9	6	0.905
29	AlKewell_004755-T1		P9424_012426-T1		1		1		2.747	6.607	3.312	.	.	.	.	0	0	0	.	.	0	.	0	1	0.917	0.659	0.761	.	.	.	0.66	1	1	0	0	8153.55	76	4	8.246	6	30	42	22	6	45	13	9	4	1.111
30	AlKewell_003215-T1		P9424_007955-T1		0.99713	1	0.9913	1	2.745	6.793	3.312	.	.	.	.	0	0	0	.	.	0	.	0	1	0.947	0.565	0.926	.	.	.	0.74	1	1	0	0	11917.5	115	0	6.055	12	53	75	26	7	69	18	9	9	0.688
31	AlKewell_012451-T1		P9424_011522-T1		1		1		2.727	5.722	3.31	.	.	.	.	0	0	0	.	.	0	.	0	0.906	0.822	0.791	.	.	.	.	0.17	1	1	0	0	19355.7	170	5.5	8.493	2	51	88	44	28	85	43	26	17	1.257
32	AlKewell_011542-T1		P9424_010140-T1		0.99802	2	1		2.708	5.511	2.891	MoCDIP1	.	.	.	0	0	0	PF00544	Repeat:Pectate_lyase_4	0	PL1_10,PL1_7,PL1,PL1_9,PL1_5,PL1_6,PL1_3,PL1_4,PL1_12,PL1_11,PL1_13,PL1_1,PL1_8	0	0.049	0.659	.	0.553	.	.	.	0.83	1	1	0	0	36331.8	335	10	9.56	0	108	196	102	41	179	73	44	29	1.429
33	AlKewell_010145-T1		P9424_009175-T1		1		1		2.682	6.903	3.312	.	.	.	.	0	0	0	.	.	0	.	0	1	0.96	0.685	0.896	.	.	.	0.87	1	1	0	0	11077.7	101	4	7.847	8	35	60	28	11	57	22	14	8	1.304
34	AlKewell_009178-T1		P9424_005606-T1		1		1		2.681	6.212	3.312	.	.	.	.	0	0	0	.	.	0	.	0	0.962	0.897	.	0.906	.	.	.	0.81	1	1	0	0	9383.62	88	2.5	7.938	6	40	57	20	8	45	15	9	6	0.95
35	AlKewell_005598-T1		P9424_001539-T1		0.99672	2	1		2.663	5.197	3.305	.	.	.	.	0	0	0	.	.	0	.	0	1	0.637	0.902	0.512	.	.	.	0.55	1	1	0	0	21390.4	202	1	7.952	0	82	118	48	33	133	51	26	25	0.624
36	AlKewell_001529-T1		P9424_008219-T1		1		1		2.623	8.119	3.312	CfPDIP1	.	.	.	0	0	0	.	.	0	.	0	0.967	0.855	0.587	0.543	.	.	.	0.5	1	1	0	0	15156.1	139	1	6.744	3	43	78	38	14	73	34	19	15	0.909
38	AlKewell_008272-T1		P9424_007477-T1		1		1		2.611	5.816	3.3	.	.	.	.	0	0	0	.	.	0	.	0	0.906	0.852	.	0.699	.	.	.	0.47	1	1	0	0	14060.6	125	-4	4.516	6	46	72	31	23	75	21	9	12	1.103
37	AlKewell_008219-T1		P9424_012439-T1		1		1		2.609	8.598	3.312	MoSPD5,MoBas4	.	.	.	0	0	0	.	.	0	.	0	1	0.908	0.503	0.988	.	.	.	0.69	1	1	0	0	11206.5	105	-4	4.522	6	41	66	32	10	60	23	10	13	0.926
39	AlKewell_007465-T1		P9424_006767-T1		1		1		2.599	6.628	3.312	.	.	.	.	0	0	0	.	.	0	.	0	1	0.914	0.831	0.66	.	.	.	0.6	1	1	0	0	7173.44	66	7	9.173	7	30	39	15	5	38	13	10	3	0.765
40	AlKewell_012464-T1		P9424_004098-T1		1		1		2.595	4.141	3.276	.	.	.	.	0	0	0	PF07676	Repeat:PD40	0	.	0	0.9	0.856	.	.	0.526	.	.	0.38	1	1	0	0	17310.3	156	3	7.798	3	58	85	36	23	80	37	21	16	1.118
41	AlKewell_006752-T1		P9424_013581-T1		1		1		2.591	6.038	3.302	MoCDIP1	.	.	.	0	0	0	.	.	0	.	0	0.041	0.68	.	0.59	.	.	.	0.87	1	1	0	0	36322.5	354	5.5	8.715	6	155	238	111	19	194	56	31	25	0.911
42	AlKewell_004093-T1		P9424_003685-T1		1		1		2.587	6.288	3.233	VdPevD1	PevD1_(VDAG_02735)	reduced_virulence,unaffected_pathogenicity	PHI:8520	0	1	0	PF16541	Domain:AltA1	1	.	0	0.891	0.748	.	0.847	.	.	.	0.91	1	1	0	0	16113	154	-5.5	4.354	6	62	97	45	17	93	22	9	13	0.848
43	AlKewell_013611-T1		P9424_010683-T1		0.92557	23, frame shift, early stop			2.58	8.809	3.312	Foa4	.	.	.	0	0	0	.	.	0	.	0	1	0.944	0.932	0.622	.	.	.	0.62	1	1	0	0	10823	102	0.5	6.823	8	47	65	24	10	53	27	14	13	0.963
44	AlKewell_003683-T1		P9424_012668-T1		1		1		2.533	0.534	-2.368	.	.	.	.	0	0	0	PF01105	Domain:EMP24_GP25L	0	.	0	0.936	0.929	0.642	.	.	.	.	0.25	0	1	0	1	24150.5	217	2	7.733	3	69	111	64	28	118	49	26	23	1.429
45	AlKewell_002492-T1		P9424_004847-T1		0.99789	1	0.99363	1	2.533	3.824	3.308	.	.	.	.	0	0	0	.	.	0	.	0	0.768	0.805	.	.	0.511	.	.	0.32	1	1	0	0	17502	157	6	10.26	2	48	87	40	17	83	32	19	13	1.152
46	AlKewell_007957-T1		P9424_008219-T2		1		1		2.533	7.951	3.309	CfPDIP1	.	.	.	0	0	0	.	.	0	.	0	0.986	0.856	.	0.752	.	.	.	0.64	1	1	0	0	17486.6	160	-2	5.888	4	47	91	43	17	84	35	18	17	1.143
47	AlKewell_012693-T1		P9424_007266-T1		0.9986	1	1		2.518	6.761	2.954	MoCDIP1	.	.	.	0	0	0	PF14592	Repeat:Chondroitinas_B	0	PL9_3,PL9,PL9_1,PL31,GH160	0	0.808	0.713	.	0.869	.	.	.	0.45	1	1	0	0	25800.7	237	-3	5.307	2	81	134	65	27	129	51	25	26	1.093
48	AlKewell_008219-T2		P9424_011832-T1		1		1		2.518	4.537	3.256	.	.	.	.	0	0	0	PF13924	Domain:Lipocalin_5	0	.	0	0.776	0.638	.	0.63	.	.	.	0.67	1	1	0	0	20372.2	190	5.5	9.56	0	65	114	63	20	112	34	21	13	0.83
49	AlKewell_007245-T1		P9424_008826-T1		1		1		2.515	4.856	3.122	.	.	.	.	0	0	0	PF13472	Domain:Lipase_GDSL_2	0	CE3,CE2	0	0.901	0.704	.	0.626	.	.	.	0.68	1	1	0	0	26826.7	249	6.5	9.718	2	79	149	82	20	138	50	29	21	1.034
50	AlKewell_011856-T1		P9424_012581-T1		0.99333	2	0.9899	1	2.507	6.819	3.296	.	.	.	.	0	0	0	.	.	0	.	0	1	0.96	0.585	0.86	.	.	.	0.55	1	1	0	0	10981.4	99	5.5	8.097	8	38	60	23	16	56	22	15	7	0.875
51			P9424_008272-T1		0.99485	3	0.98964	2	2.505	5.945	3.038	.	.	.	.	0	0	0	.	.	0	.	0	0.93	0.865	0.728	0.577	.	.	.	0.38	1	1	0	0	21003.6	193	-0.5	6.329	5	69	108	52	23	99	48	25	23	1.3
91			P9424_007954-T1		0.98519	4	0.95506	4	2.303	6.256	3.312	.	.	.	.	0	0	0	.	.	0	.	0	1	0.907	.	0.817	.	.	.	0.7	1	1	0	0	9231.86	89	4	8.162	10	42	55	28	7	61	14	9	5	0.621
698	AlKewell_010691-T1
129	AlKewell_004837-T1
51	AlKewell_008828-T1
54	AlKewell_012606-T1
AlKewell only	AlKewell_007489-T1			AlenEC001					2.863	6.6	3.312	.	.	.	.	0	0	0	.	.	0	.	0	1	0.916	0.536	0.881	.	.	.	0.78	1	1	0	0	12482.6	116	5	8.504	8	41	72	31	5	64	25	15	10	0.846
AlKewell only	AlKewell_002492-T1			AlenEC002					2.576	5.813	3.31	.	.	.	.	0	0	0	.	.	0	.	0	0.999	0.839	0.618	.	.	.	.	0.58	1	1	0	0	21561.2	203	5.5	8.329	10	78	131	38	17	109	46	26	20	0.8
AlAvr1-1	rank 79 (P9424)		P9424_003204-T1						2.343	1.872	2.116	.	.	.	.	0	0	0	.	.	0	.	0	0.546	0.696	.	.	0.508	.	.	0.21	1	1	0	0	25431.6	230	-3	5.318	9	78	136	62	25	123	51	25	26	0.896
AlAvr1-2	rank 57 (AlKewell)		AlKewell_003206-T1						2.489	3.936	2.13	.	.	.	.	0	0	0	.	.	0	.	0	0.7	0.77	.	0.511	.	.	.	0.42	1	1	0	0	25216.5	230	0	6.441	9	83	139	66	23	126	49	25	24	0.804
[truncated: 42 more columns]
