# Supplementary material for: Comparative genome analysis identifies necrosis-inducing effectors in the lentil pathogen Ascochyta lentis in isolates with distinct virulence profiles
Source: Research Square preprint supplement (doi:10.21203/rs.3.rs-7803979/v1), 2025-10-22
Supplement: Supplementary file 5 [file a203f1fa8d747e4c402ea466.xlsx]

## Sheet: clones
ID	F-primer	R-primer	gDNA size	cDNA size	mature protein size	cysteines	notes	Signal peptide	known effector match	pfam names	MW mature (daltons)	MW (daltons)	RXLR like motifs	predector rank	sequence
AlenEC001 - AlKewell_007489-T1	JD1077	JD1078	381	330	99	8	AlKewell only	yes			10599	12482	yes	20	MRLLLVFSPLVATVLSAALDTRQFIPLVPACLNPKKPYPRCCTETITSDGDPLEGIPPSTTPGVCTNPGKGLSVDLTLATRCKRLKKGKAQCCPVKESTKTDGCENTVFQRNSFDV
AlenEC002 - AlKewell_002492-T1	JD840	JD792	612	612	182	10	AlKewell only	yes			19283	21561	yes	45	MRFILPLILSIASLALSLPRAQHEFDALGLRRCTNCVYAKELDSQDPATESKRAAFESANPNLRRCLDCVIQSPDMAITERDSPKDNSAIPVKRCFSCYFGSNAGGSGGTFDPNNPGDKAPPPTTPTKKKRCFSCYFGSSSGGSGGSFEPGNPPEQNPDKDVPVKAKRCFSCYFGSTAGGSGGTFDPNNPGDKAPPPTTPTKK
AlenEC003 - AlKewell_009152-T1	JD066	JD067	473	255	66	8		yes			7013	8917		1	MKLSFITCLLAQALIVSATRKYCNTATPLKGGGSCEGIAAKSLCCANNKSADRPNYHEECYTPTNDQGDEVDELCTGGGIYCCN
AlenEC004 - AlKewell_004309-T1	JD060	JD061	316	210	51	8		yes			5644	7470	yes	2	MQFFGLLTALFLASAAAACPDGPYKTNSACGGNCFNVQRCGDNNGIIRCENGFWREIRKCGHCRFGSCV
AlenEC005 - AlKewell_001364-T1	JD839	JD790	733	648	195	4		yes			21409	23616	yes	3	MYLNVIIIKILVLFLSCSSVKGKVRPFHGGILKGSPMWHRDSIDPSPNKKFLLSFAIRSANSETAEQALLSVSNPLSPTYGQFWTYSEVAAQFLPTPDAIHSVLTWLYRDIEPHDIRVSQDRSWIYAKVSIYAAETLLQAKYHFYRHNTSSEKHLACLNYTLPSSVRTHVDLVTPTTDLGVASLRENSRIQHQENTIMSKSLIKRQTNGLATCSRLTTPACMRELYGIPQAEKGHENNTLGVYQPAWASWLPADLDAFFGYFRPDLIGHRPPIIPINGGYWQDDVQGLPFNAEANLDMQITMSLSAPERVVNF
AlenEC006 - AlKewell_000025-T1	JD1099	JD1100	409	336	98	6		yes			10330	12526	yes	4	MKTTFAMSLFIATLTAASVLPNHDLNERAANKCKMFQIFRSPNGAFGGSPNFVGTPKCCCQNAQCHVVDRVNGINTSANLNQFLAGKFRIINARGGDNGRAGANDINGATYTVAGLGPC
AlenEC007 - AlKewell_003207-T1	JD1101	JD1102	211	162	44	8		yes			4915	7369	yes	5	MRRFLVLITCLTLSFVTFSHSQSCHDTCKFGDDHKPCNNCCGDECFSGYCAETKELVPHVYCKQA
AlenEC008 - AlKewell_008769-T1	JD1103	JD1104	452	270	80	12		yes			8409	10417	no	6	MQLFNTLLFITIAASSANAACIIAGSIDPNCCWGGKNNVDACNRQGACSVAGDTENYCAKFGITPEQCGADCCDTRTGWGKPCPKGRNACDRKTGCPFR
AlenEC009 - AlKewell_002830-T1	JD1105	JD1106	309	309	93	8		yes			10179	12035	yes	7	MLKKFIVVVALAITSVAASSCTNVDYCECHYPIPHKPNEFYRCWSHVGDRAHTGLLRGFDCNPTGVSTDNPAGTNPISHGCPGLHLGQPYAYNHCITVGVRHQRDACGPSI
AlenEC010 - AlKewell_013048-T1	JD1107	JD1108	390	390	120	6		yes	RiSLM,Mg1LysM,MgxLysM,MoSlp1,CfEcp6	LysM	13385	15298	yes	8	MRTFVLITLASAFGMSDATRRGCKSNPANPGEGWYHTTSSDTLNKVAADFCTTPAIINQWNNRRGELSPGINIKVPCHHVTRDCSNKGYYTIVSGDTLTKIAPDFCTNAQELERLNKQIKNPDYIVPGQIISVPCNWH
AlenEC011P - P9424_007481-T1	JD1089	JD1090	483	435	135	6	1 AA difference	yes			15071	16909	yes	14	MKSISVLLLLIASLGINAAPAREGIATSPVPAIHNPDMDTANASLTTRGGSSFSCGQYKFDDGTVQEFYSQVWAGIPADRMVCRYFKYEFRGKKGQEGTMVAAKVDAGCTCFFYERPCNPSDGHAEAWTGWMGWQNYAPTDKKFKGWYCFEQS
AlenEC011K - AlKewell_007469-T1	JD1089	JD1090	483	435	135	6	1 AA difference	yes			15140	16978	yes	9	MKSISVLLLLIASLGINAAPAREGIATSPVPAIHNPDMDTANASLTTRGGSRFSCGQYKFDDGTVQEFYSQVWAGIPADRMVCRYFKYEFRGKKGQEGTMVAAKVDAGCTCFFYERPCNPSDGHAEAWTGWMGWQNYAPTDKKFKGWYCFEQS
AlenEC012P - P9424_005128-T1	JD1087	JD1088	453	453	141	10	1 AA difference	yes	LmAvrLm3		15217	17890	yes	9	MMPAHTMSGKIILLLTFSIIAPAYAHGCRAISIAVVNSFNIPGNDDCKNWCNEGSMTRGFSAKLKLNDACQGANGLSALVAEIKSAPCASASRNCRNSCRCTVSTTAFRVHKDNQYKPDQGLVSCRLSDYVSRVTQTPFVEFGATTFASHYSLGSIQNDDVHCNSQ
AlenEC012K - AlKewell_005118-T1	JD1087	JD1088	453	453	141	10	1 AA difference	yes	LmAvrLm3		15251	17924	yes	10	MMPAHTMSGKIILLLTFSIIAPAYAHGCRAISIAVVNSFNIPGNDDCKNWCNEGSMTRGFSAKLKLNDACQGANGFSALVAEIKSAPCASASRNCRNSCRCTVSTTAFRVHKDNQYKPDQGLVSCRLSDYVSRVTQTPFVEFGATTFASHYSLGSIQNDDVHCNSQ
AlenNLP2 - AlKewell_009630-T1	JD243	JD241	785	729	217	2		yes	FoeNEP1,BfNep1,VdNEP,PpNPP1,PiNPP1,PsojNIP,PaSD21-1,MpNEP1_1,MpNEP1_2	Family:NPP1	23765	26209	yes	15	MRFTSIVSSLTVAAGVLGAPTALKARDVVAHDSLKPIPTRVQSGVVGRAIERFAPLLHIAHGCQPYTAVDDAGNTSGGLQDTGNVSAGCRDQSKGQLYARATWHKEKFAILYAWYFPKDQPNAGNVAGGHRHDWESVVVWLDNPANENPKILGGAASGHGSYKTTDNPNRQGDNVLVEYFTNFPTNHELQFTDTVGKSYWISDYDAMPTAEKDALASTTIFGNANVPFRPDNFEGNLDKAFV
