# Supplementary material for: Comparative genome analysis identifies necrosis-inducing effectors in the lentil pathogen Ascochyta lentis in isolates with distinct virulence profiles
Source: Research Square preprint supplement (doi:10.21203/rs.3.rs-7803979/v1), 2025-10-22
Supplement: Supplementary file 6 [file bcf7ce0c85b58ae1e4eca79c.docx]

Table S6 Variants between *Al*Kewell and P94-24 relative to *Al*Kewell determined by SnpEff 5.2.

| **Variant type** | **Variant value / effect** |
| --- | --- |
| Global SNPs | 78,148 |
| SNPs in coding sequences | 7,822 |
| Genes affected by SNPs | 3,318 |
| SNPs in coding sequences leading to amino acid changes | 3,904 |
| Genes affected by amino acid changes | 1,936 |
| SNPs in top 50 effector candidates | 20 SNPs in 13 genes |
| SNPs in top 50 effector candidates leading to amino acid changes | 10 SNPs leading to AA changes in 6 genes |
