# Supplementary material for: Comparative genome analysis identifies necrosis-inducing effectors in the lentil pathogen Ascochyta lentis in isolates with distinct virulence profiles
Source: Research Square preprint supplement (doi:10.21203/rs.3.rs-7803979/v1), 2025-10-22
Supplement: Supplementary file 7 [file eec8c0b9edda93ea99868692.xlsx]

## Sheet: Sheet1
Primer Name	Sequence
PLE_F1	CACTTGTGACTGGTACAAGAA
PLE_F2	GTCTGGAACGTCTTGCAC
PLE_R1	CTGAGCTCTCCTTTAATCATAC
PLE_R2	GAAATAGGATGTGAGGAGGC
Actin F	CTGCTTTGAGATCCACAT
Actin R	GTCACCACTTTCAACTCC
JD060	AAAAAGCAGGCTCCATGTGCCCCGATGGCCCA
JD061	AGAAAGCTGGGTAAACGCAGGAGCCGAA
JD066	AAAAAGCAGGCTCCATGACCCGAAAGTACTGT
JD067	AGAAAGCTGGGTAATTGCAGCAGTAGAT
JD790	AGAAAGCTGGGTATCGGCAGGACAAGTC
JD792	AGAAAGCTGGGTATTTCTTAGTCGGAGT
JD839	AAAAAGCAGGCTCCATGGGACCTGTTCCCCAG
JD840	AAAAAGCAGGCTCCATGCAGCATGAGTTTGAT
JD1077	AAAAAGCAGGCTCCATGGCGGCACTTGACACA
JD1078	AGAAAGCTGGGTAGACGTCGAAGCTATT
JD1087	AAAAAGCAGGCTCCATGCACGGCTGTAGGGCC
JD1088	AGAAAGCTGGGTACTGGGAGTTACAGTGGAC
JD1089	AAAAAGCAGGCTCCATGGCGCCTGCGCGCGAA
JD1090	AGAAAGCTGGGTAAGACTGCTCGAAACAGTAC
JD1099	AAAAAGCAGGCTCCATGTCAGTCCTACCCAACCA
JD1100	AGAAAGCTGGGTAACAGGGACCTAGTCCT
JD1101	AAAAAGCAGGCTCCATGCAATCATGCCACGATACT
JD1102	AGAAAGCTGGGTAGGCCTGTTTGCAGTAAA
JD1103	AAAAAGCAGGCTCCATGGCTTGCATTATTGCTGGC
JD1104	AGAAAGCTGGGTAACGGAACGGGCATCC
JD1105	AAAAAGCAGGCTCCATGAGCTCGTGCACTAATGTG
JD1106	AGAAAGCTGGGTAAATTGACGGTCCGCAAG
JD1107	AAAAAGCAGGCTCCATGACGCGCCGAGGCTGC
JD1108	AGAAAGCTGGGTAGTGCCAGTTGCACGG
